# Supplementary material for: Bioinformatic prediction of the stereoselectivity of modular polyketide synthase: an update of the sequence motifs in ketoreductase domain
Source: publisher site journal article supplement (doi:10.3762/bjoc.20.131), 2024-07-02
Supplement: Additional file 1 [file 1860-5397-20-131-S1.pdf]

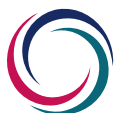

## Supporting Information

for

### **Bioinformatic prediction of the stereoselectivity of modular polyketide synthase: an update of the sequence motifs in ketoreductase domain**

Changjun Xiang, Shunyu Yao, Ruoyu Wang and Lihan Zhang

*Beilstein J. Org. Chem.* **2024**, *20*, 1476–1485. [doi:10.3762/bjoc.20.131](https://doi.org/10.3762/bjoc.20.131)

## Supporting Figures and Tables

## Table of contents

**Figure S1.** Phylogenetic tree of KR<sub>S</sub>.

**Figure S2.** Phylogenetic tree of KR<sub>C</sub> in a rectangular format.

**Figure S3.** Sequence logo comparison of actinobacterial KR<sub>C</sub>s

**Figure S4.** Sequence alignment of KR<sub>C</sub>s from non-actinobacterial  $\beta$ -modules

**Figure S5.** Sequence logo comparison of KR<sub>C</sub> from actinobacterial  $\gamma$ - and  $\delta$ -modules

**Table S1.** Stereospecificity-conferring motifs summary of KR<sub>S</sub> from actinobacterial  $\beta$ -modules.

**Table S2.** Stereochemical prediction of selected KR sequences.

**References**

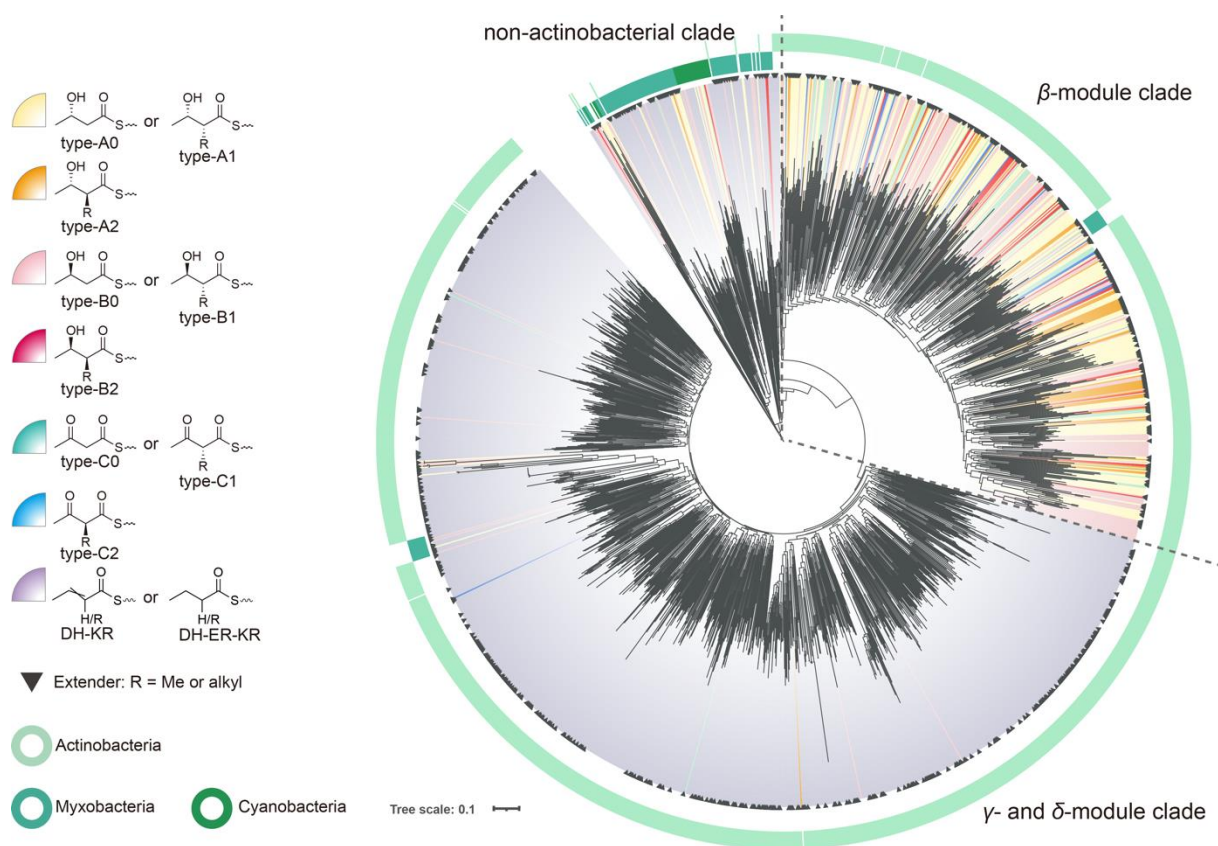

**Figure S1.** Phylogenetic tree of KR<sub>S</sub>. The colors of sectors represent different types of KR<sub>S</sub>. The colors of rings represent the species category of KR<sub>S</sub>. The inverted triangle indicates that the products have  $\alpha$ -substituents.

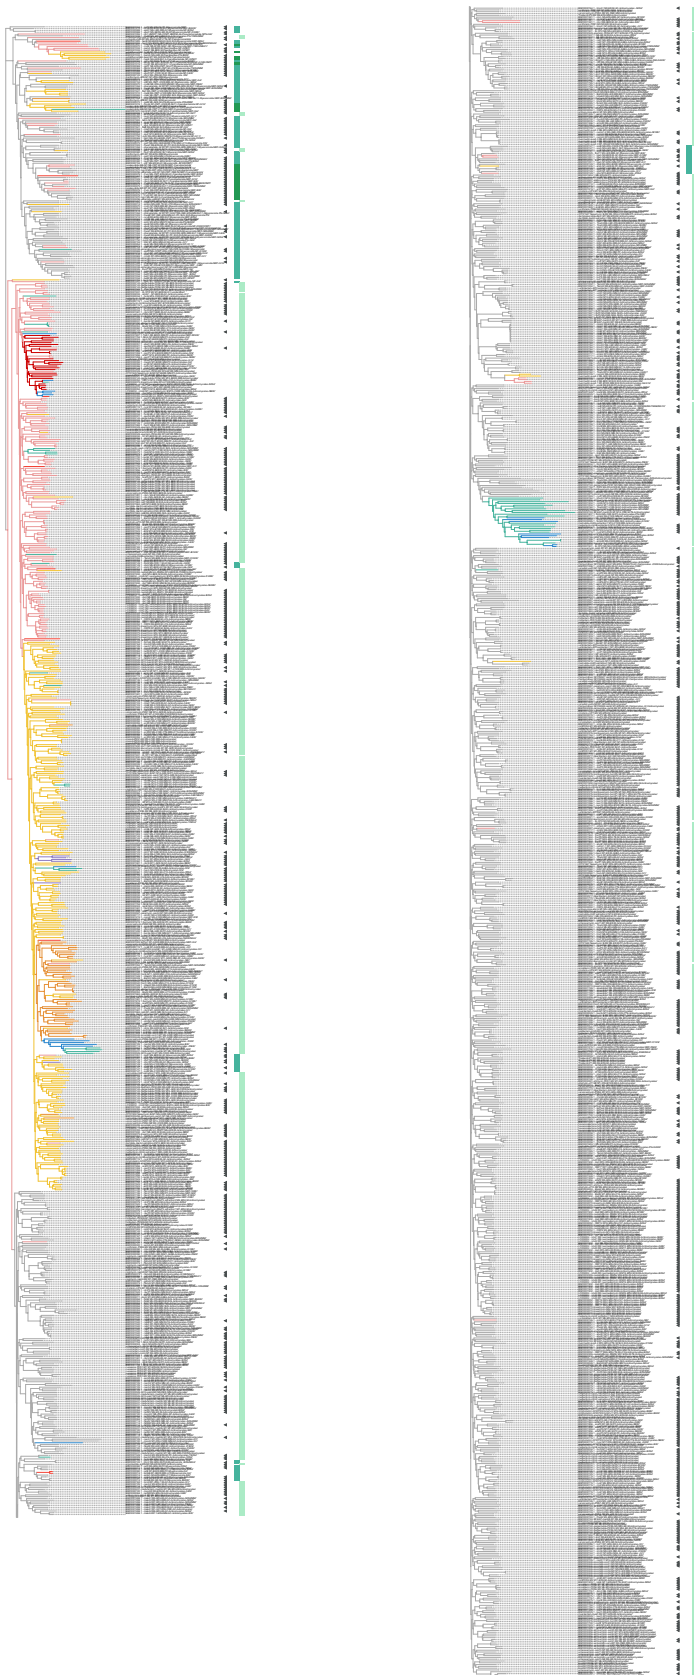

**Figure S2.** Phylogenetic tree of  $KR_C$  in a rectangular format. The tree is identical to Figure 2b, separated into two columns. Labels indicate the MIBiG ID or compound name, product type, taxonomy and upstream substrate information. See Supporting Information File 2 for details.

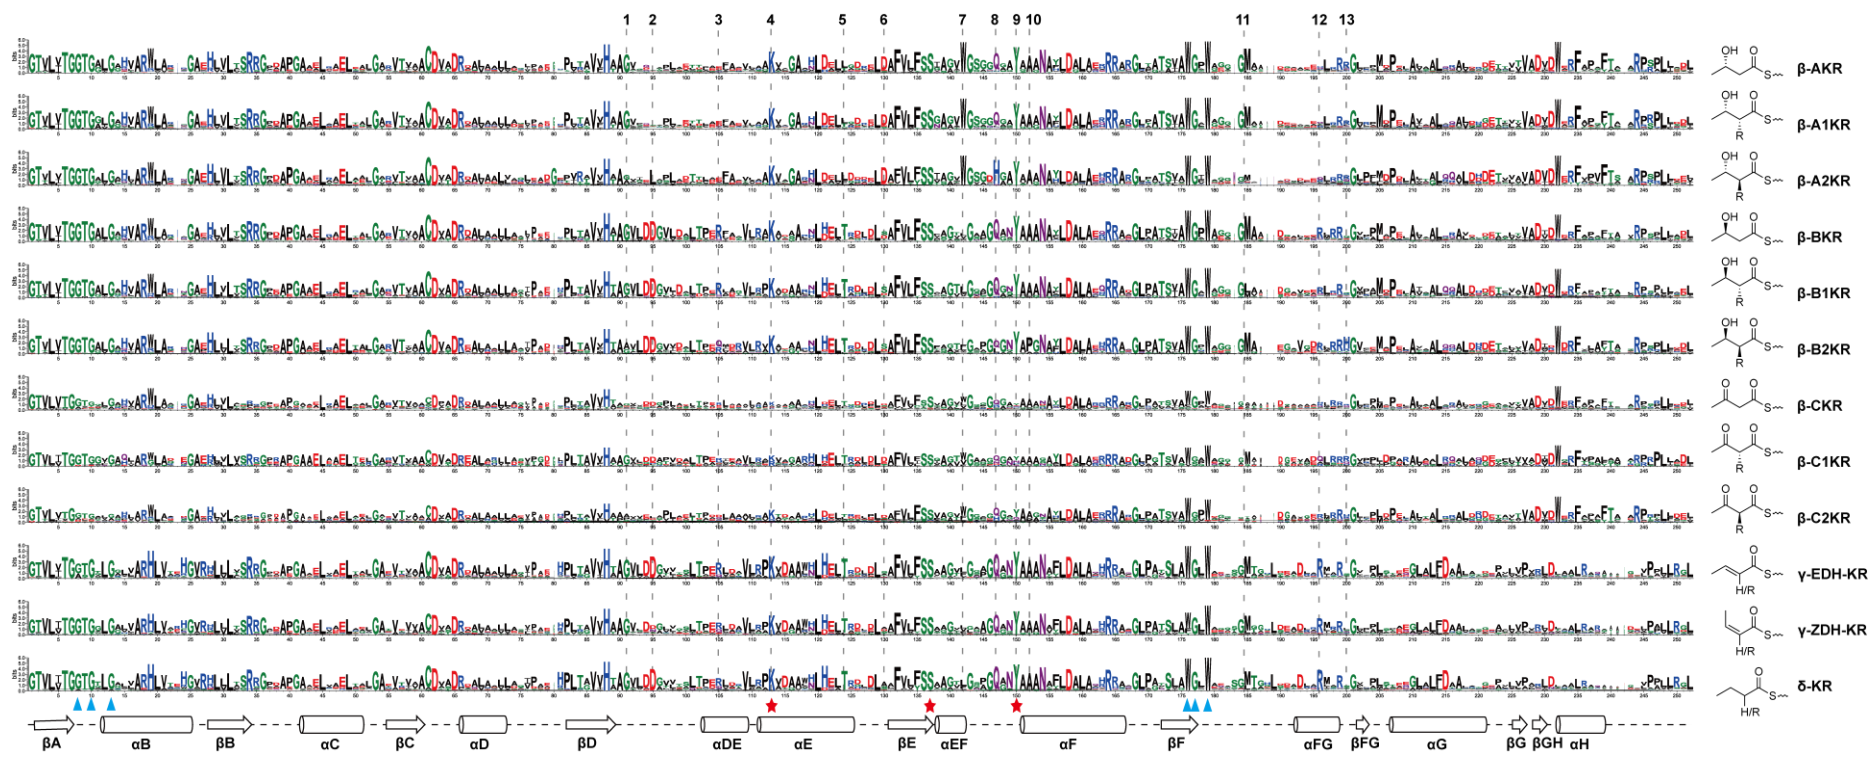

**Figure S3.** Sequence logo comparison of actinobacterial KR<sub>C</sub> based on the classification of their products. The key catalytic residues are marked by red stars, and the NADPH-binding residues are marked by blue triangles.<sup>1</sup> The numbers at the top are used to indicate the fingerprints discussed, which correspond to those in Figure 3a.







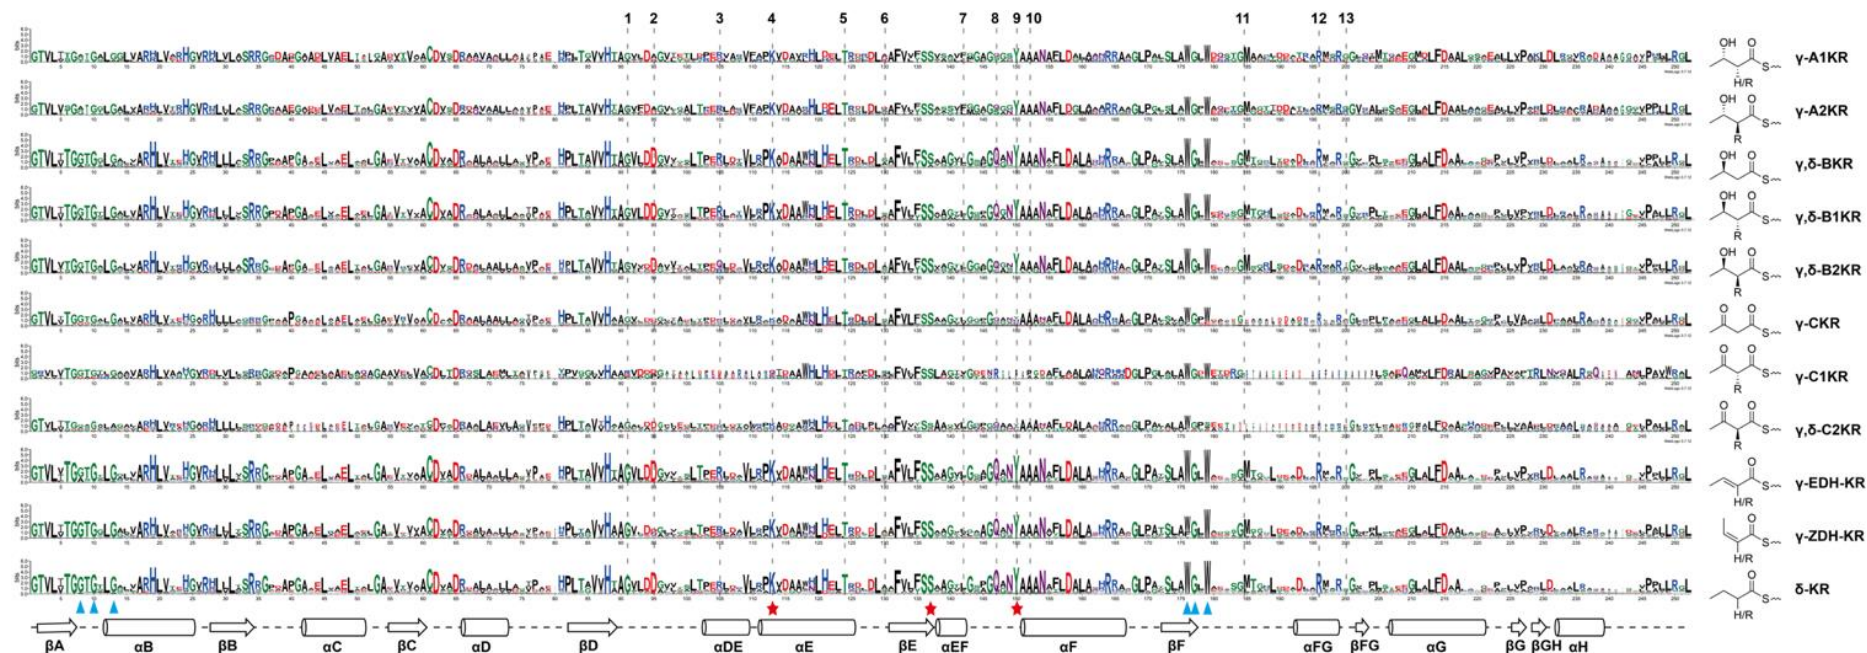

**Figure S5.** Sequence logo comparison of KR<sub>C</sub> from actinobacterial  $\gamma$ - and  $\delta$ -modules, based on the classification of their products. The key catalytic residues are marked by red stars, and the NADPH-binding residues are marked by blue triangles. The numbers at the top are used to indicate the fingerprints motifs.

|              | KR motifs |             |            |          |          |          |          |          |            |           |            |           |           |                         |
|--------------|-----------|-------------|------------|----------|----------|----------|----------|----------|------------|-----------|------------|-----------|-----------|-------------------------|
|              | G<br>(1)  | LDD<br>(2)  | R/Q<br>(3) | K<br>(4) | T<br>(5) | D<br>(6) | W<br>(7) | H<br>(8) | Y<br>(9)   | P<br>(10) | GM<br>(11) | R<br>(12) | H<br>(13) | NADPH<br>binding motifs |
| <b>A0/A1</b> | G         | xxx         | x          | K        | x        | <b>D</b> | <b>W</b> | Q        | Y          | A         | GM         | x         | x         | intact                  |
| <b>A0/A2</b> | G/A       | xx <b>L</b> | x          | K        | x        | <b>D</b> | <b>W</b> | <b>H</b> | Y          | A         | xx         | x         | x         | intact                  |
| <b>B0/B1</b> | G         | <b>LDD</b>  | R          | K        | <b>T</b> | x        | x        | Q        | Y          | A         | GM         | R         | x         | intact                  |
| <b>B0/B2</b> | G/A       | <b>LDD</b>  | R/Q        | K        | <b>T</b> | x        | x        | Q/L      | Y          | <b>P</b>  | GM         | R         | H         | intact                  |
| <b>C0/C1</b> | G         | xxx         | x          | <b>x</b> | x        | x        | x        | x        | <b>x</b>   | x         | xx         | x         | x         | incomplete              |
| <b>C0/C2</b> | no G      | xxx         | x          | K        | x        | x        | x        | Q/H      | <b>Y/Q</b> | A/P       | xx         | x         | x         | incomplete              |

**Table S1.** Stereospecificity-conferring motifs summary of KRs from actinobacterial  $\beta$ -modules. Motifs marked in red indicate strong motifs, and others indicate supportive motifs.



|                  | Motif (KR <sub>C</sub> ) |          |   |          |          |          |          |   |          |    |    | Prediction |         |       | Product |
|------------------|--------------------------|----------|---|----------|----------|----------|----------|---|----------|----|----|------------|---------|-------|---------|
|                  | 2                        | 3        | 4 | 5        | 6        | 7        | 8        | 9 | 10       | 12 | 13 | Previous   | Updated | Clade |         |
| Caniferolide M19 | <b>LDD</b>               | <b>Q</b> | K | <b>T</b> | S        | I        | H        | Y | <b>P</b> | R  | H  | B2         | B2      | B2    | B1      |
| Epemycin M13     | <b>LDD</b>               | <b>R</b> | K | <b>T</b> | T        | W        | Q        | Y | A        | R  | G  | —          | B1      | B1    | B1      |
| Epemycin M16     | <b>LDD</b>               | <b>R</b> | K | <b>T</b> | S        | F        | Q        | Y | <b>P</b> | M  | H  | B2         | B2      | B2    | B1      |
| Filipin M1       | <b>LDD</b>               | <b>R</b> | K | <b>T</b> | D        | W        | Q        | Y | A        | H  | R  | —          | B1      | B1    | B1      |
| Ibomycin M7      | GAE                      | D        | K | A        | D        | L        | R        | Y | A        | V  | L  | —          | A1      | A1    | B1      |
| Neaumycin M9     | GQL                      | E        | K | L        | <b>D</b> | <b>W</b> | Q        | Y | A        | L  | R  | A1         | A2      | A1    | A2      |
| Salinomycin M9   | VQT                      | D        | K | L        | <b>D</b> | <b>W</b> | <b>H</b> | Y | P        | Y  | R  | A2         | A2      | A1    | A1      |
| Tylactone M1     | <b>LDD</b>               | S        | K | <b>T</b> | D        | W        | Q        | Y | A        | S  | R  | —          | B1      | B1    | B1      |
| Ibomycin M17     | <b>LED</b>               | S        | K | <b>T</b> | D        | W        | Q        | Y | A        | R  | G  | —          | B1      | γ/δ-  | A1      |

**Table S2.** Stereochemical prediction of selected KR sequences. Motifs used for prediction are marked in bold. Prediction outcomes based on previous criteria (LDD, W, H, and P motifs) and the updated criteria, as well as based on phylogenetic cladogram, were provided.

## References

- Keatinge-Clay, A. T.; Stroud, R. M. The structure of a ketoreductase determines the organization of the beta-carbon processing enzymes of modular polyketide synthases. *Structure* **2006**, *14*, 737-748.
