# Supplementary material for: Bioinformatic prediction of the stereoselectivity of modular polyketide synthase: an update of the sequence motifs in ketoreductase domain
Source: Beilstein J Org Chem. 2024 Jul 2;20:1476–85. doi: 10.3762/bjoc.20.131 (PMC11228615; doi:10.3762/bjoc.20.131)
Supplement: File 2 — Supporting dataset. [file Beilstein_J_Org_Chem-20-1476-s002.xlsx]

## Sheet: KRs subdomains
BGC code in MIBiG or name of product	Name of protein	Order of module	Annotation	Extender	Organism	Taxonomy	Sequence
actinopyrone	atpn1	M1	EDH	MM	Streptomyces sp. SCSIO ZS0520	Actinomycetes	SETRIPAPENAENAENTELSLATWGLTACTDLDSLAGQVSRGEIAAPDVVLVQGVVPVHDLALDRGPEGSSGAEGVRQSAARALELVRQWLGTEQFDGARLVFVTRGAMAVEPGEEVRDLAGAALWGLIRAAETENPGRFGLLDLDEEPESVRALPRAIGSGEPQLALRGGESAVPRL
actinopyrone	atpn1	M2	B1KR	MM	Streptomyces sp. SCSIO ZS0520	Actinomycetes	WLAYTGAGAEPPKELMSALEAAGARTAHVPDLPELERRLREEPEIAGVLSLDIGTAATLALLKGLARGGVEVPVWHLTRQAVRAVPEDPAPLPEQAQVWGLGRVAALEYPRLWGGLVDLPGQPEPEAPEAEEAQAPGPYAELVRQLRGGGAAQDGEDQLAVRRTGAYARRL
actinopyrone	atpn2	M3	EDH	MM	Streptomyces sp. SCSIO ZS0520	Actinomycetes	RTLPDHAEPKNPENSENPESPENPESSGAAAGLDALVGLQGLEVLRSLPEFPRTVLLDLRPESGSTTGFEPGAAAPTATLHRALRTVRAWLADERATAVDARLVVLTRKAVAVTAAEVPCLEAAPVWGLLRSAQTEQPGRFVLVDVDEDEDKDEREDAAASAERVVGAALATGEPQLAFRGGEFRVPRL
actinopyrone	atpn2	M4	EDH	M	Streptomyces sp. SCSIO ZS0520	Actinomycetes	WAVLAAGDGSVAAEDSLIRALQAAGAQVRRIPELGAADEAAEAGADGTGSAQVVVWVRDDPEAADTAAEGTDVLLRTLETVQHWLREDGFADRRLTVLTRGAVALPGETPRPAQAPVWGLLRSAQAEHPGRFLLVDVDGQEESLRALPAAVACGEPQLAVRRGRLSVPRL
actinopyrone	atpn3	M5	ER	MM	Streptomyces sp. SCSIO ZS0520	Actinomycetes	WAVWGGALDSSVLPKAQRIAGLAELSEAPEVLVLPVAGPDGADPVRGAQLPGAVRTVAADVLGALQAWLDSDPPEHSRLLVLTRGAVAVGTEEPDLLTAAVWGLVRSAEKENPGRLVLVDTDGSPRSLAALPSAAASGEPELLVRDGELRVARL
actinopyrone	atpn4	M6	EDH	M	Streptomyces sp. SCSIO ZS0520	Actinomycetes	WAVLGETEWTGSGAEVHRDPAELVGALAEERAAAPEVVFWRPQLGEGTAQEVTATEVHDAAEQVLTQLQVWLAEDSLRGARLAVVTEAAAPELLREPVHALVRAAESENPGRFLLLDMDEDAASREALPRAVATALAAEEPQLALYAGELTVPRI
aetokthonostatin	aesJ	M4	AKR	M	Aetokthonos hydrillicola Thurmond2011	Cyanobacteriota	LVFIDNTGLGEALATRLEKEGSTIFTIRKGQEFSKDRDGEYTINPSKSKDYEILIGELTKQVGIFDAILHCWNVDPISSLDGDSDRECFEKAQEIGFYSLLYLTQALDKYKITSPIKILAIATETQAVESTDTVCPEKSTLLGACLVIPQEYLNIRTQAIDICFPSQKKALRTFSELAERLLLELKASTTEPRIAYRGAYRLIQNF
aetokthonostatin	aesB	M6	A1KR	M	Aetokthonos hydrillicola Thurmond2011	Cyanobacteriota	WLVFADEHSFGVEMVNRLKREKQDVITVFKGDRFAPADDGGYYINPELPSDYTSLIREIKATEKSPTRIVHFWNLTPDISTSGKDKFAKWQAYGYYSLIYLAKALTQEQTTGSTKILVISSQVQNVIGTEALCPEKATMLGACQVIPQEENNIACISIDLSLPEAEAEPERVVGQLLAEIIKESPEKIIAYRNRQRFVRKF
aminoansamycin	aasA	M1	AKR	M	Streptomyces sp.	Actinomycetes	WLAVVPAGAAAGQSAAILDGLRAQGAEFTVYEAGTDPEAYGPALRAALAEAGGIRGVLSLLALDTRPHPEHPAVTRGLAALAHLLPALAESGTEARVWSLTQGAVTGSPDGVVEDPAQALVWGFGVAAALEFPRLWGGLVDVPAAGGLDRRALRRLAVALGGPRGEDQLAVRASGIFARRL
aminoansamycin	aasA	M2	EDH	M	Streptomyces sp.	Actinomycetes	WRELDVTAEPEGSSVPEQVRTLTGRVLAAVQEFVEDAEPGSGPLVVTARSGHPATAAVRGLLRTAQLEHPDRIVLAELDGTAESRKALAAAVATGEPQFRLSEGALSVPRL
aminoansamycin	aasB	M3	EDH	M	Streptomyces sp.	Actinomycetes	WRELDVTAEPEGSVPEQVRTLTGRVLAAVQEFVEDAEPGAGPLVVTARSGHPATAAVRGLLRTAQLEHPDRFVLAELDGSEASEWALPKALACGEPHFRLTDGEMTVPRL
Amphotericin	AF357202_AmphB1	M1	A2KR	MM	Streptomyces nodosus	Actinomycetes	WLLVSAGGVDDDVAEVLEAGGAEVRRLVLDETCTDPAVLREHLTDTDGLTGIVSVLADAEEGCVRHPGLTLGLALSVSLAQALGEADVTAPLWFLTCGAFSTGPSDTVTRPLQSQIAGLGWTVAVEHPHRWGGGVDLPEALDARAAQRLVAALAGALGDDDQLAVRPAGVLARRI
Amphotericin	AF357202_AmphI2	M10	AKR	M	Streptomyces nodosus	Actinomycetes	WLLVSSDATADDETELLDGLAEALGAHGARVRRLVLDADCADRAVLGARLADTENADNTAQVLSVLPLDERPTDGPAGFTQGLALTIALVQALADTGAHGRLWTATRGAVSTGPADPVTHPAQATAWGMGRGVALEHPRLWGGLVDLPADFDRGAGQRLAEVLAVKDAPDGEDQVALRATGVHGRRL
Amphotericin	AF357202_AmphI3	M11	A2KR	MM	Streptomyces nodosus	Actinomycetes	WLLVSADGVDDTDVAEALETGGAEVRRLVLDESCTDRAVLRERLTDADGLTGIVSVLAGAERTGAVPGTGLVLGVALTVALVQALGDAGIDTPLWALTRGAVSTGRSDKVTAPVQAQVTGIGWTAALECPGRWGGVVDLPETLDARAGQRLAAVLAGALGDDDQIALRSSGVFTRRI
Amphotericin	AF357202_AmphI4	M12	BKR	M	Streptomyces nodosus	Actinomycetes	WLVLVPAEHRDEATAAWAADVEAALATATVRVEVTGTDRAALAARLTEAADGDTFQGVLSLLALAPGDAGHPGAPAALTLTATALQALGDARIDAPLWNITRGAVAVGRSEQVTAPEQAAVWGLFRAAALELPARVGGSVDLPEDLDTQAARRLRGILAAADGEDAVAVRASGVFLRRL
Amphotericin	AF357202_AmphI5	M13	CKR	M	Streptomyces nodosus	Actinomycetes	VLALVPAEHAGTDWAETLVAALGADPLVVDGTSGSLARELADLVPQQATFAPSRRPARTLAAPAESPSTSSTGTSGRHTESTHRTPLLDGQTSPAGTLDPAGWTVVVSLLAAGTGTLPAPDAAPAAVLEALEAAGVDAPLWCVTRGAVSVAGEAPAAVGQAALWGMGRVAALEHPERFGGLADLAPDADAATAALLAAHLAEPGGEDQIAVRATGLFGRRL
Amphotericin	AF357202_AmphI6	M14	BKR	M	Streptomyces nodosus	Actinomycetes	WLAVVPEGLGEDPWVTTALDALGTRVVRAEVGADGREAMAATLREAAGEGTRFGGVVSLLALRETVHGDVPEGVALTGTLLQALGDAGIEAPLWCVTRSAVSANRSDRPRRPLQAAVWGLGRVAALEYPNRWGGLVDLPERADERAAAGLAAVLAGLDGEDQVAVRGSAVLARRL
Amphotericin	AF357202_AmphJ1	M15	0DH-BKR	M	Streptomyces nodosus	Actinomycetes	WAVLGEDPFGLTAALAGDSEAVAGVHAPAATLEELAARSGAVPDMVAVTVRGDADGGPEAARELTREVLALVQGWLAEPAFASSRLVVVTRDAVADGERGAVDLAAAPVWGLVRSAQSENPGRLLLADVDDTADSLARLPLLAGLFDAEEPQAVVREGTVRVGRL
Amphotericin	AF357202_AmphJ2	M16	ER	M	Streptomyces nodosus	Actinomycetes	WAVLGEDPFGLTAALAGDSEAVAGVHAPAATIEELAARSGAVPDMVAVTVRGDADAGPDDAHELAHEVLALVQGWLAEPAFASSRLVVVTRNAVADGERGAVDLAAAPVWGLVRSAQSENPGRLLLADVDDTADSLARLPLLAGLFDAEEPQAVVREGTVRVGRL
Amphotericin	AF357202_AmphJ3	M17	0DH-BKR	M	Streptomyces nodosus	Actinomycetes	WTVLGDALPGLDTALAAVDNVLVTRADSLAELLDSGAPLPSLMLLPVEGGPTAGHDLPAAVRAATTRVLDLLRRWTSDPRTADSRLAIVTRGAVAAGREDVTDLAAAAVWGLVRSAQSENPGCFLLLDLDPADAAEATDAAVLASLPALFDAGETQAAVRGGALTVARL
Amphotericin	AF357202_AmphK	M18	0DH-BKR	M	Streptomyces nodosus	Actinomycetes	WAVVGSDELDLGYAMHRADETVTAYAESLGGAIGDSGVAPDVFLIPLAGEKDAGAEGVHALTTRVLGYLQEWLSEPRLSGTRLVFVTRRAVALDDEDVLDPAGAAVWGLVRSAQTENPGSLLLVDLDDTFLSAGVLPDVLTLDEQQLAVRDYQVRAARL
Amphotericin	AF357202_AmphB2	M2	A1KR	MM	Streptomyces nodosus	Actinomycetes	LLAVISPDHAGAPWVTAVLDALGPDTVRFEAKGTDRAAWAAQLAQLREDEGEFHAVVSLLAAAEALHTDHGSVPLGLAQTLLLAQALGDAGLTAPLWCLTRGGVAAGRGDVLSSPVQGALWGLGRVIGLEHPDRWGGLIDLPETVDTRAAARLTGLLADAGGEDQLAIRGSGVLARRL
Amphotericin	AF357202_AmphC1	M3	EDH	M	Streptomyces nodosus	Actinomycetes	VALVGADPAGLADTLRTGGVQVTVHPDLAALAADPAPVPGTVLTALPGDQDTPAADAAHTTAAAVLGLAQHWLTEDRFADARLVLVTRDATAGGDLAAAAAGGLIRTARTENPGRFVLLDLATGTPAAPAALVAALAAAYDEPDLAVRGSDVLTARL
Amphotericin	AF357202_AmphC2	M4	EDH	M	Streptomyces nodosus	Actinomycetes	LALLGPDTDDLAEALGEGAVRYATLADLLAADAPVPGAVLVPLTAGSDTDDTPGAVHTRTAAALTLLQEWLAEDRFNGSRLVLVTRGAVATDDAPVTDLAAAALVGLVRSAQTENPGVFGFMDLDADGASDSALTRALGLDEPQLALRGGRALAARL
Amphotericin	AF357202_AmphC3	M5	0ER-EDH	M	Streptomyces nodosus	Actinomycetes	VALVGPDTTGLAADLTAAGAAVTAHQDLAALAADGTDIPGTVVVTVDGTAAPVAEAAHTVAAEALALAQRWTAEDRFAGARLVFATCGAVEAGGSQVTDVAAAAVWGLVRSAQSESPDTFVLVDREAADAAGDAAERGSLFLAALGSGEPQLALRDDVVLAGRL
Amphotericin	AF357202_AmphC4	M6	EDH	M	Streptomyces nodosus	Actinomycetes	AALVGEDPFGLVRSLREAGTEIGRRASLTDDAELPDLLLLPVTAEEHEEAADTPAVTHALTRQVLELVRARLEDERHAATRFVFVTRGATTGHDLAAAAVWGLVRSAQSENPGCFGLIDLDPETTRPLPLTALLGDEPQLRLQDDDLRAARL
Amphotericin	AF357202_AmphC5	M7	EDH	M	Streptomyces nodosus	Actinomycetes	VALLGTDGDPLGLAAALTGAGTTVRTYPDVAALVAATVAADGPVPEVVVHGVASHDGEPASDAAHRLTADALDTVQSRLSEDRLAGARLVFVTRGAVDTRDLGAAAVQGLVRSAQTENPGALGLVDLDGTPESAAALAAALGSAEPQLALRDGRPHAARL
Amphotericin	AF357202_AmphC6	M8	EDH	M	Streptomyces nodosus	Actinomycetes	VAIVGADPFGLADAFAGAGLTAVTAADLTALTASSEAAVPDTVLVPVAGAPADGADLPGAVREVTGRVLALLQQWPVEEALAASRLVFVTRGAVAVDDGGTADLAASAVWGLVRSAQTENPGCFGLLDLDPAAAVPSARLVEALTAGAEEPQLALRGIEVVAARL
Amphotericin	AF357202_AmphI1	M9	EDH	M	Streptomyces nodosus	Actinomycetes	AALVGEDPFGLRALPQFGDLAVHPDLADLAAADGAVPDTVLLPLTGTGPDADPVTAAHRAATEALAAVRTWLEQDERFAASRLALVTRGATTGHDPAAAAVWGLVRSAQSENPGRFLLVDLDADQDTPALPAAALTSEEPQLAVRGEELRAARL
ansatrienin	PKS1	M1	ER	M	Streptomyces flaveolus	Actinomycetes	GGLDGLRVLDATGDGTAAADVHALTSRVLGDLQAWLAEPGGESARLLVVTRGAVAARDGESVTDPAGAAVWGLVRSAQSENPDRIVLADTDGHDASRDALTGVPAAAAALEEQQFAIRHGETSVPRL
ansatrienin	PKS2	M2	ZDH	MM	Streptomyces flaveolus	Actinomycetes	WLVAVPAGRADDATVTACLTALRDRGADVVPLPVAGSARDALADLLTGTVPDLDAITGVLSLLALDETAHPGHPGVTGGLAASVVLVQALGDTEIEAPLWIVTQGAVAAHDTDLVHSADQAALWGLGQVAALEHPDRWGGLIDLPATLDDETCARLTAVLGGGSGQEDQLALRAGTVLARRL
ansatrienin	PKS3	M3	A1KR	MM	Streptomyces flaveolus	Actinomycetes	WLVVVGAGDDPRAEAVAAGLAERGAQTVRVEVDTEHSDRGTLAALLPDQPLAGIVTLLALDGRPHPAHTTWSRGAIGTVTLVQALDDAGIKAPLWAVTSGGVAVADPAELTDVSQHVIWGIGTVLALDNPRTWGGLIDLPPGTGEPDPHSLDLLCTALSGVDDEDQLAVRPDGLHARRM
ansatrienin	PKS3	M4	0DH-BKR	M	Streptomyces flaveolus	Actinomycetes	DVEVEVVEVPRSVALDAGVVREVTAGVLSVVQSFLAESRGGWLVVVSRGAVSVDGDGGVVDPVGAAVWGLVRSVQAESPGRVVLVDVGVDGVVPARGVLAGVIGSGEPQVAVRSGGVFVPRL
ansatrienin	PKS4	M5	EDH	M	Streptomyces flaveolus	Actinomycetes	VPLPVSEGVDDVEVEVVEVPGSVSWDAGVVREVTAGVLSVVQSFLAESRGGWLVVVSQGAVVVGGDGGVVDPVGAAVWGLVRSVQAESPGRVVLVDVGSGGVVPGGGVLAGVIGSGESQVAVRSGGVFVPRL
ansatrienin	PKS4	M6	EDH	M	Streptomyces flaveolus	Actinomycetes	LPAAGGVGDVEVEMEVVEVPRSVALDAGVVREVTAGVLSAVQSFLAESRGGWLVVVSQGAVVVGGDGGVVDPVGAAVWGLVRSVQVESPGRVVLVDVGVDGVVPARGVLAGVIGSGESQVAVRSGGVFVPRL
ansatrienin	PKS5	M7	EDH	M	Streptomyces flaveolus	Actinomycetes	VPHPVSMGLDIEELVRSGASMPEVLVVDAVDGVVSPERVRGLVGRVLGIIQAFLAAPELESTRLLVVTRGAVGVRGDTEVSDPAGAAVWGLVRAAQAENPDRVLLMDVDEIQSSRPALAGLLATGEPQVAVRADVVHLPRL
ansatrienin	PKS5	M8	AKR	M	Streptomyces flaveolus	Actinomycetes	WLMLVPAGHAEALAEATSGALTAHGGRVVRVDVDGEDRKGLAGLVRACLDAEPGTPAGVLSLLALDERPDPDHSSLSRGTTATVTLVQSLKDLDVAAPLWCLTSGAVAVREDGEVRSESQPAIWGLGTVLALDHPRTWGGLVDVAAEPDETALGRLVAVLRGQYGEDQVAIRSTGAYARRM
argenteolide	agt39	M5	ER	M	Streptomyces argenteolus	Actinomycetes	TVVLGGTGELSQLLGGAPCYAGYGDLLAAAVRPHRIVVDATTPAEDGSGAAARDAVLAALPVLQKLLAEDAFAGAELVWVTRDAVAARPEDTVPALDAAPLWGLIRSVRGEYPDRVLRLVDLDPAGTEPGLLDRALALTGEPELALRAATAHAPRL
Avermectin	aveA1	M1	B1KR	MM	Streptomyces avermitilis	Actinomycetes	WLIAIPETQTHHPHITNILTNLHHHGITPIPLTLNHTHTNPQHLHHTLHHTRQQAQNHTTGAITGLLSLLALDETPHPHHPHTPTGTLLNLTLTQTHTQTHPPTPLWYATTNATTTHPNDPLTHPTQAQTWGLARTTLLEHPTHTAGIIDLPTTPTPHTLQHLTQTLTQPHHQTQLAIRTTGTHTRRL
Avermectin	aveA4	M10	CKR	M	Streptomyces avermitilis	Actinomycetes	WLVVSEGEAGPVDVVAEGLERCGARVVRVEVEAGCVSREVLAGHLREAVDGEAVGGVVSLVGWGSGVVQAGVASVGLVQALGDVGVGARLWCVTGGAVSVGGRDAVWGPASGVVWGLGRVVGAEAPDRWGGLVDVPELVDERVVDGLVGVLAGVGGGGESEFAVRSSGAFVRRL
Avermectin	aveA4	M12	EDH	M	Streptomyces avermitilis	Actinomycetes	WALIGPGARRTAAVLERNGASWQAYPDPAALAEALAAGAPAPGMVVISCEPDGASAPTDSALTDSALTDSAPAGSAPADSTALADATRQATTRVLALLQEWVADERLAACRLALLTHGSVTATPDEPVSDLAHAAVWGLVRSVQTENPDRFLLADTDDTDASRNALPLLAGEPQIALRNGAVRIPRM
Avermectin	aveA1	M2	0DH-BKR	M	Streptomyces avermitilis	Actinomycetes	WAWHEDVGESGGGPVPGVVVLRCPDAGAGGGGGGGGGGGVGEVVGGVLGVVQGWLGLERFAGSRLVVVTRGAVVAGPEDGPVDVVGASVWGLVRSAQAEHPDRFVLLDLDTDTGTDLDTGAGAGWGVDGGRVAAVVACGEPQLAVRGERLLAARL
Avermectin	aveA2	M4	BKR	M	Streptomyces avermitilis	Actinomycetes	WLIAIPETQTHHPHITNILTNLHHHGITPIPLTLNHTHTNPQHLHHTRQQAQNHTTGPITGLLSLLALDETPHPHHPHTPTGTLLNLTLTQTHTQTHPPTPLWYATTNATTTHPNDPLTHPTQAQTWGLARTTLLEHPTHTAGIIDLPTTPTPHTLHHLTQTLTQPHHQTQLAIRTTGTHTRRL
Avermectin	aveA2	M5	AKR	M	Streptomyces avermitilis	Actinomycetes	WLIAIPETQTHHPHITNILTNLHHHGITPIPLTVNHTHTNPQHLHHTLHHTRQQAQNHTTGPITGLLSLLALDETPHPHHPHTPTGTLLNLTLPQTHTQTHPPTPLWYATTNATTTHPNDPLTHPTQAQTWGLARTTLLEHPTHTAGIIDLPTTPTPHTLHHLTQTLTQPHHQTQLAIRTTGTHTRRL
Avermectin	aveA2	M6	EDH	MM	Streptomyces avermitilis	Actinomycetes	WAVIGAGLPHLPGLTEHEHVTAYDEPADLLLALDRGAPPPGVLVVGGVAHTEAREYSAEAPGERGTEACEARPDVVHVGVVHTAAVHAAAAQMLARLQAWLGDERLADSRLLVLTCGAVARASGDDATDLPGAAVWGLVRSAQSEHPDRITLLDFERGTEAEPGQLATALNCGERQLAVRPGGLFTPRL
Avermectin	aveA3	M7	0DH-B1KR	MM	Streptomyces avermitilis	Actinomycetes	WAWHEDVGESGGGPVPGVVVLRCPDAGAGGGGGGGVGEVVGGVLGVVQGWLGLERFAGSRLVVVTRGAVVAGQEDGPVDVVGAAVWGLVRSAQAEHPDRFVLLDLDTDTDTGTDLDTGAGAGAGAGWGVDGGHVAAVVACGEPQLAVRGERVLAARL
Avermectin	aveA3	M8	EDH	M	Streptomyces avermitilis	Actinomycetes	VCGQAWAWHEDVGESGGGPVPGVVVLRCPDAGADGGGGGGVGEVVGGVLGVVQGWLGLERFAGSRLVVVTRGAVVAGPEDGPVDVVGAAVWGLVRSAQAEHPDRFVLLDLDTDLDSGADADAGNEAGMGSGLDGGRVAAVVACGEPQLAVRGERVLAARL
Avermectin	aveA3	M9	EDH	MM	Streptomyces avermitilis	Actinomycetes	VLVSGGASVVVLDGADDLVGLAAEEDGVPGVVVLRCPDAGADGGGGGGGVGEVVGGVLGVVQGWLGLERFAGSRLVVVTRGAVVAGPEDGPVDGPVDVVGAAVWGLVRSAQAEHPDRFVLLDLDTDLDSGADRDAGNEAGMGSGLDGGRVAAVVACGEPQLAVRGERVLAARL
BGC0000001.1	abyB1	M1	EDH	M	Verrucosispora maris AB-18-032	Actinomycetes	RQIRVEPVADATAALAMLHERLDATEPTALVVPHLDRTGAAGLVRSAQAEHPGRFVLIHADDPVRTVPDGEPEAAWRDGSWWVPRL
BGC0000001.1	abyB1	M2	EDH	M	Verrucosispora maris AB-18-032	Actinomycetes	YATVVAPRTGADASAAYAAVTWALDALRQHEGDEPLVVRTVDDPAGAAVRGLVRTAQTEQPGRFVLFTGSGDPEPALVRAALASGEPEVALRDGTLMAPRL
BGC0000001.1	abyB1	M3	EDH	M	Verrucosispora maris AB-18-032	Actinomycetes	GRDVGLPRYAELSTSTDDIVERAHDRVTEVAELLRRWLAQGPPEARLVVATDQVTDPADGVLWGLVRAAQTEHPDRFVLLDSDGDPRSRTLVPGALATGEPQLVVRDGRITVPRL
BGC0000001.1	abyB2	M4	0DH-C2KR	MM	Verrucosispora maris AB-18-032	Actinomycetes	RGAAATEPVPHELPGDAGPAALAVLRGGLAEPDGPRQVVVARGAGTVTGLVRCAQLEEPGRVGLVEWDGRDADALRDAVAAGLPQVAVHGAELRTPRL
BGC0000001.1	abyB2	M5	ER	MM	Verrucosispora maris AB-18-032	Actinomycetes	VTEPDLLVVAPSDAHDPVAATGRLVTSTIAELAGRLADDRGAVVVTRDAVAVRPGDPAADLAHAALWGLLRSAQTENPDRFTLVDTDGRPESAAVVAAAVATGEPQIAVREGRGYVPRL
BGC0000014.1	ambB	M1	B2KR	MM	Sorangium cellulosum	Myxococcota	HVVLGADGALASGLGALALAGLPELLEALENGAAAPERLVLDLTEGRPGAVAESVHATTRSALALVQAWLAAPRLSGTELVVVTREAVAAGPDEGVAALGPAAVWGLLRTVRVEHPERAVRSVDLGREPPDVAVLRRALGTAAEPELALRAGGARAPRL
BGC0000014.1	ambB	M2	ER	M	Sorangium cellulosum	Myxococcota	HVVVGGDGALAAALGARAVAGLPELLASLPDGAAAPRRLVVDLTADAAGAVVDAVHAAARDALSLVQGWLAAPQLAATELVVVTRGAVAVAPDEGVAALGPAAVWGLLRATRVEHADRTVRMLDLGPGAPDMALLRRALTAAEEPELALRAGGARAPRL
BGC0000014.1	ambC	M3	EDH	MM	Sorangium cellulosum	Myxococcota	HIVLGGDGALAAALGARTAALPELIAALPEGAAAPRRLVIDAAAGDPGDGLVAAAHAATQRVLSLVQGWLSEARLADSELVVVTRGAVAAGPDDGVAALSHAPLWGLVRTARQENPGRAVRLVDLGPEPLDGALVRRAVAAAEEPELALRGGAARAPRL
BGC0000014.1	ambC	M4	EDH	M	Sorangium cellulosum	Myxococcota	SVVVGGDGALAAALGVRAVAGLPELFAGGAAAPRRLVIDATAGDPGDGLVAATHAATQRGLALLQGWLAEARLASTELVLVTRGATAAEPDEGVAALSHAPLWGLVRAAREEHPARALRLVDLGREAPDGAVLRRAIAADDEPELVVRRGALRAARL
BGC0000014.1	ambD	M5	EDH	M	Sorangium cellulosum	Myxococcota	HVVLGGDGALAAALGVRAAAGLPELLEALADGAAAPRRLVVDLTAGDAGAVVAAVHAAVRGALALVQGWLAAPQLAATELLVVTRCAVATGPDEGVDALGPAAVWGLLRATRAEYPDRAVRVLDVGREPLDGALLRRALAAGTEPELSVRSGEARAPRL
BGC0000014.1	ambE	M6	EDH	MM	Sorangium cellulosum	Myxococcota	QVVLGPDGELATRLGARRAGNLDELFADGEAARPAPRRLVVDARTRRDGDVPAAVHQATRQALELVQRWLADARLTDTELVVLTREAVSTGPDVGVEDLGHAALWGFLRAVRSEHPDRGVRLIDLGPDASAAELLDRALETVAEPELALRQGIALAPRL
BGC0000014.1	ambH	M9	AKR	M	Sorangium cellulosum	Myxococcota	WLILDDQAERAAALQDYLEARGQTCVRVVAADTYARRGARDYQIDPREPEHFARLLGEQEVVDALADASPSDRCGVVHLWSAHSSPAPTLESIQQAQALGSISALHLVQALARAGWRQPPRLWLVTQEVQAIKNPTVSVAQAPVWGFGATVALEMPELQCTLLDLDATPNIDALGQELLSASDEDRIALRGAERHVARL
BGC0000017.1	anaE	M1	ER	M	[Oscillatoria] sp. PCC 6506	Cyanobacteriota	WLILADRTGVAETLADLLKGSGQRSHLVYAKTTDGSSKPEQYAINWTDPADWQKLLASKSYQGVVYLWSLDRNDSCDSSCEQVLHLVQSLTSAKTSPRLWLVTQGAQSALKDDAVAFWQTPIWGLGKTISLEHPEFSTTCLDLPSDRHSPETVKSLLQELLAPDREDQIAYRNGTRYVARL
BGC0000020.1	asmA	M1	ER	MM	Actinosynnema pretiosum subsp. auranticum	Actinomycetes	APVLDRPVLDLPGGDARTLVGLTLEALREHDELTVVTRGAAEDPAAAAVWGLLRTAQTERPGRFAVVDLDDDPASRALLPALPATGEPQVRVRAGRASAPRL
BGC0000020.1	asmA	M2	EDH	M	Actinosynnema pretiosum subsp. auranticum	Actinomycetes	AAEPVPLREVGERVPPVVRVDAGHVRDLLPLLQEVVTEPRWESTRLLVTTSGAVGPRAGRAEGAAVWGLVRSAAAEHPGRFVLADLDDRPESAALLPALATGALPEAVLRAGRVLVPGL
BGC0000020.1	asmB	M3	EDH	MA21	Actinosynnema pretiosum subsp. auranticum	Actinomycetes	TTVVGDSVERVLAALRETLAGDGRLLVLTGDPGAPIGTAVGGAVWGLVRSAQLEEPGRIVLADLDTAPERAGAVLDRVLASGEPQVAIRGGAVLVPRL
BGC0000020.1	asmC	M5	A1KR	MM	Actinosynnema pretiosum subsp. auranticum	Actinomycetes	WLVVGPHPDLLADLLPGAALDPGDADRAALADLLRPHTAVAGVLATPGADVLTLVQALGDAGATAPLWCATTGAVAISPHDGPPDPAQAATWGLGRVVALEHPGRWGGLVDLADPADPRQRRGLAAVLAGPGVDDGGEDQVAIRAQGVFARRL
BGC0000020.1	asmD	M6	EDH	MM	Actinosynnema pretiosum subsp. auranticum	Actinomycetes	TPALTPAATAPRPVLRHDVPAASAEDAVCSTLAVVQGFLADPRHADSVLLVVTRGGEGPDGATAATSAVHGLVRSAQAEEPGRIVLVDTDGSAPDDLITALAAGPEPQLAVRAGRVTAPRL
BGC0000020.1	asmD	M7	0DH-BKR	M	Actinosynnema pretiosum subsp. auranticum	Actinomycetes	APPGPSTALSADLSTALSADLRGVTPAEALDVLQRFAASDAPRLVVRTDRPDDPWQCAVRGLVRSAQAEEPGRILLVVQDGDGPEPPPTTREPEVVVRDGALRVPRL
BGC0000021.1	apoS1	M1	0DH-AKR	M	Nocardiopsis sp. FU40	Actinomycetes	WAVLGELGIEADRYPDLAALVDSGATPDVVFVECRPPAELLAVAQTWLGTARFADSRLVVVTRGAVAAEPDESVRDLAAGASWGLVRSAQSESPGRFVVLDLDDSPASLERLPEVLNLGEPQLAVRAGVVRVPRL
BGC0000021.1	apoS6	M10	B2KR	MM	Nocardiopsis sp. FU40	Actinomycetes	WLAVLPENHGEWTAQLLRGLAAQGAQIRQVVVPHAGQDRATIAERLRAAADEPVAGVLSLLALDERPHPDGPSVPSGLAATVALVQALGDAGLGARMWSVTSGAVAAGTEVLAYPAQAQVWGLGPVARQEHPDRWAGVVDVPESFDDQVLIRLCGVLGTDEAEVAVRSDGAFARRL
BGC0000021.1	apoS7	M11	EDH	MM	Nocardiopsis sp. FU40	Actinomycetes	CAIVGPAGTQFPRYDDFAALARQEELPDVVLVECADERDDVRATVGAALAAIQSWLSEERLADTRLALVTRGAVDGSDLAGAAVWGLVRSAQSEHPGRLVLVDVDGLASYDQLPGALALDEPQLAISDGAVRVPRL
BGC0000021.1	apoS7	M12	EDH	MM	Nocardiopsis sp. FU40	Actinomycetes	WAVLGEPSALADLDVDRYSDLTELAKDDPPELVFAECASGRTAREAANSALTVVQSWLAEERFADSRLVLLTRGAVDGEDLAAAAVWGLVRSAQSEHPGRFVLVDLDGALASRERLPGALALDEPQLAIRDGVVRAPRL
BGC0000021.1	apoS8	M13	EDH	MM	Nocardiopsis sp. FU40	Actinomycetes	WAVVGESAGLLPPLSEVDDVELIRCRDLTALAEGMDVPELALVGIAPSDLLSGDLVAATHAAAADVLSLVQNWVADSRFDGMRLVVVTKNAVAAKAGEGVSDLAGAAVWGLVRSAQSEHPGRLVLVDVDGEAASFGQLPAALELDEPQLAVRDGVVRVPRL
BGC0000021.1	apoS1	M2	B2KR	MM	Nocardiopsis sp. FU40	Actinomycetes	WLVVAPAEHAEWAAVLADGIAGRLVVLGDEPIADKLAEGPVSGVLSLLALDDRPLAEFGAVPRGLAATVRLLRDLTTMDSQTPLWTVTRGAVSVDRFDPHSSSAQAMVWGLGRVAALEHPDRWGGLIDLPDTLDERVLSRLSAVLGGAEDQVAVRASGVFGRRL
BGC0000021.1	apoS1	M3	A1KR	MM	Nocardiopsis sp. FU40	Actinomycetes	WSVLVPSGHEDSELVTAVLAELSAHGAKATPVVLDPTDLDRVALADQLSGVLDAEPPSGVLSLLALSEGRHSRHRVELGLAATALAVQALADAGVKARLWCVTRGAVSTGATDPLPSPEQAQVWGLGRVVALEHPDSWGGLLDLPAAFDQRARDRFASLLGGDQDEVAVRASGTFARRL
BGC0000021.1	apoS2	M4	0DH-CKR	M	Nocardiopsis sp. FU40	Actinomycetes	WAVSGPGHGLLAGIDAERGDLASIAETGPPDVVFTESVPGATASAATASVLDVLRSWLADERFAASRLVVVTRGAVAVEQDAAVADLAGAAVWGLVRSAQAEHPDRFTLLDLDDQVGSLDLLPAALALGEPQLAVRDGVVRVPRL
BGC0000021.1	apoS4	M5	BKR	M	Nocardiopsis sp. FU40	Actinomycetes	WLVVLPSRLPADGWPDALAKELTGRGAQVRTVTLSGGEDRETIAARLTESAADAPVHGIVSLLALDETPLPGLPSVPDGLAATLGLAQAAGKIAGEPRIWCVTTDAVTVGRPDRVGNPVQAQVWGLGRVVALEHAERWGGLVDLPPAVDARAVARFADVVAGAGDEDQLAVRESGVFVRRF
BGC0000021.1	apoS5	M6	AKR	M	Nocardiopsis sp. FU40	Actinomycetes	WLVVVPDGHAPWASALRGRRLAVSATDTPETLADQVRQALSEGPVTGVLSLLALDEHPLPGYPEVPAGLAATVALAQALTTIGSDTRLWAVTQGAVSAGRGDTVSSTAQAAVWGLGRVAALEYPQLWGGLVDLPARVDEPVLAYLNAVLSGDEDQVAIRAEGAFGRRL
BGC0000021.1	apoS5	M7	ER	M	Nocardiopsis sp. FU40	Actinomycetes	WAVLGELTLEIEANRYPDLAALGDRAPEVVFASGASPAQTLALVQEWLGEERLAGSRLVVVTRGAVAVEPHADVPDPAAAAVWGLVRSAQAEHPGRFVLLDLDDSAASLDRLSAALTSDEPQLALRDGVARALRL
BGC0000021.1	apoS5	M8	EDH	MM	Nocardiopsis sp. FU40	Actinomycetes	LAVLGEQIGRLKGLFGLSGVEVVHCADVTALAEIPDFVLVDCSATSAHTAVREALALVQAWLADERLSAARLVFVTRGTADDLAGAAVSGLIRSAQSEHPGRFVLLDLDDDDASLRKLPAALAHDEPRLALRGGGIQAPRL
BGC0000021.1	apoS6	M9	EDH	M	Nocardiopsis sp. FU40	Actinomycetes	PSWAALGAGDGLAGLEISDRYPDLASLAEADVPDTVLLECVSAAANTELASEVLRSVQSWLASARFADSRLVVVTRGAVATDPAEDVPDLAAAAVWGLLRSAQAEHPGRFVLLDLDRGDASYRAVPAALASDEPQLAVRDGEVRVPRL
BGC0000028.1	BafAI	M1	B1KR	MM	Streptomyces lohii	Actinomycetes	WLALRPESDDAAAVLDALGEAGADLLPCVVDDPGATRGQLAALLTEITETAGDQPIAGVLSLLSWEERPHPDHPDLPGGPALTLALAQALEDTGIDARLWTLTKGTAVLGGAERPGHVGQAASAALGRTLALEHPHRPGGLVDLPEVLDVRAARRLCAVLAGAVADEEQVAVRSTGVHGRRL
BGC0000028.1	BafAIV	M10	EDH	MM	Streptomyces lohii	Actinomycetes	WAVLGGRAPLADAESHPDLAALGAALDGGAPPPAAVLAWCDPAPHPLSPPDAASVHTALDDALRLVQEWLADPRWDDGTRLVLVTRGAVSTAAGEEVTDLTGAAVRGLVRSAQSEHPDRFLLIDTDDPAAVTGLLPRALAGTEPQLAIRAGQLLAPRL
BGC0000028.1	BafAV	M11	EDH	MA21	Streptomyces lohii	Actinomycetes	WGLLGPRDERLLAGFPAEPLSATPDAMLLVCPPSAGTGTGAWAGEPGDAPARDADPEAVHTVVSGVLDRLQAHLADDSTARTPLVVLTRGATGPLGARPADLGAAAVRGMVSAAQLEHPDRFVLLDIDGPDPDGLGGALADLLATGEPRAALRGGVLYAPRL
BGC0000028.1	BafAI	M2	AKR	M	Streptomyces lohii	Actinomycetes	WLLVTPDGPGAEDTVLACEQALAGHGADVVVMRVGAAVGRAELALMLPEFGTLTGVLSLLALAEDPHPGPQTPDACLTGTLLLLQALGDSGIDSPLWCATRGAVAADGTEEVRPGQAQVWGLGRVAALEHPLRWGGLVDLPDPLDGPALDGLCAVLAGRDGEDQVAVRAPVPLGRRL
BGC0000028.1	BafAII	M4	A2KR	MM	Streptomyces lohii	Actinomycetes	WLVLSSGGQSEGGERRSEATVYVMEQAGASVVHVRLTEAEADRAVLADRLRASLDALPGPVTGVLSLLGLDERPHSAHPSVPLGTALNLALVQSLGDAEVDAPLWWATRGAVSVGGTDTGSPVSAAQSLLWGLGRVAALEFPQRWGGLIDLPEVLDADTAPRLCRVLAGAAGDEDQVAVRAGGCHGRRL
BGC0000028.1	BafAII	M5	B1KR	MA21	Streptomyces lohii	Actinomycetes	WLVVAPAGTADDPAVTFALDSLRGHGATPVLVEAGPDATDRTRFAALLRDAHDRTDGPPAGLLSLLALAEEPHGGGSALPRGLTLTAALLQALGDLGTDAPLWCATRGAVSVGRSDRIGSTLQALVWGLGGVAAVEYPQRWAGLVDLPRRLDDRAATRLAGALTGPDGEDQLAVRATGLYGRRV
BGC0000028.1	BafAII	M6	EDH	M	Streptomyces lohii	Actinomycetes	WTVLGTGTPLPGAAPLPGRTVTDLAALSALLDAGEQPPRLVLAACPPGPVPHAPPGALRDAVHDGLGAVLALLRGWLADERLTGSQLVLVTAGAVPVTGDDVPDPALAALWGLVRSAQTENPDRFVLLDLDARETPPAVLAGALVSGEPQLAIRAGTVHTARL
BGC0000028.1	BafAIII	M7	EDH	MM	Streptomyces lohii	Actinomycetes	TTDLATLQAAVDAGAPVPGTVLLVRGEPDAAGPAAAVRTAVHQALTDAQTWLADDRFAGARLVFATRGAVSAGRAGEGEDVRNPAHSALWGLVRSARSEHPGRFALLDLDADDEHGTFPGVAAALASGEPESAVRGDDVRVPRL
BGC0000028.1	BafAIII	M8	ER	MM	Streptomyces lohii	Actinomycetes	WGALGGAVPGTVSWPDLDALGAALGAGAALPEVVVAAVATADLPDAADRVRATAHRGLALVQEWLADERFAGARLVLLTRDAVRTGPVDRPVDPAQAALWGLVRSARAEHPGRFVLVDAAGTAEAADLLPAALAAGEPELALRTGPPLLPRL
BGC0000028.1	BafAIV	M9	A2KR	MM	Streptomyces lohii	Actinomycetes	WLVVLPAGHDDARVRGPLLALTEAGATIVTAEVTADAVHRTDLADTLATALGGLVPTGVLSLLAAADRPHPDHPALPTGTALTVALVQALGDLGLTAPLWCATTGAVSTGPDDPVTRPRQALVWGTGLVAALELSARWGGLIDLPPELDARARTRLAAVLTASVPGTSGDGTGGVGTGVLGTGGPGTSGGPGREDQLALRPTGILARRL
BGC0000029.1	becA	M1	EDH	M	Streptomyces sp. DSM 21069	Actinomycetes	WAVVGDTRDPRVAAVLASLGAAAESYPDAEALRASLRAGAVRPSTIVARFATGTAEDGADPVAAAHTGTRHAMHLLQAVLADGAPDSRLVILTENARYTGTGDAAADMAGAAVWGLIRSAQSEHPDRFTLLDVDGSRASDEAVVAALSAGEPQLAVREGRLFVPRL
BGC0000029.1	becF	M10	EDH	M	Streptomyces sp. DSM 21069	Actinomycetes	WRTEGDDVLSTLHPLLKAIQAETETLAVVTRGAVSVAGERVSDLAGASAWGLVRSAQSEDPGRFVLVDVAGEDEKADIALALAAGEPQVAVRDGKVYVPRL
BGC0000029.1	becG	M11	EDH	M	Streptomyces sp. DSM 21069	Actinomycetes	TELAELSGPVPSTVAWTPPAGTGRIADDVRTVTAQTLRTLQTWLTDERFAGSRLLVVTRGDDLAHASAWGLVRAARSEDPERFALLDTDGDDPETIGRAVASGEPDLRVRGQEILVPRL
BGC0000029.1	becA	M2	EDH	M	Streptomyces sp. DSM 21069	Actinomycetes	WAVVADPGNTQVAAALSPLGAAVEVEPDAVTLPTTPGDDTTRPDVVFTWCVSEPGADPAQAARSFTHRVLGLVQAVLSDDRPDSRLVILTKGAMSAGSGGAADLAGAAVWGLIRTAQTEHPDRFILMDLDGSDASLRAVGAALNAGEPQLAVRDGRLLAPRL
BGC0000029.1	becAC	M3	CKR	M	Streptomyces sp. DSM 21069	Actinomycetes	YLLHPALLDTALQAALVPDIDRDDRTFLPFALRGIRVHKGGARAVRIHTVPGDDGFSLALTGDDGEPIATIGSVVSRPVTAEQLDAAAQRTQLLRVVWKSVVQQSDNSDQQRWGFLGTDRIGLTGALKATRPLFDSYPTLRELDSVLRAATAVPDVIVVSCTDEDSPVRSAAQRALMVVQECLADHRLAKTRLVLVSSGAVAARAGEDLSDVSGAAVWGLLRSVQSEHPDRFVLVDVDDPGNSGRSLAAAVASGEPQLAVRNGALLRPRL
BGC0000029.1	becB	M4	EDH	M	Streptomyces sp. DSM 21069	Actinomycetes	EPDAASHEFQLAYVPETFPGEPADAARAATLHALTLIQDALRDDTRLAIVTRGEPYDFTLASPWALVRSAQAENPGRFVLVGTDHDVPEHELRAALATGEPQLALRDGKVLVPRL
BGC0000029.1	becB	M5	EDH	MM	Streptomyces sp. DSM 21069	Actinomycetes	PRTVVHHCTGGTTAASAHAETATTLAVLQSWLESGADDAVLAVVTRGALSVNGEDVTDLAGAAVWGLVRSAQTENPGRVVLIDLDAVDDRADHTDADIDAAVATGEAQIAIRSGTLHRPRL
BGC0000029.1	becD	M6	EDH	M	Streptomyces sp. DSM 21069	Actinomycetes	VRSPAENTEVSVHHCPPTTGGTPAAVRAVTTGVLAAVQGAVDGGTALVVVTDGATDGSDLGHAAAWGLVRAAEGEHPGRFFLVDTDAPVDPARVVAIGEPELRVSGGETRVPRL
BGC0000029.1	becD	M7	EDH	M	Streptomyces sp. DSM 21069	Actinomycetes	YEVPRAEGDTSEAAHAVADEVLARVQEWLADKGRSDEKLAVVTRRAVPIEGEDVDLSQAPVWGLVRAAAAENPGRFLLLDLGDGATVPPFVDAPEVAVRGGELLVPAL
BGC0000029.1	becE	M8	0DH-BKR	M	Streptomyces sp. DSM 21069	Actinomycetes	PVGSETGAHVVYECPPLDEPAPEGFRTITHQVLPVIQRWLDDEQAASAKLVVVTRGATDGSDLGHAAVWGLVRSAESEHPGRFVLVDLDAEAELPDEVLRLAEPEIAVRDGEIRVARL
BGC0000029.1	becF	M9	EDH	MM	Streptomyces sp. DSM 21069	Actinomycetes	EEVFRLPGGLDVRAAVNLALEALQSAGSRLVVVTRGAVSVNGGDVDDLAAAAVWGLVRTAQTEDPGRFFLIDLDGDTDEAPSADNADLAPALSTGEPRVVVRDGVAHVPRL
BGC0000031.1	borA2	M1	BKR	M	Streptomyces parvulus	Actinomycetes	WLLLVPESDGTEPWVEGAEKMLAERGCEVVHVPIAATADRDAMVGAVRESVEDGRVDGVLSLLALDGRPHPDAAAVPTGLVATAQVVQVSDELGIGPLWVATRQAVSVDGADEADGAGRTRKADDPADVAQAAVWGLGRVAALEKPRLWGGLVDLPARADERMRDLVAQALTAPDAEDQLAVRADGIAVRRL
BGC0000031.1	borA3	M2	EDH	M	Streptomyces parvulus	Actinomycetes	WVSAPAANGPGLRLARAATVEAALAADADIVVVPCLDSEGPHQATYQALELLQRWLAADTGTTTLALLTHRAVAVGDDVHDLHHAPLWGLVRTAQTEHPGCFRLVDSDDPDPTTDVLAAALATGEPQVAIRDGAVLAPRL
BGC0000031.1	borA3	M3	EDH	MM	Streptomyces parvulus	Actinomycetes	WAVIGADPAGYAAALEATGAQVTTAADLAGLTSAPEAALFTLPGTKDAGVTEEVPTAVREATAQVLEVLQDWLTDGRFDDARLVVVSREAEDGDLLHGTARGLLRAAQAEHPDRITLVDLDAHPASLTALPGFALGPEPEVVVRAGDGRAPRL
BGC0000031.1	borA4	M4	A1KR	MM	Streptomyces parvulus	Actinomycetes	WAVVVPAGHEDDPVVDWVCSALRDHGGEPERMVLGPRESRSALATRLAADPPGGVVSLLGLSGAAHPDHEVLPSAVAGTVLLAQALSDGAVRAPVWTLTRNGVSATATDPVAPTHAAQVWAVARVAGLEHPEAWGGLLDLPDRLDDRAAARFAAVLSAGEDEDQLALRDAGLLARRL
BGC0000031.1	borA6	M6	BKR	M	Streptomyces parvulus	Actinomycetes	WLLVRPEEGPRPLADAVADALTRHGASVVEAARVPHQSDTELTGVVSLLGPGADGDGGLDATLRLVQDLATAGSTAPLWIVTSGAVAVGTSDTVPNPEQATLWGLARAAATEWPGLGAARIDLPADLTEQVGRRLCARLLDRSEQETAVRQAGVFARRL
BGC0000032.1	SchA1	M2	B2KR	MM	Streptomyces chartreusis NRRL 3882	Actinomycetes	WLVVVPRHLADDELVVGSLKALTRYGAAPVPLLVDTRDGDRGGLTELLRSDADSLTEGGEVAGVLSFLPLDESPHPRHPVVPAGLLATVELVRALDAAPFPARLWSVTNGAFSVAPDEVPAHPVQAHVWGLSRAAGLENPQCLAGMVDLPPVFDDRAAALLCGVLADPGDEDQVAVRGTQVLLRRL
BGC0000032.1	SchA2	M3	ER	MM	Streptomyces chartreusis NRRL 3882	Actinomycetes	TIVWRPQDSGEADTWGLPAVTDLEDVPASVQVVVLPVSGRDRDVTEVSTAVLAALQAWLAEDRLARARLAVVTRGAVAVDTGVGPDAGADVVDLAASGVWGMVRTAQSEHPDRFTLLDLDPHQHADTNALLGALSVSGEPQLAWRDGQLHAPRL
BGC0000032.1	SchA5	M4	0DH-CKR	M	Streptomyces chartreusis NRRL 3882	Actinomycetes	RSVPGPTDTAEAPAPAGGTVVLPALDGGATELPFMDSDSAGAAGQDAGIVVLPVLGGTAGDGDTEPATGAVAERLLVALQRWLADERNAARRLAVVTHGAVAAGEDTEGIRPDVTDLAASVAWGMMRTAQSEHPDRFLLLDLDVDPKSAGSDLADLVTRAARTGEPQLALRGETFLAPRL
BGC0000032.1	SchA5	M5	ER	MM	Streptomyces chartreusis NRRL 3882	Actinomycetes	TIVWRPQDSGEADTWGLPAVTDLEDVPASVQVVVLPVSGRDRDVTEVSTAVLAALQAWLAEDRLARARLAVVTRGAVAVDTGVGPDAGADVVDLAASGIWGMVRTAQSEHPDRFTLLDLDPHQHADTDALLKALSVSGEPQLAWRDGQLHAPRL
BGC0000032.1	SchA4	M6	AKR	M	Streptomyces chartreusis NRRL 3882	Actinomycetes	WLVVVPAGLDDAEPVSGCVRAITRHGGEVRRLAVDAGSGEARDALRAALRDAATGTPEIAGVVSLLGLCEAPVPAHPELPAGVAGTVLLIQTLAETGIDARLWSVTSGAVRATDDDGPVRPEQAPVWGLSRVAALEEPKRWAGLIDVPPALDDRAGERLAAALAGIGDEDQVAVRGDGVLARRL
BGC0000034.1	fscC	M10	EDH	M	Streptomyces sp. FR-008	Actinomycetes	VAVLGPDTALLGGGDLLAEAGTEGVTGLADLVTGTGPGEDVPSVVLLPVATAPEAGSGTGDVAAAAHAATARVLETLRDWSAQERFAASRLVVVTRGASDGADPAAAAVWGLVRAAQAENPGRFILLDLEPSATSPLGMSALRAALASGEPQLALREDRLLAPRL
BGC0000034.1	fscD	M11	EDH	M	Streptomyces sp. FR-008	Actinomycetes	VGLLGPDPLRLGAALTAAGVTVGPLTEAAGPDTPALVLVPVGGGDPEAVPAEVHASTARVLGHIQRWLAEDTRAGARLVFVTRGAVAVGEGPLTDPAAAAVWGLVRSAQAEHPHRFGLLDLDPVAGTDPAALVAALAAEEPQTALRGDTVFAARL
BGC0000034.1	fscD	M12	AKR	M	Streptomyces sp. FR-008	Actinomycetes	WLAVTTEDDGAADTVLAALRGHGAVVERLVLDASHLDRDLLTTTLRDAVENATAEGAAGVRGILSLLPLADAARPEATGTDAPAGGLPAGFALGVVLAQALGDAAVTAPLWTVTRGAVSTGPGDPLTHPARAAAWGLGRVAALERPEQWSGLVDLPEVLDAPATQRLVSLLATRDGEDQLAVRAGGTLARRV
BGC0000034.1	fscD	M13	A2KR	MM	Streptomyces sp. FR-008	Actinomycetes	WLLVTAEGTDPEYAAAVAEQLTAHGARTVPLALTGADADRAALTERLRDLPEPAAVVSLLADDESTGAAHPVLTTGLALSVTLTQALGDAGIEAPLWALTRGAVSTGRADRLTRPAQALVQGFGWTAALEHPDRWGGTVDLPETLDRRAGERLAAVLAGTTGEDQLAVRASGVLARR
BGC0000034.1	fscD	M14	BKR	M	Streptomyces sp. FR-008	Actinomycetes	WLVLRPTGTAAPETAALLDTLGLDTAEVTVDLAAPDRAALADTLRRLPRPEDGFTGVLALPALDTAATADDVAGTGAVAPTAAALNALDDAGITAPLWIVTRQAVSTGRADRLARPGQAGVWGLGRVAALENPGRRLALVDLPEQFDTRVARRLAHLLAVPGTENQLAVRASATYARRI
BGC0000034.1	fscD	M15	CKR	M	Streptomyces sp. FR-008	Actinomycetes	WLVLTLAGHDDAWTQALAATFGEHTVHLAVPADEDGTAALLDGAADGTAYAGVLSLLAGTATDGTARPDTLLRLLAAAGIDAPLWCVTRDAVSVGRSDPAADPDRAALWGLGRVLALDEPERWGGLVDVDHVADARTVDRLRAVLTVARTDGPAEDQVALRASGAFGRRL
BGC0000034.1	fscD	M16	BKR	M	Streptomyces sp. FR-008	Actinomycetes	WLAVVPADHADHPWTSAVLAALGAGAQVLEVSGKDRAGLAAAIRERLDATGPFTGVVSLLAVAGEPGDGTGALPGGVPAGAALTATLVQALGDARTDAPLWCLTRGAAAVSPAETVAAPLQAAVHGLGRVAALEHPQRWGGTVDLPLAVDARTAERLAAVLADPEGEDQLAVRPGAVFGRRL
BGC0000034.1	fscE	M17	0ER-0DH-BKR	M	Streptomyces sp. FR-008	Actinomycetes	AVTLGTDRAWPGPLASLADAAAVTPAPDLVLVPLEGVEDDTPTAVHAATARTLALIQEWLEPATSAAGRLVFVTRGAVATGTDTGVSDLAAAAVHGLVRSAEAENPGRFALLDLDAGTAAPSGELLAQLPPLLAAGDTQFAVRDEAVLVARL
BGC0000034.1	fscE	M18	ER	M	Streptomyces sp. FR-008	Actinomycetes	HTTAGALGTGGAAATLAPLTGEEDLVLVEVPAPAEGADVPAATHERAAQALALAQEWLADERFADTRLVFVTRGAVCARPGERVDDLPAAAVWGLVRAAQSENPTRFALLDLDDTTPVETALPQLLGPLSGGDAQFVVREGAVLVGRL
BGC0000034.1	fscE	M19	CKR	M	Streptomyces sp. FR-008	Actinomycetes	WLAVVPAAYGEDPWTAAVLDAVGTDVVRLTVDTVERHALADRLRALSADGAALAGVVSLLALADTPEAAVSGDPAGAPAAPTAVLFQALLDAGVDAPLWCLTRGAVAVAGSEAVTAPAQAAVWGLGRVAALEHPAVWGGLVDLPSAWDERAARRFAAVLAGHDGEDQVAVRSSAAFARRL
BGC0000034.1	fscB	M2	A1KR	MM	Streptomyces sp. FR-008	Actinomycetes	WPALVPAGHADDPWVHAVLGALTGRGLRVERHDLTGDEDTAALTALLTGTGDTEPDGAEGIAGVLSLLALDERPHPDHPAVPRGLATAKELLHALSGTEASVWALTRGAVAVDSRDRLTSPVQAETWGFGRAVALELPDAWGGLADLPADPDARSLARLATLLGGPEDQIAVRSSGAYARRL
BGC0000034.1	fscE	M20	ER	M	Streptomyces sp. FR-008	Actinomycetes	AATLGEDVFGVGTALASLTELTGPDADPSAAPDFVLVPLAGAGDAAGAGDPDAHGADVPAAVHALTTRTLDLLQQWQAAERLGHSRLVFVTTGAVAAHDTETVRDLAAGAAWGLVRSAQSENPDRFVLLDLDGADAPDTLRALLPDLPGLLGSGDAQFAVREGTALVGRL
BGC0000034.1	fscF	M21	0DH-BKR	M	Streptomyces sp. FR-008	Actinomycetes	RVALGTDPFGTGTVLAGLDEVTETGTQVLVPVPDGGEDPVTATHEATRATLALLQEWLDGPRPAGARLVFVARGVVAARPGDPAANLAGAAVWGMVRTAQAEHPADFTLVDVEPGAPFPLEAVLAVDEPQAAVRDGQVLVGRL
BGC0000034.1	fscB	M3	ER	MM	Streptomyces sp. FR-008	Actinomycetes	WAVLGTPADPVTAPDGSGTTLPAFATPGALAEHTEANGHRPDAVLLFAGAAASGTAAAPDAEPGVPDAVLDDVLATVQSWLADETTEGVPLVVVTRGAVPTGPADPAHDLPGAAVWGLVRSAQSQHPGRLVLVDLDIHDDSWLALPAALAAGEPQLALRQGAAYAPRL
BGC0000034.1	fscB	M4	0DH-B1KR	MM	Streptomyces sp. FR-008	Actinomycetes	WAVIGAPGRLTAALERSGATVQLHPDLAALTTALDNDEAAPPALVVAFHGHDSGEDPTKAAHTSAARALTLSTAWLREPRLADARLLLVTEGAVATGPDDTVPGLADATAWGLLRSAQTEHPGRFLLADLDPAPGDTDEDSAADALIAAAAAAARTGEHQFAVRAGTVTVPRL
BGC0000034.1	fscC	M5	EDH	M	Streptomyces sp. FR-008	Actinomycetes	VGVLGDSDASTALAGVLRADGLSDGGFVAFPDLEDLAAAEEVPATVLVRVRPDAATRPDAVVDAVHALAARGLELVREWLAQERFTDSRLVFVTSDAVDGGDLADAALRGLVRSAVSEHPGRFGLMEVGRGTDTATVLAAVATGEPETAARDGEVLAPRL
BGC0000034.1	fscC	M6	EDH	M	Streptomyces sp. FR-008	Actinomycetes	VVLLGEGLADLAGDGAAVRADLQELAAAEAVPETVVVAVPPAPDTEGVVGSAHASAAWALALVKEWLAQERFAGSRLVFITRGGHVTEPASALTSAPVRGLVRSVALEHPGRFGLLHLPAGTDAGRLFAALAVDEPETAVLDSEVCVPRL
BGC0000034.1	fscC	M7	EDH	M	Streptomyces sp. FR-008	Actinomycetes	VAVLGEARSAVPAADDFVTYATLEELAAAEEMPSTVLVAASDDADGTDPAQAAHTAAARALALVRSWLAEDRFAGSRLVFVTASTDRTTGLADAAARGLVRSAISEHPGRFGLLELPADADTASLRSALASGEAESVVRDGEVRVPRL
BGC0000034.1	fscC	M8	ZDH	M	Streptomyces sp. FR-008	Actinomycetes	SWAEALEADTTAPGAVVLEVREPAGPDVPAAVRAVLDQVLPAIQQWLRDERFTSSRLVVVTRGAAPAGSSADVVQAPVWGLVRAALAENPGRFALADVSVDADDAAVDRAVAAALSGEAEVAVRDGVVLVPRL
BGC0000034.1	fscC	M9	ZDH	M	Streptomyces sp. FR-008	Actinomycetes	TWSRVEEAGTEVPAVVVLDASAPAGADVPGSVRSALDGVLTVAQRWLTEERFAASRLVVVTRGAMPVGSGGAPAEGDVVQAPVWGLVRAALAENPGRFALADVAVDADDAAVDCAVAAVLSGEAEVAVRDGVVLVPRL
BGC0000035.1	chmGI	M1	B1KR	MM	Streptomyces bikiniensis	Actinomycetes	WLLVVPETLDADGTRIAHDLQHALTTHGATVSRVSVDVTTIDRADLSARLTTSAAEDQEPLGRVVSLLGWAEGVRAHGPNVPTSVAASLALVQAVGDAGFGVPVWAVTRGAVSVVPGEVPETAGAQLWALGRVAGLELPDRWGGLIDLPADADARTAGLAVRALAAGIADGEDQVAVRPSGAYGRRV
BGC0000035.1	chmGI	M2	EDH	M	Streptomyces bikiniensis	Actinomycetes	WAVVGQGGVAARYATAEPGTGCVGVFPDLDALRTTLDSGADGPDIVLADFGARPGDAAPHGTDPADGARDTVRRGLALIQGWLSDERFAAARLAVLTEHAVATEADTRRTDLAGSALWGLMRSAQTEHPDRFVLVDHDGQDASYRTLPTALDSEIPQLALRAGETLAPEL
BGC0000035.1	chmGII	M3	EDH	M	Streptomyces bikiniensis	Actinomycetes	WGVLGDPVQALLDAVRDGAEAPVRTHDDLLALAASDTAPPDHVLALLGHDGDALATGAHDLAARALALVQGWLTHARFADARLVVLTQGAVTAGTSPVHPAAAAAWGLLRSAQSEHPGRFVLVDADPADPAASYRSLPRAVASGASQLALRGAEILVPRL
BGC0000035.1	chmGIII	M5	ER	MM	Streptomyces bikiniensis	Actinomycetes	WIVVGGEDEGLGLGGLRLDGPRLDGPGLAEALSEAGMGTERHRNLADALSAVRTPVDTAGSAAAAGTTSLIAVPVPQSPTMDAGAVRHAVHRALELVQGWVAADEAAEEGGSDGAAADRRLVLVTSGAVSTGDADPLRDPVAAAVWGLIKSAQSEQPGRIVLVDLDEGAVDGAALAAAISTGEPQLALRDGDVHVPRL
BGC0000035.1	chmGIV	M6	A1KR	MM	Streptomyces bikiniensis	Actinomycetes	WLLVVPETLDADGTRIAHDIQHALTTHGATVSRLTVDVTTTDRADLSARLTTTAAEDQGPLRGVLSLLSTDERQHPDHPGVDRATAGTMLLAQACGDLVVARGVEPRLWVVTRGAVAVSPAERPSSAGAQVWGLGRCAALELPTRWGGMVDLPPAARDAGRHVRRLVRLLSETCAEDQVALRASGAYGRRL
BGC0000040	ConA	M1	EDH	M	Streptomyces neyagawaensis ATCC 27449	Actinomycetes	WAVVGDAADAARMAETPTAAGADVRTHPDLPALAEDIDRTADVPAVVLAPLTGSSPDGTDTARAAGRALALAQGWLADERFAASRLVVVTRGAVAAGPDEDVSDLAHSAVWGLVRSAQTEHPDRITLLDLDDEPASRRVVAAAFAAAEASGEAQLAVRAGRVLVPRM
BGC0000040	ConE	M10	A2KR	MA3	Streptomyces neyagawaensis ATCC 27449	Actinomycetes	WPVLVPDGHTADAAVTRAVEALRERGANPELVVLDHTHTDRSRLTDHLRELLATGPGTETAPSGVLSLLALDERPHEGLPALPVGLALTTALVQALDDLDVRTTLWCATSGAVPVHPSEPVPHPVQALVWGFGRTAALEHPSLWGGLIDLPEQCDERAGHLLGDLLAGAGDEDQLAIRASGAHARRL
BGC0000040	ConE	M11	A2KR	MM	Streptomyces neyagawaensis ATCC 27449	Actinomycetes	WLVVLPEGHDDAPGAPLARDSVTALTEAGADVVTVRLTDADADRATLGERLTTALEGRTPQGVLSLLAIAGRPHPDHPAVSAGSALTLVLVQALGDLGVEAPLWCATHGAVTTGDTDTLSAPDQALIWGTGMVAALEHPTRWGGLVDLPPSLNSLSRDRLRAILAGATGEDQLAVRSVGLLGRRL
BGC0000040	ConE	M12	EDH	MM	Streptomyces neyagawaensis ATCC 27449	Actinomycetes	WAALGTEHLLPETHENLDALTAAVDGDAAVPDVVVTLCPPGGNSADAARTALAATLRLLQTWLADDRWADTRLVLVTRGGVATARGEDIGDLAAAAVWGLVRSAQSEHPDRFVLVDAEDPAEALKALPAALSATEPQLAVRDGRTLAPRL
BGC0000040	ConF	M13	EDH	MA21	Streptomyces neyagawaensis ATCC 27449	Actinomycetes	WATLGACDGDLLPAGFRADRCPDLTDVPATSDAVLVLCPPAGTPGPEGARTSVEAVLALLQRWLAEPKFTETPLVLLTRGAVDLDGAPADLGGAAGLGLLRTAQLEHPGRFVLLDTDGGDGLEAALAHALAEGEPQLALRDGTLYAPRL
BGC0000040	ConB	M2	B1KR	MM	Streptomyces neyagawaensis ATCC 27449	Actinomycetes	WLVVLPATDSGADVLAALTAAGAEPVPVVVSAPDQDRESLATSLRAASGAEPVAGVFSLLAEETHPHPAQPDVPAGLSLTLALVQALGDTGTDAPLWCATRALAAVGGGERPGAGAQAAVAGLGRTVALERPDTWGGLVDLPAVLDERAADRLGAVLATVTDEDQVAVRSSGVYGRRL
BGC0000040	ConB	M3	AKR	M	Streptomyces neyagawaensis ATCC 27449	Actinomycetes	WLLAVPDDPAVTETAEAVERALTEHGAETTVVRIGAGTGRAELAGQLPAGATGVLSLLALTDLPHPDHAPLGAGLALTLTLLQALGDTGSRARLWCVTSGAVGAGQDTPPSPAQARVWGLGRVAALEHPDRWGGLVDLPERLDPAALRGLCACLGGVAGVDAGHGDGTTDGLAGEDQIAVRPSGLLGRRL
BGC0000040	ConC	M5	A2KR	MM	Streptomyces neyagawaensis ATCC 27449	Actinomycetes	WLVAVTDGTEGDPAREAAVRALREAGAVPVPVVLTEAHTDRATLTAHLSEASTGPVHGVLSLVALDERPHPSHPHLPLGLALTLTLVQALGDAGVTAPLWCATRGAVTTGRDDAVTSPGQHMVWGLGRCAALEHPQRWGGLVDLPDTLDERAAARLCGILAGRDDEDQVAVRPSGAYGRRL
BGC0000040	ConC	M6	B1KR	MA21	Streptomyces neyagawaensis ATCC 27449	Actinomycetes	WWVVVPADAATHPMVTGALRALERHGALAVPVEIGAADNDRAALAARLGAAAAPDGGVLSLLALAEQPYTDGTALPTGLALTTTLLQALGDAGINAPLWSVTCGAVSVGRSDALTAPAQATLWGLGAVAGVEYPERWAGLVDLPADLDDRSGGRLAAVLAGLDGEDQVAIRPSGIYGRRL
BGC0000040	ConC	M7	EDH	M	Streptomyces neyagawaensis ATCC 27449	Actinomycetes	WAVIGPEAPDWAAHGITRSATGLEALSREIAGEAGGVAPPTVVLAHVPAAPAGLGQPDAVRHVTGHTLTLVQEWLADDTFADAKLVLVTRGGVPVSADGVAQDLAHAAVWGLVRSAQTENPGRFVLADLDDASEDALVAAVASGEPQLALREGRTHIARL
BGC0000040	ConD	M8	EDH	MM	Streptomyces neyagawaensis ATCC 27449	Actinomycetes	WAVLGPTEDTPGVAHHADLAALRDTDGPLPEFVLADLGAAPDDRADELADTTRTAVHDALALVQDWLADDRFTGARLVLVTRGAIAARPGEDVPNLPHSAVWGLVRSAQTEHPDRLHLVDLDPDADLPAALAAVLTATGETQFAVRGSEVLVPRL
BGC0000040	ConD	M9	ER	MM	Streptomyces neyagawaensis ATCC 27449	Actinomycetes	LTGWADLDDTGSGAQPTAVVWTCPTATGPDEAARVRDTATATLAVVQRWPSDPRSGDAPLVVVTRHAVATGPGGHPADPAQAAAWGLVRAAQTEHPDRFVLLDLDDTADSADALPHLLGLALATREPQLAARAGNPLVPRL
BGC0000042.1	cmiP4	M1	ER	M	Streptomyces sp. MJ635-86F5	Actinomycetes	WAVLADVAQPSPRPEAESRPDFATLAAAVGAAVPDLVFAPVTARSDEAAPTRAHRAARQVLDLIQAWLADDRFTAARLVLVTRGALAVAAPEEVSDPAAAAVWGLVRSAQAEHPGRFVLVDVDVDQHEPAGGESFARLATALGTASASGEDQIAVRAGGTFVPRL
BGC0000042.1	cmiP7	M10	EDH	MM	Streptomyces sp. MJ635-86F5	Actinomycetes	WEALEPGDGVPDVVVLRCGGGGDPEAVRAETGRVLGVLRSWSGEERFAGSRLVVVTEGAVGLPGEAVPDLAGAAVWGLVRSAQSEEPGRMVLVDVDAGADFAVGAVLGSGEPQVVVRDGVVRAARL
BGC0000042.1	cmiP7	M11	EDH	M	Streptomyces sp. MJ635-86F5	Actinomycetes	WEALEPAGGVPDVVVLRCGGGGDPEAVRAETGRVLGVLRSWSGEERFAGSRLVVVTEGAVGLPGEAVPDLAGAAVWGLVRSAQSEEPGRMVLVDVDAGADFAVGAVLGSGEPQVVVRDGVVRAARL
BGC0000042.1	cmiP6	M12	EDH	M	Streptomyces sp. MJ635-86F5	Actinomycetes	WEALEPGEGVPDVVVLRCGGGSDPGVVRGELYRVLGVLRSWSVEERFAGSRLVVVTEGAVGLPGEAVPDLAGAAVWGLVRSAQSEEPGRMVLVDVDAGADVAVAAVLGSGEPQVVVRDGVLYAARL
BGC0000042.1	cmiP4	M2	ER	M	Streptomyces sp. MJ635-86F5	Actinomycetes	GEVPDASDAHVPDVVVLRCPEAGLHEAAVWALERVQAWLAEERDARLAIVTRGATTGADLAAAAVWGLVRSAQTENPERIVLIDEADEIADDAVPALVSLGEPQLRLRGGEAFAPRI
BGC0000042.1	cmiP1	M5	ER	M	Streptomyces sp. MJ635-86F5	Actinomycetes	VAWVGGQEPSDTVARFADQAALCAAVAAEGADTPQIVVLDIGHAGHTPLGDGADVPGRVRETTGKVLEAVQLWLADERFAPSRLAVLTRGAQALDGEDVTDLAAAAVWGLVQAAQSEEPGRLVLVDAEADADVSAEAVARLVAMDEPRLVLRGGQAYAARL
BGC0000050.1	ORF3	M1	EDH	MM	Streptomyces aculeolatus NRRL 18422	Actinomycetes	PGPERADHVDIADLADLSVLPVPVPEFAVIRPAAVPADAAPDAAAIRASVARALELVQGWLGDERFDGSRLVFVTGGAVAVDPRDRVADLAGAALWGLLRSAESEFPGRFAVVDTDDDPASAAALPAALATGEAQLALRAGRLTVPRL
BGC0000050.1	ORF4	M3	EDH	M	Streptomyces aculeolatus NRRL 18422	Actinomycetes	ENGADGAEFTEVAGIADVAALPEVPGTVVLPFGEAADATAALHRALDAARTWLADDRAAAAGSRLVVLTRRAVAAGPGDVPDPATAPVWGLLRSAQSEAPGRFVLVDADDDAAAERDRTVRRALACGEPQVAVRAGRLTAPRL
BGC0000050.1	ORF4	M4	EDH	M	Streptomyces aculeolatus NRRL 18422	Actinomycetes	RAPAESDDLPLLVVADAEDAEDAQAAHADAAGSARAVLLRTLSALQTWLADEQNADRRLTVVTRNAVALGDESPNLSHAPVWGLARSAQEEHPDRLVLVDTDDSEESRRALPAAVASGEPQLALRGGALGVPRL
BGC0000050.1	ORF5	M5	ER	M	Streptomyces aculeolatus NRRL 18422	Actinomycetes	WAVLTTGGTGDLLAALPAARSVTGLDPAALPEAPGLLVLPVTTGDAPGPAPAAAHTVAVRALDTIKAWLAEERLAATRLAVLTRGAVAVGAEEDPDLAAATAWGLVRAAAAEHPGRLLLVDTDGTPESLRALPRAVASGEPQLAVRAGTPLVARL
BGC0000051.1	ebeB	M1	ER	MM	Streptomyces aburaviensis	Actinomycetes	WAVVGSGGTALGDLGAGTFADLRALAEEATRTGGPVPEVVLLPVAEPAAPGSPGPAARALTGRVLDALQTWLADDRFASSRLVVVTGGAVAVRPGEGAAAPVQAPVWGLVRAAQAENPGRFVLLDLDEDAASPAAVAAAVHSGEPQLAVRAGTLSVPRL
BGC0000051.1	ebeC	M2	B2KR	MM	Streptomyces aburaviensis	Actinomycetes	WLLLVPAAGADSGWGSALEAAFAEHGVRTGTLAVGDECDRESLAAVLKDREPAGVVSLLASGPGAAAGGAAVPWGLAATVALVQALEDAGVAAPLWCVTRGAVAVDADDRVPSPEQAMLWGLGRVVAAELPDRWGGVLDLPERPGGGAVEAAAAALLGGHGEDELAVRDSGLSVRRL
BGC0000051.1	ebeG	M5	A2KR	MM	Streptomyces aburaviensis	Actinomycetes	WLLATPAGHTGDPWAAGAERALAEHGARVLRIELDPAGDRAGLAARLRELAAGHEPFAGVLALLAPAGQPHPEHPALSVGLVLTLALVQALGDAGVGAPLWCATHGAVSVGGADPLVSPGQAALWGLGRTVALEHPDRWGGLVDLPGRPDARAGARLCGVLAGIADEDQVAVRSGGLYARRL
BGC0000052	ORF11	M10	BKR	M	Streptomyces aizunensis NRRL B-11277	Actinomycetes	WVVISPAGGVDDSAVVGALVGRGAEVRRVVVEAGVDRSALAGLLADAGSAAGVVSLLGLDESEGLLGTVGLVQALGDAGVEAPLWCLTRGAVSVGRSDRLVSPVQAQVWGLGRVAALEVPERWGGLIDLPEVLDERAVSRLVGVLSGGGSGEDQVAVRSSGVFGRRL
BGC0000052	ORF11	M11	0DH-BKR	M	Streptomyces aizunensis NRRL B-11277	Actinomycetes	FAVLGTPGTGIGARIGGDEGFLVGALERAGLTAETYDGLAALDSAVAAGMAMPETVVVSFAAALDPASDSAADTVASVDSAEEVARLAQAVREATHRALATVQGWLDNGRFAGARLVVVTRGAVATGRDTEVEDLAHAPVWGLLRAAQTEHPDRFVLVDLDGADASVRALPGAIASQESELAVRDGVLYAPRL
BGC0000052	ORF12	M12	C2KR	MM	Streptomyces aizunensis NRRL B-11277	Actinomycetes	WLVVVPEVGPADEWTGAVLRMLAERGAEVRTVTVPADGADRDRLAVTLKAETSEVAPSGVLSLLALAAGAGAFAAELALCQALGDADVAAPLWCVTRGAVATGRSEQVADPAQALVWGLGRVASMEQGGRWGGLLDLPADLDGRTLERLAGVLAGDGSEDQVALRASGLFGRRL
BGC0000052	ORF13	M13	BKR	M	Streptomyces aizunensis NRRL B-11277	Actinomycetes	WLLVVPTEHADAPWAVAAERALTARGVTVSTVVLDATLDDRAATARRIGEALAASAATDSAPAGAETLAGVFSLLALEERPHPADPALSAGLAATVALIQALGDAGVEAPLWAATCGAVSTGRTDRLSSTAQAQVWGLGRTAALELPVRWGGLVDLPGTPDERAAGRLADVLGGLGGPGAEDHLAVRSTGVFVRRL
BGC0000052	ORF13	M14	EDH	M	Streptomyces aizunensis NRRL B-11277	Actinomycetes	YAFLGGDSGDSGDSGDTAAADRHQDLAALAAAIDAGRPVPDEVVVELAAAPWAVSASAVHSAAHDALALIQTWLADDRFAAARLVFLTRGAVAADAGDDVTDLAAATVWGLLRSAQTENPGRIALVDTDGHDRSEQALRAALTSDEERFALRAGAVLVPRL
BGC0000052	ORF13	M15	EDH	M	Streptomyces aizunensis NRRL B-11277	Actinomycetes	WAVLGEDEPDLRVGGERLDVYSGLTALREEIAAGTSAPDVVVVPLSSAASGGGRAGTARAAAHHALALVKEWLADERLDGARLVLLTRGAVAAVPDEHVTDLTHAPVWGLVRSAQSENPGRFVLADTDGADASFGALAAALATDEPQLALRSGEAHAFRL
BGC0000052	ORF14	M16	EDH	M	Streptomyces aizunensis NRRL B-11277	Actinomycetes	WAVLGEPVPTDEPGDGVARHADAEALSAALDAGAPVPDAVLVRHPALPEPTPEAVHQAAHRTLGLLRHWLGDDRLADSRLVLLTHGAVAAGDADQVPDPVHAVVWGLVRSAQSEHPGRFLLIDSDSGIDTLSWPTFGAVLASEEPQVALRGGVAHAPRL
BGC0000052	ORF14	M17	EDH	M	Streptomyces aizunensis NRRL B-11277	Actinomycetes	RALVGPELRGLDATPYADLAALAAADSDVPELVFITTRAESEPEGLPGTVHVRAVDALTHVRAWLAEERFASARLVFVTRGAMTVGSDEAVRDLAGAAVWGLVRSAGTEHPGRFALVDLDDDDVLPEQTVLTALAAGESELVVREGSLLVPRL
BGC0000052	ORF14	M18	EDH	M	Streptomyces aizunensis NRRL B-11277	Actinomycetes	WALLGGDPLKLAAALERTGVLEPGALFGTASEDTGGHPRDLSALADAVELAEALGEPAPETVLVSLAPDLAATGGLASAAHRAAADALELIQAWLADERLAGSRLALVTRGAVATDPDADVDDLAHAAVWGLVRSAQAEHPGRLVLVDLDDEDDSYRALPAALDTDETQLAVRDGAVLAPRL
BGC0000052	ORF15	M19	B2KR	MM	Streptomyces aizunensis NRRL B-11277	Actinomycetes	WLVAVAEGAPGDEWTSAVLRTLAEHGADVRQITVARTEDTRAGLAERIRDVLADGPAVSGVLSLLTPAGADEPFQVSAPGGVITTLSLVQALGDAEVAAPLWCVTRGAVATGRSEQVADPAQAPVWGLGRVTALEHGERWGGLIDLPGTDAVDDRALARLAGVLAGDAAEDQVAVRASGLFVRRL
BGC0000052	ORF15	M20	B1KR	MM	Streptomyces aizunensis NRRL B-11277	Actinomycetes	WLVVVPENGPADEWTGAVLRVLADRGAEVRTVTVPADGADRDRLAATLKAETDGAAPAGVLSLLALAVESAELRTHTGLLATAALVQALGDADVAAPLWCVTRGAVSVARTERLQDPAQALVSGFGRTVALEYPDRWGGLVDLPEQADGRTLERLAGVLAGDGSEDQVALRASGLFGRRL
BGC0000052	ORF16	M21	EDH	M	Streptomyces aizunensis NRRL B-11277	Actinomycetes	WALLGEPRTEFTAALPTAATHADLAALGAALDAGGPVPRAVIVPFSASGAPSATPVDAALPTAVADALHRTLELAQAWLADDRFAGSRLVFVTRDAVATTAGSDVADLAHAPLWGLLRSAQSEHPDRFVLLDLDGREDSLRALPAALATAEPQLALRAGKALVPRL
BGC0000052	ORF16	M22	ER	M	Streptomyces aizunensis NRRL B-11277	Actinomycetes	WAVIAADGGTDGGTDGGTDGGIPAALPGRVHTGLDALGAAVDAGAPVPAHVLVHHTPAATTADAVHAATHEALRLVRAWLADDRFAASRLVFVTRGAIATQSDWDLTDLTHAPVWGLVRTAQSENPDRFVLADLDADPASTDALAAALATGEPQLAVRRGTVHAPRL
BGC0000052	ORF16	M23	EDH	M	Streptomyces aizunensis NRRL B-11277	Actinomycetes	WMLLGAGSQVYADLAGLGVAVAEGGGIPAALVVPVSEPDAESAAGGVAGTVHAAVERALSLVQEWLSDERFADARLVFLTRGAVAARAGDTVPGLVQAAVWGLVRSAQSENPGRFALIDVDGDGDGDGEVDGDVLSAALATGEPELAVREGALLVPRL
BGC0000052	ORF16	M24	EDH	M	Streptomyces aizunensis NRRL B-11277	Actinomycetes	WALLADDGSGHAGLEAVGVRHEAHTGLAALADTGRAIPEVVCVPLAAANSQDLAGAGAVHAAVERALGLVQEWLSDERFADARLVFLTRGAVSAVPGEDVTDLVHAPVWGLVRSAQSENPGRFVLADTDGTDASYRALTAALASGEPEFTVRGGAVRVPRL
BGC0000052	ORF17	M25	EDH	M	Streptomyces aizunensis NRRL B-11277	Actinomycetes	WMLLGAGSQVYADLAGLGVAVAEGGGIPAALVVPVSEPDAESAAGGVAGAVHAAVERALGLVQEWLSDERFADARLVFLTRGAAAARAGDTVPGLVQAAVRGLVRSAQSENPGRFALIDVDGDGEVDAEVLSAALATGEPELAVREAALLVPRL
BGC0000052	ORF17	M26	EDH	M	Streptomyces aizunensis NRRL B-11277	Actinomycetes	WAVVGADSLGLEAGLRADGVAVDGYADLSALAGVVAAGKPQPDTVLVSYASSGPGIRTADAVRQAAHDALELVQGWLAEESLAGSRLVVVTRGAVEARPGEGVPDLAHAAVWGLLRSAQSENPGRFVLLDLDAEDAEVLAPLMAAAVASGEPQLAAREGVLHAARL
BGC0000052	ORF10	M6	0DH-BKR	M	Streptomyces aizunensis NRRL B-11277	Actinomycetes	WAVLGSADGFADLEALGAAVDAGAPVPPYVVVPLERQATGNGSDALHEAVHRALALVRSWLDDQRFETSRLVVLTRGAVAGPGEGVEDLPHAAVWGLVRSAETENPGRFVLADVDVDLDADLGSGVGLAAVLASGEPELLLRDGVVHAPRL
BGC0000052	ORF10	M7	AKR	M	Streptomyces aizunensis NRRL B-11277	Actinomycetes	WLVAVPAPYADDPWVRALTDRMAEGGAEVVPLTLDVADSDPASLRARLDERLREAVGDGPVAGVLSLLALDERPHPDHPSVPVGLALTSALTSVLTPVLTEPDPEGGASGGIEAPLWCVTRDAVAAAGGDELGGAAQAQVWGLGRVVALEHPDRWGGLVDLPAVCDDRVLSRLMAVLAGSGDEDQVAVRTSGTLVRRL
BGC0000052	ORF11	M8	EDH	M	Streptomyces aizunensis NRRL B-11277	Actinomycetes	WAVLGAADAGDSPRDALVNGLLGHLPGEVARYADLAELAAAVEAGAATPDAVFAAYARSDDDGPAAPDVSAPDVSAQAVHAATHDALALVQTWFGEEPFAGDRFAATRLVVLTRGAVAAGDGDTVTDPAHAAVWGLLRSAQSEYPDRLLLIDTDGVEDSVHALPAVLAVGEPQLALRAGSVHALRL
BGC0000052	ORF11	M9	BKR	M	Streptomyces aizunensis NRRL B-11277	Actinomycetes	WVVVSPDKGVDDSAVVAGLAGRGAEVRRVVVEAGVDRSALAGLLADAGSAAGVVSLLGLDESEGLLGTVGLVQALGDAGVEAPLWCLTRGAVSVGRSDRLVSPVQAQVWGLGRVAALEVPEHWGGLVDLPEVLDERAVARLVGVLAGSGEDQVAVRSSGVFGRRL
BGC0000052.1	ORF9	M1	BKR	M	Streptomyces aizunensis	Actinomycetes	WVVISPAGGADDSAVVSALVGRGVDVRRVVVEAGVDRSALAGLLAEVGSPSGVVSLLGLDESGGLLGTVGLVQALGDAGVGAPLWCLTRGAVSVGRSDRLVSPVQAQVWGLGRVAALEVPEWWGGLIDLPEVLDERAVSRLVGVLAGSGEDQVAVRSSGVFGRRL
BGC0000052.1	ORF9	M2	BKR	M	Streptomyces aizunensis	Actinomycetes	WVVAVPAGSAGDDARVEAVTNGLAGRGVDVRRVVVEAGVDRAALAGLLAGEGSLAGVVSLLGLDESGGLAATAGLVQALGDAGVSAPLWCLTRGAVSVGRSDRLVSPVQAQVWGLGRVAALEVPERWGGLVDLPEVLDERAVSRLIGVLAGSGEDQVAVRSSGVFGRRL
BGC0000052.1	ORF9	M3	EDH	M	Streptomyces aizunensis	Actinomycetes	WAVLGRDGLGLPATGVQGQVAEYDDASALGAALAAGEPVPDAVFVHPGALPGQDTDTTAASVHAAVTDALSFVQEWLADERFAATRLVWLTSGAVADEPGAGVRDLAGSAVRGLLRSAQSENPGQLLMLDLDQDPASLAALPAALAAGEPELAIRRGELRTPRL
BGC0000052.1	ORF9	M4	BKR	M	Streptomyces aizunensis	Actinomycetes	WVVISPAGSVDDSAVVSALVGRGAEVRRVVVEAGVDRSALAGLLADAGSAAGVVSLLGLDESEGLLGTVGLVQALGDAGVEAPLWCLTRGAVSVGRSDRLVSPVQAQVWGLGRVAALEVPERWGGLVDLPEVLDERAVARLVGVLAGSGEDQVAVRSSGVFGRRL
BGC0000052.1	ORF9	M5	AKR	M	Streptomyces aizunensis	Actinomycetes	WLVVTPATSLVDLPAVSAALAAQGVDVREVALEAAELDRDGVAGRMREALAGDRADGVLSLLALAEHPHPAHPAAPTGLLLTGTLVQALGDAGVDAPLWCLTTGAVATAPSDLIGSAAQAQVWGLGRVVALEHPERWGGLVDLPVPADERALDRLLAVLAGAGDEDQIAVRSAGLLARRI
BGC0000053	ElaA1	M1	0DH-B1KR	MA3	Streptomyces malaysiensis DSM4137	Actinomycetes	WAVLGDDPLGLSAAVDAVPYDEMAEVPDVVLVPCAAEGRTDVAEAAHEATHRVLVLIQRWISDERLAPSRLVFVTRGAVAAVPGEEVPDVAHGAVWGLVRSAQSEHPGRFTLVDLDTDPESATALPAAVASGEPQCAVREGLVRVPRL
BGC0000053	ElaA1	M2	AKR	M	Streptomyces malaysiensis DSM4137	Actinomycetes	WWVAVPEGRADSARVAAVVAALGWRGSRVVPLTVATTGRDAVCDAVRDALAERLRREADTGGTPAGVLSLLALDDAPHPEHTALTTGLALNVGLVQALGDAGIAAPLWLATTGAVSVSGSDPLGSPAQAATWGLGRVVALEHPQRWGGLVDLPGDLDERSADRLCAALSGIVGDSGPEDQLALRDAGVFVRRL
BGC0000053	ElaA2	M3	C1KR	MM	Streptomyces malaysiensis DSM4137	Actinomycetes	LLVAVPAEAGPADSGAEDSGAAETGAAEAKPVATEAIVAGLAALGVETVPVRIGADDTDRDRLATRITEALGEAGAPGGVVSLLALDEAPHPEHRDIPTGFATTLALVRALGDAGIDAPLWCVTRGAVSTGGADRLGAPAQALVWGLGGAVALEHPQRWGGLIDLPGSLDEGSLRALARALGGRGGGEQLAIRASGTLARRL
BGC0000053	ElaA3	M4	A2KR	MM	Streptomyces malaysiensis DSM4137	Actinomycetes	WLLAVPAGHLVGHDVEHSVGHPVGHPVGHPVGHLGTELIDAVRDGLETHGATVVTVEVAEADRAAVAARLAEATAGAAPSGVLSLLGLPDAPHPGHAGVPMGLALTLALVQALGDTGVAAPLWLATRGGVSAGGTDALDSPAQAAVWGLGRVAALEHPQRWGGMIDLPDTVDGRVTTRLCGALAGRLGDEDQLALRPSGVFVRRL
BGC0000053	ElaA4	M5	B1KR	MM	Streptomyces malaysiensis DSM4137	Actinomycetes	WLIAALAGAPEGPRVAEALRERGAQVRLVELTEADVVREALARRLDEATADAPPTAVLSLLALAEEPYRAGTAQPLGLALNLALLQALGDTGADVPLWYATRGAVSVGRADVLDHPLQALTWGLGRIAAAEYPRRRGGLVDLPGTLDDRTVARLCGVLAGRLTGEDQVAVRASGVHGRRL
BGC0000053	ElaA4	M6	EDH	M	Streptomyces malaysiensis DSM4137	Actinomycetes	WTLLGDDDFKLVGLDVRTYQNLAALPADPAAMPATVLVPCAPEPRGVADAVRTATHRALALLGAWLTEERFADSRLVFITRGAVATTPGADVPDPAHAAVWGLVRSAQSENPDRFVLVDLDEHEESALALPTALALDEPQLAVRRGDITVARL
BGC0000053	ElaA5	M7	EDH	M	Streptomyces malaysiensis DSM4137	Actinomycetes	AALVGDDGLEVTESLFAAGVHLESYVDLESLGAAVDAGTAAPAAVLVCCQAGPGAPADAVRDSLRTALELARSWSADERFADSRLVFITRGAVATAPGAEVTDLPGAAVWGLVRSAQSENPDRFTLVDLDAHEESVRALPAVLPSGEPQLALRAGQPHTPRL
BGC0000055.1	eryAI	M1	B2KR	MM	Saccharopolyspora erythraea NRRL 2338	Actinomycetes	WLVAKYAGTADETSTAAREALESAGARVRELVVDARCGRDELAERLRSVGEVAGVLSLLAVDEAEPEEAPLALASLADTLSLVQAMVSAELGCPLWTVTESAVATGPFERVRNAAHGALWGVGRVIALENPAVWGGLVDVPAGSVAELARHLAAVVSGGAGEDQLALRADGVYGRRW
BGC0000055.1	eryAI	M2	A1KR	MM	Saccharopolyspora erythraea NRRL 2338	Actinomycetes	WLVVVPEGHEEDGWTVEVRSALAEAGAEPEVTRGVGGLVGDCAGVVSLLALEGDGAVQTLVLVRELDAEGIDAPLWTVTFGAVDAGSPVARPDQAKLWGLGQVASLERGPRWTGLVDLPHMPDPELRGRLTAVLAGSEDQVAVRADAVRARRL
BGC0000055.1	eryAII	M4	ER	MM	Saccharopolyspora erythraea NRRL 2338	Actinomycetes	DASDLDAVLRSGEPEPDAVLVRYEPEGDDPRAAARHGVLWAAALVRRWLEQEELPGATLVIATSGAVTVSDDDSVPEPGAAAMWGVIRCAQAESPDRFVLLDTDAEPGMLPAVPDNPQLALRGDDVFVPRL
BGC0000055.1	eryAIII	M5	A1KR	MM	Saccharopolyspora erythraea NRRL 2338	Actinomycetes	VLLVTGPGVPSELSDAIRSGLEQSGATVLTCDVESRSTIGTALEAADTDALSTVVSLLSRDGEAVDPSLDALALVQALGAAGVEAPLWVLTRNAVQVADGELVDPAQAMVGGLGRVVGIEQPGRWGGLVDLVDADAASIRSLAAVLADPRGEEQVAIRADGIKVARL
BGC0000055.1	eryAIII	M6	A1KR	MM	Saccharopolyspora erythraea NRRL 2338	Actinomycetes	FLVHGSAPESLTSAVEKAGGRVVPVASADREALAAALREVPGEVAGVLSVHTGAATHLALHQSLGEAGVRAPLWLVTSRAVALGESEPVDPEQAMVWGLGRVMGLETPERWGGLVDLPAEPAPGDGEAFVACLGADGHEDQVAIRDHARYGRRL
BGC0000058.1	gfsA	M1	A1KR	MM	Streptomyces graminofaciens	Actinomycetes	WLLVVPDTDEPDARVDAVTGALVTAGATVERIVVEAGADRADLAELLAALATDVGGVRGVVSLLALSEDADAMRPSVPSGLASTLTLVQALGDADVSAPLWCLTRGAVSVGASDRLDSPVQALVWGLGRAAAVEHPERWGGLLDLPATLTGRVLDRLVGVLAADGDEDQVAVRAAGVFGRRL
BGC0000058.1	gfsD	M10	0DH-B2KR	MM	Streptomyces graminofaciens	Actinomycetes	RPVLRSRDELEALRRAVADGQPAPALAAFICAAPGATEAPGTDALGNDLAQAVRATTADTLDALRAWLDDDRLEESRLAIVTCRAVVTGTDGAGAGGLNLAQTPVWGLVRSAQAENPGRFLLVDVDDLDAVPDVLARLEGPEGPEGLNEPQVAVRGGQFTVPRL
BGC0000058.1	gfsE	M11	EDH	MM	Streptomyces graminofaciens	Actinomycetes	GGDSDALAADVLEVHRFDGLVQDPQGVREAIERALGLIQGWLARERPRGSRLVVVTRGAVGGEVSDLAGAAVWGLVRSAQSEHPGQFVLVDTDGDALAGLPADEPHVMVREGQVLVPRL
BGC0000058.1	gfsE	M12	EDH	MM	Streptomyces graminofaciens	Actinomycetes	WAVLGGGEVGGVGLGSYDDLAALRRAVDSGAPVPEVVLTFCGGRSETAVVPGTHTATREALALLHEWLADERFAGARLAVVTSGAVAAGPDDEVTDLAAAAVWGLVRSAQSEHPGRFVLLDVDGRAVAGAAVPTALATGEPQVAVRGGELLVPRL
BGC0000058.1	gfsA	M2	A2KR	MM	Streptomyces graminofaciens	Actinomycetes	WLVVIPEGYEADERVTASARALAERGADVVEVRVDEAGEDRTALAERLSDTGADTGPVAGVLSFLALAEQGFPQHPEVPTGLALTLHLVQALGDAGIDAPLWSVTSGAVSTGDDEAPSHPVQAHIWGMGRVAALEHSERWGGLVDLPEAPDEQAARRLGAVLADTRGEDQVAIRPSGLYGRRL
BGC0000058.1	gfsA	M3	BKR	M	Streptomyces graminofaciens	Actinomycetes	WLLLAPAGSEAAGSLVRSLAEAMAEHGAEVVTVDLGHPDSDRARDALAEQITGRLDGLAPGQVGGVVSLLALAEGTDPHHPTVSRGLALTLSAVQALGDAGVTAPLWCLTRGAVSAGATSGPDEPVQAQVWGLGRVAALEHPDRWGGLLDLPEQVDSRTVRRLVRALAAGHRPGGEDQIALRTAGVLARRL
BGC0000058.1	gfsA	M4	EDH	M	Streptomyces graminofaciens	Actinomycetes	WVALDRGAGWAQGEGCEVLPDLAALGSAVSAGRSVPRLVVAHFAADREVPVTAGVRGVTAEGLELIQSWLADERFADSRLVIMTRQAVAVDAGEGVFDLGAAALWGLVRTAQSEQPGRVVLVDVDDLDAVSRVVGIGDEPQLAVRDGRVFVPRL
BGC0000058.1	gfsB	M5	ER	MM	Streptomyces graminofaciens	Actinomycetes	WAVLDADDLAYALNLPSHPDRDALAALDPAPPVVLTGWPVPDDPAPQAARTVLARALHDIQDWLADDRLADTRLVVVTHNALPADDWQDTDPVAASLTGLLRTAQSENPGRLVLIDTDGHPASWQALPALVATGEPQAALRLGEARVPRL
BGC0000058.1	gfsB	M6	BKR	M	Streptomyces graminofaciens	Actinomycetes	WLLLVPAGAEDAADATRTVEGALAEHGGEVVKVDVAHPEADEARTALAQQITEQFIERFGVTEIGRLRGVVSLLALADGDDPRHPSVSRGLALTLGLVQALGDMELTAPLWCLTRGAVAVDASDGVDGAVQAQVWGLGRAVALEHPDRWGGLVDLPEYVDPRTARRLTGVLTGTGAGAGAGGLGREDQIALRATGAFGCRL
BGC0000058.1	gfsB	M7	EDH	M	Streptomyces graminofaciens	Actinomycetes	WAVVGGGEAGVSAGGPGLGSYEDLAALRRAMDSGAPVPEVVFAHCGGGAEAADVVGGTHTATHAALVSLREWLADERFAGARLAIVTGGAVAVRPGDEVSDLAGAAVWGLVRSAQSEHPGQFVLVDTDGAAEPSSAAAALATGEPQVAVRGGEVFVPRL
BGC0000058.1	gfsD	M9	EDH	M	Streptomyces graminofaciens	Actinomycetes	GGDSDALAADVLEVHRFDGLVQDPQGVREAIERALGLIQGWLARERPRGSRLVVVTRGAVGGEVSDLAGAAVWGLVRSAQSEHPGQFVLVDTDGDALAGLPADEPHVMVREGQVLVPRL
BGC0000059.1	pteA1	M1	BKR	M	Streptomyces avermitilis MA-4680 = NBRC 14893	Actinomycetes	WLYVVSEETAWTEAIRAGLTELGVALVPFAVGEDTDRDALARAFADAGQEQADGILFAAAQGEAGANALQRLVLLVQALGDAGIEAPLWCLTSGAVSTGTADLLTDPVSAQLWGLGRIVALEQPQRWGGLVDLPAELDSRALERLAGLLAQADEDQLAVRASGVYGRRL
BGC0000059.1	pteA4	M10	AKR	M	Streptomyces avermitilis MA-4680 = NBRC 14893	Actinomycetes	WLFLVTEDTEAFEAFEWTAAVADGLAARGARLVRVTVDPAADRGALLRQLGEAVRESPLDGVISLLGIDERHHAGHPALSVGTVLTLALVQALGDAGIDAPLWALTRSAMSTGRADAVPSAAQNAVWGLGRVAALEHAPRWGGLIDLPDTVDDRIAGRLAAVLAQSAEDQVAIRDRGVFGRRL
BGC0000059.1	pteA4	M11	AKR	M	Streptomyces avermitilis MA-4680 = NBRC 14893	Actinomycetes	WLVPVSAAQLGDDWVTACLRGLTERGLAPLPVPVEPATGREDLAAQLTRAAGDETVAGVLSLLAVDCGAAPAAAALTVGVALSVLLVQALGDAGIGAPLWCVTRNAVGVSTADEATDPYQSQVWGLGRVAALEHAPRWGGLIDLPDTVDDRIAGRLAAVLGQSAEDQVAIRDRGLFVRRL
BGC0000059.1	pteA5	M12	AKR	M	Streptomyces avermitilis MA-4680 = NBRC 14893	Actinomycetes	WLLAVPAEENEQTAAVRTALTARGATLKTLVVDAASHRAGLAGELAGIGPVDGVLSLLVNGDPVLPTLLLVQALGDAGVDAPLWCLTSGAVAVSGSDAVRDARHAQVWGLGRTVALELPRRWGGLIDLPESVDDQAAVRLADVLEQALTGRWEEDQLAVRASGVFARRL
BGC0000059.1	pteA5	M13	A1KR	MA10	Streptomyces avermitilis MA-4680 = NBRC 14893	Actinomycetes	WLAVLPAGLADEQWAPCVVGVLAAHGAKVRVVELPVDCDRSQAAKRLAEELRGEQPAGVLSMLGLAPGCHPAHPTLSASLATTVTLLQALGDVDVQAPLWCATRGAVSTGVTDPLRDAGQAQLWGLGVVAALELPRRWGGLVDLPEELDEHALRRLAGVLAQHDEDQLAVRVDGVYGRRM
BGC0000059.1	pteA1	M2	EDH	M	Streptomyces avermitilis MA-4680 = NBRC 14893	Actinomycetes	GMRIETYEDLAALRATDPPADTEADAAAAADAVVVPCPTGTGADLATRVREVTHAVLELVQWWLAEERPGRLVLVTRGGDLAQSAVCGLVRSAQTENPDRIVLVETSSDAHAGAGSGVDDADLARVLPGLIASGEPQAAVHADDEVRVPRL
BGC0000059.1	pteA1	M3	EDH	M	Streptomyces avermitilis MA-4680 = NBRC 14893	Actinomycetes	LMIETVADFDALRESEGTPDVVVVPCPAGSGRETADRVHSTTSEVLALVQWWLAEERAGRLALVTRPGDLAHAAVWGLVRSAQSENPDRIVLVEAEETDEAVRVLPAALASGEPQFAVRDGEVFVPRL
BGC0000059.1	pteA1	M4	EDH	M	Streptomyces avermitilis MA-4680 = NBRC 14893	Actinomycetes	GLDVRSYADLAALSTEPALPDVAVVTVVPCPAGSGRETADRVHSTTSEVLALVQWWLAEERAGRLALVTRPGDLAHAAVWGLVRSAQSENPDRIVLVEAEETDEAVRVLPAALASGEPQFAVRDGEVFVPRL
BGC0000059.1	pteA2	M5	EDH	M	Streptomyces avermitilis MA-4680 = NBRC 14893	Actinomycetes	GTAVAYVPDLAALAEADGPSQPDVVVVPCPDGPEGATEAERVRAVSTDVLRLVQRWFAEDRTPRLVLMARCDDLAHAAAGGLVRSAQAENPGRIVLLETDRPDEAAALVPGVVLSGEPHVVVREGEVSAPRL
BGC0000059.1	pteA2	M6	EDH	MM	Streptomyces avermitilis MA-4680 = NBRC 14893	Actinomycetes	VVQAYDGIAALLAAPTVETGAQADTDAVVVPCPGGSGTDVERVRSVLAEVLWLVQWWQAEDRAARLVLVTRGAVAAGDESAQGDPVQAAVWGLVRSAQSENPDRIVLLDTEQNADVEQVAATVVPRLVASEEPQAALRGDALLLPRL
BGC0000059.1	pteA3	M7	0DH-BKR	M	Streptomyces avermitilis MA-4680 = NBRC 14893	Actinomycetes	WAVLGDEGVHSDIDALRKAVDGGAATPAHVLLPCAPSEGDAAAATRGALAGVLSVVQEWVADERFSDARLVVMTRGAVELDGTALDLAHVAVSGLVKSAQTEHPDRLLLVDADDSVTNGGTVTDGGVDPALAAALAALDEPQAAVRDGKLYVPRL
BGC0000059.1	pteA4	M8	AKR	M	Streptomyces avermitilis MA-4680 = NBRC 14893	Actinomycetes	WLFAAPEGDEWAGTVRTALAGRGAHLIPLTVGADADRASLTDELTRVAGEAGSLDGVLSLLATDEIASPEHPALSQGFAQSVALAQALGDAGVDAPLWCATRGAAATGRSDDAPLSAVQNQVWGLGRALALEHARRWGGLIDLPAAVDERAAGRIAAVLSQGADAADGQEDQVAVRATGVFTARL
BGC0000059.1	pteA4	M9	AKR	M	Streptomyces avermitilis MA-4680 = NBRC 14893	Actinomycetes	WLLVVAGESEWTASVRTALDERGLELVTLVAGPGTDRGTLARELAGVGPVTGVLSLLAEDESASAGDPGLSHGLAATLCLVQALGDVGVDVPLWCATRGAVATGRSDRVDRPLQSQVWGFGRAAALEHPRRWGGLLDLPELLDARTAARVAAVLGQTAEDQVAVRASGVLGRRL
BGC0000060.1	fosA	M1	0ER-EDH	M	Streptomyces pulveraceus	Actinomycetes	WALIGRSPVPDPVSTLAAEAVDIRTYPNLDALVHGIENGDPHPSVVLADLAAHGAELPAHEGERTGEHEGGAAGAHAVARRTLALLTSWLDAPALTVGRLVLVTHDATAAATAPDALGLPQATAWGLVRSAQTENPGCFTLVDIDGDPSDGYAALPAALRTGEPQLAVRDGEVLVPRL
BGC0000060.1	fosB	M2	ZDH	M	Streptomyces pulveraceus	Actinomycetes	WLLFGTARPGLAELFEHVLTSTEWDASASTPVEGVLVCPADASELLAALRETERLDAPVWCVTSGAVGVGVDDPATDVAAAGAWGLGRVAALELPSRWAGLVDVPETADLGTADDNAGRTTARLLAGVLTGDGAEDQLAVRDGRLWARRL
BGC0000060.1	fosC	M3	ZDH	M	Streptomyces pulveraceus	Actinomycetes	WLVVPPAAADGASDIPAWVGELVEHTVTVPPHEAADRATLASALCALSAQPADAIADGFAGVLCFADRPETLLTALQALTDARVTAKVWCLTRDSGTDPDAAAVWGAGRAAALELPDTWGGLIDLPADGAEPPLGQLAALLAGDTREDQVRVAGDGLEVRRV
BGC0000060.1	fosC	M4	AKR	M	Streptomyces pulveraceus	Actinomycetes	WLIVAPESDADTAEDGASAALADAVTAALADAGATTRLLTVDVATADRATLAKELARELDRTPASDERFAGVLALPWPSGETARRDGVSAAADATLLLVQALLDTGRTDPPLWTLTRGAVRALESDAAPDPWQAQVWGLGRVVGLEHPGLWGGLIDLAASTDDDPLGCGGLARLAAVLAGRSGGDDQLALRDDSVHARRL
BGC0000060.1	fosD	M5	B1KR	MM	Streptomyces pulveraceus	Actinomycetes	WLLAIPGAEHGFGPDHRLVGWVLDAVEAAGGRALLVELDPREDTDPAAWAASLHAAAADARPAGILSLLALDDRPLPGRPAVGRGLAGTTLLVRALAQTNLPGRLWCLTHGAVGTDPTDPPAAPHAAAVWGLGRVAALEHPTLWGGLIDLPRAPREADGQDGRTAPDAATAAQLCAVLADPGDEDQLALRPTGVLARRL
BGC0000060.1	fosE	M6	EDH	M	Streptomyces pulveraceus	Actinomycetes	LALLDLGADWSVESVPARRHADLAALAAAIDADPAEAPRDVLIALPALGGVDGDIAAATHQRTQTVLHLLQDWLKQPRFASVTATLLTRGALAVDAAEAAAVDLASAAVGGLIRSAQLEHPGRFRLIDTDGEEASLRALPTLLGTGNGTDIGTGTGVVAEPQIALRAGVPSVPRL
BGC0000060.1	fosE	M7	AKR	M	Streptomyces pulveraceus	Actinomycetes	WLVAVPGEPVEPDLVIAVEKALVDAGARVERCETAELRARLAAVAPRGVLCLPAVGAQRDRDRERGIATGALAVLDLLHTVQDAGVDTRVWALTCDAVCAQADDAAPDPWQAQVWGLGRVAALEHPTLWGGLIDVSGTSPAAQLTGLAAALANTTGDDQIALRGELLLGRRL
BGC0000066.1	gdmAI	M1	ER	MM	Streptomyces hygroscopicus	Actinomycetes	WATLGDAHTDVDAHVDALIAGEDRPGAVVADTAAWAAGDTGLPARARDLAARALDLVQRWVGRPELADVRLVLLTRGAVSVHDTAEVTDPAAAAIWGLVRSAQSEHPGRIALVDTDDVSREALPEAVAAGEPQVALRRGLLWVPRL
BGC0000066.1	gdmAI	M2	ER	MA21	Streptomyces hygroscopicus	Actinomycetes	WAALEAVQDDDTWPPVVVADTRAFAAQGGGLPDEGGLQEDGELPERARELTGRALAAIQRLISDDALADSRLTLLTRGGMAVHDDTEVTDPAAAAVWGLVRAAQAEHPGRVCVIDIDDRSAEALTAALATEEPQLALRGGTAWVPRL
BGC0000066.1	gdmAI	M3	A1KR	MM	Streptomyces hygroscopicus	Actinomycetes	WLVAVASPQASDAAVTDVVAALAAHGADPVVVEVDTVEQAEVTARLRERISDSDDEYAGVVSLLAWDERSYEPGTLSRGVAATVALIQAVEEIGLAAPLWCLTRGAVAVREPSEVTSEFQPLAWGMGVVQGLDQPSTWGGIVDLPRTPDETALVRLCSVLAGVDAEDQVAVRASGVFARRM
BGC0000066.1	gdmAII	M4	EDH	MM	Streptomyces hygroscopicus	Actinomycetes	WGTVGDVSPVLAAAEAPAFADVTEIATGPAIGMGTEIAGAEERPALVVADTTVWESRDADPITRARELATRALDLLQRWVTLPELSETRLAVLTRGAMAVHDSSEVTDPAAAAIWGLVRSAQSEHPGRVHLIDTDGHSDHALRSALPTALATDQPQLALRDNTLWAPRL
BGC0000066.1	gdmAII	M5	A1KR	MA21	Streptomyces hygroscopicus	Actinomycetes	WLVLVPAVRAGSARVRAVLDGLAARGAEVVAAEVSETGREALGDQVKSADGGAGVVSLLSWDDRADTEYGTVSTGTAATLAVAQALRDHGVTAPLWCVTSGGVAVAGEAADPVQSAVWGFGAVLGLDHPDTFGGLIDLPAEGEGDDEALPDGLFAALSSPEGEDQLAVRADGLFARRM
BGC0000066.1	gdmAIII	M6	ER	M	Streptomyces hygroscopicus	Actinomycetes	WAPLGESATGATGGYGATGDGGGPGGALPDVLVADTRAWAEDLTGPPTARARELTGRLLEEIQRWVADDAMAGTRLAVVTRGAVAVHDDTEVTDPAATALWGLVRSAQAEHPGRVALVDADGACEELPAGVWSGDEPQLAVRGGAVWVPRL
BGC0000066.1	gdmAIII	M7	EDH	MM	Streptomyces hygroscopicus	Actinomycetes	WATLGESRLPDSPPSYPDLSTAVEAVESAEAGERPAVLVADVSAWVPEKTGPIDRTHALCARVLDLLRQWVDRRELADTHLVVLTHGAMAAHDTAEVTDPAAAAVWGLVRSAQSEHPGRIRLIDIDDHSHQALPTALATTEAQLALRDATAYTPHL
BGC0000069.1	gphF	M2	EDH-CMT	M	Cystobacter violaceus	Myxococcota	VALIPDRTGYADALAEALRSRGAAVTVTEVEGETLEGWLRDEAPFAARAEVIHCAALDCASPQEASEPERIHELAVRNCSALVPLLARLRALPGALSLRLLTRGAAPLGPSAGGEISGAALAQAALWGVARVIPLEHPHLRTTCHDLDPAAAPAEAVAALAREIDGGEPDDESRVAYRGGARLVAQL
BGC0000069.1	gphG	M3	B1KR-CMT	M	Cystobacter violaceus	Myxococcota	WHVAAGGEEAAPLAVSLAAELRVREQIVAAHLDEPVEQVVYVAGGSAPARACADVLALLEALRRSPSARLWLITRGATSVGPVVEPLHAALWGMASVIAVEAPEHRCTCIDLGAGAGAANAGGEPGAIERLVGELLDGGDEEQLALRGGKRLRARL
BGC0000069.1	gphG	M4	ER-CMT	M	Cystobacter violaceus	Myxococcota	RLILSDRGGLGETLAAMLRAAGDEVECLPASRRGELDEQMAARFDDLVHLWGLDVEEGLDGVAAARAAIEGGVFSALAGLRPRMGSQDATVLLVTRAAVFDEVGVTEARPSLLGGASGCFQAPLWGLGRVASLELTGVRVVCLDLDPCPDPADAAYLCEELNARGSKEDRVILRAGQRLVARL
BGC0000069.1	gphI	M6	0DH-B2KR-CMT	M	Cystobacter violaceus	Myxococcota	WMLFLDDDPAHEGLRSRLEAHGERCVVVRAGGAPRRDDERALGFDPADPADAGVRLDGVLAALEREGGVDRVLFAWTAGDDANSEAAIRRCAALLHLTQALLRARASRPIRLFVLTRAAQAVAAGEPVEPMMAPVWGLVRNVALEHPELGAHLVDVDREAASEPALAALLARASERLPEEAVAVRGGRMHVMRL
BGC0000069.1	gphJ	M7	BKR	M	Cystobacter violaceus	Myxococcota	WIVVGPQSLAEPLAAALPGAAIVVPDVLPDDAVVAALGGDASSARDRGLLILTALDERLAGAEVEALPSAVLRWTRVALASPHVSRLVFVTAAAQDPAADTGPSSASVRPAAATLWGLGRSIAQERPELGMLLVDLDPATPGDHVGSLLACLALADHHDETELGARAGRLYRARL
BGC0000072.1	gulA	M1	ZDH	MM	Pyxidicoccus fallax	Myxococcota	WLVFADDQGVAEAAAGLLSASAHAVHRLHPADAFRRDGNDFHIRPNEPEDYRAVLQALLASRGPALPLGVLHLWNLRLPEGGATAVPDLREMAKLGNLSLTHLLKALDGAGGSAPPRVWIGTRGAWALPGSEQGLAPAQSAVWGLTRAIAQEHPALWGGIIDLDPLEAPRLQAERLVTEVSVPQPAEDRILYRQGRRQVSRL
BGC0000072.1	gulB	M2	AKR	M	Pyxidicoccus fallax	Myxococcota	WLVLGASGGLPEALAARLRATPDLVRHVSLEALRSVPVPPHGLVDAERLERWFTDTLQVDLAEFDFLVYVPACGAPEDASAERQVSEDCAILVSLAQALERRPGARGPALWVVTSGAQAVAPREPVNPFAAPVWGLGRVLALEAPRGLGGLVDLPLAWSEQDVGCLLEALRHPGEEDQLALRSGQRHALRL
BGC0000072.1	gulC	M3	EDH	MM	Pyxidicoccus fallax	Myxococcota	WLVLGAPGPLHDRVVAELRGRGLDTVQAFPANSWEEQDAARFHLSPADPEHLRRLMERVSADRPLRGLINLQPYQVARGDAASSAPEGVLSALYMEVLDQARALQGVSRRERPKLVLVSGVSQGAEAEPDLVAAPLQGLGRVIAAELPRLHCVQVQLGGQEPEVEARDLVRELYANDGEDEVVLRGGARHVRRL
BGC0000072.1	gulD	M4	BKR	M	Pyxidicoccus fallax	Myxococcota	ARPKGHLVFSDGSALAEALRAELEAAGSRFGWVSRGQDFAADGTRCTVDPENPEHLERLFGHLAAESFDFDHVLLLFTRVEDEARPDGAAPWFDTAVRPVHVLRCLTQALLTTERRPRMAVITRAALSAGGGTEAVPQHTALWGFGRALALEEPGLSLALLDLPAVPDGLVEARHVLARLASPTPERQSAWRDGRWRVPRL
BGC0000072.1	gulF	M6	0DH-0ER-B2KR	MM	Pyxidicoccus fallax	Myxococcota	WLLFADDQGVAAAVADRLAPSGVRTTLVRKAPGAVTRAGSGWTLDPGTPESFRELLAAVSPGSFTRVLYFWGLDAPAVDPEPDALDARLPETEALIYLVQALAAREAQPGPRLWLVTAGALPGADGEAVSPMQTPLWALGRVLDYEHPELKTVSCELERHVTEKHVAVLTSLLLAPEVPDQVRVRADGPAAARL
BGC0000073.1	hlsD	M11	CKR	M	Streptomyces halstedii	Actinomycetes	WLVVAPAEDLELVDQSVAALEAHGASVIVLRPTEGSDCGDRHMWAESLRRVVPSDEVDSLAGVVSLVGDVAGTLGLVQGLGGVGVVAPLWCVTRGAVGVGGGDVVVSPVQGLVWGLGRVVGLEHPERWGGVVDLPVSVDGRGWERFCSVLAGGGGEDQVAVRSSGVFVRRL
BGC0000073.1	hlsE	M14	CKR	M	Streptomyces halstedii	Actinomycetes	WLVAVPTGPEHKELVDQCAEALERHGARVVLVRPDASAPADRRTWLAALRQALPEQPHQNLTQTQTQAQEAADAGQSLAGVVSLVGDVAGTLGLVQGLGGVGVVAPLWCVTRGAVGVGGGDVVVSPVQGLVWGLGRVVGLEHPERWGGVVDLPVSVDGRGWERFCSVLAGGGGEDQVAVRSSGVFVRRL
BGC0000073.1	hlsF	M15	ZDH	MM	Streptomyces halstedii	Actinomycetes	WAVLDTLDLSGSAAVRQGLVRQGIGAATGSALAALAEEGPAPESVVLPAVALPEGAAGARQAACAVLELVQEWLRDSRWDASRLTVVTSGAVAVRPDEDDLPDLAAATVWGLVRTAQSEHPDRFVLVDADERAIGDGSWLPGALSGEPQTAVRAGDLFLARV
BGC0000073.1	hlsF	M16	EDH	MM	Streptomyces halstedii	Actinomycetes	WGVLESPVAGVVAEAAAPTARRGPLDALLADGAVPDVVLLAAAGVDSTPAAAAADARDLVGSVLATVQEWLAAPGTEAARLVVLTRGAVAVGLDDDITDLAAASVWGLLRVAQNEHPDRFVLVDADAAAVASGAVRDAVELDEPQIALRGDTVYVPRV
BGC0000073.1	hlsG	M18	EDH	MM	Streptomyces halstedii	Actinomycetes	WAVLGLPGQEEFTGRVVDGLAARGVTAPVLTGLETPVDPPSFPDVVLLPAGGSGADAGPAVTAVLEQIQEWLESPAAESSLLAVVTRGAVPAEPGEDVPGLAGAAVWGLIRTAQSENPDRFVLVDADAPALARGGLVDAVTAGEPQVAVRGEALRVPRV
BGC0000073.1	hlsB	M4	EDH	MM	Streptomyces halstedii	Actinomycetes	WAILDIAGIGGGETEALADALTVRGVPTEVHPGLEAVPADGQNAPVDVLLPVLTTTAANEADALVSRLLGVLQEWLRRPEPTASRLIVVTRGAIATESDADITDLAAAAVWGLIRTAQLEHPDRFLLVDADQQALTDGSVVDAVRGGEPQTAIRHGELLVPRL
BGC0000073.1	hlsC	M8	EDH	M	Streptomyces halstedii	Actinomycetes	WGILTVPGLTTGTEDVEAGLTLRGVTVSELAGIPVVPSETGPLPQDSRPAPDTVVVPLSFTDNGTAATAVTTTLAVVQQWLASPEWSASRLLVLTRGAVAVEPGEDVTDLAAAAVWGLLRTAQSENPDRFLLVDSDERGIDGGSLLEAVAADEPQIALRDGRIRLPRL
BGC0000073.1	hlsC	M9	EDH	M	Streptomyces halstedii	Actinomycetes	WAVLTRFGAHSAQVLLDGLLANGSTGHVCDDVADAFASDAKPGTVVLPVSRVADPGQDTTEVVSETLAVVQEWLSLPEYAESHLVVVTEGAVAVEAGEDITDLAGAAVWGLIRTAQSENPDRFILVDIDPAGVRDGVLARAVASDEPQLAVRADTLRLPRV
BGC0000074.1	hbmAI	M1	ER	MM	Streptomyces hygroscopicus	Actinomycetes	WTTLGDTHTHADVDAAMDALIAGEDRPGAVVADTTAWAAGDTELPTRARDLAARALDLVQRWLAQPELDDVRLVLLTRGAVSVHDTAEVTDPAAAAIWGLVRSAQSEHPGRIALVDTDDASREALPEAVASGEPQVALRRGLLWVPRL
BGC0000074.1	hbmAI	M2	ER	MA21	Streptomyces hygroscopicus	Actinomycetes	WAALDAVPDQDTWPPVVVADTRAYTAEGGELPERARALTCRALAAIRRLISDDALADSRLVLLTRGGMAVHDDTEVTDPAAAAVWGLVRAAQAEHPGRVCVIDTDDRSAEALPAALATEEPQLALRGGIAWVPRL
BGC0000074.1	hbmAI	M3	A1KR	MM	Streptomyces hygroscopicus	Actinomycetes	WLVAVASPQTSDTAVTGVIAALAAHGADPVVVEVDTVERAEVTALLRERMSGSDDEYAGVLSLLAWDERTCEPGTLSRGVAATVALMQAVEEIGLTAPLWCLTRGAVAVREPSEVTSEFQPLAWGMGVVQGLDQPSTWGGIVDLPRTPDDTALARLCSVLAGVDAEDQVAVRASGVFARRM
BGC0000074.1	hbmAII	M4	EDH	MM	Streptomyces hygroscopicus	Actinomycetes	WGTLGDVSPVLAAAEAPAFADVTEIATAPATEIAGTEDRPALIVADTTAWQSRDADPITRARELATRALDLLQRWVTLPELSETRLAVLTRGAMAVHDSAEVTDSAAAAIWGLVRSAQSEHPGRIQLIDADGHSDHTLRSALSTALTTDQPQLALRDNTLWAPRL
BGC0000074.1	hbmAII	M5	A1KR	MA21	Streptomyces hygroscopicus	Actinomycetes	WLVLVPAVRAGSARVRAVLDGLAARGAEVVAAEVSETGREALGDQVKSADGGAGVVSLLSWDDRADTEYGTVSTGTAATLAAAQALRDHGITAPLWCVTSGGVAVAGETADPVQSAVWGFGAVLGLDHPDTFGGLIDLPAEREGDGEALPDGLFAALSSPEGEDQLAVRADGLFARRM
BGC0000074.1	hbmAIII	M6	ER	M	Streptomyces hygroscopicus	Actinomycetes	WAALGDPATGGAGAMGDTGSAGGALPDVLVADTRAWAEDLTGPPTARARRLTGRLLAEIQRWVADDAMAGTRLAVVTRGAVAVRDDAEVTDPAATAVWGLVRSAQAEHPGRVALVDADGVCEELPAGVWSGEEPQLAVRGGAVWVPRL
BGC0000074.1	hbmAIII	M7	EDH	MM	Streptomyces hygroscopicus	Actinomycetes	WATLGESQLLDSPLHYADVSQVVAAGEQPAALVADVSAWAPENTGPPIDRAHALCARVLDLLRQWVDRPEPADTRLVILTRGAMAVHDTAEVTDAAAAAVWGLVRSAQSEHPGRIQLIDIDEHSHRTLPTALTTTDQPQLALRDATAYTPHL
BGC0000075.1	hgcA	M1	EDH	MM	Streptomyces sp. LZ35	Actinomycetes	SAAPALATLDPVMVTSPAELTTFAAQGDVSPFVRAELTDTTLGLRALTSQALEWVQAWLAAPDSGSRLVIVTREITDPVCAAVWGLVRSAQSEAPDRLVLVAMDEDDASRALLPAALATGEPQIAINAGVASVPRL
BGC0000075.1	hgcA	M3	CKR	M	Streptomyces sp. LZ35	Actinomycetes	WLVVLPYGCQDDDYAAQVVPALNRQGLRTTNLRLDGAETADRTALAETLRSALADREDIGGVLSLLALDQRIRTGSATLTEGVAATLTLVQALGDLGSSGSAGSLSSGHRLYCATRGAVSVGAADGLIAPEQAAVWGLGLAVALEQPDRWGALVDLPEVFDDRATRALLGALADPGDEDQLAIRTTGAFVRRL
BGC0000075.1	hgcB	M4	ER	MA3	Streptomyces sp. LZ35	Actinomycetes	PVPVATAEDIRELAETADLGVPEALLLDLTGDGQEPSASGVREATGRVLELLRTWLAAPELEDTRLLVLTHGAVAVHHDRELTDPTAAAVCGLLRSAQAENPGRITLADTDRSQASLALLPSVFTGGEPQLALRDGIRYARRL
BGC0000075.1	hgcC	M5	EDH	M	Streptomyces sp. LZ35	Actinomycetes	GTVRVTTAEDVRALAERGDRFDAMTVEVTDAGSVRELTSRVLEVVQAWSTEPALDSTRLVVLTTGAVAVDPGEPVDPAIAAVWGLVGTAQSENTGRILLMDVDSEPSSYAALSTVVPALFVADETQAAIRAGTCFLRRL
BGC0000075.1	hgcD	M6	ER	MM	Streptomyces sp. LZ35	Actinomycetes	TVSVHTAQDVRQLASRADAPPAAESAEAPPVLLYEIGSGDAVSDDTSVAAVHELTGQVLDVLQTWLTEPTLEDTRLVVLTQGAVGVRDADPIDPAAAAAWGLVGTAQSENPGRILLIDVDDTPASAKALPALLPTLLTGDEPQLALRGGVCHLRRL
BGC0000075.1	hgcE	M8	ZDH	M	Streptomyces sp. LZ35	Actinomycetes	EPVPVADAEDVHRLVTTPETSPPDVLLLDLGGGVGGGSADVRELTGRALRVVQTWLEEPSLASSRLVVVTRGAVAVRESDPVDPAMAAVWGLMGSAQAENPGRILLLDIDQGTIPTPLLPALLGGDQHQLALRDTTCFTRHL
BGC0000078.1	idnP1	M1	EDH	MM	Streptomyces sp. ML694-90F3	Actinomycetes	WTLADPDPDADPYGLTAVFGSPAGAGEPAALGLLPVAGDPALDPVPALHDLTERLLERLRRHLADPEAPHLVVVTRGAVATAPGADVTDSAAAAAWGLVRSAQAEEPGRITVVDTDGTPVPDTARLIAGIAAAVAAGEHQLAVRDGALLVPRV
BGC0000078.1	idnP5	M10	EDH	MA21	Streptomyces sp. ML694-90F3	Actinomycetes	WAVVGTDPAVAATALRSTGLTVDEYADVTALLASGDRPGAVLLDRTNALSSGALGALEDAAAAGAAGAARAAGAAGTSGASGLLGDAAAATHTATATALADVRGWLGAEHPVAAPLVLLTRGAAALDGEDVTDPAGAAVRGLLRSAQSENPDRVVLVDVDDHPASLRLLPAVLAGGEPQALLREGEAYGGRL
BGC0000078.1	idnP1	M2	EDH	M	Streptomyces sp. ML694-90F3	Actinomycetes	WAVVGDLAVPDADTHPDLAALLATGTVPAVVVHAPRPPAAAEAPPEAVRTATESLLALLKEWLADDRCAGARLVVVLTGSPLVDGALAGLVRAAQAEHPERIVLAHAAGGDIGRLREAVASGEPEVALRDGRTLAPRL
BGC0000078.1	idnP2	M3	EDH	MM	Streptomyces sp. ML694-90F3	Actinomycetes	WAVLAPEGDALAAEISAATGAPRATVLDEAAGADVVVLPVRGGTGPDEIRRAAAGTLAALQEWLADDRFTHATLVVAVRGALDGDPAAAAAWGLVRTARIEEPGRFLLADLDHDPASARALTAAVALAEPETALRDGGLHLPRL
BGC0000078.1	idnP2	M4	EDH	M	Streptomyces sp. ML694-90F3	Actinomycetes	LAVVDDLKELHDPDRPDAPVTGVVVLRLGTPERPGVPEAARAATARALDAVRAWLADERFAGARLALLTEDAVAGPEAPAPVLAPVWGLVRAAQAEHPGRFLLVDASAGAPVTDEALRRALGTGEPETAIGGDPAVRVPRW
BGC0000078.1	idnP2	M5	ZDH	M	Streptomyces sp. ML694-90F3	Actinomycetes	WAVLGDDLLGLGLPVHPAPDALPDPAPAVLVHHCPPGEGPVPDAVRDATLRLTGTLTDWLAAPHAAATRLVVTLGTGLDRAPLAGLVRAAAAEHPGRIVLVHLPEPEPESGAESGAGAHGTDLVRRLAAAVATGEPELTLTDGDPTAPRL
BGC0000078.1	idnP4	M6	A1KR	MM	Streptomyces sp. ML694-90F3	Actinomycetes	WLVALPAESGAGADRAAAVADGLRERGAAVVTIAGTDGAPDRAALADRLRAAAGDTPPAGVLSLLALGPDGPDAPDASEDGTEPGLPRVTEHTLALVQALADAAVDAPLWCVTSGAVAVDPYEDAEPAAATLWGLGTVLGLDLPDTAWGGLVDLDPGTHEDGGLYGVIGGTTGRGENAVALRSGGAFARRM
BGC0000078.1	idnP3	M7	EDH	M	Streptomyces sp. ML694-90F3	Actinomycetes	VALVEFADAETAPAGLSAEAAASRAVLLRIASGADAADADESADAVADAVDTATRRTLAALQALLGSGDDTLVVVTRGAVADGDGAPEDLAGAAVGGLVRAAQAEHPGRILLVDTDGTADVTGAAVAAALAAGEPQIAVRAGADASTVRVPRL
BGC0000078.1	idnP3	M8	EDH	M	Streptomyces sp. ML694-90F3	Actinomycetes	WSVLGPDRWGLADAIGAPVTTGLDGAGTLVLPCGAADPGEMTAEAVHSETARVLEILSTWLTEERFADRRLVVVTRGAVADDATGGGTGGDLVGAAVRGLVRSAQAENPDRIVLVDLAADGPPPGAARFAAAAGTGEPEVALRGDSLRLPRL
BGC0000078.1	idnP5	M9	EDH	MM	Streptomyces sp. ML694-90F3	Actinomycetes	PAVSDGAPDGASDAAFDAALGAARDGAEPDAVVLRLTGGTGPDAVRAATARALAAVQYWTGGEGPRTARLVVLTTGAVALPGEDATDHAAAAALGLARSAQSENPGRIVLVDTDDEPAARTALPGLLALGESAYALRDGTVHVPRL
BGC0000079.1	idmP	M10	A1KR	MM	Streptomyces antibioticus	Actinomycetes	WLVIAPAAHQEHPWVTAATESLRDGGAEVRTVVLDPTALQRDSLAQELGTDGAQIDGVLSLLALDETPLPRHPGVPAGLGATLTLLQALGDAGIEAPLWCATQGAVSVSGVDHLTRPLQAQVWGLGRVAGLEHPDRWGGLVDLPETVDARSAGRLRALLAEPGDEDQLALRPSGAFVRRL
BGC0000079.1	idmL	M2	AKR	M	Streptomyces antibioticus	Actinomycetes	WLVLTSTHTADHPWTQHAVDALAERGAHVVHLPVDPARADRTALADLLTGATGDRPERGGVLSLLALDETPHPEHPDLAAGVTATLTLAQALGDADIDLPLWCVTQGAVTVGGTDLVRRPEQAQIWGLGRVVGLEHPHRWGGLVDLPEQPDPHAVRHLCAALGARGPEDQLAVRATGTLVRRL
BGC0000079.1	idmL	M3	ER	MA3	Streptomyces antibioticus	Actinomycetes	WTVLDEGAAGPDAESLPEFVVLPCGTGASEPASGASGGLTHAVRQATAGMLTFLQQWLSEERCTDSRLVVVTRGALGATPGDAVPDLAHAPVWGLVRSAQTENPGRFVLVDLEAGTDADAALAEVLPRVLGSGEPQVVVRAGRVLAARL
BGC0000079.1	idmM	M4	EDH	M	Streptomyces antibioticus	Actinomycetes	PAATATPRYDVLVCTPASQLVDEDVPELVRETTADVLRALQGALADESPEPTRLIVVTRGAVSTGADDALRDPAHASVWGLVRSAQAEHPGRFVLVDVDVDVHEHVHEDEREGEDEGGGEGGGHGWGALLPAVLATGEPQIAVRQGALLAPRL
BGC0000079.1	idmM	M5	EDH	M	Streptomyces antibioticus	Actinomycetes	PAHWTPLGADEHQVVEKQAEFVVLPWTPPTDADDLPGAVREVTGQVLEAVRRWLSDEYQDQHQDQDQDQNQDQNQGQPQDGASAASKLVVVTHGAVSAGPDDPVPDLAHAAVWGLVRSAQSEHPGRFVLVDIDERDDWQSVLGSALRRDEPQMVVRGGTVLTPRL
BGC0000079.1	idmN	M6	EDH	M	Streptomyces antibioticus	Actinomycetes	PEPERTWAVLGRDGRGLDELAQDADTYPAFVVFPCVTTVTATATDDLTATDDLATATDDLTATDDLAAATDDSTVIDGLAVAARAATVQALELVRRWLSDERYADSQLVVVTSGAVATSSDAPVADLVHAPVWGLVRSAQAEHPGRFVLVDVDADGDGDGDGDGDVDPASDGREGWEAVLPAALAAGEAQLAVRDGRILSPRL
BGC0000079.1	idmN	M7	EDH	MA3	Streptomyces antibioticus	Actinomycetes	ADAHWAVLGGEELAGAEPYPEYVVLPCTPVRCGDLADVVHDVTGEVLTAIQDWLSDPAATRSRLVVVTRGAVGVGTDDVSDLSHAAAWGLVRSAQTENPDRFVLVDVDDATDWEPVLSSVLAVGETQMAVRGGTVLTPRL
BGC0000079.1	idmN	M8	A1KR	MM	Streptomyces antibioticus	Actinomycetes	WLVVAPAAHREHPWVTAATDALRDGGAEVRTVVLDAAEAERVAWTQELSATAAPAASGVLSLLALDETPLPRHPGVAAGLGATLTLLQALGDAGIEAPLWCATQGAVSVSSIDPGPHPLQAQVWGLGRVAGLETPQRWGGLLDLPETPDPRSAGRLCTAVADSGDEDQLALRGSGVFVRRL
BGC0000079.1	idmO	M9	ER	M	Streptomyces antibioticus	Actinomycetes	WTLLGGADAGVGLDVAGAFASLEPSDGAPEFVVLPCVPPTSPTRAADVRQSTLQALTVLQNWVTDERHADSRLVLVTRRAVGVGAHDDVPDLTHAALWGLVRSAQTENPGRFLLVDLDEGAELAEVLPGALGSGESQVAVRAGRVLAARL
BGC0000080.1	jerB	M1	B2KR	MM	Sorangium cellulosum	Myxococcota	HVVLGGGGALAAGLGALALAGLPELLEALENRAAAPERLVLDLTEGRPGAVAESVHATTRDALALVQAWLAAPRLSGTELVVVTREAVAAGPDEGVAALGPAAVWGLLRTARVEHPERAVRAVDLGREPLDVAVLRRALGAVAEPELALRAGGARAARL
BGC0000080.1	jerB	M2	ER	M	Sorangium cellulosum	Myxococcota	HVVVGGDGALAAALGARVVAGLPELLASLPDGAAAPRRLVVDLTADAAGAVVDAVHAAARDALSLVQGWLAAPQLAATELVVVTRGAVAVAPDEGVAALGPAAVWGLLRATRVEHADRTVRVLDLGSAAPDMTLLRRALTAAEEPELALRAGGARAPRL
BGC0000080.1	jerD	M5	EDH	M	Sorangium cellulosum	Myxococcota	HVVLGGDGALASALGVRAAAGLPELLEALADGAAAPRRLVVDLTAGDAGAVVAAVHAAARGALALVQGWLAAPQLTATELLVVTRCAVATGPDEGVDALGPAAVWGLLRATRAEHPDRAVRVLDLGREPLDGALLRRALAAVAEPELSLRRGEARAPRL
BGC0000080.1	jerE	M6	AKR	M	Sorangium cellulosum	Myxococcota	WLFLAPPDHAKDDLARAVLRALAESGATVVPVLVAEGDVDRALLSARLREQVGDGGAIRGVISLLALDETSLPQHDGLPRGLAFTLALVQALGDTAIAAPLWLLTRGAVSVGRSDRLERPLQALTWGLGRVVALEHPERWGGLIDLAGALDEKALKRLVAALGGRDAEDQLALRPSGLFARRL
BGC0000082.1	KijS1	M1	EDH	MM	Actinomadura kijaniata	Actinomycetes	WAALGDAALDVARAAGLPADAYPDLAALREAVAGGAAAPALVLAGPAAGDGVPPDAAAHATAGRTLALLQEWLADERLDAARLVVVTRDAVAAVPGSDVPSPADAAVWGLVRSAQTEHPGRFVLLDLDGDAASARAVAAVAASGEPQTAVRAGEARVPRL
BGC0000082.1	KijS4	M10	EDH	MM	Actinomadura kijaniata	Actinomycetes	LAFVGDTGVPDVRSERHEDLDALRAAVADGAPPPQAVVMACPGGVTADPAADAHAATRRALELVQRWSADETFAASSLVLVSRGAVPGGGREDVTDLAAAAVWGLVRSAQSENPFRFQLVDVDAGTTEDALAAALALGEPQAAIRGGKVRLPRL
BGC0000082.1	KijS1	M2	EDH	M	Actinomadura kijaniata	Actinomycetes	PPDADPRELTGPLPDPVLVDCSAPDGGNGPEAAHALAERALELTRWWLADERSAASRLVFLTRGAVSTGPDDGTADPAGAAVWGLVRSAQLEHPGRFVLLDVDGDDASARALGAAVASGEPQLAIRNGRCHAPRL
BGC0000082.1	KijS1	M3	EDH	MM	Actinomadura kijaniata	Actinomycetes	AVLLGADVFATGLPVRAGLADVLAGPAPVPEAVVAVLAADGGADPVARAHSLVERALALVREWLAEERAADSRLVVLTRGAVAAVPDDEITDLPAAAVWGLVRSAQAEHPGRFVLADLDGSEASARSLAEALALDEPQVALRDGEPLVARL
BGC0000082.1	KijS2	M4	0DH-BKR	M	Actinomadura kijaniata	Actinomycetes	WAILGDGAAAFPGERVPDLAALGDLVEAGAAAPDTVLAPCPAGEPETLTVRTLELLRSWLADDRFTGARLVVLTRNAVAVRADDRIDDLGQAAVWGLLRSAQAEHPGRFVIVDLDDDATATPVRAALATDETQLAVRDGVPHAARL
BGC0000082.1	KijS2	M5	EDH	MM	Actinomadura kijaniata	Actinomycetes	WAVLGDAVADLPRYRELDDLVRAMDAGTPAPEVVLLPCHAGPPEDDDPVAAAHDVTRRVLGLVQDWLAEERLAASRLVVLTRGAVPVDADDPVRDLAAATAWGLLRAAWWEEPDRFALVDLDGTDASARALGAAVRTGEPQVVLRDGEPHLPRL
BGC0000082.1	KijS2	M6	EDH	M	Actinomadura kijaniata	Actinomycetes	EPDADVEILPVVPSGDTSETVARVLLRMREWLAEEDPARSRLVVVTRNAVVTGPEDTVVDPAAAAVWGLVRSAQNEHPGRFVLVDLDGSEDGSEASDLSLPSALALDEPQIALRDGRRLTPRV
BGC0000082.1	KijS2	M7	EDH	M	Actinomadura kijaniata	Actinomycetes	VRIGAFDDVAGPPAPTGAPTPDVLLLDCAALHAESRDAAGRTRAATRLVLAAVQRFLADDRFAGSRLGVLTRSAVAAVDGDTVEDLAGAAIGGLVRSAQTENPGRIVLVDTDGTEASARALPAALGSEEPVLALRDGRVHAARL
BGC0000082.1	KijS3	M8	0DH-B1KR	MM	Actinomadura kijaniata	Actinomycetes	VGAPRGDLADLLAAPAGTGVPGVLTLAVPPSDGSGPAAAHATAERVLRMIQQWLEQDRFADSRLVVLTRRAVSTGPGDPVAYLPAAAVWGLVRSAQNEHPDRLVLLDHDGTGSSDRAVDAALGTGEPQLALRDGVCLVPRL
BGC0000082.1	KijS4	M9	ER	MM	Actinomadura kijaniata	Actinomycetes	WAVLGAAPEGLGDGVRRVTDLESLPAEVPATVVTFVGSGDTGGTPVEDAHATTHRVHGLVRRWLADERFENSRLVVVTERAVAVRAGEHVTGLAAAPAWGFLRVAQSEHPDRFGLVDLDGRDGSLRRLREALATDEPQLALRDGEMFAARL
BGC0000084.1	ladSVII	M10	A1KR	MM	Streptomyces sp. CS684	Actinomycetes	WLLFVPEAQADHPAVRATAEALQEHGAVVRLHAVETGRVRCESLASVDTSGLAGIVNLLALDEEPHPEHPAVPAGLAATTTLIQALNDNNTTTPLHTITQGAVSTNATDPLTNPLQAHVWGLGRVAALDLPRLWAGLIDLPPHIDHHTLTRLATTLTPQDEDQTAIRTTGTHHRRL
BGC0000084.1	ladSVIII	M11	A1KR	MM	Streptomyces sp. CS684	Actinomycetes	WLLLVPAAHAEHPAVLATAQTLASHGAEVRRHVVDARAVERAGFARELLSLTGGEPYAGIVNLLALDEEPHPEHPAVPAGLAATTTLIQALNDNNTTTPLHTITQGAVSTNATDPLTNPLQAHVWGLGRVAALEHPRLWAGLIDLPPHIDHHTLTRLATTLTPQDEDQTAIRTTGTHHRRL
BGC0000084.1	ladSVIII	M12	0DH-B2KR	MM	Streptomyces sp. CS684	Actinomycetes	SAVIALPGEPLAVELAGVLGGAPVRETFGALRAEVAEGADAPDAVLAVYVTPEEGAYDAAEFARQAALGLLALLKEWVADAAFETSRLVVVTQGAVAARPGEEAGDLPGAALWGLVRSAHAENPGRLTLLDVDELPASLEAVPAALASGEPELALRAGQAYVPRL
BGC0000084.1	ladSII	M2	ER	MM	Streptomyces sp. CS684	Actinomycetes	SAVLGDLDLGVDRYPDLAALVGATASGAAVPDLVFAGVDTLAGDELHVTEQVLALVQDFLSAPRLDRARLVLVTRGAVDADDPADGTGAPEGPDLAGAAVWGLVRSAQSENPGRLVLLDADGPLDRDAVADAVRGAGGVDEPQLASRGGRVLVPRW
BGC0000084.1	ladSIII	M3	EDH	M	Streptomyces sp. CS684	Actinomycetes	WAVLGAEGTDLVPGTHHRDLAALTAAVAAGDPVPDLVLAPVLPTGPDDVPARARAHAHATLNLLRDWLTSDTLAPARLVVLTTGAVAAHPDDAPADLATAPLWGLVRAAQAEQPDRILLLDIDQDAATRRTVPAAVSAATAQAETELALRAGTALVPRL
BGC0000084.1	ladSIII	M4	ER	MM	Streptomyces sp. CS684	Actinomycetes	WVMLADGEGLAGVVRDDGDVPWAVVVPVEAGDGLATAGRALALVQEFLAVPELADSRLVLVTRGAVATVDGSDVDPAAASVWGLVRSAQSEHPGRFALVDADGDDLPPAVLRHVVEKQDEPQLALRDGGVLVPRM
BGC0000084.1	ladSIV	M5	EDH	MM	Streptomyces sp. CS684	Actinomycetes	WVALGQNGSGLADLMASVEAGDPAPPLVAAPVEHGADEDGLTLAAQILDLAQNWLACSQLSDSRLVLVTTGATAADDDTEVDAAAAAVWGLIRSAQSENPGRFTLIDLGPDDTLATAVAAARHVDEPQLAVRADEIRVPRL
BGC0000084.1	ladSIV	M6	ER	M	Streptomyces sp. CS684	Actinomycetes	WIMLADGEGLAGVVRDDGDAPWAVVAPVVAGDGPATAEWALSLVQEFLAVPELADSRLVLVTRGAVATDPGADVDPAAASVWGLVRSAQSEHPGRFALVDADSDDLPQAALRHVIEEQDEPQLALCEGHICVPRL
BGC0000084.1	ladSV	M7	EDH	MM	Streptomyces sp. CS684	Actinomycetes	WAVLGQDVPAWAGADLPRHEDLAALLENGAPAPGTVLVEAPPTSDTSTSAVEARGRAVAERTLRLVQDWLAEPRLTDSRLVLLTHHAVAVPTADEPGDVDASAAALWGLVRSAQSEHPDRFVLLDVADGQGTDRETVARALASDEPQLAVRAGRVVAPRL
BGC0000084.1	ladSV	M8	ER	M	Streptomyces sp. CS684	Actinomycetes	WVGMADVLRSGEDAPWAVVAPVEAGDGLAMAEQALSLVQEFLAAPELADSRLVLVTRGAVATDDGDVDPAAASVWGLVRSAQSEHPGRFVLVDADGDDLPQAALRHAVEELDEPQLALRDGTLLIPRL
BGC0000084.1	ladSVI	M9	CKR	M	Streptomyces sp. CS684	Actinomycetes	WLVVAPSQGADAWTGACLSVLEEAGIPATLVEAGPDPKRAELADLLRQAELPDGAAPAGVLSLLALTERPAEATLALVQALLDAGLSAPLWCATRGAVSCADTDPVVSPAQAAVWGLGRVAALEHPELWGGLVDLPADPAELAAGPLRAVLYGDAGEDQVVLRPAGALGRRL
BGC0000085.1	lkmAI	M1	B2KR	MM	Streptomyces rochei	Actinomycetes	WLLVRYDGAAEPAARAARAALEVAGATVTDLVVAGAPAPDALALELLRAAEGADRIGVLSLLAVDERGEGAATPLGLPSLGGTVALARALAGSGLDGLLWCLTEDVQVTSADERPGDPAREALWGLGRVIALEHPGLWGGLIDVPAGSTAELTRSLAGVLTGGSGEDQLALRPAGVFARRW
BGC0000085.1	lkmAI	M2	A1KR	MM	Streptomyces rochei	Actinomycetes	WLLLLPAPSGTGPGRPVWYEAAATALAEHGARPHPVTVPLDDPQALTTAVRDALATEAASGAYAGVLSLLALDDADTGAEATLGLLRELAAADADTPVWLATCGAVGTGADDPVTCPAGAQVWGLGQAAALERGARHTGLVDLPPEATETQRALFARALTGTEDQLAIRAQAVLARRL
BGC0000085.1	lkmAII	M3	C2KR	MM	Streptomyces rochei	Actinomycetes	WLIVGPAASPAWAGLLPAAVREAGGTPLECALDPGLDRAGAAAALTAALAGTTGVRGVLSLLAADESDHPGRPGVPVGAVATLTLAQALADAGVDAPLWCLTRGAVQTDEDDGIGSYAQNAVHGLGRVAGLELGRRWGGVLDLPHPDGADAALLGRVPGLLAGAHAAEDHLALRPGGLYGRRL
BGC0000085.1	lkmAII	M4	ER	MM	Streptomyces rochei	Actinomycetes	ATIGGPCGLGKDHPDLAALAAAVAAGEPEPEAVVVPCRPWQAADPAGSVRESVLHAAGLVRQWLDAPERTGRLVFLTRNAVSTGPADTAADPAQAAVWGLVRSAQAESPGNFALVDIADGADPAVLAALPAVLDHPQLAVRGDLALVPRL
BGC0000085.1	lkmAIII	M5	A1KR	MM	Streptomyces rochei	Actinomycetes	VLLVTGRRVPDAWYDTVRAALQDAGATVGTVDCDAPERAATAAALRAATAAGEPAAVVSLLALDIAGESADDTAGDSAAAPHLPAWRTLSLMQALGDAGVEAPLWVLTRRAVAVTEQDGEPDPAQTAVAGLGRAAGLEHPARWGGSIDLPAPDRDLLARLPWVLADPRDEDQVALRASGDRVPRL
BGC0000085.1	lkmAIII	M6	A1KR	MM	Streptomyces rochei	Actinomycetes	YLVVGTGTGPQEDTLAGAVEDAGGTVLRLTADAVATGREELARTLREAAPGGVTAVVSLLALAADPSDPSGPNDPSGPNDPSGPDDELRAATAALTLHQALGDAGVEAPLWLVTRGAVAVGQDAADATADPAQAMVWGIGRVMGLEAPGRWGGLLDLPGELTPSVLRWFTACLQQAGDEDQLALREGGCFVRRL
BGC0000086.1	lsd11	M1	EDH	MA3	Streptomyces lasaliensis	Actinomycetes	CAVIGRNAGPEFGASVRAYGSVAELVSALDAGEPVPELVLLPVTAPTGEEEVAAAARHTAERVLGVAQEWLASEHTESSRLVVVTRGAVAVGGESGRVDLALAPVWGLLRSAQAESPGRFVLVDVEAEGGSLAAGGASVAAGEASVKANGGSPEADGGSQEEGSGSVVAAVAAVLATDEPQLAVRGGEVRVPRL
BGC0000086.1	lsd11	M2	ER	M	Streptomyces lasaliensis	Actinomycetes	WAVITAAASELAVVLGEARDSLRTCSDLSALRAAVGGGEPVPEAVVLPYVTPHPADGDGLPAEVHRATRQALADVQTWLADEALDDSRLVVVTRRAVATHAGEDVGDLVHAGVWGLLRSAQSEHPGRLFLLDLDDDPASYAALPEAVASAEPQLAVRQGAMLVPRL
BGC0000086.1	lsd12	M3	EDH	MA3	Streptomyces lasaliensis	Actinomycetes	WVAIGADAPATRAVAASYPDVDALVAALDSGAGVPEVALLFCGPGRGGAVTDEVRQGTSALLDAVRTWLADDRFDASRLVVVTRGAVAVLPGEGVDDLAQAALWGLVRSAQSENPGRFLLLDSDTDVPEEAVRRLAASGDEQAALREGALLTPRL
BGC0000086.1	lsd12	M4	ER	MM	Streptomyces lasaliensis	Actinomycetes	VPLDEVSDDSAEVPETVLLSCADATADAADAASGIADVVDGVRRAAHELLHRVQAWLSDARFASSRLVVLTRGAVAASPEDRTTDLVTAPLWGLIRSAQAENPGRFVLLDTDGTEASAAVLAGAAASDESQLALRDGAVLVPRL
BGC0000086.1	lsd12	M5	A1KR	MA3	Streptomyces lasaliensis	Actinomycetes	WLLVTGPERSGEAWSAVVARAMASRGAQVSTLSVDAAGLDRETLRERIREHLADSEQPVGVLSLLACGAGTAESGRPGVPSALATTVALVQALGDAGVDAPLWCVTSGAVSVSATEYALPEQAAVAGLGRVVALEQPQRWGGTIDLPGQLGDVDDQVAVRLVGVLAEHGDEDQLAVRASGVFGRRL
BGC0000086.1	lsd14	M7	B2KR	MM	Streptomyces lasaliensis	Actinomycetes	WLVVVPESLAGGGWPVVVARAVDQAGGRPVVLSVDAADGADRSRLGLRIHEALGEGPVPDAVVSLLALDPSALPGLPDVPQALASTAALVQALLDLGLEARLWCVTSGAVSVSGADGPSAPEQAAVWGFGRVAGLEHPHLWAGLVDLPPEADERTAARLVGVLAGAGGEDQVALRSSGVFVRRL
BGC0000086.1	lsd15	M8	ER	M	Streptomyces lasaliensis	Actinomycetes	LAALGDTDGEDGTVTAFADLDALHTAVESGSTVADTVLYVLPRSAEADDTAGAAHALARTALEAAQAWLARDLVDGPSCLVVLTHGAVGVRGTEPVTGLGQSAVWGLLRSAQSENPGRFALIDVGTGRDNGAGADADVDAGYAVLPDAITALQDSDVAQMAVRGGELFAPRL
BGC0000090.1	mbcAI	M1	ER	MM	Actinosynnema pretiosum subsp. pretiosum	Actinomycetes	VAAGGSWPEVADTRDWEAAADLPTRSRELAARALELVQDRLAGVDGAPLLVITTGAVAVADDAEVTDPAAAAVWGLLRSAQSEHPGRFALVDVDGGAAAEVAALVPGDEPQTALRGGLVRAPRL
BGC0000090.1	mbcAI	M2	ER	MA21	Actinosynnema pretiosum subsp. pretiosum	Actinomycetes	PAVLDTRAWELPEGVGRAEAITTRVLAELQAELDGTATLVVVTRGAVAVHDDAEVTDPAAAAVWGLVRAAQAEEPGRVAVVDVDDASEAALDAAAHAAGAEPQLALRGGAAFAPRL
BGC0000090.1	mbcAI	M3	A1KR	MM	Actinosynnema pretiosum subsp. pretiosum	Actinomycetes	WLVVVPEALADDTSVAEVAAALAARGATPRIVAAGPDLGPDLGDEPDGVLSLLAWDDRPAGGGTLSRGVVDAVGLVREAVRRGWSAPLWCATLGAVAVADPGEVTAEFGPQLWGTGVVLGLDLPDTWGGLVDLPARPDGVALDLLCAVVAGAGDEDQLAVRPAGVFARRM
BGC0000090.1	mbcAII	M4	EDH	MM	Actinosynnema pretiosum subsp. pretiosum	Actinomycetes	WVLLGGPSGHAGFAALPVFADPAAVAALPEGDRPAVVVVDTTACREPGRDVPGAARAFVVRALELLVAWLREDALAGTRLVLVTSGAVPVRADAEVTDPAAAAVWGLPRSAQSEHPDRVWLLDVDEPGAAPGALASPEPQLAVRAGAGFAPRL
BGC0000090.1	mbcAII	M5	A1KR	MM	Actinosynnema pretiosum subsp. pretiosum	Actinomycetes	VAVVVPANDERARAVAGGLVARGVDVTVVAAVDATRDGLAKALPDRPDAVVSLLSWDAGADEPGAPGSATAALVQALADRGATGPLWCATGGAVSVAGEDADPDQAAVWGLGGVLALDLPEAFGGLVDLPRQPTDADLDAFAAALTAPGGEDQLAVRDGRLLARRL
BGC0000090.1	mbcAIII	M6	ER	M	Actinosynnema pretiosum subsp. pretiosum	Actinomycetes	TPAGGTTTAVVVVDTRSVDAPDDGPARARALTAHVLAELQRHADDDRPVVVVTSGAVAVRVDGEVTDPASTAVWGLVRAAQVEQPDRVRLVDVEPGADPVLTSPEPQVALRGGTAHVPRL
BGC0000090.1	mbcAIII	M7	EDH	MM	Actinosynnema pretiosum subsp. pretiosum	Actinomycetes	WAVLGSERHPDVDAYAADPDRPGALLVDVGAWLGGDDAVARAHALTSAALELVRDWATRGDLGGERLVLVTTGAEDVRDTAPRDPAQAAVWGLARSARSEHPDRFALVDADDRSPATLALAAGSAFPEVVLRGERAHAPRL
BGC0000092.1	megAI	M1	B2KR	MM	Micromonospora megalomicea subsp. nigra	Actinomycetes	WLLATYPGRADDRVEAARQALESAGARVEDLVVEPRTGRVDLVRRLDAVGPVAGVLCLFAVAEPAAEHSPLAVTSLSDTLDLTQAVAGSGRECPIWVVTENAVAVGPFERLRDPAHGALWALGRVVALENPAVWGGLVDVPSGSVAELSRHLGTTLSGAGEDQVALRPDGTYARRW
BGC0000092.1	megAI	M2	A1KR	MM	Micromonospora megalomicea subsp. nigra	Actinomycetes	WLVVVPEGYTDDGWVVEVRAALAAGGAEPVVTTVEEVTDRVGDSDAVVSMLGLADDGAAETLALLRRLDAQASTTPLWVVTVGAVAPAGPVQRPEQATVWGLALVASLERGHRWTGLLDLPQTPDPQLRPRLVEALAGAEDQVAVRADAVHARRI
BGC0000092.1	megAII	M4	ER	MM	Micromonospora megalomicea subsp. nigra	Actinomycetes	VAADGLDDLLRAGGPAPQAVVVRYRPDGDDPTAEARHGVLWAATLVRRWLDDDRWPATTLVVATSAGVEVSPGDDVPRPGAAAVWGVLRCAQAESPDRFVLVDGDPETPPAVPDNPQLAVRDGAVFVPRL
BGC0000092.1	megAIII	M5	A1KR	MM	Micromonospora megalomicea subsp. nigra	Actinomycetes	VLVVTGAAVPPAWTDVVRDGLEQRGATVVLCTAQSRARIGAALDAVDGTALSTVVSLLALAEGGAVDDPSLDTLALVQALGAAGIDVPLWLVTRDAAAVTVGDDVDPAQAMVGGLGRVVGVESPARWGGLVDLREADADSARSLAAILADPRGEEQFAIRPDGVTVARL
BGC0000092.1	megAIII	M6	A1KR	MM	Micromonospora megalomicea subsp. nigra	Actinomycetes	YLVFGDAPETLGHSVEKAGGLLVPVAAPDRESLAVALDEAAGRLAGVLSFAADTATHLARHRLLGEADVEAPLWLVTSGGVALDDHDPIDCDQAMVWGIGRVMGLETPHRWGGLVDVTVEPTAEDGVVFAALLAADDHEDQVALRDGIRHGRRL
BGC0000094.1	pikAI	M1	DHT-B2KR	MM	Streptomyces venezuelae	Actinomycetes	WLAVTPEDHSAQAAAVLTALVDAGAKVEVLTAGADDDREALAARLTALTTGDGFTGVVSLLDGLVPQVAWVQALGDAGIKAPLWSVTQGAVSVGRLDTPADPDRAMLWGLGRVVALEHPERWAGLVDLPAQPDAAALAHLVTALSGATGEDQIAIRTTGLHARRL
BGC0000094.1	pikAI	M2	EDH	M	Streptomyces venezuelae	Actinomycetes	YGPTAVLGKDELKVAAALESAGVEVGLYPDLAALSQDVAAGAPAPRTVLAPLPAGPADGGAEGVRGTVARTLELLQAWLADEHLAGTRLLLVTRGAVRDPEGSGADDGGEDLSHAAAWGLVRTAQTENPGRFGLLDLADDASSYRTLPSVLSDAGLRDEPQLALHDGTIRLARL
BGC0000094.1	pikAII	M3	C2KR	MM	Streptomyces venezuelae	Actinomycetes	WLVVVPEDRSAEAAPVLAALSGAGADPVQLDVSPLGDRQRLAATLGEALAAAGGAVDGVLSLLAWDESAHPGHPAPFTRGTGATLTLVQALEDAGVAAPLWCVTHGAVSVGRADHVTSPAQAMVWGMGRVAALEHPERWGGLIDLPSDADRAALDRMTTVLAGGTGEDQVAVRASGLLARRL
BGC0000094.1	pikAII	M4	ER	MM	Streptomyces venezuelae	Actinomycetes	VVLGGDADGLAAALRAGGTEVLSFPDLTDLVEAVDRGETPAPATVLVACPAAGPDGPEHVREALHGSLALMQAWLADERFTDGRLVLVTRDAVAARSGDGLRSTGQAAVWGLGRSAQTESPGRFVLLDLAGEARTAGDATAGDGLTTGDATVGGTSGDAALGSALATALGSGEPQLALRDGALLVPRL
BGC0000094.1	pikAIII	M5	A1KR	MM	Streptomyces venezuelae	Actinomycetes	WIVAVGSEPEAELLGALKAAGAEVDVLEAGADDDREALAARLTALTTGDGFTGVVSLLDDLVPQVAWVQALGDAGIKAPLWSVTQGAVSVGRLDTPADPDRAMLWGLGRVVALEHPERWAGLVDLPAQPDAAALAHLVTALSGATGEDQIAIRTTGLHARRL
BGC0000100.1	monAI	M1	0DH-C2KR	MM	Streptomyces cinnamonensis	Actinomycetes	WAGLGECGERWECVGRVERWYEDLDALGAAVEGGASVPSVVLATAAAAPGGAGDGAADALSAVRWTGALLDQWLADARFADARLVVITSGAVATGDDFLPDPAAAAVRGLVEQAQVRHPGRILLVDTEAGAGLGVGAGVDDALLEQAVAMALGADEPQLALRAGRVLAPRL
BGC0000100.1	monAVII	M10	A1KR	MM	Streptomyces cinnamonensis	Actinomycetes	WLLFVPADKAEHPAVRATAEALSEHGAAAVRLHPVETGRAGRQELAAVDTAGLAGIVNLLALDEEPHPEHPAVPAGLAATTALLQALGDNGTTAPLHTVTQGAVSTGATDPLTHPLQAHVWGLGRVAALEHPRLWAGLVDLPARIDRHTLPRLAAALLPQDDEDQTAVRPTGIHHRRL
BGC0000100.1	monAVIII	M11	A1KR	MM	Streptomyces cinnamonensis	Actinomycetes	WLLLVPAAHADHPAVLATAQTLTAHGGEVRRHVVDARAMERTELAQELRVLMDGAAFAGVVNLLALDEEPHPEHSAVPAGLAATTALVQALADNGADIAVRTLTQGAVSTSAGDALTHPVQAQVWGLGRVAALEYPRLWGGLVDLPARIDHQTLARLAAALVPQDEDQISIRPSGVHARRL
BGC0000100.1	monAVIII	M12	0ER-0DH-B2KR	MM	Streptomyces cinnamonensis	Actinomycetes	AAVLAPVESGPMGGTSAGALADALSDALAAGPVWDTFGALRDGVAAGGEAPDVVLAVCAAPGAGAGAVADADGRGGDPAGYARLATVSLLSLLKEWVDDPAFAATRLVVVTRGAVAARPGETAGDLAGASLWGLVRSAQAENPGRLTLLDVDGLESSPATLTGVLASGEPELALRDGRAYVPRL
BGC0000100.1	monAII	M2	ER	MM	Streptomyces cinnamonensis	Actinomycetes	CAVLGELVAEPGPGIDLEGCPCYPGVGALADNASPPSMILAPVHSDTTGGDGLALTERVLRVIQDFLAAPSLEQKQTRLAFVTRGAADTGSTTGGSAAPAEAVDPAVAAVWGLVRSAQSENPGRFVLLDTDAPLDQASVAPLVDAVRSAVEADEPQVALRGGRLLVPRW
BGC0000100.1	monAIII	M3	EDH	M	Streptomyces cinnamonensis	Actinomycetes	WAVLGAHDAGLAPAAHYPDLAALKAAVEAGEPVPDIVFAPFPAQGTETDVPAQVRAHARHALELLRDWLTTEAFAAARLVVLTTGAVTARPEDGPADLATAPVWGLVRAAQAEQPDHVVLVDIDKDIDKDTDEETDQATDAGTASRHALPAALAAAAAQAETQLALRAGTVLVPRL
BGC0000100.1	monAIII	M4	ER	MM	Streptomyces cinnamonensis	Actinomycetes	WVILSDNSSAALADAVSSATAAGGGAPWALLAPVGGGSADDGLPVVRRTLSLVQEFLAAPELTESRLVIVTRGAVATDADGDVAASAAAVWGLIRSAQSENPGRFVLLDVEEEHLHPDGGELPYAALRHAVEELDEPQLALRSGKFLVPRM
BGC0000100.1	monAIV	M5	ZDH	MA3	Streptomyces cinnamonensis	Actinomycetes	WVTLGEDAASLADLLASVEAGAPAPQLVAAPVEPDRTDDGLALATHVLDLVQTWLASPLHDSRLVLVTRGAVTDADVDVAAAAVWGLVRSAQSEHPGRFTLIDLGPDDTLAAAMQAAHLEEPQLAVHGGEIRVPRL
BGC0000100.1	monAIV	M6	ER	M	Streptomyces cinnamonensis	Actinomycetes	WVVLSDGVGRLADVVSAAGGEAPWAVVAPVDASVGDGREGLDGRLVVERVLSLVQEFLALPELAESRLLVVTRGAVATGVDGDGDVDASAAAVWGLVRSAQSENPGRFILLDVDGDGDDQGPDLNGRHLPHATLRHAAEELDEPQLALREGTLYVPRL
BGC0000100.1	monAV	M7	ZDH	MM	Streptomyces cinnamonensis	Actinomycetes	WAVLGQDVPDWAGADMPRHPDMASLSAALDEGTQAPAAVFVETTATSHATPNTAADVTLDASGRAVAERTLHLLRDWLAEPRLAETRLVLITHHAVTTPADDDVNAAPLDVPAAALWGLIRSAQAEHPDRFVLLDTDAKANTDPGPDTSTDHSTASGTYRTVIARALATGEPQLAVRAGELLAPRL
BGC0000100.1	monAV	M8	ER	M	Streptomyces cinnamonensis	Actinomycetes	WVVLSDGVGSLADVVSAAGGEAPWAVVAPVGASAGGGLAGFDRREGLDGRLVVERVLSLVQEFLAAPELAESRLLVLTRGAVATGGDGDGDVDASAAAVWGLVRSAQSENPGRFILLDVDMDVDVDVDMDVDVDVDVDVDVDGDGNGSDLDPDLNGRRLPHATLRHAAEELDEPQLALRDGQLLVPRL
BGC0000100.1	monAVI	M9	CKR	M	Streptomyces cinnamonensis	Actinomycetes	WLIVAPTHGSGTWPQACARALEEAGAPVRIVEAGPHADRADMADLVQAWRASCADDTTQLGGVLSLLALAEAPATSSDTTSHTSTSCGTGSLASHGLTGTLTLLHGLLDAGVEAPLWCATRGAVSCGDADPLVSPSQAPVWGLGRVAALEHPELWGGLVDLPADPESLDASALYAVLRGDGGEDQVALRRGAVLGRRL
BGC0000102.1	mycAI	M1	B1KR	MM	Micromonospora griseorubida	Actinomycetes	WLVVHGHATGGVDQLSGVVADILTRHGATTEHLTIDPAEPGVLAERLGALAAAGEPVRGVVSLLDLDGTLLLVQAMGRAGLDARIRAVTTGAVAVSSDEVPSSEGAALWAFGRVAALELPDRWAGLIDLPVQADARALERLAGALTSEEENQLAVRASGLYTRRI
BGC0000102.1	mycAI	M2	EDH	M	Micromonospora griseorubida	Actinomycetes	LTFLGPTGAERYVGEAVTVHQDLTALRAVGQRGAPPPRAVLAAFGSPHRTAEAVRAVAAAALDLVQRWLADDRHQDSRLVLVTERAVAADDHEDVPDLAGAAVWGLVRSAQSEHPGRFALIDHDGTEQSRALLPAAVALGCAQLALRQGTVRVPAL
BGC0000102.1	mycAII	M3	EDH	M	Micromonospora griseorubida	Actinomycetes	WSVVGGAPALRDAAPGGAYPDLFADGDDAPCVVVEIVGEGSLPQAAHQVGHRALTLVQRWLVEETGDRRLVVLTHGAVDTGHGLTDPAAAVAWGLVRAAQTEHPGRFVLVDLDDDDRSRRALSRILADDIGQVAIRSGVAHVPRL
BGC0000102.1	mycAIII	M4	DHT-C2KR	MM	Micromonospora griseorubida	Actinomycetes	WVLLLPDRLPATDRDIADRVARTMANAGADVDEIVVDATTVSGESLEASLVGAAGVLSALALVEEEHPEFPILPVGLAATLTLLRSLAVAGAPLWTLTRNAVAALPGEVPHLAGAQVWALGRVAALELPSPWGGLIDLPTEPNQQVLKRLVGVLAQNAEDQVAVRNPAAYGRRL
BGC0000102.1	mycAIII	M5	ER	MM	Micromonospora griseorubida	Actinomycetes	CAVVGDDPYGLAAVLGDQGVTCDVHPDVAAFTIRSVTMPDVVVATLPASTDPDVPAVRDVANRALDLAQWWLSVATDAEAARLVVVTSGAVATQRGEPLRDPAAAAAWGLLRSAQAEDPGRLVLLDVAGQRPDGAALLAALASGKPQLALRDGNLRVPRL
BGC0000102.1	mycAIV	M6	A1KR	MM	Micromonospora griseorubida	Actinomycetes	WLVVHGHVTGGVDHLSGVVADILTRHGATTEHLTIDDLDQPDLAALADGLDGAAGLVSLLDAAGLLVLTQAAASTPGTRLWAVTSGAVAVSPTESPSVTGAQVWGLGRCLALELPKLWDGLVDLPAAELDDRTGGRLASVLAGKSGEDQVALRSAGAFARRL
BGC0000102.1	mycAV	M7	EDH	M	Micromonospora griseorubida	Actinomycetes	WMVLGAGAGTGTDLQPTGPVGTGLAGAGVPVRPLPDLAEATGTPPLVLLDCVGEPGAATPQRVRATLARALAVVRRWLVEPRWSGSRLMVVTAGAVAAGCDEDVSDLAGAAVWGLLRSAQAEHPGRFTLVDVDRTPQSWALLPTLVGHPETQFALRAGQLRVPRL
BGC0000103.1	mlsA1	M1	0DH-BKR	M	Mycobacterium ulcerans Agy99	Actinomycetes	YQVIAEPTQQLPRYLHDLHTSTDLHTSTTEADVVVWPVPVPSNEELQAHQASDTAVSSRIHTLTRQTLTVVQDWLTHPDTTGTRLVIVTRHGVSTSAHDPVPDLAHAAVWGLIRSAQNEHPGRFTLLDTDDNTNSDTLTTALTLPTRENQLAIRRDTIHIPRL
BGC0000103.1	mlsB	M1	AKR	M	Mycobacterium ulcerans Agy99	Actinomycetes	WLLIVPSELAKTDPVIGCAAALEAHGALVTIITIFEPDFNRSLMGASLKDIGSHISGVISFLGIHGSEFSDSGAVKTLNLVQAMGDVHLDVPLWCLTQGAVSISADDLIRCSSAALVWGLGRVVALEHPGSWGGLVDLPESPDDAAWERLCALLAQPTDEDQFAIRPSGVFLRRL
BGC0000103.1	mlsA1	M2	0ER-0DH-B2KR	MM	Mycobacterium ulcerans Agy99	Actinomycetes	YQVIAEPTQQLPRYLHDLHTSTDLHTSTTEADVVVWPVPVPSNEELQAHQASDTAVSSRIHTLTRQTLTVVQDWLTHPDTTGTRLVIVTRHGVSTSAHDPVPDLAHAAVWGLIRSAQNEHPGRFTLLDTDDNTNSDTLTTALTLPTRENQLAIRRDTIHIPRL
BGC0000103.1	mlsB	M2	A1KR	MA22	Mycobacterium ulcerans Agy99	Actinomycetes	WLLIVPSELAKTDPVIGCAAALEAHGALVTIITIFEPDFNRSLMGASLKDIGSHISGVISFLGIHGSEFSDSGAVKTLNLVQAMGDVHLDVPLWCLTQGAVSISADDLIRCSSAALVWGLGRVVALEHPGSWGGLVDLPESPDDAAWERLCALLAQPTDEDQFAIRPSGVFLRRL
BGC0000103.1	mlsA1	M3	EDH	MM	Mycobacterium ulcerans Agy99	Actinomycetes	YRVIAEPTQQLPRYLHDLHTSTDLHTSTTEADVVVWPVPVPSNEELQAHQASDTAVSSRIHTLTRQTLTVVQDWLTHPDTTGTRLVIVTRHGVSTSAHDPVPDLAHAAVWGLIRSAQNEHPGRFTLLDTDDNTNSDTLTTALTLPTRENQLAIRRDTIHIPRL
BGC0000103.1	mlsB	M3	EDH	MM	Mycobacterium ulcerans Agy99	Actinomycetes	YQVIAEPTQQLPRYLHDLHTSTDLHTSTTEADVVVWPVPVPSNEELQAHQASDTAVSSRIHTLTRQTLTVVQDWLTHPDTTGTRLVIVTRHGVSTSAHDPVPDLAHAAVWGLIRSAQNEHPGRFTLLDTDDNTNSDTLTTALTLPTRENQLAIRRDTIHIPRL
BGC0000103.1	mlsA1	M4	ER	MM	Mycobacterium ulcerans Agy99	Actinomycetes	YQVIAEPTQQLPRYLHDLHTSTDLHTSTTEADVVVWPVPVPSNEELQAHQASDTAVSSRIHTLTRQTLTVVQDWLTHPDTTGTRLVIVTRHGVSTSAHDPVPDLAHAAVWGLIRSAQNEHPGRFTLLDTDDNTNSDTLTTALTLPTRENQLAIRRDTIHIPRL
BGC0000103.1	mlsB	M4	EDH	M	Mycobacterium ulcerans Agy99	Actinomycetes	YQVIAEPTQQLPRYLHDLHTSTDLHTSTTEADVVVWPVPVPSNEELQAHQASDTAVSSRIHTLTRQTLTVVQDWLTHPDTTGTRLVIVTRHGVSTSAHDPVPDLAHAAVWGLIRSAQNEHPGRFTLLDTDDNTNSDTLTTALTLPTRENQLAIRRDTIHIPRL
BGC0000103.1	mlsA1	M5	AKR	M	Mycobacterium ulcerans Agy99	Actinomycetes	WLLIVPSELAKTDPVIGCAAALEAHGALVTIITIFEPDFNRSLMGASLKDIGSHISGVISFLGIHGSEFSDSGAVKTLNLVQAMGDVHLDVPLWCLTQGAVSISADDLIRCSSAALVWGLGRVVALEHPGSWGGLVDLPESPDDAAWERLCALLAQPTDEDQFAIRPSGVFLRRL
BGC0000103.1	mlsA1	M6	EDH	MM	Mycobacterium ulcerans Agy99	Actinomycetes	YQVIAEPTQQLPRYLHDLHTSTTEADVVVWPVPVPSNEELQAHQASDTAVSSRIHTLTRQTLTVVQDWLTHPDTTGTRLVIVTRHGVSTSAHDPVPDLAHAAVWGLIRSAQNEHPGRFTLLDTDDNTNSDTLTTALTLPTRENQLAIRRDTIHIPRL
BGC0000103.1	mlsA1	M7	ER	MM	Mycobacterium ulcerans Agy99	Actinomycetes	YQVIAEPTQQLPRYLHDLHTSTDLHTSTTEADVVVWPVPVPSNEELQAHQASDTAVSSRIHTLTRQTLTVVQDWLTHPDTTGTRLVIVTRHGVSTSAHDPVPDLAHAAVWGLIRSAQNEHPGRFTLLDTDDNTNSDTLTTALTLPTRENQLAIRRDTIHIPRL
BGC0000103.1	mlsB	M7	EDH	M	Mycobacterium ulcerans Agy99	Actinomycetes	YQVIAEPTQQLPRYLHDLHTSTDLHTSTTEADVVVWPVPVPSNEELQAHQASDTAVSSRIHTLTRQTLTVVQDWLTHPDTTGTRLVIVTRHGVSTSAHDPVPDLAHAAVWGLIRSAQNEHPGRFTLLDTDDNTNSDTLTTALTLPTRENQLAIRRDTIHIPRL
BGC0000103.1	mlsA1	M8	0DH-BKR	M	Mycobacterium ulcerans Agy99	Actinomycetes	YQVIAEPTQQLPRYLHDLHTSTDLHTSTTEADVVVWPVPVPSNEELQAHQASDTAVSSRIHTLTRQTLTVVQDWLTHPDTTGTRLVIVTRHGVSTSAHDPVPDLAHAAVWGLIRSAQNEHPGRFTLLDTDDNTNSDTLTTALTLPTRENQLAIRRDTIHIPRL
BGC0000103.1	mlsA2	M9	ER	M	Mycobacterium ulcerans Agy99	Actinomycetes	YQVIAEPTQQLPRYLHDLHTSTDLHTSTTEADVVVWPVPVPSNEELQAHQASDTAVSSRIHTLTRQTLTVVQDWLTHPDTTGTRLVIVTRHGVSTSAHDPVPDLAHAAVWGLIRSAQNEHPGRFTLLDTDDNTNSDTLTTALTLPTRENQLAIRRDTIHIPRL
BGC0000105.1	nanA1	M1	0DH-C2KR	MM	Streptomyces nanchangensis	Actinomycetes	VAVLGEAPTEPGVDGCRDTYTDLPALLAALDAGAPLPSVVMWRPPAADPGAAPEDAALSAVRGVAAALRAWVAEPRLTVSRLAVVTRGAVAAGGAEGEPVDLAAAAAWGCARGVQAEHPDRIVLVDVDDDVDMGADTDTDIGAAAGLAAALGEPQVALRGDTLLAPRL
BGC0000105.1	nanA7	M10	A1KR	MM	Streptomyces nanchangensis	Actinomycetes	WLLLVPTGYEDHPAVRTVTGALTGHGAEVRPCPADPSVTSRAELAERLTGLRGDDAPAGVVSLLALDERPRADHPAVPAGLAATVAALQALGDAGITAPLWCVTQGAVSTGHDDPLSHPLQAQTWGLGRVAALEHPDRWGGLVDLPAEPDERTEAQLAALLAGAPTGGQAEDQVAIRAGGGALARRL
BGC0000105.1	nanA8	M11	A1KR	MM	Streptomyces nanchangensis	Actinomycetes	WLLVVPEKLEGDAAVETVVRALEGRGARCTTLALAPGDQARDPLTTRLRQLEGGPEVAGVISALGLDEAVHPDHPHLSVGLAGTIALVQALDEMDFGGRLWCVTRGGVSVGEDGPVSPAQAQVWGLGRVMALEYPKRWGGLVDLPAAAEEETASRLAAVVAEGTEDQVALRADGALGRRL
BGC0000105.1	nanA8	M12	EDH	MM	Streptomyces nanchangensis	Actinomycetes	WEVVGADGLGITNALERAGHAVRTTTDLAESARYVDDDAPVSDLMVLDCAPLAGGATALDPGLAAAVHDETARLLGVVQRWLADGRFADSRLVLVTRGAQSTSGDEGVTDLVHSALWGLVRSAQLENIDRFVLVDLDGADPDAAALLPGALSVALGAGEPQVAVRQGRVVVPRL
BGC0000105.1	nanA11	M14	ER	MM	Streptomyces nanchangensis	Actinomycetes	WTAVATGSEPTYYGVRRYGDLDALAAAVDGGLPAPPVTLLPCEPAPDDGDLPGALRRRLGEVLHTVQRWLADERFAASRLVVVTRGAVAAFEGDDVTDLVHAPVWGLIRSAQSEHPDRLALVDLDGPELPKAVAAAVAVAVAAGEKQIVVRDGTVRVSRL
BGC0000105.1	nanA2	M2	ER	MM	Streptomyces nanchangensis	Actinomycetes	PATLAVLGDDAPDLADADRYPDLDALFRAVADGAPAPDVVIASVRTGNDPAGSDTGLATARRTLTLAQEWLAGSGADGARLAVVTRSAIRTGDDGQERVVPSAAAVWGLMRSAQTEHPGRFVLIDEDTDSTENILEAVRTDEPQLALRGGRALVPRM
BGC0000105.1	nanA3	M3	EDH	M	Streptomyces nanchangensis	Actinomycetes	LAADDTNATDTATASLPAEHVARHPDLAALSASVAAGAPAPDLVVMACLGAPYDTSDDGDEPPSQVRTATHRVLARLREWLTDDALAASRLVVLTAKAVAADPADAPPDLAGAAVLGLLRAAQAEHPGRIVLVDTDGISASRDALAAAVAAAVAAGEWQLALRDGRALVPRL
BGC0000105.1	nanA3	M4	ER	MM	Streptomyces nanchangensis	Actinomycetes	WALLDGGPLPFDPSKAGSLPRHADIDALLTAPALPSTVLVGVSGPVGAAGDENSAEGALAVTTGVLTSARRWLETPELADARLVLVTRGAVAAAETDDGPDPAAAAVWGLLRSAQAENPGRFLLCDIDDGAGPDDVLGAVTRAVALDEPQVAVRGERVLTPRL
BGC0000105.1	nanA4	M5	0DH-C2KR	MM	Streptomyces nanchangensis	Actinomycetes	WATLGASGPGHHYADLAALLSAADGAEPAPPVVLASVTPTADTGADSEADTDLATVRRTLGLIQEWLAEPGLRDSRLVLITSGATSVGDGDGPVEPGSAAVFGLVQAVQAEHPDRFMLVDVGADADADGDGDGGETLADAVRRAIAADEPQIAVRSGEVSVPRL
BGC0000105.1	nanA4	M6	0ER-0DH-BKR	M	Streptomyces nanchangensis	Actinomycetes	TLADRSDAAAPTPGVVLAKAPVAEGEGGELEAVQRALTLVQDWLAEPRPDDARLVVMTRDAVAVDGEAHIDPVAAAVWGLIRSAQTENPGRFVLLDRDLDTELDTDPVLGPDALAEADGRVAEAVRCALDLDESQVALRGGRVLVPRL
BGC0000105.1	nanA5	M7	EDH	MM	Streptomyces nanchangensis	Actinomycetes	WATVGGGGVRLAGVADHADLGALLAAVDDGAPVPTVVLHPVPATATPDDGLAAVGGVLALIREWLAEPRWLDSRLVLVTSDAVSAGDDEGAVDPGGAAVWGLVRSVQAEHPGRFTLLDVGGDTDADAGGGESLAEAVRRSIDADEPQVVVRAAGTLVPRL
BGC0000105.1	nanA5	M8	ER	M	Streptomyces nanchangensis	Actinomycetes	WAMLGDAGLRDGGLADAVAPLASYPDVAALVAAMDDGTPVPSVVLTGLAPADGGDADVVVEVLTTAREWLAEPRLAESRLVVVTHDAAVAEDTDSGPDGGDVDPVAAGVWGLIRSAQSENPGRFTLLDLTRRDAGTAPDVVEVLRAAMDADEWQVAVRGGRALVPRL
BGC0000105.1	nanA6	M9	CKR	M	Streptomyces nanchangensis	Actinomycetes	WLLVVPPKGADAWADACERALTADGGEVRRLVTDGRADVAELAASLRALYAEGPSPAGVLSLLPLDERPHEAFPAVTGGVTGTHVLLRALLDAELDAPLWCATRGAVAVDDDEAPEAPAQAQVWGLGRVAALEHPTAWGGLVDLPASVADLAPDLLCAVLAGRNGEDQVALRPAGAFGRRL
BGC0000106.1	natD	M10	0DH-A1KR	MM	Streptomyces sp. CS	Actinomycetes	WAVARSAADVTALAEGSATAAELPAFIVLEAVVAHDQGAEDPALALTNRVLAAVQTWLAAPALEPTRLVVATRGAVPAGADGAVTDPAGGAVWGLIRAAQSENPDRMLLLDLDPALDPDPSLPPGSAAASDLAADGFLDRVLGRVAASGGEPELALRGETLSIPRL
BGC0000106.1	natD	M11	EDH	M	Streptomyces sp. CS	Actinomycetes	WARVATAADLAVPAVGDSVPEVLVVPADGTDDVLERTSRVLDVLQSWLADEWFADSRLVVATRGAVPATGEDSLTDPAGAAVWGLVRAAQAENPDRIVLVDADTPLDDDEALAALLGTAWAADEPQLALRGTTVRAPRL
BGC0000106.1	natE	M12	ZDH	M	Streptomyces sp. CS	Actinomycetes	RVVQARSGGGETPVALVGRVLADVRAWLADEEAVGAGRLVVVTGGAVAAGGDEALTDPGGAAVWGLVRAAQAENPDRIVLVDADSDGDGDSDGDWGEVDLKSVLATGEPQVAVRGGALYVPRL
BGC0000106.1	natE	M13	EDH	MM	Streptomyces sp. CS	Actinomycetes	WLRLSTAEEVATLAEDTADGTGLPDAVVLDAVTTGPDDTPLAVTDRTLEVVQTWLDGGGLEDTRLVVLTRGAVPAGGDATLTDPGGAAVWGLVRAAQAENPDQIVLLDVDAEADTDDPDARPGTGSEPTELGSLLGAVLASGEAQVAARGEGLYVPRL
BGC0000106.1	natB	M5	0DH-B1KR	MM	Streptomyces sp. CS	Actinomycetes	WVPLFHPDEVGILADAVTDPLVAVVEAVTPENSTDGTADAALSQTNRVLAMLQAWFAAPSLERSRLVVLTRGAVPAGGDSAVTDAAGAAVWGLVRAAQAENPDRVVLIDTDTDLDIAYGTAVEPLLTTVLASGEAQVAVRGSVLSVPRL
BGC0000106.1	natB	M6	EDH	M	Streptomyces sp. CS	Actinomycetes	WPRVTTAADVTALKDEVPQAAVLELEGADDGDEEALARTAAALEVVQAWLAAEVFEDARLLVVTRGAVPAGGDSAVTDAAGAAVWGLVRAAQAENPDRIVLLDLDPADDTSADDLRATVLAPALASGEAQVAVRGSVLSVPRL
BGC0000106.1	natC	M7	0DH-BKR	M	Streptomyces sp. CS	Actinomycetes	WIALSDPSGVAALAEGAELPTAAVFDCVADGVDDTAALTLTTRALGVVQAWLAEPRLEATSLVVRTRGAVPAGGERAVLDPAAAAVWGLVRVAQAESPGRIVLLDTDATAGTDATAGADVEPLLAAVLATGEPQVAVRGTTLSAPRL
BGC0000106.1	natC	M8	EDH	MM	Streptomyces sp. CS	Actinomycetes	WLPITESAHVAALVDGSGVPPVVVLEAARTETADDAAALALTGRVLEIIQAWLARPGLEAAQLVVRTRGAVPAGGERAVLDPAAAAVWGLVRVAQAESPGRIVLLDTDATAGADVEPLLTPVLATGEPQVAVRGTTLYAPRL
BGC0000106.1	natC	M9	0DH-CKR	M	Streptomyces sp. CS	Actinomycetes	VPGARVVQARSGGGETPVALVGRVLADVRAWLADEEAVGAGRLVVVTGGAVAAGGDEALTDPGGAAVWGLVRAAQAENPDRIVLVDADSDADGDSDGDTGEVDLKSVLATGEPQVAVRGGALYVPRL
BGC0000109.1	nemA1	M1	EDH	MM	Streptomyces cyaneogriseus subsp. noncyanogenus	Actinomycetes	ASPGGADIAALGTSELPCRTYETIAELSQALADGAPAPDAVVSDVGAVGGPLDTVSLHGLCRRGLELVQAWLGEPRTADTRLVLVTRGAVGCAPAEPVADPAAAALWGLVRSAQAEHPGRLLLLDLDPAGSRPVSGRLVEQAVACGEPHIAVRGDGLRVPRL
BGC0000109.1	nemA3	M10	EDH	MM	Streptomyces cyaneogriseus subsp. noncyanogenus	Actinomycetes	VLTHDRAAADLSGLLSGLDTDDAPVPDAVLLTCSQGAVADVLGEVLSVVQDWLADDRLAEARLVVVTHGAVATRTGEEVTDVAGAAVWGLLRSAQSEHPGRFVLLDADLSDDTTVTAALACDEPQLAVRGGRLLAARL
BGC0000109.1	nemA4	M11	CKR	M	Streptomyces cyaneogriseus subsp. noncyanogenus	Actinomycetes	WVVVVPEGVVGAAAVVEGLERAGVCVRVVAVEGGCADRVVLGERLREVCGGEGPVGVLAVCGGGVGVAGLVLGLVQAVEGLGVPLWCVTRGAVSVGEGDRLGDPGGAVVWGLGRVAGLELPDRWGGVVDLPEVVDERVVEGLLGVLSGGGGEGEVAVRASGVFVRRL
BGC0000109.1	nemA1	M2	B1KR	MM	Streptomyces cyaneogriseus subsp. noncyanogenus	Actinomycetes	WLIAIPETHRNHPHTTNLLTNLPHHNITPIPLTINHTTDLHHAYHHAHHHTTPPITAVLSLLALDETPHPHHPHTPTGTLLNLTLTQTHTQTHPPTPLWYLTTQATTTHPNDPLTHPTQAQTIGLARTTHLEHPHHTGGHIDLPTTPHPNTLTQLITALTHPHHQHNLTIRTHTTHTRRL
BGC0000109.1	nemA1	M3	0ER-0DH-BKR	M	Streptomyces cyaneogriseus subsp. noncyanogenus	Actinomycetes	VAGGGGELVAWECPGGGVAEVTAAALGVVQEWLADEREGDARLVVVTRGAVAVDAGEPVRDVAGAAVWGLVRSAQSEHPDRFALLDLDPDTKTDPGIDTDGDTDVSADAKVGTGDGLDDAAVASALARGESQLAVRDGVVRVARL
BGC0000109.1	nemA2	M5	BKR	M	Streptomyces cyaneogriseus subsp. noncyanogenus	Actinomycetes	WLIAIPETHRNHPHTTNLLTNLPHHNITPIPLTINHTTDLHHAYHHAHHHTTPPITAVLSLLALDETPHPHHPHTPTGTLLNLTLTQTHTQTHPPTPLWYLTTQATTTHPNDPLTHPTQAQTIGLARTTHLEHPHHTGGHIDLPTTPHPNTLTQLITALTHPHHQHNLTIRTHTTHTRRL
BGC0000109.1	nemA2	M6	AKR	M	Streptomyces cyaneogriseus subsp. noncyanogenus	Actinomycetes	WLIAIPETHRNHPHTTNLLTNLPHHNITPIPLTINHTTDLHHAYHHAHHHTTPPITAVLSLLALDETPHPHHPHTPTGTLLNLTLTQTHTQTHPPTPLWYLTTQATTTHPNDPLTHPTQAQTIGLARTTHLEHPHHTGGHIDLPTTPHPNTLTQLITALTHPHHQHNLTIRTHTTHTRRL
BGC0000109.1	nemA2	M7	EDH	MM	Streptomyces cyaneogriseus subsp. noncyanogenus	Actinomycetes	WAAIGTGPAVAGLAGHADLTVYAEAGDLLRDLDGGAPAPAVVVLSVTPDADEFATPRAATGRALSVLQAWLADERLADSRLVAVTSGAVVAAPGDDTVDVPGAAVWGLVRSGQSEHPDRITLLDCASGARPGPDLVAAALASGEPQLAARAGVLYTPRL
BGC0000109.1	nemA3	M8	ER	MM	Streptomyces cyaneogriseus subsp. noncyanogenus	Actinomycetes	LAGGGGELVVWECPGGGVAEVTAAALGVVREWLADEREGDARLVVVTRGAVAVDAGEPVRDVAGAAVWGLVRSAQSEHPDRFVLLDLDPGTGVETVVDADEDMGAGVGAGVDVAGFVACGEAQVAVRGGVVRVPRL
BGC0000109.1	nemA3	M9	EDH	M	Streptomyces cyaneogriseus subsp. noncyanogenus	Actinomycetes	ASVAGGGGELVAWECPGGGVAEVTAAALGVVREWLADEREGDARLVVVTRGAVAVDAGEPVRDVAGAAVWGLVRSAQSEHPDRFVLLDLDPDTKTDPDTDTDTDTDGDTDVSADAKVGTGAGLDDAAVASALARGESQLAVRDGVVRVPRL
BGC0000110.1	norA	M2	EDH	MM	Streptomyces orinoci	Actinomycetes	WAVLDGAESLAPAIEAAGCEVLRRPDLTAAIAAPGLPDAMPAARDLGLGERSDAAPGLPDAMLAARDAAPGELSAAVPEPPDVVLAALDPGRGELPAAAREVTGRALALAQRWLAEDGPSRLVLLTRGAVAATGTETADPALAAAWGLLRSAQSEHPDRLVLVDWDGQPSSAAALPAAVSGDEPQLALRGGRILAPRL
BGC0000110.1	norA	M3	EDH	MM	Streptomyces orinoci	Actinomycetes	WAVLGEDDPGLALPYFPGLPALWAAYDGGATAPELVLAPLAGGPGDGPERSRELTCRALELLQSWLADDRTETRRLVIVTRGAVTASDDDPPPDPAAAAVWGLVRSAQSEHPGRFLLADLDRHPDSAPALTAALATALALDEPQLALRAGRVLLPRI
BGC0000110.1	norB	M4	ER	M	Streptomyces orinoci	Actinomycetes	CVVLGDDDLAAAVAAPGLPGPEALLAALDSGESIPGLVLLPCRAPDADTPDADDPLAAARSLTGRVLEVIHHWLTDARLTDSRLAVITRGALSAADGEPVTDPAAAALWGLVRSAQSEHPGRFLLADLDGHPGSTAALPAALSGNEPQLALREGRLLVPRL
BGC0000114.1	NigAVII	M10	AKR	M	Streptomyces violaceusniger	Actinomycetes	WLVVVPAGQEEHATVQVTVQALRAHGATALRHGVNAHDIDRAALHERLARLTEEFQPAGVISLLALDTEPLIGHSAVPAGLGATTALLQALDDAGIGTPLWCLTQGAVATGRGDLLPHPGQSQIWGFGRVAALEYPQRWGGLIDLPTTMTHHTAGRLAALLVPGQPEDQVAIRTTGTYARRL
BGC0000114.1	NigAVII	M11	AKR	M	Streptomyces violaceusniger	Actinomycetes	WLLIIPAGQSDHPAVETVAHALTTHGATPIRHMLDTHTVDRDALADHLTRLAMQGEPAGVLSLLALDEEPHPEYAAVPSGLAATTVLLQALGDAEIPAPLWCLTQGAVATGPGDPLPSPRQAQTWGLGRAAALEHPRRWGGLIDLPAVIDHHTADRLAALLTPGRPEDQTAIRATGSYARRL
BGC0000114.1	NigAVII	M12	AKR	M	Streptomyces violaceusniger	Actinomycetes	WLLLVPTGLEEHAAVHATVEALDAHGAAHEVLSIDGADARRDAIAPLLSQLPDGSTPEGILSLLALDRTPHPDHPAVPTGLAATAALVQALGEAPLIAPLWCVTQGAVATNAADPLPHPHQAQIWGMGRVAALEHPRLWGGLIDLPAVADARTPARIAAMLVPGQPEDQVAIRSTVLARRL
BGC0000114.1	NIGAVIII	M13	ER	MM	Streptomyces violaceusniger	Actinomycetes	SAVIGPDGVPPADALRDAARLPDLAAVRATVTDGAPPPDVVFASFGSSADGRGDPGDPGDPVARTHDLGKEALGVLREFLATPEFADARLAVVTRGAVATQSHDDVHDLPASAVWGLVRSAQSENPGRVLLLDLDERDTSLRSLPDAVASGEPQLALRDGVAYVPRL
BGC0000114.1	NigAII	M2	ER	MM	Streptomyces violaceusniger	Actinomycetes	WAILGPEDRAPAGSAAVCHPDPQALISALDAGAPTPTIVLALEPAKAVDAGIAGMGADGLASAERVLALLQSWLSEPRLADTRLAVVTRGAIATDDPGGFDPVAEGVDTASAAVWGLVRSAQAENPGRFLLLDLDPHAEVSSARLVADAVARAVEMDESQLALRAGRALMPRL
BGC0000114.1	NigAIII	M3	EDH	M	Streptomyces violaceusniger	Actinomycetes	WALIGPRDQAPAAPDLPAHPDLDALRAALDGGQPAPDVAVLECPGAPDTSAPDTSAHPDETPARVRAVVHHILGALRTWLTDERFSGTRLVIATRGAVATGPGDGPADLATAPVWGLVRAAQAEHPERILLLDLDDDPASRDALRTALPAAVAGAESEVAVRAGTALVPRL
BGC0000114.1	NigAIII	M4	ER	MM	Streptomyces violaceusniger	Actinomycetes	WVALGAEGVEWAPPGVVRHPHLESLVAAIDAGTPVPSVALTAVPASKTAMDIEAAETDALAAVRRTLDLLRGWLAEPRLAESRLVVVTHGAVAPGGPVAEDHGSGAVDTAGAAVWGLLRSAQAENPERFLLLDRDPHGAPDPDEIGAAVLDGVLKAVALDEPQVAVGSGRVWAPRL
BGC0000114.1	NigAIV	M5	EDH	MM	Streptomyces violaceusniger	Actinomycetes	WTVLAAEGSYPDLDAFLAGLDDGEGGPAVVLAEFPRPDTDAVADMAAAGLAMAQRALELVQKWLAEPRLADARLVVVTRGAVAVTDTEGAMDVAAAALWGLLRSAQAENPGRFLLLDLDLDFGSDVDLDVDRALDLHLRDAITQAVDLDEPQLAVRDGQAWVPRL
BGC0000114.1	NigAIV	M6	ER	M	Streptomyces violaceusniger	Actinomycetes	WAVLDGQGCGPIPPGAVHHPRLEELVSALDDDGPAPSVAIAYLPAFGDPSDGSDPSDSCAGDTDTDLAAAGLAASEWVLELVRGWLAEPRLADTRLVVVTRGAVAIDASEAEGAGDGGVDVAGAAVCGLVRSAQAENPGRFTLLDLDPDSEPLAEGVRGAVTWAAHMDEPQIALRAGRLRVPRL
BGC0000114.1	NigAV	M7	EDH	MM	Streptomyces violaceusniger	Actinomycetes	WVVLGEDSLHLAEEPGLGGGGVVCHPDLEALVAALDDGAPPPAFAVTYLPADGDPAEAGAVARAADGLAAVGEALELVRGWLAEPRLADARLVVVTRGAVSIDGPHGEDSGDGEVNVAAAGLWGLLRSAQAEHPDRFVLLDLHQATDSAAGEVADAVVRAVRADEPQVALRTGRPMVPRL
BGC0000114.1	NigAV	M8	ER	MM	Streptomyces violaceusniger	Actinomycetes	WAVLGVGGHPDPAALVAALGDDEPVPPVVLADMTEPTRPIGEGAEEASAEALSATERALELVRGWLAEPRLAEARLVLVTRGAVTVDGPESTTRVDLAAAAVWGLVRSAQSENPGRFVLLDSDVDSDIDSDDDFDADADTDTDTDANLRPNATLRIAVARAMETDEPQLALRAGRALVPRL
BGC0000114.1	NigAVI	M9	C2KR	MM	Streptomyces violaceusniger	Actinomycetes	WLVVHPKSASDGWTDACVRALGADGGQVYLLELDGDTDREGLAALLRSRYAEETPPTGVLSLLALDEGTPPLPGVAPGLTGTLTLLQALVDAAVPAPLWCATRGAVSIDDSDPLDAPHQAQLWGLGRVAALEHPDRWGGLVDLPASPDSLDARRLCALLTGACGEDEAALRPAGAYGRRL
BGC0000115.1	nysB	M1	A2KR	MM	Streptomyces noursei ATCC 11455	Actinomycetes	WLLVTTDGIDDTDVAGALESYGAEVRRLVLDEECTDRAVLRERLAGAEDVTGIVSVLAAAEDDAARHPGLTRGLALTVSLVQALGDAEATAPLWFLTRGAFATGPSDPVTRPLQSQIAGVGWTTALEHPQRWGGTVDLPDTLDARAAQRLAAALSGALGAEDQLAVRAAGVLARRI
BGC0000115.1	nysI	M10	AKR	M	Streptomyces noursei ATCC 11455	Actinomycetes	WLLVASDATAADQPALLDGLADALGSHGARVRRLLLDDSCADRAVLAERLARTADVDAATQVLSVLPLDERDADDCPPLTRGLALTVALVQALADTGAQGRLWTATRGAVSTNPADPVTHPVQAAAWGLGRGVALEHPRLWGGLVDLPQVFDERAGQRLAGILAVKDAPDGEDQVALRATGVSGRRL
BGC0000115.1	nysI	M11	A2KR	MM	Streptomyces noursei ATCC 11455	Actinomycetes	WLLVTADGIDDTDVAGALETYGAEVRRLVLDEECVDRAVLRERLAGAEDVTGIVSVLAAAERTDAVPGTSLVLGTALTVALIQALGDAEIDAPVWALTRGAVSTGRADELTAPVQAQVTGIGWTAALEHPQRWGGTLDLPAALDARAAQRLAAVLSGALGSDDQLAIRPSGVFTRRI
BGC0000115.1	nysI	M12	BKR	M	Streptomyces noursei ATCC 11455	Actinomycetes	WLVLVPHDHQDRQDDATAAWAADVETALGTTTVRLTVTTTDRAALAARITEAAGDQGPFSGVLSLLPLATGDAGHPGAPAALTLTTTAVQALGDAGIDAPLWNVTRGAVAVGRAEQVTAPEQAAVWGLGRAVALELPARFGGTLDLPATLDGQAARRLRAVLAATDGEDAVALRPSGVFLRRL
BGC0000115.1	nysI	M13	CKR	M	Streptomyces noursei ATCC 11455	Actinomycetes	ALVLVPAGNRDTAWMTAVADALGADTVTAEPDALAEQLTAAGDTPWRVVVSLLAAASEGLPADGAWPAALLATLDEAGVHAPLWCVTRGAVAVAGEAPTAVGQAALWGLGRVAALDHPDRFGGLADLPADTDAHAAGLLAAHLAAPGTEAEIAVRATGVHARRL
BGC0000115.1	nysI	M14	BKR	M	Streptomyces noursei ATCC 11455	Actinomycetes	WLAVVPEGFADDPWVTTTLDGLGTHLVHLEVAEADRAALADAIAARTADGTRFGGVISLLALREELTGAVPEGTALTTTLLQALGDAGVDAPLWCVTRSAVSAGRTDRPHRPLQGAVWGLGRVAALEYPQRWGGLVDLPEEPDERSAAGLAAVLAGLDGEDQVAVRGTAVLARRL
BGC0000115.1	nysJ	M15	ER	M	Streptomyces noursei ATCC 11455	Actinomycetes	WAVLGTDPIGLTEALTAAGPDTVTGLRDGVDALGELTAGDDRPVPDVVAVPLRGATDHGPAGAHDLTRTVLALLQEWLAEERFARSRLLLVTRGAVADGERGPLDLAAAPVWGLVRSAQSENPGRLLLVDLDDTAESAAQLPLLPALLDADEPQAVVREGTVRVGRL
BGC0000115.1	nysJ	M16	BKR	M	Streptomyces noursei ATCC 11455	Actinomycetes	VLVLVPAAATTDPWVADVVAALGPDARRVDVPADGTDRAALAALLTEAADDTAPTAVVSLLALDETSGDDAVPAGTTATAALVQALADTGAPAPLWALTRGAVAALPDEQPTAPAQAAVWGLGRIAALELPRHWGGLVDLPADLDERTARRLPAALADAGDEDQLALRATGAYGRRI
BGC0000115.1	nysJ	M17	0DH-BKR	M	Streptomyces noursei ATCC 11455	Actinomycetes	YAVLGDQLAELDGQLRIAGDGPGRVASLAALLDGGAPLPRLVLAPVLGVPTGEGDLPAAVRGTTTAVLELLQRWTADARTADSHLVIVTRGAVAAGAEDVHDLAAAPVWGLVRSAQSEHPGSFLLLDLDPADPAGASRAAAPATLAALLDAGETQAAVRADTLTVARL
BGC0000115.1	nysK	M18	0DH-BKR	M	Streptomyces noursei ATCC 11455	Actinomycetes	WAVVGDDELDLGYALHRADETVSAYAASLGGAIGDSGLAPDVFLVPVVGGPDAGPDAVHAVTARALGLLQEWLNEPRLAGARLVFVTRGAVAVPGETVTDPAGAAVWGLLRSAQTENPGSLLLVDLDDAFRSAGMLPHVLTLDEQQLVVRDHAVRAARL
BGC0000115.1	nysB	M2	A1KR	MM	Streptomyces noursei ATCC 11455	Actinomycetes	LLVAVPPDHADAPWVAAALDALGTDTVRFEAKGTDRAGWAAQIAQLVEDGEEFTGVVSLLAAAEDLHPDFGSVPLGLGQTLVLVQALGDAGLTAPLWCLTRGAVATGRDDALDSPTQGALWGLGRVVALEHPDRWGGLIDLPATLDARAAARLTGLLADPAGEDQLAVRATGVLARRM
BGC0000115.1	nysC	M3	EDH	M	Streptomyces noursei ATCC 11455	Actinomycetes	PALLGPDTAVLADALGDPAVARHATLDDLLAGDTTPPATVLVPLGAPLDGDTAQHAHALTRSALTLVQQWLATDRLADSRLVFVTHGAVATDDAPPTDLAAAAVWGLIRSAQTENPGTFTLLDLDTEPDSTTALSRALTLDEPQLLLRAGRARAARL
BGC0000115.1	nysC	M4	EDH	M	Streptomyces noursei ATCC 11455	Actinomycetes	VAVLGPDPDALADTLRATGIRTTAPRDLAALADAEGPVPDLVVTTLTTTPGAPVPDAAHATTAAVLALAQQWLADDRFADARLVLVTRGATDGTDPAAAAAGGLIRTARTENPGRFALLDLAPDTGRPDPETLATALAASHDEPDLAVRGTDVHAARL
BGC0000115.1	nysC	M5	ER	M	Streptomyces noursei ATCC 11455	Actinomycetes	VALVGADGTAIAADLTAAGIHTTLHPDLTTLATTDADVPKTVLIPLTGTGTGTGTGTESTDGIGTGAAESDASAPSPAEVAHTLSTAALALVQEWTAQERFAGSRLAFVTTGATAAGGTDVMDVAAAAVWGLVRSAQSEAPDTFVLIDRDPGPAGTHDRTAAAERGQLLLRALHTDEPQLALRDGGVLAARL
BGC0000115.1	nysC	M6	EDH	M	Streptomyces noursei ATCC 11455	Actinomycetes	VAVVGTETSELTSELTAALRAAGADVDVRTTLSTDEPAPALIALPLVASDQTGTAEAAPVPAAVHDLTRRALALVQTRLQEQHFADTKFVFVTRGATVGRDVAAAAVWGLVRSAQSENPGCFALVDLDPDGAVGAAALVAALVSGEPQLAVRGDVLRVARL
BGC0000115.1	nysC	M7	EDH	M	Streptomyces noursei ATCC 11455	Actinomycetes	VAIIGTDHLGLAEALSSSSAGATTTTTAAAYESLDALIAAGPEVSVPDVTLIGLTTEDAIAQYVNDHDATVAGQGTIGAGAAAVDAARRLTAEALRTIQAWLADERLAARRLVFVTRGAADGQDVAAAAVQGLVRSAQTENPGTFGLLDLDGTEASTAVLGEALTSDEPQLLLRDGHLHAARL
BGC0000115.1	nysC	M8	EDH	M	Streptomyces noursei ATCC 11455	Actinomycetes	VAIIGTDPFGLADGLSDALPLVEERGDLAALAASEHPVPDLVLVPVAGTRRTGVPADAEGHTDAGTSDMLRSVREATAQVLEQIQQWLADDRFEAARLVFVTRGAVSVGEGGIADLAASAVWGLVRSAQSENPGCFGLLDLDLDLALDSDLAPEVDIERDRDRDPVGGTVQPALAAALHATADEPQLALRGGTVQAARL
BGC0000115.1	nysI	M9	EDH	M	Streptomyces noursei ATCC 11455	Actinomycetes	VALLGADPFGLLTHAGFADAPAYPDLAALAAADGPVPTTVVLSLAGTGDDAADPARSAHRCAAEALAAVQTWLDHHERFAAARLVFVTRGATVGRDVAAAAVWGLVRSAQSENPGCFALVDLDPDGAVGAAALVAALVSGEPQLAVRGDVLRVARL
BGC0000117.1	olmA1	M1	BKR	M	Streptomyces avermitilis	Actinomycetes	WAVVVPASGSYEDIVAGVTAALRDHGARPVVVEVDPAGPERADVADTLRAALGEDAGGVVSLLGTAGSLSSGVAATAVLVQAWTDLGGGARLWCLTRGAVSVSPSDPLAAPAQAQLWGMGRVAALEHPERWGGLVDLPAVPDDRAWTRLCAVLAGGSGEDQVAVRAAGLFARRL
BGC0000117.1	olmA4	M10	ER	MM	Streptomyces avermitilis	Actinomycetes	YALVGADLFGLAGDRAGVRVGADLDELGAADGPVPDIVVHCLAPGAPGDPAAAAHTAAQETLDRVRAWLADERFGSARLVFVSSGAVAAGDDEDVTDLGNAASWGLVTSAVSEHPDRFALVDLDGTAESREVFAAALGCAEPRLAIRGGTVTAPRL
BGC0000117.1	olmA5	M11	0DH-A2KR	MM	Streptomyces avermitilis	Actinomycetes	WAVLGDRPSWAGPDSGAVCHADLDALAASVAAGDPVPGFVVLDPAAGGRDDDGHPAVARERAARVLESARAWVSEDLDERLAPVPLVVVTRDAVGTSADDPVTGLGSAPLWGLVRSVQSENPGRFVLLDTDGDPESGRSVPGAVASGEPEIALRGGSALVPRL
BGC0000117.1	olmA6	M12	C1KR	MM	Streptomyces avermitilis	Actinomycetes	WLVVTPGGAGPVEEVRRALEAVGAEAVVLAWEAEEGREALAGRLTGAGEVSGVVSLLGWDEEAAPVATVTLVQALADAGVEAPLWVLTQGAASVGAEDVVHPVQTQVWALGQVAGLEQPGSWGGLVDVPGVWDERVASGLTAVLAAGEGEDQVAVRSSGAYARRL
BGC0000117.1	olmA6	M13	A1KR	MM	Streptomyces avermitilis	Actinomycetes	WLVVAPGEGAPAERIEEALVGAGAEVVVLAWETEEGREALAGRLAEAGELSGVVSLLGWDEKAAPAATVTLVQGLADAGVEAPLWVLTHGAASVGSGDVIRPVQTQVWALGQIVGLEQPGSWGGLVDVPEVWDERVASGFAGVLAAGEGEDQVAVRSSGAYARRL
BGC0000117.1	olmA6	M14	C1KR	MM	Streptomyces avermitilis	Actinomycetes	WLVVAPSDGAPTERMERTLAGAGAEVVVLAIEAGTDRAELAERLAGTPEAAGVVSLLAWDEHTAVASTLTLIQAHGDIESAAPLWVVTRGAASVDSGDEIRPVQTQVWALGQIVGLEQPGSWGGLVDVPEVWDERVASQVAGVLAAGEGEDQVAVRSSGAYARRL
BGC0000117.1	olmA7	M15	A1KR	MM	Streptomyces avermitilis	Actinomycetes	WLVVTPGGAGPVEEVRRALEAAGAEVVVLAWEAEEGREALAGRLTGAGEVSGVVSLLGWDEEAAPVATVTLVQALADAGVEAPLWVLTQGAASVGAEDVVHPVQTQVWALGQVAGLEQPGSWGGLVDVPGVWDERVASGLTAVLAAGEGEDQVAVRSSGAYARRL
BGC0000117.1	olmA7	M16	EDH	M	Streptomyces avermitilis	Actinomycetes	WAMLGFDPLEIRPRLVEAGLTGTPYLDPQSLIDTVESGKPAPSVVAMSCFGGDQGGIVAATHDAVHRVLEVIQHWLADERLTGSKLLLLTRGAVPAAGTDRTEDVAASAVWGLVRTAQSEHPDRIVLIDLDDDPASYRALPKALGTGEPQLALRAGSPCVPRL
BGC0000117.1	olmA1	M2	A1KR	MM	Streptomyces avermitilis	Actinomycetes	WLLVTADPDGEAARWARTALGASVTAQLTSPDGPIPAGPWTGVVSLLGLADRPHPDHPVVPVGVADTVALLSALREAGIDAPLWGLTRGAVGTGRSDQVRAPGQAQLWGLGRVAGLENPAAWGGLVDLPAELDDRAAGLLRAALAAGEDEQEYALRPAGLYVRRL
BGC0000117.1	olmA1	M3	ER	M	Streptomyces avermitilis	Actinomycetes	CVLLGEPSAGAWRSHPDLAAYAAALADGKETPGPVLARCPLTTGDPAEAARRSAEWTLDLLQQWLADDRLTDSHLVIGTRHAAPVATPYAAPVDATDADAAPVDAGHEAPVDTAAAALAQSTLAGLVRSAQTENPARITLVDFDTTAPDPAHLTAAVRLGEPEVAVRQGTLYARRL
BGC0000117.1	olmA2	M4	C1KR	MM	Streptomyces avermitilis	Actinomycetes	WLVVAPDGDSDGDGHGDGARVAEALGERAVLLTAGPGLAPALARLPEDRPVAGVLALPAESATRWTRLAPRSALRGRGARPASVRHQAPVSVDTEAVPGAAPALLWGLGRVPHSGGGVVDLPAGLDARSLRLLAAVLAAPGDQDELAVRPGGVFARKL
BGC0000117.1	olmA2	M5	A2KR	MM	Streptomyces avermitilis	Actinomycetes	WLLVVPTGTGTTDEPLTGTGTTDEPVTGATTGGTADDPVTAAVTALLRERAEQLVVLAVDPGSDPTTLATALRGALGGTEPAGVVSLTGIDGSPHPERPVVPAGAALSLALLRALADARVTAPLWCLTHGAVTTDDDAGPVHPEQAAVWALGRVAALEFPGTWGGLVDLPDPLDDRTADRLAAVLAGLDGEDQVALRPSGVFGRRL
BGC0000117.1	olmA2	M6	0DH-BKR	M	Streptomyces avermitilis	Actinomycetes	WAVVGADGLAKALVATQGAEVEAHPDLASLGRSTEHGAAPGLVVLSVDTEPGATVESMRHTTHRTLELVKELLADGRLAGARFVLVTRAAVSTGDGTPVDPAQAAARGLLLSAQAEHPERFVLADLGGRDADAELLAAAVGTALTEAEPQLAVRDGQVLVPRL
BGC0000117.1	olmA3	M7	ER	MA3	Streptomyces avermitilis	Actinomycetes	CVVLGADPLGLCDALPGTPLAAGTEELAALVAADGAAVTALLPVAGDGSTDRVGEPVVDTVALLQEWIADGRLDDTRLVVVTRGAVAATAGEDVTDLAAAGVWGLLRSAQNEHPGRFGLLDLDTAAGSRAALGAALASGEEQLALREGQVRTPSL
BGC0000117.1	olmA3	M8	EDH	M	Streptomyces avermitilis	Actinomycetes	WAVVGPAVTDAPDIDPYPDLDALRRHLAEGGPAPDHVLFPCAPGTPTGFDADAARTAVHAALDTLRTWVEDEHFVKSRLVLCTRGAVEARPGEGVRDLAQSAVWGLARSAQLEHPDRLLLVDLDTDTGLADLTRAQALVQASGYGTDDSDDFDGTGDSGDTADAAQFAIRAGTTLVPRL
BGC0000117.1	olmA4	M9	EDH	M	Streptomyces avermitilis	Actinomycetes	WAVLGSGPLTGLAGAERHPGLAGLGAALDAGAGMPEFVVATAGPSEGSGGADAADDLAGQERDLAGQAHDLAGRALDLVRSWLADERFADSRLVAVTWNAVAVGEGDPLDPVQAAAWGLLSSAVTEHPGRIVLVDVDGTPRSLAAVRSAAGSDEPRVALRDGRAFAPRL
BGC0000122.1	phn2	M1	EDH	MA3	Nannocystis pusilla	Myxococcota	VVLGAGRLAARLGVRAVSEVAELLAGPAPRIVVIDASEAIERTGSNEHALKGMSGATYHSPDELRAQLGAALEPLQQLLAQPSLEAAQLVWVTEQAVSTGPADPVASLAQAGLWGMIRSARNETSRPLRLMDVEAGSSSELLWNALSQPEAPELAVRGSAVLRPRL
BGC0000122.1	phn2	M2	EDH	M	Nannocystis pusilla	Myxococcota	VVLGAGRLAARLGLRGVSEVAELLAGPAPRTVVIDATELARRADELRAQSSHTIEWTGSNGHGSMGMSDATGQDPDELRAQLSAALMPLQQLLAQPSLEAAQLVWVTEQAVSTGPADPVVALAQAGLWGLIRSARNETSRPLRLVDVEADSSSDLLWNALSQAEAPELAVRGAAVLRPRL
BGC0000122.1	phn2	M4	ZDH	M	Nannocystis pusilla	Myxococcota	WLVLGSPVIAPLRDAMRERGVTTTFADSIRDPRALEALAHADLLGVSYLAPALEYALSPPEQAADAIDRVSRALEESLEPLRHLTASRPGFPVQLSWLTQGCWLVRPDDVPGAEGQAALWGLGKSCTAEHPEYGGRLIDLPAGALLGEPSPTVIDHLVSSLLDEVAEKQLAIREDGIFLNRL
BGC0000123.1	plm1	M1	ZDH	M	Streptomyces sp. HK803	Actinomycetes	WLLLGEVPPALGSLFDDPLTAASWDRSTAPDGVLVGAGAAEDLLAALHEVAGHPTGPVWCVTSRAVGVGTVDDPAADVRAAGVWGLGRVAGLELPDRWGGLVDLPERIDDATRRALAGTLTDDGADDQDGEDQLAVRDGQLWARRL
BGC0000123.1	plm2	M2	ZDH	M	Streptomyces sp. HK803	Actinomycetes	WIVLAPPATDVSWTRDLAAHTLAVDLDATLDRPGLAARLIDVTHTATDPDGVLLFAAHPDILVTVLQALTDAGVDAPVWCLTHESDDALDTAAVWGAGRAAALELPDRWGGLVDLPPAGVRPQLDCLAGLLSADTGEDHLRLRPDGVSVRRL
BGC0000123.1	plm2	M3	AKR	M	Streptomyces sp. HK803	Actinomycetes	WWIVVPGDAADTTTADAVRQALAAAGANPRILTVDPDGTDRAALAKELQERAAADGTVVGTVSLLAESGGEDTGHRGVAAGALATLVLLQALHDADIPTRLWTLTRGAVRSGPADTAPDPWQAQVWGLGRVAALEHPALWGGLIDLPAEGEPAGLAAVLSGTAGEDQVALRGDGARARRL
BGC0000123.1	plm4	M4	B1KR	MA3	Streptomyces sp. HK803	Actinomycetes	WLLVHPGGTESDATTEWVRDGLLEAGCSVDDLLVDTTDTDTAAVTERLKQACAGGGPEPVGVVSLLAFDGRHDTACPSVPRGTAATLALVRALGAAGITAPLWCLTQGAVTTGTGDRLGAVEQAQIWGLGRVVALEHPDRWGGLVDLPSTLDPHVRTQLCAALGGAHTGEDQLALRPVGILGRRL
BGC0000123.1	plm5	M5	EDH	M	Streptomyces sp. HK803	Actinomycetes	WALIAAAESDGYEVKGVELSHCTSLPALAAALDATDAPVPEAVLVPCFLPHSPGCPPDDSADLVERAHDYAATVLDLVRTWLGDARFEASRLLLLTRGAVTPDAGHHPLSDAVGSLAWGLVRTVQNEHPGRVLVADLDDDPASWSVLPGVLAHEEPQVAVRRGVAHVPRL
BGC0000123.1	plm6	M6	A1KR	MA3	Streptomyces sp. HK803	Actinomycetes	WLLVGDDDRTKELARLCEAAEVLSPAGANRAALVERLGGAGPFDAVAYVGRDAERLLVLVQALGDTDVTAPLWCLTTGAVSTGPSDPPADPHGAALWGLGRVVALERPDRWGGLVDLPDSLDDRSAGLLAGVLVTAGDEDQLAVRANGVWARRL
BGC0000123.1	plm7	M7	AKR	M	Streptomyces sp. HK803	Actinomycetes	WLVVVQSGDDAGETTAALRVLTRILADTVLVETGTDRAEAKAALVDALADAPMLAGVVSLIQHPDALLTLLQALGDAGTGARLWCLTQGGVGTSDGEAPRSAHAGACWGLGLVAGLEHPDRWGGLLDLPARLGERATGRLAGILAGDVVEDQVALRDSGVLLRRL
BGC0000124.1	PieA1	M1	EDH	MM	Streptomyces piomogenus	Actinomycetes	AGAAAPLLLGAEQAEFAELADLLTAVAAGAPVPETVVVPYQPGPEPTAAAVHAAAADALGLVQAWLASDRLAASRLVLLTRGAVAVDPADDVADLVHAPLWGLLRSAQSENPGRFVLADTDEHPDSYPALVRALASPEPQLAVRAGRVSAARL
BGC0000124.1	PieA2	M2	A2KR	MM	Streptomyces piomogenus	Actinomycetes	WLVVVPAGHAEAAWVADATRMLGVRGARTVLLEVADADADREVLATRLRELLADDESDRAGVLSFLGLDDRRCPGKRTVTVGLSLTLTLVQALADLGVRAPLWCATHGAVSAGPSDAPADPVQAQLWGLGRVVALEQSQLWGGLVDLPEQPDERSLGQLVRVLAGASDEDQIAVRPAGLFARRM
BGC0000124.1	PieA2	M3	EDH	MM	Streptomyces piomogenus	Actinomycetes	ARAVHHAVLGGPDALTGIAGTAHPDLAALADAVGAGAPVPEAVVVPWMPEPDADTVSADAARQAVERALSLLQAWTADDRFAASRLVLVTRGAVDADDRGGSPDLAAAAVWGAVRSAQAEHPDRLVLVDLDCAVSEASATLPLLLDGAEPQYAVRAGRVFVPRL
BGC0000124.1	PieA4	M5	ER	MM	Streptomyces piomogenus	Actinomycetes	WVLLGTDRLGLTEGLRIGGHPDLAALAEAVAAGATVPDAVLVTCTGAESPDVPSAVRDLTADTLTLLQQWLSAEHFSTSRLVVLTSGAVPAGSGEGVRDLVAAPLWGLLRSAQTEHPGRFVLIDLDDRHSPAPQDALAAALATDEPQLALRDGRLYAPRL
BGC0000125.1	pimS1	M1	BKR	M	Streptomyces natalensis	Actinomycetes	WLVVLPEGGTDDPWTARLLDALNDQGLHTDVRELPADHEPDAWGRHPVDGVLCLLALDERPTRSCPPYRRGLAATTNAAARPEGAGIQAPLWCVTRGAVAVDRHEALKSPLQAQTWGLGRVAALESPQSWGGLIDLPDNLDGRAVSALLSTLAGEEDQVAVRPAGVFARRL
BGC0000125.1	pimS2	M10	BKR	M	Streptomyces natalensis	Actinomycetes	RLAVIPAGHEQDPLVADVVAALGPDTVRLTAPGSDRAALADLLRQQAADGTEFTAVVSLLALATEPAHSEPAHSEPAHPAHAPEALALTTTLIQALGDADLAAPLWCVTRGAVAAAPGEPVSGPAQAAVWGLGRVAALEYPQRWGGLIDLPAALDDRTAARLADVLAAPGGEDQIAIRPSAVLGRRL
BGC0000125.1	pimS3	M11	EDH	M	Streptomyces natalensis	Actinomycetes	VRCVSLGADELGVGASVASLADLSGDEDFVVLPVSGVGGDVPAAAHELTARTLGLLQEWSGREGSSGSRLVFVTRNAVSADEGESVRDVAAAAVWGLVRSAQSESPGRIALVDLEADSGDLAEVLAGLPGLLAAGDAQFVVREGAVRVGRL
BGC0000125.1	pimS4	M12	EDH	M	Streptomyces natalensis	Actinomycetes	VRCVSLGADELGVGASVATLADLSGDEDFVVVPVSGVGGDVPAAAHELTARTLGLLQEWSGREGTSASRLVFVTRNAVSADGGESVRDVAAAAVWGLVRSAQSESPGRIALVDLEADSGDLAEVLAGLPGLLAAGDAQFVVREGAVRVGRL
BGC0000125.1	pimS1	M2	EDH	M	Streptomyces natalensis	Actinomycetes	VATLGSLAGAPFDGYPDLASLARSGRVAGAVLVPVEAGAGEVVADDVVGATHATAARALDLARSWLADDRFAASRLVFVTRGAVSGADLAGAAVWGLVRSALSEHPGRFGLVDLDDDAELALVPRVLASDEPQLLVRGGEVLAARL
BGC0000125.1	pimS1	M3	EDH	M	Streptomyces natalensis	Actinomycetes	GTGPEGEPLRTYADLDSLEGAAVPGTVLVAPPSGAAGTVESVHAATVWALEMVQAWLADDRFATSRLVFVTRGAAFGADLAAAAVRGLVRSAQSENPGRFGLVDMDGDADTTVPAQALATDEPELLVRGGEVLAARL
BGC0000125.1	pimS1	M4	EDH	M	Streptomyces natalensis	Actinomycetes	LLGKDTEGILDTLSLQPHADLDDLAATGVHDTVLAPLPTRTAGTVESVHAATTGALALIRSWLADDRFAASRLVFVTRGAVSGTDLAGASVWGLVRSALLEHPGRFGLVDVDVDQDAEVPLVPRALASDEPQVLVRGGEVLAARL
BGC0000125.1	pimS2	M5	EDH	M	Streptomyces natalensis	Actinomycetes	AAVLGPDLFGLERALAPTDLTVTAVPGPDAAPHAPDVVLAPVAGTTEDDVVTSVHARTAHVLERLRTWLTDERYAASRLVFVTRGALATDARQASDPVAAAVWGLVRAAQSEHPGRFGLLDLDPGTTEPATEPLLRALALSSDEPQTAVRGTAVLTARL
BGC0000125.1	pimS2	M6	AKR	M	Streptomyces natalensis	Actinomycetes	WLLVTADGIDSDEILDALRGHGAQFETLVLDDACRDRAHLAGRLAAVRDQDRPLTGVLSLLPLADRSGAEAGAEAGAETGAQPSTGLALSLVLIQALADTGLAAPLWTLTRGAVTTGADDPLTHPLQAAVWGLGRVAALEHPQLWSGLIDLPAALDAPATQHLVSALAAEGGEDQIAVRATGAFGRRL
BGC0000125.1	pimS2	M7	A2KR	MM	Streptomyces natalensis	Actinomycetes	WLVVAPEGADTDTLTGVLAAHGAGTRTLVLDDSCADRATLTARLTGLDGAADLTGVVSLPAPADEASATHPTLSRAVTLTVALVQALGDAGIDAPLWCLTQGAVSTGRADRLTRPDQAQILGLGWTAALEHPQRCGAGLVDLPEELDRRAGERLAAVLTGRSGEDQLAVRSSGVFARRV
BGC0000125.1	pimS2	M8	BKR	M	Streptomyces natalensis	Actinomycetes	WLVLAPADGDRAWTDAVAGALGADAVRVEVSTAQRQELAERLSELAAEHGEFAGVLSLLATAGEGAEDADDATTEGLLLTATALQALGDAGIDAPLWCVTRTAVAVDRAEHPARPAQAAVWGLGRVAALEHPQRWGGLVDLPDELDGATLRRLAAVLADSGDEDQLAVRTTATFVRRL
BGC0000125.1	pimS2	M9	CKR	M	Streptomyces natalensis	Actinomycetes	WLALVPTGAADDEWTTAVLAALGDAVVIAEVDPADRGAFAGRLGELAERGTEFTGVVSSSQSRTPSPSPSDRPGPTRRWRALAEAGIDAPLWCVTRDAVPVDRSESEVSPAQAAVWGLGRVAALDHPDRWGGLVDVPQEHDRRTAERLRAVLSGAGDEDQVALRPSGAFGRRL
BGC0000126.1	pldAI	M1	A1KR	MM	Streptomyces platensis	Actinomycetes	WLVAVPHEDAYVSQVLRGLGDRGATVITLRADDPRHGPLAERVREALAGAGEITGVLSLLALDERPHPEHPVLPMGLALNTALVRALVDKDVRAPLWCATRGAVSVGRSDRLGSPAQAMVWGLGLVAALEHPRHWGGLVDLPETVDERVLNRLVTVISGQRVHGQGAPGQDGENPGDEDQLAVRASGVFARRL
BGC0000126.1	pldAIV	M10	BKR	M	Streptomyces platensis	Actinomycetes	WALLGGADALPGQGFADLASLGETIDGGSAAPRTVCVPLLPPADGAQDSAATHDAAHRALALAQAWLADDRFTSSRLVFLTRGAVAVTDEEYPEDSVDAFAYASVWGLLRSAQTENPGRFGLVDLDPDADPDAAGQRCPVPAAALDGDEPQLAMRRGVVHAPRL
BGC0000126.1	pldAI	M2	EDH	M	Streptomyces platensis	Actinomycetes	WAVLGPDPLGAANALNLTGTSCSCYPDLAALIAAVDGGAAVPEAVLAPYAAEPAPDAGSPADAVRASTGRALQLLQSWLSEDRLERSRLIVLTRGAVAVGTDEGVTDLVSASVRGLVRSAQAEHPGRFSLVDIDDREESWAVLSAAAVSDEPQLALRCGQMKVPRL
BGC0000126.1	pldAI	M3	ER	MM	Streptomyces platensis	Actinomycetes	WAVLGGNAGGILGTDGSAGLLAGVPIDAYRDLAELRDRTGPSSAFPAVVVAPVATGTGAAPDAVREVTYQVLDMIQSWLADDRSASSTLLLVTRGAVSTGFGDDLVDLGQAAVWGLVRAAQSENPDRFVLLDLDGSEPVGPLPTAALLSGEPQLAFREGKVLTARL
BGC0000126.1	pldAII	M4	EDH	M	Streptomyces platensis	Actinomycetes	CAMLAPDEPDLTSAPAWPGSSAQRYAGLAALAEICGTDGPVPAVVLAPFLPGDAAPADTAAATHATTRRAAALIKGWLGDDRFTDSRLVFVTRGAVATSGRDELHDLEHSTVWGLVRSAQTENPGRFALLDLDDPDTVTELPEAILADQAQLVLRDGRL
BGC0000126.1	pldAII	M5	EDH	MM	Streptomyces platensis	Actinomycetes	WAVLGPDPLGAANALNLTGTSCSCYPDLAALIAAVDGGAAVPEAVLAPYAAEPAPDAGSPADAVRASTGRALQLLQSWLSEDRLERSRLIVLTRGAVAVGTDEGVTDLVSASVRGLVRSAQAEHPGRFSLVDIDDREESWAVLSAAAVSGEPQVALRCGQMKVPRL
BGC0000126.1	pldAII	M6	B1KR	MM	Streptomyces platensis	Actinomycetes	WWVVVPAHAGDADRERAQAVRGTLESSGRARTILVAVDPAADDRGSLELKLRDAATEAGPPAGVLSLLATDERPLPGHDVVPGGLAANLALVQALGDAQIDAPLWVGTCGAVSAGRSDRLANPGQAAVWGLGRVVALEHPERWGGLIDLPVVLDPRAVERLVTVLAASGEEDQLAVRASGVLVRRL
BGC0000126.1	pldAII	M7	EDH	M	Streptomyces platensis	Actinomycetes	WALIGTPPGADFTPGEDGVIIGSYPDMAALTDALDKGVAVPQRVLLSAPSEEEQDQAHDLASAVDKATNALLAVLQQWLSDDRFDSSRLAVLTRHAVSTAGQEDVTDLAHASWWGLVRSAQSEHPDRFVLADTDGTQISHAALLPALLSGEPQVALRDGTRYVPRL
BGC0000126.1	pldAIII	M8	A1KR	MM	Streptomyces platensis	Actinomycetes	WLIVVPAGTADQQWAEALSRAAEGLGDQAVRVELGRAEAGREEYAARLAEAAAGGPVAGVLSLLALAEEPADADPVWRPYVTSTLALMQALGDAGIGAPLWLATRGAVSIGRSDKPVPSTAAQAQLWGLGRVMGLEHPERWGGLVDLPETADARATARLAGILAGGLGPEDQCAVRSSGVYVRRL
BGC0000126.1	pldAIII	M9	ER	M	Streptomyces platensis	Actinomycetes	CAVIGDADAAALLGAEAHPDLASLGEAVPPLVVAVAGGDGTRAALERALGWVQGWMAEERFAGSRLAVVTRGAVAVGAGEVLADAAGAAVTGLVKSAESENPGRFLLVDVDGTTESWRALPTLGGGDEPQIALRDGQAYVPRL
BGC0000133.1	QmnA1	M1	EDH	MM	Amycolatopsis orientalis	Actinomycetes	EAAGTPAAPAQVVNFGGDDVHAVTAAALDAIQAHLDREDDGPLVVVTERAVSTEAGEGVDDLGAAAVWGLVRSAQTEHPGRFVLVDTDGAAPVVVADEPQVAVRGGRALVPRL
BGC0000133.1	QmnA1	M2	EDH	MM	Amycolatopsis orientalis	Actinomycetes	PAPEYEVVQCPPGEHGVPLNTYELVAHLLAQLQDRLAGDDPAKLVVLTRGAVALPGESVEDLAGAAAWGLVRSAQTEHPGRFVLADVQDATQDALDTALASGEPQLVVRGDTAYVPRL
BGC0000133.1	QmnA1	M3	EDH	M	Amycolatopsis orientalis	Actinomycetes	AAPVETEVLHAGGTDVLEATWQVATALQQHLADDRGRLTVVTPADELSSAAIHGLVRAAQREHGDRFSLVDTDQPDTVPLTGAPELRVRGGEVLAPRL
BGC0000133.1	QmnA2	M4	EDH	MM	Amycolatopsis orientalis	Actinomycetes	ATPEVVRADGLDITTALQLVQQAIADDRRLTFVTSGAVSTEPGEDVTELAGAAVWGLVRSAQTEHPDRFTLVDTDAPDAIPAVAEPQVAIRNGKALVPRL
BGC0000135.1	revD	M10	EDH	MM	Streptomyces sp. SN-593	Actinomycetes	LRVVGAPEDLVVEDLVPGEVVVLEAVGTAGEVVGSAHGLAGWVLAQVQGWLGDERCAEGRLVVVTRGAVSAVPGEVLADVAASVVWGLVRSAQAENPGRIVLLDLDQRASAVDAGLVAGVVAAGEPQAVVRDGVVRAARL
BGC0000135.1	revD	M11	A1KR	MM	Streptomyces sp. SN-593	Actinomycetes	WAVIVPEGHADDPWSAAVAEAVGGELIEDDGSAPELSPACPGVLSLLSARDDVEGLLSTVRLVQHLRAPVWAVTRGAVAVRPEERVSGVWQGATWGIGRVAALELSERWAGLLDLPDVIDDAVRERLRTVVAGGHGEDQVAVRSSGLFARRL
BGC0000135.1	revD	M12	EDH	M	Streptomyces sp. SN-593	Actinomycetes	MSVGVDGGVAVFRAPEDVVPGEVVVLEAVGTAGEVVGSAHGLAGWVLAQVQGWLGDERCAEGRLVVVTRGAVSAVPGEVLADVAASVVWGLVRSAQAENPGRITLLDLGAGEGVGSVDRAVVVGAVASGEPQLVVRDGVVRAARL
BGC0000135.1	revA	M2	EDH	MM	Streptomyces sp. SN-593	Actinomycetes	AGAEPGAAPAQDGDVLLEVPAAADGSPESVHAAVAWTLGQLQGLSGGRLVVLTRGAVAALPGETVTDLAAAAVWGLVRSAQSEDPGRIVLVDADEGTRATRDLLARVAGTGEPQLAVREGALLAPQL
BGC0000135.1	revA	M3	EDH	M	Streptomyces sp. SN-593	Actinomycetes	LRVVGAPEDLVVEDLVPGEVVVLEAVGTAGEVVGSAHGLAGWVLAQVQGWLGDERCAEGRLVVVTRGAVSAVPGEVLADVAASAVWGLVRSAQAENPGRITLLDLGAGEGVGSVDRAVVVGAVNSGEPQLVVRDGVVRAARL
BGC0000135.1	revB	M4	A1KR	MA5,7,8,10	Streptomyces sp. SN-593	Actinomycetes	WLAVADRADDPWTTGVAEALGPDTTVLARADATAERLAAPGYDGVVWLPPAGADGPAATLALVQALRASGQGAPLWVLTRAAVSARPGEPVSGMWQGGIWGLGRVAALELPDLWGGLVDLPEEFDAAVAARLGGALSTAHGEDQLAVRASGVVARRL
BGC0000135.1	revB	M5	ER	M	Streptomyces sp. SN-593	Actinomycetes	AVVAGPGQRVDWLPGAVLHPHAGDVVSDAALPLVIAVTGGDRPVEGAHEATRWMLDQLQTWQSGARELVVVTSGAVAAGPDESVTDLGAAAVWGLVRSAQAENPGRITLVDTDAATGMTAGLLAAARATGEPQLAVRAGRLHAARL
BGC0000135.1	revC	M7	ER	MM	Streptomyces sp. SN-593	Actinomycetes	PVAAGPDAEVPWLPGVPVHRDLADVRPEAGRPVVLAVAAQDGPVVAAAHAAARWVLEQVQTWLRDAAFAGSSLLVLTRGAVAAGATGAGGEVADLAAATAWGLVRSAQAENPGRITLVDTDPSAAVAAGPLAAALAGGEPQLALRAGRLRAPRL
BGC0000135.1	revC	M8	AKR	M	Streptomyces sp. SN-593	Actinomycetes	WLAVVPEGDDPWTGAVLKALGPDVTVLSPEAADAEALARAGADRTGVVALAADGTSGLTAVLRLVQEVRRAELAVPLWVATRAAVAARPGERVETVWQGGIWGLGRVAALELPDLWGGLIDLPGEPDPVALDRLAGVLSGGHGEDQLAVRASGVLARRL
BGC0000135.1	revD	M9	EDH	MM	Streptomyces sp. SN-593	Actinomycetes	FTVVRGPAGATPAAVATDDADSDADSDAGTDAEPSDLVVLEVAPEGDQVVEAVHATANWVLGRLQAFTGTRMAVVTRGAVAAGPGETVTDLAAASVWGLVRSAQTEDPGRFVLLDIAPDAAPDAVLDAALVARAFAADEPQLALRGEVFRSPRF
BGC0000136.1	rifE	M10	EDH	MM	Amycolatopsis mediterranei S699	Actinomycetes	WLPVATAEEVATLADDVLTGATEAPAVAVMEAVADEGSVLALTVRVLDVVQCWLAGGGLEGTKLAIVTRGAVPAGDGVVHDPAAAAVWGLVRAAQAENPDRIVLLDVEPEADVPPLLGSVLADGEPQVAVRGTTLSIPRL
BGC0000136.1	rifB	M5	0DH-A1KR	MM	Amycolatopsis mediterranei S699	Actinomycetes	SIADSAVPANIEVVEAFGEEPLELTGRVLEAVQTWLVTAADDARLVVVTRGAVREVTDPAGAAVWGLVRAAQAENPGRIFLIDTDGEIPALTGDEPEIAVRGGKFFVPRI
BGC0000136.1	rifB	M6	0DH-B2KR	MM	Amycolatopsis mediterranei S699	Actinomycetes	WVRIDTADDVAALAEKADAPPVVVWEAAGGDPALAVSSRVLEIMQAWLAAPAFEEARLVVTTRGAVPAGGDHTLTDPAAAAVWGLVRSAQAEHPDRVVLLDTDGEVPLGAVLASGEPQLAVRGTTFFVPRL
BGC0000136.1	rifC	M7	0DH-A2KR	MM	Amycolatopsis mediterranei S699	Actinomycetes	TVDSAVPAGRAEVLEAFGEEPLDLTGRVLAALQAWLSDAAEEARLVVVTRGAVPAGDGVVSDPAGAAVWGLVRAAQAENPDRFVLLDTDGEVPLEAVLATGEPQLALRGTTFSVPRL
BGC0000136.1	rifD	M8	0DH-B1KR	MM	Amycolatopsis mediterranei S699	Actinomycetes	ESGVVAAADDTEVLEVPAGDSPLAATSRVLERLQTWLTEPEAEQLVVVTRGAVPAGDTPVTDPAAAAVWGLVRSAQAENPDRIVLLDTDGEVPLGAVLAGGEPQVAVRGTALYVPRL
BGC0000136.1	rifE	M9	EDH	M	Amycolatopsis mediterranei S699	Actinomycetes	ADHVEVLEAVGEDPLELTGRVLEAVQTWLADAADDARLVVVTRGAVHEVTDPAGAAVWGLIRAAQAENPDRIVLLDTDGEVPLGRVLATGEPQTAVRGATLFAPRL
BGC0000141.1	rubB	M5	0DH-BKR	M	Streptomyces achromogenes subsp. rubradiris	Actinomycetes	VSVTSAEDVAALAAGPGRPTAAVYDVPTGTSHPAAVLADVLGLLQAWQRHAPADTRLVVRTEGAVDGGTGGLTDATGAAVWGLTRAAQAEMPGVLLLDVEPGLDTAPALATALAVDEPQLAARTDGFRVPRL
BGC0000142.1	slmN	M1	EDH	M	Salinispora tropica CNB-440	Actinomycetes	WCVLGDERIDAAPRYPDAAALGAAIDAGATAPEWTFAGVRAGDVRAATADALATLQQWLSDARLAGTRLVFVSRIDDLATEAVWGLVRAAQTENPDRFVTVRLTDVPSSLLATALATGEPELRLRDGEISVPRL
BGC0000142.1	slmD	M10	EDH	M	Salinispora tropica CNB-440	Actinomycetes	WAYHSAARPELAPTGTAQAVPSADPLARDGATAAALLVLTAGLGADVAGPQAVHDEVNRVLGLVQEWLAGPNTHRLAVLTRGAVGDDVTDLAGAAVWGLLRSAQAENPDRFLLVDADTDQLSDVLSLALAAGEPQVRVRGGVVSVPRL
BGC0000142.1	slmD	M11	EDH	M	Salinispora tropica CNB-440	Actinomycetes	WALIGADEFKVAAALDTVGLAAEAHPGLDALTAALDAGAAAPDVLVASVQPDCHDLAAGARQTTGHLLALLQTWLVDERLASSRLMILTHGAQGTTVTEPAAAAAWGLARSAQSENPGRIVLVDLDDHDESALALPAVLAGGEPQLVLREGVAHAARL
BGC0000142.1	slmN	M2	EDH	M	Salinispora tropica CNB-440	Actinomycetes	WGYLEGLGLGVPDVVLAPLTRAGDATDPATAARTVAGQTLAILQSWLADPAQAAARLVVITDGAVDGGTDLVYAPVWGLVRAAQAENPGQFVLVDADPGTPVEEVLAAVGTGEPELSLRGGQVRVPRL
BGC0000142.1	slmN	M3	EDH	MM	Salinispora tropica CNB-440	Actinomycetes	WAYLDDLADDVPELVVARLTDVHPAATPDPGDGPAVDTESAARTAVGATLALLQSWLADPRLAESRLVILTDGAVDGGTDLVYAPVWGLVRAAQAENPGQFVLVDADPGTPVEEVLAAVGTGEPELSLRGGQVRVPRL
BGC0000142.1	slmN	M4	EDH	M	Salinispora tropica CNB-440	Actinomycetes	TVVLGDDDLGLGVPCHPDLAALAADIERTGAVPRTVAVAWHTTSDSTVAAATGALALVQGWLADERFTASRLALVTTRAVATAEGEDVPRPVDATIVGLVRAAQEENPGRLALVDLDGADPTRLRAALAVDAEPQLAVRRAELFAPRL
BGC0000142.1	slmA	M5	EDH	M	Salinispora tropica CNB-440	Actinomycetes	WTWHPDTTPAPTGDGVTPTTGPGPGDGPPELVVLPAGGTDDVHVEVNRVLAIAQRWLAGTTTAPLVVLTRGAVGDDVTDLAGAAVWGLLRSAQAENPDRFLLVDADTDQLSDVLSLALAAGEPQVRVRGGVVSVPRL
BGC0000142.1	slmA	M6	ZDH	M	Salinispora tropica CNB-440	Actinomycetes	WTPIDAEAELPDPAPGTVVVTLDPPGTPPAAVHAAAERLLALLHRWLTEPGYAAATLVLHTRDAVGAGDTPVNPAQAALWGLVRAAEAEHPGRFVLVDTDGTGTDHLAAALATGEPEVAVRDGRLLVPRL
BGC0000142.1	slmB	M7	AKR	M	Salinispora tropica CNB-440	Actinomycetes	WWVVTPSALTDDPRAAAVADALTARGATVVRLTDAAPHDRDTPAGVVSLLGLDDTSDTLNAGLSAGVTGTVRLVHALAAADFTGRLWCLTTGAVAVDPYEDLPHAAQAGLWGLGTVLSLDYPGWWGGLADVPADWTPDILDRLVDVLTDGGEDQVALRNGGVLARRM
BGC0000142.1	slmB	M8	AKR	M	Salinispora tropica CNB-440	Actinomycetes	WWVVVPVTLAGDARVRAVIEGLAARGAEVVMVVGVDLPVGDIPAGVVSLLALDDSRDDTGVGLSAGVVDTVRLIQALAVTGRMGRVWCVTSGGVAIDRFEPVIDLAQGALWGLGTVLSLDYPDWWGGLVDLPVDWTDAHVERFVDVLADGGEDQVAVRTVGVLARRM
BGC0000142.1	slmC	M9	A1KR	MM	Salinispora tropica CNB-440	Actinomycetes	WWVVVPVTLAGDARVRAVIEGLAARGAEVVMVVGVDLPVGDIPAGVVSLLALDDSRDDTGVGLSAGVVDTVRLIQALAVTGRMGRVWCVTSGGVAIDRFEPVIDLAQGALWGLGTVLSLDYPDWWGGLVDLPVDWTDAHVERFVDVLADGGEDQVAVRTVGVLARRM
BGC0000144.1	slnA1	M1	EDH	MA3	Streptomyces albus	Actinomycetes	WAEIGGSAFPDLAALTAALDEGMAVPPVVVVAREPEEVADPGLLAERARAATAGMLALVQDWLAEDRFAGSRLAVVTRGAMAVRAGEDVTDLVHAPLWGLLRSAQSENPDRFVLLDRDPWDSTGGDLPAALATGESQLAVRDKALLVPRL
BGC0000144.1	slnA7	M11	B2KR	MM	Streptomyces albus	Actinomycetes	WLIIEPEGQAEDLAEAAAQQLKEHGAQSIRIPVEIDAADRYTLAQQIHETLTEGTEITGVLSLLSLDERPHPEYEALPLGLAGTVTLVQAVLQVRELAEFDAPVWSLTQGAVSIGDTDAVTSPVQAAVWGLARVLVQEHPRLWGGIVDLPQQVDEKAWTRLARVLTEPGDEDQLAIRSWDILVRRL
BGC0000144.1	slnA8	M12	A1KR	MM	Streptomyces albus	Actinomycetes	WLLVVPEGADTLAASCAGALERHGADTLTLPAATADRTALAETLGALAGTPLAGVLSLTGLAAEDPALLTLTLAQALADAGLTAPLWCATRGAVSAVRGDAPATPAQAQVWGLGRVLALEAPRTWGGLIDLPAAPDERALTRFVQALAASGEEDQIAVRDTGLYGRRL
BGC0000144.1	slnA8	M13	ER	M	Streptomyces albus	Actinomycetes	WAVLGADTPGLADTLRTAGAAASYPDVAAMKAALTAGDPLPDTVLLPLGPQTGAQEAGADAVRESTARLLGHLKDWFADTSLEDVRLAVLTRGAVATRTGEDVTDLAHAPAWGLVRSAQTENPGRLVLLDLDPKAEAPAAALPGALAATAEADEPGAALRGETLLVPRL
BGC0000144.1	slnA1	M2	ER	M	Streptomyces albus	Actinomycetes	WAVLGEQLPAAHRTDGSPVYADVAELLAAARGEAGAPAAVLLPVPRAENGVTAEAVHTESARLLAVLQAWLAEELLEGTKLVVLTHGAVAARHGEDVGDLTHAALWGLVRSAQTENPGRFVLVDTDLSAASAAEGAENTAEDLSVLAAVATGEDQIAVREGRFLTPRL
BGC0000144.1	slnA2	M3	EDH	MM	Streptomyces albus	Actinomycetes	PDPDRRELPALRAALDAGEAAPAHVLVELTPEDGADSPALAAHTATRRTLALLRDWFAEERLTASRLVLLTRGAVRTAPGEGPADLALAAVRGLVHSAQTENPDRIQLLDTDGTEASTAVLHRALLSEEPELALREGEFRAPRL
BGC0000144.1	slnA2	M4	ER	M	Streptomyces albus	Actinomycetes	LRIGAGDAPGAPYRASHPDVAALTAALDADATPPGAVVLDVPGATASGAEAARETAAAVLGVLQEWLAAEQLADVRLFVRTRRAVAVRSGEDVTALAQSPVWGLVRAAQAENPGRLVLVDTDADWDTPLPEAVFAAAEEPQLAVREGALLAPRL
BGC0000144.1	slnA4	M7	C2KR	MM	Streptomyces albus	Actinomycetes	WLLVTGDGVEAEILKTGESALSAHGATVHPLTLTGEGEREALVRQLLGAEVEHGPFAGVLSLLATAEPERGPATTLALVQALADAECEAPLWVATRGAVGTGPEEAPAHPAQAGAWGLGLVAALERPGGWGGLVDLPAEPDENLAGRLAAALAGQEDQLALRATGTYVRRL
BGC0000144.1	slnA5	M8	ER	MM	Streptomyces albus	Actinomycetes	WALLGEDRLDLLAAFEQLGHFPQIFDEVAVLGESVDAGLPAPGVVVLPLGGQASGGSLAEAPGRATAQLLAVLQEWLADSRLEDSRLVVATRGAVSVRPGEDVTDLAHATAWGLLRSAQAENPGRILLVDLDAADPDAAGLLPRAVALAAEHTEPQAAVRAGAVLVPRL
BGC0000144.1	slnA5	M9	A1KR	MA3	Streptomyces albus	Actinomycetes	WLAVLPAGAESETKAVLDALAARGARLRTVTLDPAAPDREAWARELTEAAEQEPAGLLSLLGLAEEREAAATGTLVLFQALTDSGLGAPLWALTRGAVATPGDGPADPVQAQLWGFGRVAALEQPRDWGGLVDLPEEFDERAADRLARVLAGLGDEDQVALRETGAFGRRL
BGC0000147.1	sorA	M1	BKR	M	Sorangium cellulosum	Myxococcota	WLLVVPSALGDDALLATLTEALTRRGARVLALRVSDIHIGRSALVEHLREALAETAPLRGVLSLLALDEHRLADRSALPAGLALSLALVQGLDDLAIEAPLWLFTRGAVSIGHSDPITHPTQAMIWGLGRVVGLEHPERWGGLVDVSAGVDESAVGRLLPALAQRHDEDQLALRPAGLYARRI
BGC0000147.1	sorA	M2	ER	M	Sorangium cellulosum	Myxococcota	SAVLLGIGGLDLAPEVPLARVADLAALQSALDQGASPPGLVVVPFMARTADDLIQSAHSITARALALLQAWLADERLASSRLVLLTRRAIAARADEDVKDLAHAPLWGLARSAQSEHPELPLFLVDLDLSEASQHTLLAALETGERHSRLRNGKPFIPRL
BGC0000147.1	sorA	M3	ER	MA21	Sorangium cellulosum	Myxococcota	KGVLLETGGLDLALQASLARYDGLAALRSALDQGASPPGLVVVPFIDSPSGDLIESAHNSTARALALLQAWLDDERLASSRLVLLTRQAIATHPDEDVLDLPHAPLWGLVRTAQSEHPELPLFLVDLDLGQASERALLGALDTGERQLALRHGKCLVPRL
BGC0000147.1	sorB	M4	AKR	M	Sorangium cellulosum	Myxococcota	WLVVVPAALDDDALPSALTEALTRRGARVLALRLSQAHLDREALAEHLRQACAETAPIRGVLSLLALDERPLADRPALPAGLALSLSLAQALGDLDLEAPLWFFTRGAVSIGHSDPLAHPAQAMTWGLGRVIGLEHPDRWGGLVDVCAGVDESAVGRLLPALAERHDEDQLALRPAGLYARRI
BGC0000147.1	sorB	M5	0ER-YEDH	M	Sorangium cellulosum	Myxococcota	SGVLLGTGGHDLALDAPLARYADLAALRSALDQGASPPGLVVAPFIDRPAGDLVPSAHEATALALALLQAWLADERLASSRLVLVTRRAVATHTEDDVKDLAHAPLWGLARSAQSEHPDLPLFLVDIDLSEASQQALLGALDTGERQLALRNGKPLIPRL
BGC0000147.1	sorB	M6	A1KR	MM	Sorangium cellulosum	Myxococcota	WLLVVPSALGDDALPATLTDALTRRGARVLALRLSQVHIGRAALTEHLREAVAETAPIRGVLSLLALDERPLADHAALPAGLALSLALVQALGDLALEAPLWLFTRGAVSIGHSDPLAHPTQAMIWGLGRVVGLEHPERWGGLVDLGAALDASAAGRLLPALAQRHDEDQLALRPAGLYARRF
BGC0000147.1	sorB	M7	A1KR	MA21	Sorangium cellulosum	Myxococcota	WLLVVPAALDDDALPSALTEALARRGARVLAVRLSQAHLDREALAEHLRQACAETAPPRGVLSLLALDESPLADHAAVPAGLAFSLTLVQALGDIALDAPLWLFTRGAVSVGHSDPIAHPTQAMTWGLGRVVGLEHPERWGGLVDVGAAIDASAVGRLLPVLALRNDEDQLALRPAGFYARRL
BGC0000147.1	sorB	M8	0DH-C2KR	MM	Sorangium cellulosum	Myxococcota	GALLGTEGLDLGTRVPLDRYTDLAALRSALDQGASPPSLVIAPFIALPEGDLIASARETTAHALALLQAWLADERLASSRLALVTRRAVATHAEEDVKGLAHAPLWGLARSAQSEHPERPLVLVDLDDSEASQHALLGALDAREPEIALRNGKPLVPRL
BGC0000148.1	spnA	M1	AKR	M	Saccharopolyspora spinosa	Actinomycetes	WLVFAPHGWSSEPEVVDCVTALRARGASVVLVEADPDPTSFGDRVRTLCSGLPDLVGVLSMLCLEESVLPGFSAVSRGFALTVELVRVLRAAGATARLWLLTCGGVSVGDVPVRPAQALAWGLGRVVGLEHPDWWGGLIDIPVLFDEDAQERLSIVLAGLDEDEVAIRPDGMFARRL
BGC0000148.1	spnB	M2	ER	M	Saccharopolyspora spinosa	Actinomycetes	CVLLGTSEVSADIQVYPDLRSLTAALDAGAEPPGVVIAPTPPGGGRTADVRETTRHALDLVQGWLSDQRLNESRLLLVTQGAVAVEPGEPVTDLAQAALWGLLRSTQTEHPDRFVLVDVPEPAQLLPALPGVLACGEPQLALRRGGAHAPRL
BGC0000148.1	spnC	M3	A1KR	MM	Saccharopolyspora spinosa	Actinomycetes	WLLVVPPGGIEEALVERLTDALNTRGISTLRLDVPPAATSGELATELRAAADGDPVKAILSLTALDERPHPECKDVPSGIALLLNLVKALGEADLRIPLWTITRGAVKAGPADRLLRPMQAQAWGLGRVAALEHPERWGGLIDLPDSLDGDVLTRLGEALTNGLAEDQLAIRQSGVLARRL
BGC0000148.1	spnD	M7	AKR	M	Saccharopolyspora spinosa	Actinomycetes	WLVVLPADVPRDQPAVVIDALIARGAEVAVLELTEQDLQRSALVDKVRAVIADRTEVTGVLSLLAMDGMPCAAHPHLSRGVAATVILTQVLGDAGVSAPLWLATTGGVEAGTEDGPADPDHGLIWGLGRVVGLEHPQWWGGLIDLPETLDETSRNGLVAALAGTAAEDQLAVRSSGLFVRRV
BGC0000149.1	spiD	M1	EDH	MM	Sorangium cellulosum	Myxococcota	WALVGSDVALAEALGSRAHVTTYADWATLADALAGGAQPPVAIVVRCASHDTTRDVAAAAHDATARALALVTAWLADERLATCALAVVTESAIATRAGEDVADLAHAPLWGLLRTAQTENPDHALVLVDVDDTIASRGALAGALDAALAAGEPQIALREGRRLTPSL
BGC0000149.1	spiJ	M14	ZDH	M	Sorangium cellulosum	Myxococcota	WLVVAPEHGEGPRLARAVGRALSARGAEIVELAVGDGDATRDHLDARMRGALAGREALRGVLSFASLDETPLAADAAIPRGLAVTLALVQALGDVAGDAPLWLFTEGAVSTSATDPIASPAQAMTWGLGRVVALEHPARWGGLIDLGKDALDPADALDRVLAALATRDDEDQLAVRPSGLYARRL
BGC0000149.1	spiJ	M15	BKR	M	Sorangium cellulosum	Myxococcota	GRVAFVGGDPATPFDAGAAEAAVAYGDLAAMTDAVAGGATPPDVAVVSFVSPDETRETMHVSSVAAASAVHDATARALALFKAWLADERFASCALVALTRRAVATCPGEDIEDLAHAALSGLVRSAQAEHSDRAILLVDVDGTGASRRALAGAIATARTSLEPALALRDGRCLAPRL
BGC0000149.1	spiD	M2	ER	MM	Sorangium cellulosum	Myxococcota	WAILDDGRAFARALAGAVGSDATSYDDVGAIAGAPSTRPAPAVVIAPCADDAANADARGIVEAAHVATARALALLHAWLAEPRLATSALVIVTRHAVATSADEDVKDLAHAPVWGLVRAAQTEHPDRAIVLVDIDGGDASLSALATALDVSEPQLALREGRRLVPRL
BGC0000149.1	spiE	M3	A1KR	MM	Sorangium cellulosum	Myxococcota	WLALTPAAGGELARAVTAALAARGAAVVTVDVAHDDADRGRLATRLRAAIADGVTVRGVLSFAALDETPLPTHAAVPTGLALTLALAQALGDAGITAPLWLFTRGAVSIGSADRLTRPAQAMTWGLGRVVGLEHPERWGGLVDVGEALGAGSALGARGLAHLVAWIAQRGDEDHVALRPAGLFARRL
BGC0000149.1	spiE	M4	0DH-B2KR	MM	Sorangium cellulosum	Myxococcota	WAILGGDDALARAFASAGIAVEAHRDVASMTGALARGAAPPSVVVAPYASSDAGGSAARSHEAAASALALLEAWLADERLAPCALVVLTTRAIATRPDEDVRDLAHAPLWGLVRAAQAERPDRAIFVVDTDGEGASHRALAAALDGAEPQLALRGGRRLAPRL
BGC0000149.1	spiF	M5	AKR	M	Sorangium cellulosum	Myxococcota	WLIVARAGVAEDVAASLARLLEARGAEVVHLRLGGDDARRERTAARIREAIGDAGAVRGVLSLAALDDGTRWRDASLPAGLALTLGLVQALGDVGVAAPLWLVTRGAVSTGRADLLGSATDAMIWGLGRVVGLEHPERWGGLVDLASGVDATALDRLAPFLASRDGEDQLALRPTGIFARRL
BGC0000149.1	spiG	M6	CKR	M	Sorangium cellulosum	Myxococcota	WLVVRAAGAYDGVVESVVRALEGRGGDVVTLGLGADACARAELAARLREAVAGRGALRGVLSFVGLDDGPSTSQPAVPAGLARTLTLVQALGDSALDARVWLFSRGAVSVSRADAIVNPAQAATWGLARVVSLEHPERLGGAVDLASSLGASGALDAAAIDHLVAALGGALAGEDELALRPEGLFARRL
BGC0000149.1	spiG	M7	ER	MM	Sorangium cellulosum	Myxococcota	WAILGSDARLASALEAAGAHVTRHRDPGAWIDAIRGGGAPEVVAVLACTTRPDAPSGALAATHGAAADALAALQAWLAEERLASCALVVLTERAVATRPDEDVLDLVHAPVWGLVRAAQVENPDRALILVDVDADDASLPALPALVAAAVARAADASEPQLALREGRRLVPRL
BGC0000149.1	spiG	M8	A1KR	MM	Sorangium cellulosum	Myxococcota	WLVVAPEVAGALADGVARALEARGARGVLVPVDAEDAARTPLAGRLRAVAGGQAIRGVISFAALDERPAPLEPSVPLGLAVSLGLVQALGDAAIDAPLWLVTRGAVAVGASERVTRPLQAMTWGLGRVVALEHPERWGGLVDLGEESAPDANGARDANVHDRLANLVARRDDEDQLALRAAGTYVRRL
BGC0000149.1	spiH	M9	B1KR	MM	Sorangium cellulosum	Myxococcota	WLVVAPAGVASDLASALAAALTERGADVVPLALEASDITAHDAASRLRDAIAGRPAIRGVLTLTPLDTAPLDGRPAVPAGLARSLALVQALAELAIEAPIWIVTRGAVAIGRSDRIESPVQAMAWGLGRVVSLEQPERWGGLVDLPRAHADGALDATAIERLVAALGSREGEDELALRPTGLFARRL
BGC0000153.1	stiA	M1	EDH	MM	Stigmatella aurantiaca Sg a15	Myxococcota	WVLFADGTGVAEGLAAQIAARGEPCIRVLPGMAFAEAEDGHFVVDPEQPEDVRKLFGALSRTSTIPLRGIVHLWSLDAPSPEEGGVDALSRARRLGSGSVLSLIQGLNAAELAQKPRLWLVTRGVQAVGSAGPGAGAVAQSPLWGLGQVVAYEHAELRCTRVDLAPVSVPGEEQTLLQELLAPAGDDQVALRGRERHVPRL
BGC0000153.1	stiD	M4	OMT-A1KR	MM	Stigmatella aurantiaca Sg a15	Myxococcota	VLLLADQAGIARALSTKLTEQGVRCILVEPGDAYQREEDHFVVRLGEPGDMAQLVKDVAESGGLRAILHLWSLRAAPLGETTAATLRKAEKLGCGSTLHLIQALSRTSSRLPPRLWLVTRGAQPVSNAPGTVVVSPAQAPLWGLGRTLALEVPSLWGGLVDVDSAASASDIAEQLAGEVLHSDGEDQVAFREGARFVARL
BGC0000153.1	stiE	M5	OMT-B1KR	MM	Stigmatella aurantiaca Sg a15	Myxococcota	WLILGDRGGVGETLMRRLEERGEKCTFALAGNSFQRVSERRYEIRPGQTEDFQRLVQEVFRSDSLPCKGVVHLWSLDGVSTQELTLDAIHAAQPLGVESALSVVQSIAWAGLRDAPRLWLVTAGAHVAGGETGPVAVAVAPLWGLGGTIVQEHPELRCSRVDLSGARRKEEIDALIETLWADGSEDQIALRGGERFVARL
BGC0000153.1	stiF	M6	ER	M	Stigmatella aurantiaca Sg a15	Myxococcota	WVVFADRSGVAEALIDRLTARGEPVVRVLADDHYSREGDLVRLHPEQPEHVRSLMESAASSGGAVTRYLYLWGLDSSGPVSRGEASRVDTRAIGSNPLLHLVQELAGQQGSHQLFLVTRGAQATTREHAPIDAFQASLWGFARTIAFEHPELRPVRIDLEPSRKGGSPRETEILLGEVTRSDAASAEDAIAFRGSLRLVSRL
BGC0000157.1	tmcA	M1	0DH-B1KR	MM	Streptomyces sp. CK4412	Actinomycetes	DWTAVGPHGFTRRSGTPQAVVLSVSGDGEPVPTAVHELTGWVLEQLQHQLNEGTTPLVVVTQGAVAPVVTDVAAAAVWGLVRSAQSENPGRIVLLDTDAEVDGALLGRVLAAGEPQLVLRDGTWRAARL
BGC0000157.1	tmcA	M2	AKR	M	Streptomyces sp. CK4412	Actinomycetes	WAVVVPAGRSDDVLVDAVTGALGTDVTVVEHGDIPGLRAVDGIVSLEVLLQDSTQAGLTAVIDLLQTLPDQGIPLWVLTRGAVSTGAHDPVTDPDQAAVWGLGRVAALEQPACWGGLIDLPAVLDARAARELAVVLSNGSSEDQVAVRPAGVFGRRL
BGC0000157.1	tmcA	M3	0DH-C1KR	MM	Streptomyces sp. CK4412	Actinomycetes	ARAAVVVPVSGDSGAVLTSAHELTARVVRKLDETTGPLVVVTRGAVAVEPGEPVTDLAAAAVWGVVRGMQTADPGRIVLLDTDTEVDGAVLSQVLGADEPQLALRGGALRAARL
BGC0000157.1	tmcA	M4	0DH-BKR	M	Streptomyces sp. CK4412	Actinomycetes	KWVTADSTDQESAQVAVLSASAAPDDVAASTHELVGRVLEQLQSWLTEATIPLVVLTRGAVAADPGEPVTDLAAAAVWGLVRSAQTENPGRIVLLDMDADTNANADTGRDMGVDAALLGHVLASGEPQLALRNGTLRAARL
BGC0000157.1	tmcA	M5	ER	MM	Streptomyces sp. CK4412	Actinomycetes	WLLVDRNGTGHTTVETLDTVDSSPVVLAVAAGPGPVVDTTHELTGWVLEQLQHWLRKESVAPLVVWTRGAVAAHPGESVGDLPAAAAWGLVRSAQSENPGRIVLLDTDAALDAAVLGRALATDEPQLALRGGQFQAARL
BGC0000157.1	tmcB	M6	ER	MM	Streptomyces sp. CK4412	Actinomycetes	DAADAVLLAAEGDPNEVVRSTHDLTARVLGQLQQHLGTDERPVVVTTRGAIAADSGESVTDIAAAAVWGLVRSAQSEHPGRIVLLDSDTEVDAAVLGRVLTADEPQLVLRNGKLLAARL
BGC0000157.1	tmcB	M7	ER	M	Streptomyces sp. CK4412	Actinomycetes	WVMVDPDAAAHAGLPEVATGTDDEAQPRAVILPVSGDPDDVVESAHDRTAWVLEQLQVRLEGTAVPLVVVTRGAVAAQPGETVTDLAAAAVWGLVRSAQTENPGRIVLLDTDAEVDAVLLGQVLAVGEPQLAWRQGRLHTARL
BGC0000157.1	tmcB	M8	EDH	MA3	Streptomyces sp. CK4412	Actinomycetes	WTVADRTAPLGDETATLPVVLVVSGDPVTVAESSHELTGWVLTQLQQWLGSESTVPLVVMTRGAVAVRTSSSAPASPEGARGEPVPDLPAAAVWGLVRSAQTENPGRIVLLDTDSDLDAATLGNVLAADEPQLVLRDGRLHAGRL
BGC0000158.1	ttnA	M1	0DH-B1KR	MM	Streptomyces griseochromogenes	Actinomycetes	DWTAVGPHGFTRRSGTPQAVVLSVSGDGEPVPTAVHELTGWVLEQLQHQLNEGTTPLVVVTQGAVAPVVTDVAAAAVWGLVRSAQSENPGRIVLLDTDAEVDGALLGRVLAAGEPQLVLRDGTWRAARL
BGC0000158.1	ttnA	M2	AKR	M	Streptomyces griseochromogenes	Actinomycetes	WAVVVPAGRSDDALVDAVTGALGTDVTVVEHGDIPELPAVDGIVSLEVLLQDSTQAGLTAVIDLLQTLPDQGIPLWVLTRGAVSTGAHDPVTDPDQAAVWGLGRVAALEQPACWGGLIDLPAVLDARAARELAVVLSNGSSEDQVAVRPAGVFGRRL
BGC0000158.1	ttnA	M3	0DH-C1KR	MM	Streptomyces griseochromogenes	Actinomycetes	ARAAVVVPVSGDSGAVLTSAHELTARVVRKLHETTGPLVVVTRGAVAVEPGEPVTDLAAAAVWGVVRGMQTADPGRIVLLDTDTDVDGAVLSQVLGADEPQLALRGGALRAARL
BGC0000158.1	ttnA	M4	0DH-BKR	M	Streptomyces griseochromogenes	Actinomycetes	KWVTADSTDQESAQVAVLSASAAPDDVAASTHELVGRVLEQLQSWLTEATIPLVVLTRGAVAADPGEPVTDLAAAAVWGLVRSAQTENPGRIVLLDMDADTNANADTGRDTGVDAALLGHVLASGEPQLALRNGTLRAARL
BGC0000158.1	ttnA	M5	ER	MM	Streptomyces griseochromogenes	Actinomycetes	WLLVDRNGTGHTTVETLDTVDSSPVVLAVAAGPGPVVDTTHELTGWVLEQLQHWLRKESVAPLVVWTRGAVAAHPGESVGDLPAAAAWGLVRSAQSENPGRIVLLDTDAALDAAVLGRALATDEPQLALRGGQFQAARL
BGC0000158.1	ttnB	M6	ER	MM	Streptomyces griseochromogenes	Actinomycetes	DAADAVLLAAEGDPNEVVRSTHDLTARVLGQLQQHLGTDERPVVVTTRGAIAADSGESVTDIAAAAVWGLVRSAQSEHPGRIVLLDSDTEVDAAVLGRVLTADEPQLVLRNGKLLAARL
BGC0000158.1	ttnB	M7	ER	M	Streptomyces griseochromogenes	Actinomycetes	WVMVDPDAAAHAGLPEVATGTDDEAQPRAVILPVSGDPDDVVESAHDRTAWVLEQLQVRLEGTAVPLVVVTRGAVAAQPGETVTDLAAAAVWGLVRSAQTENPGRIVLLDTDAEVDAVLLGQVLAVGEPQLAWRQGRLHTARL
BGC0000158.1	ttnB	M8	EDH	MA3	Streptomyces griseochromogenes	Actinomycetes	WTVADRTAPLGDETATLPVVLAVSGDPVTVAESSHELTGWVLTQLQQWLGSESTVPLVVMTRGAVAVRTSSSAPASPEGARGEPVPDLPAAAVWGLVRSAQTENPGRIVLLDTDSDLDAATLGNVLAADEPQLVLRDGRLHAGRL
BGC0000159.1	ttmJ	M1	0DH-B1KR	MA21	Streptomyces spiroverticillatus	Actinomycetes	RLVVDRPGSIADAVAAGPLPPVVVLPVSGDPDAVVESVHDVTGWVLEQVQHWLSDERFAATPLVVATTGAIAVRPGDTVTDPAAAAVWGLVRSAQTENPGRFVLVDTDAELDTAVLGRILAADEPQLALRAGRLHAARL
BGC0000159.1	ttmH	M10	0DH-BKR	M	Streptomyces spiroverticillatus	Actinomycetes	WLLAGPDDARFADLTAPGEERPVPQAVVLAVSGAADAVVESTHELTGRVLRLLQHWLADGRFSAVPLVVLTSGAVAAGPDEGVRDLAAAAVWGLVRSAQTENPGRFVLLDSDAEPDTTTVSRVLASGEPQVVIREGRMHAARL
BGC0000159.1	ttmH	M11	ER	MM	Streptomyces spiroverticillatus	Actinomycetes	WLLVDRASSTGTAYADLAEVSAATADGARPQAVVLAVAGDRDAVVDSVHELTAWVLGQLQHWLAEDRFASIPLVVAVRGAVTVEDGESVRDLAAAAVWGLVRSAQTENPGRIVLLDTDTELDHDVLGRVLSTDEPQLALRGTRLHAARL
BGC0000159.1	ttmJ	M2	AKR	M	Streptomyces spiroverticillatus	Actinomycetes	WLVVVPAGAGDDAGTREIVDALGAGTRVLEHSGPDRAALAGKLSDAAGSGVPVAGVLSPAALEPDTATGLVSATLLLRALRDTGLSARLWVVTRGAVSIGSHDPVTAPGQGAFWGFGRVAALEEPELWGGLVDLPGTLDLRTARRFAAAVSDTAGEDQIAVRSSGWYGRRL
BGC0000159.1	ttmJ	M3	0DH-C1KR	MM	Streptomyces spiroverticillatus	Actinomycetes	QWRLAAPGEPVLSALDDEPTPAAVVLPVSADPGTVADSAHQVAGRVLGRLQDWLADERSADVPLVVVTTGAVSTGQDEPVTDPAAAAVHGLVRSAQAEYPGRIVLLDADTELDAAGLGLALATGEPYLALRAGQFHAARL
BGC0000159.1	ttmJ	M4	0DH-BKR	M	Streptomyces spiroverticillatus	Actinomycetes	WTVVGSMEPVPAAEEGAVVLRASGDSASVVESTHELTAEVLRQLQQWPADPAGSPLIVWTRGAVTTAPGDPVTDLAAAAVWGLVRSAQTENPGRFVLLDTDPHTDRLDATVLGEVLAAGEPQLALRGGRLFAARL
BGC0000159.1	ttmJ	M5	ER	MM	Streptomyces spiroverticillatus	Actinomycetes	WVIVAPCGADHLDLSAVGTALDEGRPVPGAVVLAVAGGPDSVVRSTHELTGWVLRQLQYWLGEARFASIPLVVSTRGAVAVHSGEPVTDLAAAAVWGLVRSAQSENPDRIVLLDTDTDTDTDTDKDTGIGIEAGVLGAILASGEPQWAVRGGRFHTARL
BGC0000159.1	ttmJ	M6	A1KR	MM	Streptomyces spiroverticillatus	Actinomycetes	RLVVVPAGKSDDAWVSDVVAVLGADTLVLEHSDDAALSGRLRAALDADVPVTAVLSLTAALEPDTTTALASTIALLRALRDTGAPPLWVATRGAVSVGGQDPVTAPGQGAAWGLGRVAALDQPGLWGGLIDLPEILDTRSARLVTAVMSGTSGEDQVAVRASGLFGRRL
BGC0000159.1	ttmI	M7	ER	M	Streptomyces spiroverticillatus	Actinomycetes	WLVADPADVTAVAADAEPQAVVLAVSGDPEAVVASTHELTGHVLRQLQQWLSDDRFASIPLVVATSGAIAAEREPVRDLAAAAVWGLVRSAQTEHPGRFVLLDADCAVDADVLGQVLAADEPQLAVRKGQLLAARL
BGC0000159.1	ttmI	M8	CKR	M	Streptomyces spiroverticillatus	Actinomycetes	WLVVVPEGARDDAWAAEVAHALGASTLVLDHSGAELTERLKEAGESAAGVTGVVSLAAALEPGITAGLAATTSLLRAVLDSGLAARIWVVTRGAMSVGPHDPVIAPAQGGVWGLGRVAALELPALWGGLADLPEVLDPRSARWLAAALPGTTGEDQIVVRPAGVFGRRL
BGC0000159.1	ttmI	M9	ER	MM	Streptomyces spiroverticillatus	Actinomycetes	WLAVGRTGEDHTGMEAAAAALDDGLPAPDAVVLAVSGDADRVVESTHELSGWVLRQLQYWLSQDRFESIPLVVTTRGAIAAQPGETVPDLAAAAAWGLVRSAQTENPGRIVLLDTGPGSALDAGVLGRVLAADEPQLALRDGQLLAGRL
BGC0000162.1	TcaA1	M1	EDH	M	Micromonospora chalcea	Actinomycetes	WAVLGDAALGVARAGGVTAAAYPDLTALSTAVDGGDPRPDLVLVDPVADAVGEGDDGAPDASAHLFAGRVLALVQDWLADEHLTGARLVVLTRRAMDVGAADDPAPASATVWGLLRSAQTEHPDRLVLLDLDDDETSARSVAAAATSGEPQLAVRAGEVRRPRL
BGC0000162.1	TcaA4	M10	EDH	MM	Micromonospora chalcea	Actinomycetes	DVSGAATVFGDLEEVLAAEEPTDVPAVLLLRVGQGEDPDAGPEAAHAVAERTLHQLQQWLTNPHLTHTHLVILTQHAIPTTPHQPINLPTTTTWGLIRTTQTEHPNRITLIDHDHHPTTNHTITTALTTGHPQLAIRNNHLHTPQL
BGC0000162.1	TcaA5	M11	CKR	M	Micromonospora chalcea	Actinomycetes	PRALLALVPADLAGDATVTAALDALDTTTKPLLVPASTQDAGELAMLLRGRRAGVGDGVVSLLGLRRDAADTGVPAGLGLTGALPDALDQAGLDVPLWVLTCGAVETGRSDSPVVAGQAAVWGLGQALAAGHPRREIRLVDLPRVLGAPARRALAALLRGRPADTRLAVRGDGVRTPRL
BGC0000162.1	TcaA1	M2	EDH	M	Micromonospora chalcea	Actinomycetes	WRKGVVVGADPLGLCERFEGLTATDAIPDDASVDIIFLHCGYDGDDGDSLAAAHAVAERTLHQLQQWLTNPHLTHTHLVILTQHAIPTTPHQPINLPTTTTWGLIRTTQTEHPNRITLIDHDHHPTTNHTITTALTTRHPQLAIRNNHLHTPQL
BGC0000162.1	TcaA1	M3	EDH	MM	Micromonospora chalcea	Actinomycetes	AGDLAEALSLPAVAGVDELARTTGGDVPGWAVVSFGSAEGDDPVPSAHGLVERARVLVRRWLETDRLAETRLIFLTRGAVSTGQDDPVTDLPGAAVWGFVRSAQTEHPDRFVLVDHDDARPSREDLDAAATGEPQLALRDGHRLTPRL
BGC0000162.1	TcaA2	M4	0DH-CKR	M	Micromonospora chalcea	Actinomycetes	WALVGDDDALGGLPGDRHPDLAALTRAVGEEAAVSGAVVVAAPQGGPEPYPSMGGQVTALADSARRWLAEERFGASRLVVVTRGAVAATAGEDVGDLGQAALWGMLRSLQGEHPGRLALVDTEDGLTVSSLRAVLAAREDQLAVRGSTLFAARL
BGC0000162.1	TcaA2	M5	EDH	MM	Micromonospora chalcea	Actinomycetes	WAVLGDLDAGADPAFAGLPRHPELADLARELDAGAAAPGVVLLACHSGPDDAGTDPAARAHEVTRRVLGTVQGWLADPRLAGSRLIVLTRGAIAARPGDEVRDLPGSTVWGLLRAAWWEEPDRFVLADLDDAATPESLRAALATDSYQVVLREGACLVPRL
BGC0000162.1	TcaA2	M6	EDH	M	Micromonospora chalcea	Actinomycetes	LLGGSDRLRAALAGAADVHDDLPALLGTPDPLPDVVLLPVPPHDGPGPDQVRAALAEVMDTAQRWLAEDRAAGSRLVVVTEGAVSTGAEDPAPDLAGAGVWGLVRSAQAEHAGRFVLLDLDATGASADAVTAALALDEPQVAVRAGRCLLPRV
BGC0000162.1	TcaA2	M7	EDH	M	Micromonospora chalcea	Actinomycetes	DAGAPVPPVQDLGHDEPVPELVLLDCAPAGTATTGDAAADAHRATRRALDVLQRVLGDDRFARTRLGVLTRSAVAAVDGDTVTDLAGAAVGGLVRAAQTENPGRIVLLDTDGTEASTAVLRAALDAGEPWLALRDGTAYAARL
BGC0000162.1	TcaA3	M8	ER-0DH-B2KR	MM	Micromonospora chalcea	Actinomycetes	WLVLGAPPHPVEWLGGDLRVVADPESWWPAVDAGAPVPGTVVAFAPAPPADADPPSGAHATTHWVHDLVRRWLTAERLEHSRLVVVTERAVAARAGDHVTGLAAAPAWGFLRVAQLEQPDRFHLVDVDGRESSLRRLRAALASGEPQLALRDGEAYAARL
BGC0000162.1	TcaA3	M9	EDH	MM	Micromonospora chalcea	Actinomycetes	LVFVGATAVDQVSAPRHATLDDLRAALAGGAPVPSVVVVSVPDGAGADPAAQAHLATHRTLHTVQEWLADDTFAGSSLALVTRGATGITEQEPVPDLAAAAVWGLVRSAQAENPGRFQLVDVDATATEQAVAAVIASGEPQSAVRDGRAYVPRL
BGC0000163.1	tsnAI	M1	ZDH	M	Streptomyces longisporoflavus	Actinomycetes	WASVGAPTLGLPNEWALYGNMTELGAAVAEGATVPDFVSLTVPSEAADDLADTANRTTQHVLRELQVFAADARLADAMLVVVTRGAVAAGEGELPGLSAAPVWGLVRSAQAENPGRYLLVDLDPAAAEGLPPHHLTAAVQSAVAADERQIALRGETVLVPRL
BGC0000163.1	tsnAIV	M10	ER	MM	Streptomyces longisporoflavus	Actinomycetes	EAVANGVAKDAEPQPYALLLAGVDEAPQEAEVHARLGDFAELPLPERVQAASEQALALLQEWLTDDARTNSHLVVLTRHAVAAQPGEHLTDLTHAPLWGLIRSAQSEHPRRITLIDTDNHPDSTNHLTQAIHTATTTDEPQVALRNGNILTPRL
BGC0000163.1	tsnAIV	M11	EDH	MM	Streptomyces longisporoflavus	Actinomycetes	GGTDAVDHQAWTILTAGTPATALPESITHLELDSADPDLPLPEQVHHTAAQTLQHLQDWLTDPANTDRHLIVLTHHAVTTHPGENITDLTHAPLWGLIRSAQNEHPHRITLIDTDEHPDSNKHLPGAVHAAITAGEPQLALRNGDTLVPRL
BGC0000163.1	tsnAV	M12	CKR	M	Streptomyces longisporoflavus	Actinomycetes	WLAVLPPALATADAADVLTGITGALTAHGHRVVAFVADPDGEPSPAELLRAQLAAGAPDGTPFTGVLSLLALDERPHHDHPAVSVGTALTAALVQGVAAAARPVPVWGLTRGAVAVEASDGTRPEQAPVWAVLQAAAAELPTWSGGLIDLPGTLDDDAGRRLAAFLRGSAEQQVALRPAGLLARRL
BGC0000163.1	tsnAI	M2	ER	MM	Streptomyces longisporoflavus	Actinomycetes	CAVLGDDSWGLTAALEGMGVPVVSVSGDGAGDGPEFVLLPVGAPAGGTAEGVPAAVRQATGEVLAELQRWLSEEQDQAQQRAAGARLVVVTHDAVTTGTGEESVDLSAAAVWGLVRSAVTENPDRFLLADLDRHEESLSALVPALRAAVRHGEPQFAVRKGSALVPRL
BGC0000163.1	tsnAII	M3	0DH-B1KR	MM	Streptomyces longisporoflavus	Actinomycetes	WTILTAGTPATALPESITHLELDSADPDLPLPEQVHHAAAQTLQHLQDWLTDPANTDRHLIVLTHHAVTTHPGENITDLAHAPLWGLIRSAQNEHPHRITLIDTDNHPNSQQQLTHAIATGEPQLALRNGDTLVPRL
BGC0000163.1	tsnAII	M4	EDH	M	Streptomyces longisporoflavus	Actinomycetes	TTETVVSDLRIFAAGPDTGEFNAVGSNTSVFAALPPLDLELPLPERVFTATAHTLHVVRDWLSDDSASGAPLVVVTRGAVSVAPENDIDLVHAPLWGLLRSAQSEHPHRFLLVDVDDDPASLAALPSAVTTAVARQEPQLALRAGAPLVPRL
BGC0000163.1	tsnAII	M5	BKR	M	Streptomyces longisporoflavus	Actinomycetes	WLVVSAEEAGEAGEHGESGSSADWTAWCTAALRRAGAEVVELKTDGPSVDRADFVKALGNLPGDEHPPAGVLSLLALTSTDATGYVPLSATAALIQALGDAGWQAPMWSLTSGAVSTGVSAPVTHPAQAHVWGLGRVAAAEHPNRWGGLVDVVGKLDERSGGLLAATLAGNGGEDQVAIRPGGVFGCRL
BGC0000163.1	tsnAIII	M6	ER	MM	Streptomyces longisporoflavus	Actinomycetes	PPAAAQDWSVVPVGVPLESLGDLPVHAAFEPVDSELSLPEQVRAASEQALALLQRWLADPDNTRRHLVVLTHGAVTAQPGERLTDLVHAPLWGLFRSAQSEHPLRITLIDTDNHPDSTDHLTHAVQTATTTDEPQLALREGNILTPRL
BGC0000163.1	tsnAIII	M7	EDH	MM	Streptomyces longisporoflavus	Actinomycetes	GGTDAGDHQAWTILTAGTPATALPESITHLELDPADPDLPLPEQVRHTAARTLRHLQDWLTDPANTDRHLIVLTHHAVTTHPGENITDLTHAPLWGLIRSAQNEHPHRITLIDTDNHPNSTNHLPGAVHAVITAGEPQLALRNGETLVPRL
BGC0000163.1	tsnAIII	M8	EDH	M	Streptomyces longisporoflavus	Actinomycetes	SATPEPVPHDLILAGITPDGLTSTTDTCTQLDHHTDLPLPEQVRHAAAQTLQHLQDWLTDPANTDRHLIVLTHGAVTTHPGENITDLTHAPLWGLIRSAQNEHPHRITLIDTDNHPNSQQQLTHAIATGEPQLALRNGDMIVPRL
BGC0000163.1	tsnAIV	M9	ER	M	Streptomyces longisporoflavus	Actinomycetes	YAVLAPLADGSSSDDNSTNNAAEFAASLAAAVGCEGTTDLDRLAEGDEVPATVFLPVVDRGMHADDEPVPARVRQLGTRLLALVQRWLRDESLAAVRLVVVTSGAVAAEPGDPVSDVVSASVWGLLRSAQSEHPDRFLLVDVDGGPESAAALPAVVLSGEPQVAVREGRPLAARL
BGC0000163.1	tsnDIII		ER		Streptomyces longisporoflavus	Actinomycetes	VLLVGAGRESLDELAGAAAGQNTELTVAADAAQALALLADRPTDVCWFWRGTGSVPDGGDQDAAGLRAECERNYRDLLALRDGLDAARFGGGQRLWLITEGGQWVPGDSAWDTGTPPAAATLWGFGQVMWTEYPAYRVTLVDLPGGGRDLSPLLAEWSAPDSAEYQIAYRSGLRHVRRV
BGC0000164.1	tmnA1	M1	EDH	M	Streptomyces sp. NRRL 11266	Actinomycetes	WAALGATAPVPDTPARHYASLADILATDDQPTAVVYVPAPGGTTPTAAHTAVNDLLTLLQQHLAEPRLADTPLVVLTRHAHTAEPDPVHAALWGLARTAQTEQPGRIHLLDTDDHPDTRTHLPRALAEALKTPQLALHVGTPHTPHL
BGC0000164.1	tmnAV	M10	ER	MM	Streptomyces sp. NRRL 11266	Actinomycetes	LDRYDVHVAAPAAEDTPAAAHAATEALLVHVQNWLAANDQTDRLLAVVTHRAVATHPAEDVHLAHAPLWGLLRSAQSENPDRIHLVDTDATGIAPDADAADIPYLADALATGEPQVAVRGGQVLAARL
BGC0000164.1	tmnAV	M11	EDH	MM	Streptomyces sp. NRRL 11266	Actinomycetes	DLDQVDVYAAAPAEDDSPAAAHTATEALLTHLQSWLAENDETDRRLVVLTHRAVATDAAEDVHLAHAPLWGLVRTAQNEQPDRIHLIDTDTDDTPDLTAALATGEPQLALRNGDILIPRL
BGC0000164.1	tmnAVI	M12	CKR	M	Streptomyces sp. NRRL 11266	Actinomycetes	WVVLLPEDAAEHPAVRTALTALDEGGAGVEVVTVERQMARTTFAGRLRAALSACGARLAGVLSLLAFADPARPGPDGLELSATLLHALDDAAAQVPVWFLTAGGTTAGGEDPLADPAQARIRGLAQSLAVEHPERWGGLADLPAGGAGGRDVRDRLRAALAGRADRSGAREDQVAVRAGALFARRM
BGC0000164.1	tmnA1	M2	ER	M	Streptomyces sp. NRRL 11266	Actinomycetes	WAVLGTAALQDTPARHYASLADLLATDDQPTAVVYTPAPGGTTPTAAHTAVNDLLTLLQQHLTEPRLADTPLVVLTRHAHALPTDADPATDPAHTALWGLARSAQAEHPGRIHLLDTDDHP
BGC0000164.1	tmnAII	M3	AKR	M	Streptomyces sp. NRRL 11266	Actinomycetes	WLLVTRDGADGRPAAWAGAADTALRARGARVTVVALDERAADDRADVTRRVSAALAGEAVDGVLSLLALDERAHPGHPALPSGVAGLLGLVQALVELDVAAPVWSLTCAAVSALDDEVPAYPLQAQTWGLGRVVALEQPQLWGGLVDLPERPGDEDWQRLCAVLAGAAGDEDQVAVRPGGLRVRRL
BGC0000164.1	tmnAIII	M4	EDH	M	Streptomyces sp. NRRL 11266	Actinomycetes	AELRETDLDAFAGVLDAAGAGSEGSGVYVVRCPDADGGDADGTAERARTTVARVLTAVQRWLSDDRFADSRLAVVTRGAVGADADGDVPALESAPVWGLLRSAQSEHPDRIVLVDDDPGQGSSLDAADAVRAALAAGEPQVAIRGGGLLAPRL
BGC0000164.1	tmnAIII	M5	AKR	M	Streptomyces sp. NRRL 11266	Actinomycetes	WLLAVPDSGRAGEWPEFCAGALQGAGAQVTTVEVAAGTERAALAEQLARRIEETGQPRGILSLLAVRAEPADTAAEAAYAADADPAFDGVPEELTATVVLTQALGDTGVTAPLWAATREAVSVGDEDPLRNPEAALMWGFGRAAALEEPARWGGLVDLPGTPADLGARGRAELAALLGGSPDGSGAPVEDQIALRADGPRARRL
BGC0000164.1	tmnAIV	M6	ER	MM	Streptomyces sp. NRRL 11266	Actinomycetes	IDPDLVDLYVAPRPAEDTPAAAHAATEALLTHLQGWLADNDETDRRLVVLTHRAVATGPAEDVHLAHAPLWGLVRTAQNEQPDRIHLIDTDTEVDAAAVTDVPQLADALAEGEPQLALRHGQFLVARL
BGC0000164.1	tmnAIV	M7	EDH	MM	Streptomyces sp. NRRL 11266	Actinomycetes	DLDQVDVYVAVPAAEDTPAAAHVATEALLTHVQNWLADNDQSDRQLVVLTHRAVATDAAEDVHLAHAPLWGLVRTAQNEQPDRIRLIDTDAAGIRGNAADIPQLAEALATGEPQLALRDGRVLTPRL
BGC0000164.1	tmnAIV	M8	EDH	M	Streptomyces sp. NRRL 11266	Actinomycetes	DLDRVDVYAAAPAEDDSPAAAHTATEALLTHLQSWLAKNDATDRQLVVLTHRAVATGPAEDVHLAHAPLWGLVRTAQNENPDRIHLIDTDTDNTPDLTAALATGEPQLALRNGDILIPRL
BGC0000164.1	tmnAV	M9	ER	M	Streptomyces sp. NRRL 11266	Actinomycetes	VAPELVDLYVAAPAEEDGPVAAHAAAEALLAHVQGWLAANDRTDRRLAVLTHRAVATNPADDLHLPHAPLWGMVRTAQNENPDRIHLVDTDTATDAVTGGDPAAVPHLLDALATGEPQLAVRHDQVLAPRL
BGC0000165.1	tiaA1	M1	BKR	M	Dactylosporangium aurantiacum subsp. hamdenensis	Actinomycetes	WLVVVGNRDSDGWADAAATALTAAGADVTTLVLDPATPLDPIVDGYDGILSLLGDDGLAGVLRLLQATPDTGPHCPVWAATTGAGDHPAAAATWGFGRVAALEHPTRWGGLIDLPAAGRVAAERLVDVLLSGSGEDQVAIRTAGILVRRL
BGC0000165.1	tiaA1	M2	EDH	MM	Dactylosporangium aurantiacum subsp. hamdenensis	Actinomycetes	VGEEEVDLPVWDCAGVGLADVLAGVQQRLAADEQRWVVLVPDSQADPDAAAVWGLLASAQSEHPDRFVLVDAADAETAQAAVAVCEEPQLRVDGDGGVRVPRL
BGC0000165.1	tiaA1	M3	EDH	MM	Dactylosporangium aurantiacum subsp. hamdenensis	Actinomycetes	IGEAQADIAVWDPSDAVLADTLAGVQQRLAADDQRWLVLVPGSQDRPERAAVWGLLASAQSEHPDRFVLVDAADAGTARAAVAVCDEPQLRVDGDGRVQVPRL
BGC0000165.1	tiaA2	M4	A1KR	MA3	Dactylosporangium aurantiacum subsp. hamdenensis	Actinomycetes	WLLIAPGDDRHGWTPVVSAALTRAGAEVVTVASAGDPIGELDFDGALSLLGLDESAHPAAAVVPRGLAATLDLLRTLHAAPRPVPLWTITCGAVAAGDTEHVTRPTQAMLWGLGRVAALETPRSWGGLIDLPDAPDANAAGRLTDVLAGGTDDDQLAIRAGGVLARRL
BGC0000165.1	tiaA2	M5	EDH	MM	Dactylosporangium aurantiacum subsp. hamdenensis	Actinomycetes	VSEAQDDRPVWDCTDVALREVLTGVQQRLAADEQRWLVLVPDSQDRPERAAAWGLLASAQSEHPDRFVLVDAADAGTARAAVAVCDEPQLRVDGDGRVQVPRL
BGC0000165.1	tiaA3	M6	BKR	M	Dactylosporangium aurantiacum subsp. hamdenensis	Actinomycetes	WLLLTPAEDVDAGWAAAIRDGVEAAGGRCTILNAAGQDRATLHDSRADRVISLLGLDGTPSPDAPAVPAGLAATLHLLQVLDDAGMATPLWCLTRDAVAAGPVHAPAQAAMWGLGRTAALEHPQLWGGLVDVSGHPDAEAVERVLATVAAAVEDQVAVRPGRTLVRRL
BGC0000165.1	tiaA4	M7	EDH	M	Dactylosporangium aurantiacum subsp. hamdenensis	Actinomycetes	AGEAEVDLPVWDCAGVGLADVLAGVQQRLAADERRWVVLVPDSQDRPERAAVWGLLASAQSEHPGRFVLVDAVDVGVARAAVAVCDEPQLRVDGDGGVRVPRL
BGC0000165.1	tiaA4	M8	EDH	MM	Dactylosporangium aurantiacum subsp. hamdenensis	Actinomycetes	LGQAEADLPVWDCTGVGLPDALAGVQQRLAAAERRWLVLIPGGHSVPDAAAVWGLLASAQSEHPDRFVLVDAADPAAARAAAVVCDEPQLRVGQDGRVWVPRL
BGC0000166	tylG1	M1	DHT-B1KR	MM	Streptomyces fradiae	Actinomycetes	CLLVAPPTTDGELLDGLTTVLSERGASVARLEVPIGARRAEVAELLKPSMESAGEENTTVVSLLGLVPSTDAVRTSIALLQAVSDIGVPAARVWALTRRAVAVVPGETPQDAGAQLWGFGRVAALELPDIWGGLIDLPETAELTRTPETSQPPQTPERLPQTPNRRALELAAAVLAGRDGEDQVAVRASGIYGRRV
BGC0000166	tylG1	M2	EDH	MM	Streptomyces fradiae	Actinomycetes	WAVLGPDADRLAGTPGLGDQPDGGPTALYPEVRALRKALAAGAPRPEAVVLPVLSGAGATPESVRQTTERCLTALQDWLDAEELVDTPLIVLTRGAVAAVPGEEIGDLACAGVWGLVRSARSEHPGRFALVDTDGHPDDRTALPLALRAVLDGAGQLSLRAGTARTPVL
BGC0000166	tylG2	M3	EDH	M	Streptomyces fradiae	Actinomycetes	WAVAGGPGDLLPGETPHHPDLASALADTGTAPFRVLADLRGYGTATPRELASQALALVQQWADAAEAAEGRLVLVTRRAVDIGDGVTDPAAATVWGLVRAAQSEHPGCFALLDTDDSPRSRQLLPRVAGTAEQLALRDGTLLAPSL
BGC0000166	tylG3	M4	C2KR	MM	Streptomyces fradiae	Actinomycetes	WLLVVPEASADPSVAEGVARELTARGATVESLTVEPGADRSRLRGLLVDATERDEAGPLRGIVSLLALAGDHAGADGARPVVPAGLAASLALIQAAGDAGTEAGLWAVTRGAVAAVPGDVPAPSQALLWGFGRVAGIELPHCWGGLLDLPTGPGDSGFRQLAATLAGRPAEDQVALRASGAYGRRL
BGC0000166	tylG3	M5	ER	MA3	Streptomyces fradiae	Actinomycetes	WALLGEDHAGLADVLGGTGGGCERYDTLTGLLEATTRSAGGILPDIVALSLPTAPEPGPQAVREVLSQALDAAQAWLAAGAETASARLVFVTGGAVATTADETVRDIAAAAVWGLVRSAQSEEPDRMVLLDLDGERPTARTLAAALASGEPQLAVRGSTVAAPRL
BGC0000166	tylG4	M6	A1KR	MM	Streptomyces fradiae	Actinomycetes	WLLVTPPTPEGRTLGDRAAGALARQGATVERLVVDPVAVGRDGLAARLGERWDGVLSLLGADERPLPRHPALNRAVMGTTLLAQAALDAGCEARIWAVTREAVAVSPSEVPRDAGAQLWGLGRGIALEHPSLWGGLIDLPAVPDERAWARAVRRLVPHGEDQIAARASGAYGRRL
BGC0000166	tylG5	M7	AKR	M	Streptomyces fradiae	Actinomycetes	WLVIHPDSPRCRELSGHAERALRAAGASPVPLPVDAPAADRASFAALLRSATGPDTRGDTAAPVAGVLSLLSEEDRPHRQHAPVPAGVLATLSLMQAMEEEAVEARVWCVSRAAVAAADRERPVGAGAALWGLGRVAALERPTRWGGLVDLPASPGAAHWAAAVERLAGPEDQIAVRASGSWGRRL
BGC0000167.1	vinP1	M1	ER	M	Streptomyces halstedii	Actinomycetes	WAVLGAGAPELAAALTAAGTPGTAYHGTAELSAAVDGGTTPDVVAVQLPSAGAADADLPDAVRATLNTALEFVQNWLADERLAETRLVVVTRDAVTVDTAAGGPDLTVAPVWGLIRSAQAENPGRILLADIDGTDQSRTALAAITAADEPELAFRNGNAYAPRL
BGC0000167.1	vinP1	M2	EDH	M	Streptomyces halstedii	Actinomycetes	WALLGEPVAELGDLAGFGRTTAYASLADLAAADADTVPDLVVLPLGSRMAEGSDVPEAVRENLGQVLATIQQWNDDSRFDGSRLVVLTHGAVSVSDDESLTALDLAPVWGLVRSAMAETPGRFLLVDTDGTDPSTDALRHLAELQEAEFALREGEIRVPRL
BGC0000167.1	vinP1	M3	EDH	MM	Streptomyces halstedii	Actinomycetes	CVVVGAGSVLSGFGEVVPDLAAVSAGSADGVGVPGWVLVDVDAWLGADLAVGVVSGEGVPVVARGVVARVLGLVREWLGDERWVSSRLVWVTRGAVGARVLDEVSGVVSSGLWGLVRAAQSEHPDRFALLDLDSATAVDAVRDGVLGLLAAGEPQLVVREGEVLAARL
BGC0000167.1	vinP2	M4	ER	MM	Streptomyces halstedii	Actinomycetes	CVVVGAGSVLSGFGEVVPDLAAVSAGSAAVPGWVLVDVDAWLGADLAVGVVSGEGVPVVARGVVARVLGLVREWLGDERWVSSRLVWVTRGAVGARVLDEVSGVVSSGLWGLVRAAQSEHPDRFALLDLDSATAVDAVRDGVLGLLAAGEPQLVVREGEVLAARL
BGC0000167.1	vinP3	M6	A1KR	MM	Streptomyces halstedii	Actinomycetes	WTVLVPATHQGDATVTGVLDGLRRGGADIRVLEVTATDREALAEQLRAELAQSEPRLILSLLALDDRAHPRHPELTEGITATIALVQALDDCGATARLWCATSLAVAVTESAEVLNPVQTTAWGMGASFALDHPETWGGLVDLPADIDTRTADILCSVLASDLQEDQIALRTAGLFARRM
BGC0000167.1	vinP4	M7	EDH	M	Streptomyces halstedii	Actinomycetes	VRGVDVSGVVVLEAGVGVGGDGVSVVGGVLEGLQGVLGGGSGSRVVVVTRGAVGSGGVVDVSGAGVWGLVRSVQAEHPGRLVLVDVGVEGDVGVGVGLALGSGEEQVVVRGGEVFVPRL
BGC0000167.1	vinP4	M8	EDH	M	Streptomyces halstedii	Actinomycetes	WALLGGDPYGLAPARAVPYGDLDALAAEAEGGTPPEVVLLPLTVPAGEEPDAGERAAHRALRAVRSWLADDRFAAATLVLMTRGALAATPGDEVTDVAGAEVWGLVRSAQTEHPGRFVLVDSDGSEASARALPAAVASGEPQLALRAGTVNAARL
BGC0000353.1	fkbB	M1	EDH	MM	Streptomyces sp. MA6548	Actinomycetes	AEAHYDGADELPEGYTLITATHPDDPDDDPTNPHNTPTRTHTQTTRVLTALQHHLTTTNHTLIVHTTTDPPGAAVTGLTRTAQNEHPGRIHLIETHHPHTPLPLTQLTTLHQPHLRLTNNTLHTPHL
BGC0000353.1	fkbB	M2	0DH-B2KR	MM	Streptomyces sp. MA6548	Actinomycetes	WTHLADVPEGDVLEGDAGEGDVGESDPPPVVVLAVEPGDPDSSPGVRARELGRDLLATVRTWLAAPRWAESRIVVVTRTGDPAQEALGGLVRTAGTEHPGRVGRIEADEITPATVEAGLAAGDESHVRVTDGTVRAARL
BGC0000353.1	fkbB	M3	0DH-BKR	M	Streptomyces sp. MA6548	Actinomycetes	GLDDPVVPDVVILPAHGTGGGPLGETRDLGARVLAALRSFLTDDRYADAVLAVHTGPGLAPAAAAGLVRTAQAEHPRRIVVVDAEPDTAAPLLAAAAGLGEPQVVLREGRAYARRL
BGC0000380.1	leuA	M3	EDH	MA20	Sorangium cellulosum	Myxococcota	WLIFTDESGIGVELRALLLERGQTSALVRRGQGYRRLGGGEFEIDPLEPAAFQRLLGEPEWSRGAPPRVVHLWSSELVGALDLSADDLRAALEVGCAGVLHTAQAILKSGAPGAKPEVWIVTRGALRVGDGDGGDLSGLPQAPVWGLGRVLALEHPELTFARADLDPRARPGAAARQLLDEMLADTTEDQIALRGASRYVARL
BGC0000380.1	leuB	M4	CMT-EDH	M	Sorangium cellulosum	Myxococcota	WLLLADATDVGDVGEQLGAMLARHGQRPVVVTRGAEGAAIHGGAPELAGLRFDPGSADGFRSLLRALDQHGLRPDGVVHLWSLDAVKGDDFDTSELRYASRHGCQSALFLLQALVEAYGERPPGLWLVTGGSQAAREGDTVDGVAHAGVWGLGRVIAREHPELSCRRIDLDARPGEADIRALFDEIQLRSQEDEVALRGGERYVPRV
BGC0000380.1	leuC	M5	EDH	M	Sorangium cellulosum	Myxococcota	WLLLADRSEVVAALAESLRARGDRCVLVHAGSAYEAVSPVKFVIDPRAPEHYGRLLSDLGPRSITGVVHLFGLDQSGAEKLDAAGMSAAWKRSCGSLLHLVQGLAKASQQRSMVLCFVTRGAVAASDGEPLPGIAQAPSWGLGRVIGSEHPELRTLGVDLPPEPMKGEIDALLKELRGRAAGGAEDQVALRPEGRLVPRL
BGC0000380.1	leuD	M6	CMT-EDH	M	Sorangium cellulosum	Myxococcota	WLIFCDSAGVGDALADQLAREGTPCSRVRRAPEPGGFRCVDRGRYEIDAREPAHFARLLADAASSGGEISDVVHAWSLDVPRAPDLEPAALERASDLTAGVALHLVQAIARRGAASAPRVSFITQGAVAASPRDAVSGVGQAPLWGLGAVLEQEHPELSSALIDIDDRGRDAAAEQILRALRGDARESRIALRDGQRIVPRL
BGC0000954.1	ajuF	M10	BKR	M	Chondromyces crocatus	Myxococcota	WLVLSDREGVGAALSARLVAGGDEVFIAIPGDHFTREGPHFTLPPGDPQAFAQLLAEAQAGGDPPLTGIVHLWSLDTSATSLEALWHAQELGCASAVLTVQALLRSAPGMALGTLGAPPSKETEAGAPPRLWLVTRGAQAATKEGGSDHALAIAQAPLWGLGRGLLVEHAEIFGGLVDLDPNTPPEDVELLTLEILAPDREQQLALRAGMRRALRL
BGC0000954.1	ajuL	M3	BKR	M	Chondromyces crocatus	Myxococcota	WLLLADEGGVGEALATRLRARGSHVVIARRGAQCSEESPGLWTVAPDRPEDLVELLTRAFPAGSGGPGAVVYLWTLDAPALSGPDATPEAAEPLTCGSLLLLTQTLARHDLGPRLWLVTRGAQPVEAGAPVAAQQAPALGIGWTLALEHRTLWGGAIDLDPRAPDGEIEALCDALCAPGGEDRIALRSTPDRGLRRW
BGC0000954.1	ajuA	M4	ER	M	Chondromyces crocatus	Myxococcota	FVILADRVGIGAQLGALLEQRGASMVLVSADDDVTDAARLDALLADTMQSGAALAGVVSLRALDAPPADQLDAAALEAAGALSLGGALHVAQALARAESRARLVLVTRGAQPVAPGRVEVAQAPLWGLGAVIALEHPEWRSTLIDLDPTASVAASAETLLEEILGSDGEDRLAFRGGARHVARL
BGC0000954.1	ajuB	M5	BKR	M	Chondromyces crocatus	Myxococcota	WLIFADQGGLGEALAEQLSAGGASCTLAFAGREVDVASSETIARDVEALAGEALAGVVYAWGLDSPSPDESTVPALAEKAVLTALSVLQAIARRDGAVAPPRLWMVTRGAQATGGASPAVAQAPLWGLGRVFAVEHPDRWGGLVDLDLERPDHEVAPLADQAAMVANELGRDAGAEVAHRGGRRLIARL
BGC0000954.1	ajuC	M7	ER	MM	Chondromyces crocatus	Myxococcota	WLVFDEGQGIGCALTARLEERHERVVTVTPGTTGEGLAREAEDRYRLDPAFSQGFRNLLAEAFQGMSPAGVLFAWSLGAPPSDDTGLTWLHRAEELGPVSALHLVQGIAEAGWSVAPRLWLVTRGAVPIGDGRVVPAMATMWGLARTLAYEHPELRCTAIDLDSTGGAQEIPTLLAEFEAADPEDQVALRGGERFVARL
BGC0000954.1	ajuE	M9	ER	MM	Chondromyces crocatus	Myxococcota	WLVLADAGGVGERLAASLGEGVVLVAVGREGGNEGIERLGPGRYRVDPARPEAMRRLFDEAFGQAPPVGVAYLWALDAPQPDGSGGLTALHRAETLGPVGVLHVVQACVQAGLRHAPRLWLVTRGAQAVGVERTPPSLAQSTLWGMARTIGLEHPELHCTTVDLDPSGSAAGVVALLEELRADTGEPHVALRDGARYVARL
BGC0000969.1	cmdA	M1	0DH-B2KR	MM	Chondromyces crocatus	Myxococcota	WLVLGGPHGTGAALAMALRARGEPCVEVDGADPGKLAAHLPRACRGVIHCGGLEATSWAETTPATLEADLRRGPFAAVHLVQAILRRAFRDPPPLFLVTRGSRSAGPGGVSAVQGTLWGLGGVIALEHPELSCKRIDLPSIPWTGEVDSLLRELSAQDGEEQIALRPDGRFVARL
BGC0000969.1	cmdA	M2	EDH	MM	Chondromyces crocatus	Myxococcota	YLLLGHGGDLGLSLREALERAGHVVVHAVASAPGEVPRGTWPIDDTTPAGVRALLADAFGERPPTALVHLRALDEPPQRGATDDEPLDAKALGNALGMLYDSVLHTVQALTAMAYRDPPRLWLVTRGTQPVEVGLLSLDQAPLLGLGRVIAMEHPELRCTRLDLAAIHSAHDLQMLLTELLADDGEHEIAFRDARRLVARF
BGC0000969.1	cmdB	M3	ER	MM	Chondromyces crocatus	Myxococcota	YLLIGDGDGLERELASALEEAGHVVLCAAFGTSTEPGLGASSIDSASLETIRAQLSDAFGGQPPTAVVHLRTAAGRATPSTSAPLNTPGDSTTPLDGQALEADLCALYDSVLHTVQALATMAYRAPPRLWLVTRGAQPVAQRIVSLDQAPLLGLGRVIAMEHPELRCARVDLDPFSHTPQLQALLAELLADGDEHEVALRGTSRHVARF
BGC0000970.1	cndA	M1	ER	MM	Chondromyces crocatus	Myxococcota	WLLLADRGGVAEQLRHVLRARGERCVLLRSASSTDAAGPQSDALLPTSAEGYKQLFANMKQEALACRGIVSLWPLDTATPEDLSLASLDASLQRSSTRVLDMIQGISRLDWPAAPRLWFVTGDAEATGVAVAASTLTQAPLWGLVRAMAYEHPELQPTCVDVPSSTALAVVEALADELLAGEGERQIRLREGARDVARL
BGC0000970.1	cndB	M2	0DH-A2KR	MM	Chondromyces crocatus	Myxococcota	WLLFADGTGVAEALARQIEQSEGHCVQVRPGAEYETVTDSRVVIVPGRPDHVARLLDEAEARGMPYDGVIHLWSLDGTVPEPGAVGDEAVAQSLAHLERSLHLTCGSTLTLVQALTQPHRPSPPRLWLVTRNAQAFDGTSERLDVQGAALWGFGRSVGLEHPAIWGGLVDLDEGAHGESARLLMAQITHGGEEDQAAFRRGIRHVPRL
BGC0000970.1	cndE	M5	B1KR	MA21	Chondromyces crocatus	Myxococcota	VLIFADARLAPPLAARLHALDGKVTLVSPGAEYSRTESGHYTIDPRSSAQHHSLFSDLRARNALPTAIVHLWMTDPEAVSPGAAPSESALALGFYSPLFIAQALADLAPTAPVHLMLVSTHLQAVRGDEAVRPERAVLLGPCKVIPQEHRTVRCTSVDLDIDAHAAGSATTQLDQLVAELRTDVRDAIVAYRGPHRWVQTL
BGC0000974.1	croA	M1	OMT-A1KR	MM	Chondromyces crocatus	Myxococcota	WILFADQGGVGQALEALLTQSGEPCVLVTAASTYERQQADRYAIRPHHPEDLQRVIEEVLGANPSGCGGVVHLWSLDAPHPAEGGVSALGKAMELGCVSALHLVQALADKATSSRPRLFIVTRGAQPAGESTRSVAVAQAPLWGLGRTLSLELQGLWGGLMDLDPEPSPADAEHLFAELRASDEEDQVAFRQGRRWVARL
BGC0000974.1	croB	M2	OMT-B1KR	MM	Chondromyces crocatus	Myxococcota	WLVFADQQGVGEALRAEIESRGDTCVVAFLGEQLRQVSPGRYEVSPDRAALAALLAAERVDLTGVVHLWNLDLVPPAKTSLPTLHDAERLGCGSLMALVQAIAGAGMRDAPRLWIVTAGAHAVGTREGVAIAQAPAWGLGATIAHEHPELRCTRIDLDGGAGPADASTLLAALGSVDGEDQIALRSAVRYVARL
BGC0000974.1	croC	M3	EDH	M	Chondromyces crocatus	Myxococcota	WLVLADAGGVGTQLAERLRAGGAAVVVAVAESTSTQGDPQYVTVRPTEAEDLSRLWRQVRETHGAIAGVVHCMSLDADAAVEMNPGSLRRAQEFGCGLALHLSQAILRDEHPIPPRLWLVTWGAQAVGTPSYDVAVAQAPLWGLGRTIALEHPLLRCTLVDLDPETEDLSLLHRELLGNDDEAQVAFRDGGRLVPRL
BGC0000974.1	croJ	M6	EDH	M	Chondromyces crocatus	Myxococcota	WVLLADQSGTGAALAALLRDRGHDVHLAAIEAPLAEDASRARYHQIVEDALRDAPPGGVKFVHLGGLDAEDPDALDADPASSFASAQAHGCASALYLIQTLKAAASPLPSRVWFVTRGAQSIANAEPIRAPQQALLWGLARGLALEAPELWGGILDLDPARSSDEARLLFGALQSADGEDQVTLRGDARYVLRL
BGC0000975.1	crpB	M2	BKR	M	Nostoc sp. ATCC 53789	Cyanobacteriota	WLIFADTTAVGEKLVQQLQSHHCECSLVYRSDCYRKLDEGTYQLNPTEAQEFEQLIQAIGENSKLPLLHVINLWSLDIQGTQDLTTTTLKQAQLWGCGTVLQLVKVLTKTKSVAKLWLVTRGAQLVKSQTESVCVAASPLWGMGRVISLEHPQLWGGMVDLDPISPESEAYTLLQLLVNSNQLEDHLALRADNLYFARL
BGC0000975.1	crpB	M3	EDH	M	Nostoc sp. ATCC 53789	Cyanobacteriota	WLLFSPPTGIGKHLVESLEQQGWHCILVTPGENYQQLESQHYQINPNHPEEFLHLLQSSLEQQPPLRGIIHLWSLDSTIALRTGAQELQKSQELGCGSVLHLVQALVKNQDMESAPLWLVTQGSQSVGNESLPIQFQQTPLWGLGRVIAQEHRELQCRCLDLDPTMEDSQTVAALLEELLSPGDENQIAYCQGVRHVARL
BGC0000976.1	CurH	M4	ER	M	Moorea producens 3L	Cyanobacteriota	WLLFVPEGVWAEQLTSSLAQLDQQYVVVSPGDDFRYLSEYHYQVCPTQKESFQQLLQKIVEKGVTLQGVVHLWSLLSDSQQLNQAQELVCGSTLHLIQALGEVFDSQVPPLWLVTQGAQCIAAQTTIHVQQSPLWGLGRVIALEHPEFKCHRVDLDPDNASIAEGVEMLLQELLAPDAEDQVAYRQGERHVARL
BGC0000976.1	CurJ	M6	CMT-EDH	M	Moorea producens 3L	Cyanobacteriota	WLILADQQGIAQQLASQLHSEGDVCTLVFWGENYQQIAPGEFTINPDNFSEFEQLIETVNAKSPSLSGVVQCWTTEAGVINNINSEELKNLSKLGCGTTLSLVQALVKAGLSQPPQLWLVTCGAQPVPSSYPVIPGLAQSSLWGMGKVISLEHPELNCVRIDLDPHQTIKKQADVLFKEIWSKDQEDQVAWRGDGRYVARL
BGC0000976.1	CurK	M7	ER	M	Moorea producens 3L	Cyanobacteriota	WLVFAQDTQLVEALQRKSHESIRVSPGDTYKKLTQQHYQINPTSREQFQQLLAENSGITRIVYLWGVQESESKDNLEIQTVQEQSCATVLHLVQAIINSKPETIPKLWLVTRGTQRVISDSEVINPEYGSLWGLGRVIAQEHPELGCKRLDCDPNLEQTQILDSLVAELLSEDVEDQIAIRQGSRYVARL
BGC0000976.1	CurL	M8	OMT-BKR	M	Moorea producens 3L	Cyanobacteriota	WLIFADQQTQALKTVLAKQNQNCLIVTPGSSYKQLDDQHYQLNPTNAQEFQQLIKELFTTQDTLEGVVHLWNINTSTEELEAAQELGCASVLYLVQALVSNSQSSIVPLWLVTQGTQNVEENEPKLAVQQAPVWGLSRVIALEHPELKCRRVDLDQTRNSLEALEALGKELLNPDDEDQIAIRGGVRYSARL
BGC0000976.1	CurM	M9	BKR	M	Moorea producens 3L	Cyanobacteriota	WLILTDSKGLGKSLATHLQQLGNECSVVYQADNYQNYEPGIYHINPSHPQEFEQVYQTIFENGKLPLQKVIHLWSLDTASEQDLTTETLEQAQLWGCGSTLHLLQTLVKNPNSTPPKLWMITRGTQPVLSPTEKLTVATSPLWGLGRTIASEHPQLWGGLVDLDPQGSEDEVEVLLQQIIDSQKEDHLAVRNRKIYVARL
BGC0000982.1	ctaD	M3	EDH	M	Cystobacter fuscus	Myxococcota	WLVLADSTGTGDALVRSLRAKGARCVVARPGPTYVAQDEQTFTLNPERVEDFTRLLQDASAPHAPPCRGIVHLWGLEKDAPVSLASMREAQRLGCESVLHLTQALVKRGLTVFPRLWLVTRGTQRTGQESTPPSLAQATLWGLGRTLALEHPEFSPTLVDLDPSEPSTEDASLLAELHQAPRGEQLAYRQGQRHVARL
BGC0000982.1	ctaE	M4	OMT-A1KR	MM	Cystobacter fuscus	Myxococcota	WLLLSDRTGVGEALAQRLRAKGATCTLLHADEGRGLEQVAQGSWRGVVHLWSLDGGSLDEALHTGCESLSPLLQRLGQGSNPGARLWLVTRGAQAVGTGAISVTQAPLWGAGRVLALEHPEVWGGLFDLPPERDAGEVDALCAELLESDGEDQIAYRAGARHVARL
BGC0000988.1	epoB	M2	EDH	MM	Sorangium cellulosum	Myxococcota	WLLLGGGGGLGAALRAMLEAGGHAVVHAAENNTSAAGVRALLAKAFDGQAPTAVVHLGSLDGGGELDPGLGAQGALDAPRSADVSPDALDPALVRGCDSVLWTVQALAGMGFRDAPRLWLLTRGAQAVGAGDVSVTQAPLLGLGRVIAMEHADLRCARVDLDPARPEGELAALLAELLADDAEAEVALRGGERCVARI
BGC0000988.1	epoC	M3	BKR	M	Sorangium cellulosum	Myxococcota	WLVLADRGGVGEAAAAALSSQGCSCAVLHAPAEASAVAEQVTQALGGRNDWQGVLYLWGLDAVVEAGASAEEVAKVTHLAAAPVLALIQALGTGPRSPRLWIVTRGACTVGGEPDAAPCQAALWGMGRVAALEHPGSWGGLVDLDPEESPTEVEALVAELLSPDAEDQLAFRQGRRRAARL
BGC0000988.1	epoC	M5	EEDH-ER	M	Sorangium cellulosum	Myxococcota	WVVVAAPGSEMAAALATRLNRCVLAEPKGLEAALAGVSPAGVICLWEAGAHEEAPAAAQRVATEGLSVVQALRDRAVRLWWVTMGAVAVEAGERVQVATAPVWGLGRTVMQERPELSCTLVDLEPEADAARSADVLLRELGRADDETQVAFRSGKRRVARL
BGC0000988.1	epoC	M6	ER	MM	Sorangium cellulosum	Myxococcota	WVVVAAPGSEMAAALATRLNRCVLAEPKGLEAALAGVSPAGVICLWEAGAHEEAPAAAQRVATEGLSVVQALRDRAVRLWWVTMGAVAVEAGERVQVATAPVWGLGRTVMQERPELSCTLVDLEPEADAARSADVLLRELGRADDETQVAFRSGKRRVARL
BGC0000988.1	epoD	M7	A1KR	M		Myxococcota	WLLLADRGGVGEAVAAALSTRGLSCTVLHASADASTVAEQVSEAASRRNDWQGVLYLWGLDAVVDAGASADEVSEATRRATAPVLGLVRFLSAAPHPPRFWVVTRGACTVGGEPEASLCQAALWGLARVAALEHPAAWGGLVDLDPQKSPTEIEPLVAELLSPDAEDQLAFRSGRRHAARL
BGC0000988.1	epoD	M8	CCMT-0DH-CKR	M		Myxococcota	WLVLMDQGGTGAALVSLLEGRGEACVRVIAGTAYACLAPGLYQVDPAQPDGFHTLLRDAFGEDRICRAVVHMWSLDATAAGERATAESLQADQLLGSLSALSLVQALVRRRWRNMPRLWLLTRAVHAVGAEDAAASVAQAPVWGLGRTLALEHPELRCTLVDVNPAPSPEDAAALAVELGASDREDQVALRSDGRYVARL
BGC0000988.1	epoE	M9	0ER-0DH-BKR	M	Sorangium cellulosum	Myxococcota	WLLLGEGGGLGRSLCSALKAAGHVVVHAAGDDTSTAGMRALLANAFDGQAPTAVVHLSSLDGGGQLGPGLGAQGALDAPRSPDVDADALESALMRGCDSVLSLVQALVGMDLRNAPRLWLLTRGAQAAAAGDVSVVQAPLLGLGRTIALEHAELRCISVDLDPAEPEGEADALLAELLADDAEEEVALRGGDRLVARL
BGC0000994.1	fkbB	M1	EDH	MM	Streptomyces hygroscopicus subsp. ascomyceticus	Actinomycetes	AEAVYDGDLPEGHVLITAAHPDDPEDIPTRAHTRATRVLTALQHHLTTTDHTLIVHTTTDPAGATVTGLTRTAQNEHPHRIRLIETDHPHTPLPLAQLATLDHPHLRLTHHTLHRPHL
BGC0000994.1	fkbB	M2	0DH-B2KR	MM	Streptomyces hygroscopicus subsp. ascomyceticus	Actinomycetes	WTYLADVPDGEHPPVVVLAVEPGDPGTSPGARTRELGRDLLTTVQTWLAEPRWARSRLIVATRTGDPAQEALGGLVRTAETEHPGRVALIEADEITPAAIAAGLAAGDEPHVRVADGTARAARL
BGC0000994.1	fkbB	M3	0DH-BKR	M	Streptomyces hygroscopicus subsp. ascomyceticus	Actinomycetes	RLDDPTVPDVVILPAHGGGGAPLDDTRELGAGVLTAVQRFLTDDRYADAVLAVHTGPGLASAAAAGLVRTAQAEHPGRIVLVDAAPDTAEPLLAAATALDEPQVVLRDGQVYARRL
BGC0000994.1	fkbC	M5	EDH	MM	Streptomyces hygroscopicus subsp. ascomyceticus	Actinomycetes	TELPTPGPGPADAVHIVSALPEPGADVLDETYRLTEFVLGELHRVIAEDGPAETTLVVRIDAGPVGGAVAGLVRSAQAEHPGRFVLVETGTDTPIEALAAATTLAEPYVRVTDGRYEAPRF
BGC0000994.1	fkbC	M6	ER	MM	Streptomyces hygroscopicus subsp. ascomyceticus	Actinomycetes	DVPATDVDVITLPAADGDDPVAETRALTTRLLTALTGSGGDLLVHTTAGLATGAAAGLLRAAQAEQPGRFVHVETESGVTLAPEQQRIAVALGEPRLRLRGGRFEAARL
BGC0000994.1	fkbA	M7	ER	MA21	Streptomyces hygroscopicus subsp. ascomyceticus	Actinomycetes	VEVLGADPGDGDVPAATRELTARVLGALQRHLSAAEDTTLVVRTGTGPAAAAAAGLVRSAQAENPGRVVLVEASPDTSVELLAACAALDEPQLAVRDGVLFAPRL
BGC0000994.1	fkbA	M8	0DH-B1KR	MA21	Streptomyces hygroscopicus subsp. ascomyceticus	Actinomycetes	VYDGDLPEGHVLITAAHPDDPEDIPTRAHTRATRVLTALQHHLTTTDHTLIVHTTTDPAGATVTGLTRTAQNEHPHRIRLIETDHPHTPLPLAQLATLDHPHLRLTHHTLHHPHL
BGC0000994.1	fkbA	M9	ER	MM	Streptomyces hygroscopicus subsp. ascomyceticus	Actinomycetes	SDADVLTLRGDDADPLGETRDLTTRVLDALLRADRPVIFQVTGGLAAKAAAGLVRTAQNEQPGRFFLVETDPGEVLDGAKRDAIAALGEPHVRLRDGLFEAARL
BGC0000998.1	gdnE	M1	EDH	M	Streptomyces sp. K01-0509	Actinomycetes	WLVLADGPAGRALADAARARGVDCRTADPAGADGPDGFTRLLDEAGDRDLVVAAWPVEAAADGPSDGGPSDGGPSDGGSSEAALDHGVRLLHLVQALTARGERAPRLAVVTRGAQALADREATEPAQAALWGFGRVVVLEQPDLRHTQIDLDPTRPAAGQAAELAAELHALAGSDENQIAYRGGVRHLARL
BGC0000998.1	gdnF	M2	AKR	M	Streptomyces sp. K01-0509	Actinomycetes	WHITGTTTDVDLGPHATTVTDPTDADHHLYLPDPTDHTTRTTAEHTHHLTTELLALVHHLTTTGTRAHLHVITRHAHPLTPHDHPDPAHTALWGLVRTINAEHPELHCTITDTDPHTTPHHALTTHHPHSALRGTTRHTPTL
BGC0000998.1	gdnG	M3	ER	M	Streptomyces sp. K01-0509	Actinomycetes	WHVTGTTTDVDLGPHATTVTDPTDADHHLYLPDPTDHTTRTTAEHTHHLTTELLALVHHLTTTGTRTHLHVITRHAHPLTPHDHPDPAHTALWGLVRTINAEHPELHCTITDTDPHTTPHHALTTHHPHSALRGTTRHTPTL
BGC0001003	lipPks1	M1	A2KR	MM	Kitasatospora aureofaciens	Actinomycetes	WLAVVPVRHLDDPSVTTSLDAVAKAGAEVVQLAIEDADADVDRLTERLRGLVAGLGAAPAGIMSFLGLDEERHRDHPAMPSGLATSLALVRALGRAGIGAPLWMVTREAVAAGQDTHPHAPLGSLIWGLGQVTALEHADRWGGLIDLPGVCDARVARMLCAGLSGRGAEDQLALRPSGTFVRRL
BGC0001003	lipPks2	M2	EDH	MM	Kitasatospora aureofaciens	Actinomycetes	WAVLGDSPLGDGGLAFADADALVASSADLPDTVVLECPAGEGAGAVPEVVRARLAEVLGVVQRWVADERLASSRLVVVTRGAVGLRAGETVDVRVAPVWGLVRAAQAEHPDRFVLADLPAGAGARELAAGLASREPQWAVRDGVVRVPRL
BGC0001003.1	lipPks2	M3	EDH	M	Streptomyces aureofaciens	Actinomycetes	WAVLGDSPLAEGGPVFADVEALVASSQDLPGTVVLQCPAVEGAPVPDAVRDRLTGVLDVLQRWVADERLASSRLVVVTRGAVAASANEPVDVRVAPVWGLVRAAQAEHPDRFVLADLPAGAGARELSVGLACDEPQWAVRDGAVRVPRL
BGC0001003.1	lipPks3	M4	EDH	M	Streptomyces aureofaciens	Actinomycetes	WAVLGDSSLAEGGLVFADVEALVASSQDLPGTVVLECPAVEGAPVPDAVRDRLTGVLSVLQRWVADERLASSRLVVVTRGAVAASADEPVDVRVAPVWGLVRAAQAEHPGRFVLADLPAGAGARELAAGLACDEPQWAIRDGAVRVPRL
BGC0001003.1	lipPks3	M5	EDH	M	Streptomyces aureofaciens	Actinomycetes	WAVLGDSPLAEGGLVFADVEALLASSQDLPGTVVLECPAVEGAPVPDAVRDRLTGVLGVLQRWVADERLASSRLVVVTRGAVAASANEPADVRVAPVWGLVRAAQAEHPDRFVLADLPAGAGARELAAGLACDEPQWAIRDGAIHVPRL
BGC0001003.1	lipPks4	M6	EDH	M	Streptomyces aureofaciens	Actinomycetes	WAVLGDSPLAEGGPVFADVEALVASSQDLPGTVVLECPAVEGAPVPDAVRDRLTGVLSVLQQWVADERLASSRLVVVTRGAVAASANEPADVRVAPVWGLVCAAQAEHPGRFVLADLPVGAGARELSAGLACDEPQWAIRDGAVRVPRL
BGC0001003.1	lipPks4	M7	CKR	M	Streptomyces aureofaciens	Actinomycetes	WLLTIPARIGADDALVTRLASALGGAGADVRVVTVGDPGADSYDDLAAEVSSLTADGGELAGVLSLLGLASADGPGDAREAAVGTLALLRALSGSVASVPVWSLTSGAVSTGGSERVSAPAQAVLWGLGRLLAEDSDVRWAGVVDVPAPCGDRVLRRLAEVLANPAEETEVAVRDAGVFARRL
BGC0001004.1	lobA5	M1	EDH	MM	Streptomyces sp. SCSIO 01127	Actinomycetes	WAVLDDAARAADLGADPYPDLAALREAVADGAPVPGLVLAGPAAAADGAAPDAAAHATAARALTLVQEWLALGEERLDAARLVVVTRGAATVDGARDVPSPDAAAVWGLVRTAQTEHPGRFVLLDLDDEAAPARALAAVAASGEPQLAVRAGEALVPRL
BGC0001004.1	lobA1	M10	EDH	MM	Streptomyces sp. SCSIO 01127	Actinomycetes	AVVGDIEVGDGRGERYPTMEALRAAVADGAPVPRVVVMSCGTAGSAADPSQGTHAETSRTLERVQAWLADETFASSVLTLVSRGALAVTDGEDVPDLAAAAAWGLVRSAQSENPFRFQLLDVDGPVPEDLLAAAVALGEPQAAVREGRVRVPRL
BGC0001004.1	lobA2	M11	CKR	M	Streptomyces sp. SCSIO 01127	Actinomycetes	AVRPLLLVTRDASGSRRGDESDGDGGPAAQVIDALGDAALHVVLPATAVDEDDLSALVREKVPGGTDVCGVVSLLPPTAALPRALERAGVDAPLWVLTSGAVTVGRLDPPADPEQAVARGLGRALARAHPGRRVRLLDLPRELDEQVRRRLLELLRTAPADDLLAMRGTGLFTARL
BGC0001004.1	lobA5	M2	EDH	M	Streptomyces sp. SCSIO 01127	Actinomycetes	AEVVFAECSAPDDGDGDGAEAVHLVAERALELTRRWLAEERAAVSRMVVVTRGAVVTGPDDRLTDPAGAAAWGLVRSAQLEHPGRFVLLDVDGDDASVQAMGPAAASGEPQLAIRNGRCHVPRL
BGC0001004.1	lobA5	M3	EDH	MM	Streptomyces sp. SCSIO 01127	Actinomycetes	TVLLGEDLFSTGLSPACGDLTELTEGPSVPDTVLACFAAEGDADLVAETHRLTGRALELVQRWLAEESTADSRLVVVTRGAVAAASHDDVADLPAAAVWGLIRSAQSEHPGRFALLDLDSADSGVRPDTAETPARAIEAAVAALVDGDEPQIALRDGVPLAARL
BGC0001004.1	lobA4	M4	0DH-BKR	M	Streptomyces sp. SCSIO 01127	Actinomycetes	WAVLGEDTTHSPGVPGSPVSSSSSDTSDTSDTSGVHVPDLAALGRLVDEGTPVPGAVLVPCPDGGDGDAEAQLTRMLELTHAWLSDERYADARLVVLTRGAVAVHDTDRIDNLGQAAVWGLLRSAQAEHPDRFAVVDLDAEATTTSVLAALATAEPQLAVRDGVPYAPRL
BGC0001004.1	lobA4	M5	EDH	MM	Streptomyces sp. SCSIO 01127	Actinomycetes	WAVLGNAVAEDGPDALGDACAGLPRHRELGDLVRSIDSGAAVPDVVLLPCDGGPPEEGDPAARGHHATRHVLQLLQDWLAEDRFAASRLVVVTRGAVPVDADDPVRDLAGAAVWGLLRAAWWEEPDRFALVDLDGTDASVRMLGAAIDSGEPQVLLRGGTAHVPRL
BGC0001004.1	lobA4	M6	EDH	M	Streptomyces sp. SCSIO 01127	Actinomycetes	GVPADGHVLGDAEALTGAEAQADAEAQADAEAQADAPVLADGHVLAGADVPAAFDGALSELVSASGPLPDAVLVPVDTSVGSPEEVRAAVTGVLRTAQEWLAEEGTAASRLVVVTRGAVSAGAGDPDVDLAGAAVWGLVRSAQNEHPGRFALVDLDGSRASARALAAAIARAEPQVALREGRPLVPRA
BGC0001004.1	lobA4	M7	EDH	M	Streptomyces sp. SCSIO 01127	Actinomycetes	TRIDWLDDPAPSLLVSLAGIAEPRALADDAPAPGLVLLDCTDHDGPGDQAKRTRRATHRVLDVVRTFLTDDRFAASRLGVLTRSAVAAVGGDTVEDLAGAAVGGLIRSAQTENPDRIVLIDIDGTEESALALPAALHTAEPRLALRAGRAYAARL
BGC0001004.1	lobA3	M8	0DH-B1KR	MM	Streptomyces sp. SCSIO 01127	Actinomycetes	FGAPADPPNVSGVETLTVEAAPGSGPDAAHSTALGTLRAVQQWLAREQDSDSRLVVLSRGAVAAGSEDTITDLPAATVWGLVRAAQNEHPGRLVLLDHDGTRASLDGVDAAVRAAVATGEAQLALRDGRCLVPRL
BGC0001004.1	lobA1	M9	ER	MM	Streptomyces sp. SCSIO 01127	Actinomycetes	WAVLGSLPDPLRDGIGGDVRAVADLDALRARADAGAELPEVVLAFVPSHDGNPADGARATAHWARRLVRQWLADDRFESSRLVVVTERAVAVRAGEHVPGLAASAAWGFLRVAQLERPDHFHLVDLDGRDSSLRRLRKALASGEPQLALRDGEAHTARL
BGC0001010.1	melD	M3	EDH	M	Melittangium lichenicola	Myxococcota	WLVLADATGTGDALVRSLRGRGVRCVVARPGAAYAAHDGQTFTLDPSRMEDFSRLLRDASAPGTPPCRGIVHLWGLEPDAPVTLASLREAQRLGCESVLHLTQALVRGEFPVRPRMFLVTRGTQRTGQEPTPPALAQSALWGLGRTLALEHPEFSPALVDLDSRAPSTEDASLIAELLHVPRGEQVAYRQGQRYVARL
BGC0001010.1	melE	M4	OMT-A1KR	MM	Melittangium lichenicola	Myxococcota	WLILSDRSGVGQALAERLRAKGEPCTLLHANEEKRFEQVAQGAWRGVVHLWTLDGGSLSEVLATGCESLPSLVQGLGQSSSPGARLWLVTRGAQAVGKDIPSVTLAPLWGAGRVLALEHPELWGGLLDLPSEWNASQVDALCEELLHSDGEDQIAYRAGSRHVARL
BGC0001015.1	mcyG	M1	CMT-A1KR	M	Planktothrix agardhii NIVA-CYA 126/8	Cyanobacteriota	WLIFTDSHPEKDHLPRFIQAQLSKNYGSCTIIYQGQNKIKLSQFEYSLNAHQPEQIKAWFAENPSPHRIIYLLNDNHQDQPESILLNRCHYLLNLLQAIQKIPNSPKLFVVTQGGQPFELKQPTFVTQSPLWALGRVISLENPELWGGMIDLDPSADITQNIADLLLGLTHSISEDHLLFRNGQAYLGRL
BGC0001015.1	mcyD	M2	CMT-EDH	M	Planktothrix agardhii NIVA-CYA 126/8	Cyanobacteriota	QIIFADTQGIANNLIPPLQQRGVGCSMLFPEDINPDSAEDYLSVLQTLLTPETHQILYFWGLEKIAGEIDQEVEIHCQRFLFLLQALLQQKNPPDLILVTQGAVPAKEIKTLTSPAQSSLLGIAFSLVLEHPELNFRAIDLDPNEQNLAEKLFREIYSNTPENRIALRGEQRFCPRL
BGC0001015.1	mcyD	M3	EDH	M	Planktothrix agardhii NIVA-CYA 126/8	Cyanobacteriota	WLIFVHPKTALNPLINLLKKAGEKVIIVEIGNNYQCYSQDYFVINSAENTDFQRLYQQAYPSGELPTGIIFSWETVSFAEDTESFYTSCQAALNLIQTLTNNWQKLPDLWLITRGANQVLEDPSLEPQQSYLWGLGAVINQEYPQMRCVCLDLSTTKEAEEAELLFNQLHTSNNELRLALRQGNCYGARL
BGC0001022.1	mxaF	M1	EDH	MM	Stigmatella aurantiaca	Myxococcota	WLILSDSSGVGQRLSSLLRARGETCVLVQPGEKYRSIGPGAYEVDPRNGEHLRRLLGDAMGAGAPPCRGVVHLWSLDCASNDALTPQSLEASRRLGTTSVLHLVQALSRAGWRDAPRLWLATRGARSVGKEPQRVNVAQAPLWGLGQVLSLEQPELRCTRVDLEGGADICADALIREVSSTVFEDQAAWRAGTRLVARL
BGC0001022.1	mxaE	M2	0DH-A2KR	MM	Stigmatella aurantiaca	Myxococcota	WLVFLDRGGWGTALVEEIGRQGQPCVTVTAGETFQRQDARRFVVNPKRPEDMERLLRELPALPAGHEGRAVYLWGLDAVLDEQTGTPESSVAALHLVKALMGSPARARLWVVTRGAQVTGVGTERVSLAQAPLWGMGRSVSLEQPGVWGGLIDLAPERVAEETAAVLREISAFGGDGEDQIALREKRSLVPRI
BGC0001022.1	mxaD	M3	EDH	MM	Stigmatella aurantiaca	Myxococcota	WLVLADRQGFGKKLQAVLRERGEQCVLVSQGEESRLVEPGHYVVDLSKTEGFARILEAEFGSGRPACRGVVHLFSLDAPRPEEGLQALAKARSLGAESALHLTQALVASGFRDMPRVWLVTEGVQAVKPAERVAHVEQAPIWGIGRVLSLEHPEFRCCSVDLGALDEAQARVLADELFSSTLEEQVALRGTARFVARL
BGC0001022.1	mxaC	M4	EDH	M	Stigmatella aurantiaca	Myxococcota	WLVFADARGIGQSLASGLAERAGGCVVVEAGPSYERLEADRYRINPSKLEDFQALLKEAFSDQSPCKGMVHLYGLDVASNVTEPESFERALSLSSTSVVYLLQAWAQRGWRDTPRLWLVTTGVQVIASGEQPGSPAAAPLVGLAAVITHEHPELRCAHVDLSAQPSPEEIASLTEELLGDGAEDRIALRGAVRHVARL
BGC0001022.1	mxaC	M6	EDH	M	Stigmatella aurantiaca	Myxococcota	WIVFADETGTGEALAERLLKSGCRPVLVRPGEAFARQDGDRFTLDAQRAEDYARLLKEAVPSGESLGGVVHLWAMRGAHGNDVESLHAAHQLGGGSALHLAKAVASFPSAARLWLVTRGARALPSHSGPLALNQVPVWGLGVVFSQEHPERCGALIDLDPSASGEDATAIWRELSAADGERQVVIREGQRHVARI
BGC0001022.1	mxaB1	M7	0ER-EDH	MM	Stigmatella aurantiaca	Myxococcota	WLLIADGSELADTVESQLRERHGEVIRVDLAGAGQGRRVVDATSPQAFDGVLSEAFGAGSAPRGVIHLTGLEPREVDPIMGCGGVLHLVQALSRVSLASPPRLWLVTRGVHHGSGSRSASDVVQASLWGLGRTLAHEHSELKCTRVDVSAAMGTGDAGAALMRELLVADDEEEISLRADGRHVGRI
BGC0001024.1	mtaB	M1	EDH	M	Stigmatella aurantiaca DW4/3-1	Myxococcota	WLLLADRGGLAARLAEQLSSRGSRVEVLAAEENAQSMLGRIEAIDASGLACAGVVDLRGLDEGSSSDAVQGAVKRVQQLVTRRAAEALRLVLVTRGTQVTGSQDGSIAFEQAPLWGLGNVIALEHPELRCQRIDLDPSPGAPDAAQLAAELAAPGREDRVAFREGRRLVARL
BGC0001024.1	mtaB	M2	EDH	MM	Stigmatella aurantiaca DW4/3-1	Myxococcota	WLLVADRGPAGEELAARLKREGQVCHVLAAPESAVTGEALLQRVEEALALEAYRGVVYLSALEAEQESPQGKSQAALEGVSGAVQVLQAIAKLERGTPPRLWLVTRGAQALEESPRPLALAQAPLWGLGLAVRDEHPELRCTLIDLDPDPAADGVGCLFQELLTPDREDRIAWRGGARFAQRL
BGC0001024.1	mtaD	M5	EDH	M	Stigmatella aurantiaca DW4/3-1	Myxococcota	WWVLADSAGVGTRLVEALQSHGARCVVVRPGPAYEARADRTFVLNPARVEDFERLLVDSQGPANLPCRGILHLWGLDEAPSLEAAQELGCRSVLNLAQALGKSRLEVSPRLWIATRGTQRTGHETQPPSLTHAALWGLGRTLAVEHPELSVALLDLDERAHASEDSLLIEEFLLDPDGEQVAFRNGRRYVSRL
BGC0001024.1	mtaE	M6	OMT-A1KR	MM	Stigmatella aurantiaca DW4/3-1	Myxococcota	WLVLADGRGLGDALATRLREQGAPCTVLRAGGEASGPGQLSVNPKDPAEWQRVLGQLEAEGPFRNVVHLWSLDSGSQAASSVAVLEETLRLGCGSLPLLVQRLSRGSGQKAKLWLVTRGTQAVGKEAVSVAQAPLWGAGRVLALEHPEMWGGLVDLSPEAPAHELEALWQELRMPDGEDQIAYRGAKRHVARL
BGC0001029.1	npnA	M1	ER	M	Nostoc sp. 152	Cyanobacteriota	WLIFADSQGLGQQLSEQLQNFGVNCTLVSAGVKYEKIEQQHYHIDSSQAEHFQKLLYDIGSQEQQLGIIYLWGIAQNENNLPDAELKNCGSVLHLVQALTQVSWQVSPHLWLVTQGTQAISSISEPLQLSGSSLWGLGRVIATEHPEFQCVRLDLSLQGTQQQHLQALLLELSAADKEDQIAIRQNKRYVARL
BGC0001029.1	npnA	M2	BKR	M	Nostoc sp. 152	Cyanobacteriota	WLIFADTQGLGKQLGEQLQNLGGNYTLVSAGVKYENVDRQHYQIDPSQAEHFQKLLYAIGSQQKLGIIYLWSITQDESNLPDAELKNCGSILHLVQALAQFSWQVSPHLWLVTQGTQAISSISEPLQLCGSSLWGLGRVIATEHPEFQCVRLDLSVQETQQQHLQALLLELSAAEKEDQIAIRQGKRYVARL
BGC0001033.1	pamA	M2	BKR	M	Paenibacillus larvae subsp. larvae DSM 25430	Paenibacillus	WLIFADGPGIGEYMAERLKKDHRHVITVDIGTGFRKISEQEYVMDPGIPANYQALFSELQASGRFPDRIIHLWSISSSSTSQLTVSQLQLAQDAGFYSCMYIAQSIGLLKVTKQIRMAVITSNMQDVTGEEALNPEQATVLGFVKICPLEYANISCQSIDITTNIETPDLIERILGDISAPQPDLMIAYRGSYRWTPLY
BGC0001033.1	pamB	M3	A1KR	MA22	Paenibacillus larvae subsp. larvae DSM 25430	Paenibacillus	YLLFMDEYGIGTALSELIRADGSEVLHVRLGSAFEKREDKEYIINPHSESDYLLLMKSIRETGRAIHKIIHLCSLNREREALQRLTDSQTRGYYSVLHLVKAALNVFMAEKLQIHVIANNIHEVIGTEQLYPEHSTILGPCKVIPQEYTNISCRIIDIEMAELPDPKLIDQLKEEFHNLGPEPVVCLRVGKRWLKYY
BGC0001033.1	pamF	M8	BKR	M	Paenibacillus larvae subsp. larvae DSM 25430	Paenibacillus	LLFAAENKIGDKLHRAIAKKTDVILVRPGSAFLKESSHAYTVRPQEYDDYDRLFADLKECGSLPEIIIQAWDVDSCNQSSVDCLGRESDLSMLSLMRIAKTIGGQKLDDPVEIVVLTSGIHPITETENLCPERSTVLGPVRVIPLEYVNLTCRSIDVIPSVSGVWDDKLIQIIINEAMSRLPEAVVAYRGYSRWVEDF
BGC0001033.1	pamG	M9	AKR	M	Paenibacillus larvae subsp. larvae DSM 25430	Paenibacillus	WLFFIDETGLGQQVADRMKQEGHEVITVRQGREFDKKGTGSYQIDPGVYDNYISLIDDALSTGKTLKNIVHMWSISAGLDTRLDKKIVEDAQVSGFYSLIHLAGALRKQNIPGQIHIDVVSNNSMDVTKNEVLRPEKATILGLCKVIPQEFQHISCRYMDIEFTEDRVSSRHSAQLMNEIRSEAAEPVVAYRGNNRWVQTF
BGC0001034.1	pelA	M1	EDH	MA21	Sorangium cellulosum	Myxococcota	WVVFSDRGGVGAGLHGRLTGAGQRCVRVFAGEGYEQIEPDLYRIDPGKRGDYARLLREAFGEEGSCGGVVHLFSLDAAPMEATTAEALAAELVSGSVSAAYLTQALVRHGFRDAPRLFLVTRGAQGVQEHEAVSVGQAPVWGLGRTIALEHPEVQCTRIDLAPGASEADAARLARELGAAGPEDQVALRGDDRYVARL
BGC0001034.1	pelB	M3	EDH	MM	Sorangium cellulosum	Myxococcota	WVVFSDRGGVGAGLHGRLTGAGQRCVRVFAGEGYEQIEPDLYRIDPGKRDDYARLLREAFGEEGSCGGVVHLFSLDAAPIEAATAEALAAELAGGSVSAAYLTQALVRHGFRDAPRLFLVTRGAQGVHEHEAVSVGQAPVWGLGRTIALEHPEVQCTRIDLAPGASEADAARLARELGAAGPEDQVALRGDDRYVARL
BGC0001034.1	pelC	M4	EDH	MM	Sorangium cellulosum	Myxococcota	WVVFSDQGDVGAGLHVRLSGAGQRCVRVFAGPGYERIEPDLYRIDPAKPGDYQRLLSEALGEEGLCQGVVHLFSLDAAPLEATTAETLSADLVRGSVSAAYLTQAIVRHGFRDAPRLFLVTRGAQAALEGEPVSVGQAPLLGLGRTMALEHPELKCTRIDLSATAAEGEAESVARELGARGREDQIALRREGRYVARL
BGC0001034.1	pelD	M5	EDH	M	Sorangium cellulosum	Myxococcota	WVLLEQGSALAPGLAARLRASGARVVTSTWEELRDGVEQALAGVASIAGVVCLWGEAPSPGPGASASVVDEAERTSARALGVIQALVGRGATSQLWFVTQGAQAVEPGETASVSQAPPWGLGRVAMVEHPELECRLVDLAPGAEDGLEALWQELCCPDDERQIARRAGKRLGLRL
BGC0001034.1	pelD	M6	ER	MM	Sorangium cellulosum	Myxococcota	WLVFSDQRGVGAALKARLSGVGQRCVRVFVGGGFERIEPDLYRIDPTKPGDYQRLLREALGEEGSCRGAVHLFSLDAAAVEATSAETLSADLGRGSVSAAYLAQALVRHGFRDAPRLFLVTRGAQAVEEGEPVSVGQAPLLGLGKTIALEHPELRCTRIDLSAAGGEGEAELLARELGARGREDQIALRGEGRYVARL
BGC0001034.1	pelE	M7	0DH-B1KR	MM	Sorangium cellulosum	Myxococcota	WLVFLDQKGTGTALRELLSARGEASVGVLPAERYARLQPDLYQIDLAEPEHYRRLLREAFGDEEEACRGAIHLFSLDAAPWEQTTAETLDADVTRGSLSALYVAQALLRRGWRDAPRLWLVTRGAQKVGAGDGVAVSQAPLWGLGRTIALEHPELRCTRVDLSPAASAEEVTALVGELWSQDGEDQIALRDHGRHVARL
BGC0001034.1	pelF	M8	ER	MM	Sorangium cellulosum	Myxococcota	WLVFSDQRGVGAALKARLSARAQRCVRVVAGTSYERVEPDLYRIDPTKPGDYQRLLREALGEEGSCRGAVHLFSLDAAAVEATSAETLSADLGRGSVSAAYLAQALVRHGFRDAPRLFLVTRGAQAVEEGEPVSVGQAPLLGLGKTIALEHPELRCTRIDLSAAGGEGEAELLARELGARGREDQIALRGEGRCVARL
BGC0001040.1	rapA	M1	ER	MM	Streptomyces rapamycinicus	Actinomycetes	LTVGRFEDLVSGGDVPVPEVVVFTALPGSSETPLDPLDPLAQTRTLTAQVLQAVQAWLAGEGFTNSTLVVRTGTGLAAAGVSGLMRSVQSEHPGRFVLVECDDDTLTPDQLAATVGLDEPRLRVCDGRFEVPRL
BGC0001040.1	rapB	M10	EDH	MM	Streptomyces rapamycinicus	Actinomycetes	GVTVGKFEDLADGEVPMPDVVVFTALPDSGDPLAQTRRLTAEVLQAVQVWLAGERFTDSTLVVRTGTGLAAAAVSGLMRSAQSEHPGRFVLVESDDDTLTPDQLAATVGLDEPRLRVIDGRYEAPRL
BGC0001040.1	rapC	M11	0DH-BKR	M	Streptomyces rapamycinicus	Actinomycetes	GLTVGAFEDLAADGDVPVPEVAVFTALPDSDDPLEQTRKLTAQVLHTLQEWLGGERFSDSTLVVRTGTGLAAAGVSGLMRSAQSEHPGRFVLVESDDALTQDQLAAAVGLDEPRLRVSDGRYEVPRL
BGC0001040.1	rapC	M12	0DH-BKR	M	Streptomyces rapamycinicus	Actinomycetes	GLTVGRFEDLVSDADVPVPEVAVFTALPDSSENPLEQTRVLTAQVLQAVQTWLGGERFTDSTLVVRTGTRLAAAGVSGLMRSAQSEHPGRFVLVESDDDTLAPDQLAATVGLDEPRLRVSGDRYEAPRL
BGC0001040.1	rapC	M13	ER	MM	Streptomyces rapamycinicus	Actinomycetes	LPMVRYEDLADGNMPVPDVVVFTALPNSSENPLGPRPAGPADPLAQPDTDRQVLKPFQTWLPGTFTDSTLVVRTGTGLAAAAVSGLMRSAQSEHPGRFILVESDDDTLTLRQLAATVGLDEPRLRINDGRYEAARL
BGC0001040.1	rapA	M2	0DH-BKR	M	Streptomyces rapamycinicus	Actinomycetes	GLTVGAFEDLAADGDVPVPEVAVFTALPDSDDPLEQTRKLTAQVLHTLQEWLGGERFSDSTLVVRTGTGLAAAGVSGLMRSAQSEHPGRFVLVESDDALTQDQLAAAVGLDEPRLRVSDGRYEVPRL
BGC0001040.1	rapA	M3	0ER-0DH-C2KR	MM	Streptomyces rapamycinicus	Actinomycetes	LTTGRFEDLVDADVPVPEVVVYTARPDTDGSPDPLAQTRTLTAQVLQAVQAWLAGERFTDSTLVVRTGTGLAAAAVSGLMRSVQSEHPGRFVLVEGDDDTLTPDQLAATAGLDEPRLRVCDGRFEVPRL
BGC0001040.1	rapA	M4	EDH	MM	Streptomyces rapamycinicus	Actinomycetes	GLTVGRFEELVSDGDVPVPEVAVFTALPDNDDDPLEQTRKLTGQVLQAVQEWLGGERFSDSTLVVRTGTGLAAAAVSGWMRSAQSEHPGRFVLVESDDDALAPDQLAAAVGLDEPRLRISDGRFEAPRL
BGC0001040.1	rapB	M5	0DH-BKR	M	Streptomyces rapamycinicus	Actinomycetes	GLTVGAFEDLAADGDAPVPDVVVFTALPGNDDPLAQTRILTAQVLRTVQEWIGGERFSDSTLVVRTGTGLAAAAVSGLMRSAQSEHPGRFILVESDDDALTPDQLAATVGLDEPRLRISDGRYEVPRL
BGC0001040.1	rapB	M6	0DH-C2KR	MM	Streptomyces rapamycinicus	Actinomycetes	SLSVGRYEDLADGDVPVPDVAVYTARPEADGSPDPLVQTRTLTAQVLQTAQAWLGGERFTDSTLVVRTGTGLAAAAVSGLMRSAQSEHPGRFVLVESDDDSLTLHQLAATVGLDEPRLRVNDGRFEVPRL
BGC0001040.1	rapB	M7	ER	MM	Streptomyces rapamycinicus	Actinomycetes	LSVGRFEDLADGDVPVPEVVVCTALPDSSENPLAPLDPPDPLVQTRTLTTQVLQAVQAWLAGERFTDSTLVVRTGTGLATAGVSGLMRSAQSEHPGRFVLVECDDNLTLQQLAATVGLDEPRLRVCDGRFEVPRL
BGC0001040.1	rapB	M8	EDH	M	Streptomyces rapamycinicus	Actinomycetes	SLTIGRFEDLADADVPVPEVVVFTARPDSSENPLAQTRTLTAQVLQKIQAWLAEERFTDSTLIVRIGTGLAAAAVSGLMRSGQSEHPGRFVLVESDDDTLAPDQLAATVELDEPRLRISDGRFEVPRL
BGC0001040.1	rapB	M9	EDH	M	Streptomyces rapamycinicus	Actinomycetes	GLTVGRFEELVSDGDVPVPEVAVFTALPDNDDDPLEQTRKLTGQVLQAVQEWLGGERFSDSTLVVRTGTGLAAAGVSGLMRSAQSEHPGRFVLVESDDDALALDQLAAAVGLDEPRLRISDGRFEAPRL
BGC0001042.1	sfaE	M1	ER	MM	Streptomyces flaveolus	Actinomycetes	CAVLGDGPEGLAAPLSTALADIDAGAVDLVLAPVSTGADVVAAAHRATAQVLELLHEWLADDRFGQARLAIVTRHAVAARPGEEPDPAAAAVWGLVRSAQTEHPDRFLLVDTDGTPASLDAVPAVGDEPQTALRDGERLVARL
BGC0001042.1	sfaH	M10	EDH	M	Streptomyces flaveolus	Actinomycetes	PADDPEDDDITVVPVTGRTAGGDVVAEVRAAVAAALARLQEWLADDRSERLVLVTRGAVAALPDEAPDPVAAAVWGLVRSAQSEHPGRFVLADLAASEDAAVVSAAVATGEPQIAVRNGALYAPRL
BGC0001042.1	sfaH	M11	EDH	M	Streptomyces flaveolus	Actinomycetes	WAVLAPADAELTDVLGAGIETVKDLATVPDDLDIVLAAVSDRGGAGVDAPTAASVGAAAETDVPEAVRAILRGALGLVQTWVAGESAARLVLLTRGAVALAGERPDLAGAAAWGLVRAAQSEHPGRLVLADVDDDPASLAALPAALATGEPQLLIRAGAVRAARL
BGC0001042.1	sfaI	M12	A2KR	MM	Streptomyces flaveolus	Actinomycetes	WLLVVPEPRAGDALAARCAAALTGHGAEVTTLTLGADDTDRAALAARLTGLRPAGVLSLLALDDAPHPAHPALPTGLALTVALVQALGDAGVTAPLWCATRGAVATGPADPVTAPVQAQIWGLGRVVALEHPDRWGGLIDLPAEWDDRAAGRLAALLAAGGDEDQTVLRATGVSARRL
BGC0001042.1	sfaI	M13	0DH-B1KR	MA15	Streptomyces flaveolus	Actinomycetes	WAVLGADPLGAADTLRSLGHTVHGADGPAGLTEVPDAVLITAVGAPGEAPAEARTVLHGTLAALQTLLADDRFTAVPLVVLTRGAAADRADDLAGAAAWGLVRSAQSEHPGRFVLADIDDDPRSWRALGGVPATGEPQLALRAGAATVPRL
BGC0001042.1	sfaF	M3	0DH-B1KR	MM	Streptomyces flaveolus	Actinomycetes	GLPLPGYPSCPDLAAVAALDTVPGTLVLPCRQQSADDTAGAAHAGARRVLTALQEWLADERLAGTRLAVLTHGAVPVEHEDVTDLAHAPVWGLIRSARAEHPGRLVLVDIDGPDALQQLPAVLATGEPEIAVRSGRVLAPRL
BGC0001042.1	sfaF	M4	BKR	M	Streptomyces flaveolus	Actinomycetes	WLVAVPAAGADAALVRECLKGLAGRGVEVAELAVAGAPDRARLAEAVSATGPVDGVLSLLAAGPDAAAGTLVLAQALGDAGTDAPLWCVTGGAVAAADGEPADPEQAQVWGLGRVLCLEAPHRWGGLVDLPAEPDEQAVVQLCAVLAGHDDEDQVAVRAAGVFGRRL
BGC0001042.1	sfaG	M5	A1KR	MM	Streptomyces flaveolus	Actinomycetes	WLAVAADDPWSDAVVTALADRMDLTRVPAYDPGTVAELTAGTAGVVAVLRPDDPDPLPGLLALLRAHDRADGGLPLWCVTRGAVATGPADTPADPATAQIWGFGRVAALERPQSWGGLIDLPAGATVTGDALAGTARADGPPDARIADDVLGARLADRLVAALAGPEDQVAVRASGAFGRRL
BGC0001042.1	sfaG	M6	ER	M	Streptomyces flaveolus	Actinomycetes	LALLGADTALAAGLTAAGAALADATDRSAEVLVLPIVTDPGAAPVTETHRATAAVLTALRDVLADEESTARLAVVTRGALALSAEESPDPAARAVWGLVRSAQTEHPDRIVLADLDAADASARALPAALTCGEPQLAVRSGAVSAPRL
BGC0001042.1	sfaH	M7	EDH	M	Streptomyces flaveolus	Actinomycetes	AATDVTGTDFTVFTLPAAGSDPQAVREATRASLARLQEHLAAVGPAGPLVVVTHGAVAAEPGDTVPDLAGAAVWGLVRSAQSEHPGRFVLIDLAASEDAAVVPAAIATGEPQIAVRNGALYAPRL
BGC0001042.1	sfaH	M8	EDH	MM	Streptomyces flaveolus	Actinomycetes	GAASAPSDDTAVELLRLDDAPHGTDAGPGGVRQAVRTALTAIQERIADDRAERLVVVTRDTDLAGAAVGGLLRSAQAEHPGRFGHVVLDGHPDSERALPTATALTDEPWVAVRAGETYVPRL
BGC0001042.1	sfaH	M9	BKR	M	Streptomyces flaveolus	Actinomycetes	WLLVGPEGDEALVADVATALREHGAEVTHLALPRDADRETTAELLRGTDDTGLTAVLSLLARADRPVHATLALVQALGDAEVTVPLWCATSESVAVASTDVVPEAAVDAAGLWGLGRVVRLEAPDRWGGLVDLPGALDARARRRLAAVLAGAEDECAVRENGAFAARL
BGC0001051.1	tgaA	M1	EDH	MM	Sorangium cellulosum	Myxococcota	WVVLGADDGGLLAALGGPRGGGVPTRAGTAAARVERHTDLAALRGALDRGEPAPEVVVISWTSRAIEVVDVVEAAHDAVQRGFALLQACLVDERLAESRLVLLTRRAVATRPDEDVVDLVHAPLWGLVRSAQSEHPDHPLFLIDLDDAEASLRALPAALASGEPQLALRGGALQVPRL
BGC0001051.1	tgaC	M11	EDH	MA10	Sorangium cellulosum	Myxococcota	WAFLSDGGPRERALKRALEGAGVGLDEASLDSLDGHGDVLRVWPAPEAGGGDLVERTGALLSRALAELQNLLSRAPRISRLVWVTQGAIATSDDDGVSTLEQAPLWGLLRSARLEHPELGLRLLDLGSGGAAADAVAQALSLDDEPDVALREERLLVPRL
BGC0001051.1	tgaA	M3	0DH-B2KR	MM	Sorangium cellulosum	Myxococcota	WACLGGDDLGLAAALGGAREGGAPADVGAAVARVEAYPDLAALQDAITRGERIPDVVAVPWMDEARDVAQAVHDVTHRGLSLLQAWLADERLAPCRLVFITRRAMATTPGEGGLDLAHAALWGLVRTAQIEHFERPLVLVDLDDRGASLRALRAALASGEPQLALREGALRVPRL
BGC0001051.1	tgaA	M4	BKR	M	Sorangium cellulosum	Myxococcota	WALVGVDDVRWREALQAAAVPVVHHADLAALKAALTPGQPLPEVVVVPWTADRGDDPAPAARDAARRGLSLLRAWLAEERLAPCRLVLLTRRAIATRPDEDVVDLVHAPLWGLVRAAQSEHPERPLVIVDVDEHGASLRRLPAALAAGQAQLAVRDGELLAPRL
BGC0001051.1	tgaA	M5	BKR	M	Sorangium cellulosum	Myxococcota	WALLGADAGGLSAALGAAGDGGVSTDVDAAALRVAGFADLAALTTALARGEPLPDVVVLLLWTEEARGSAAAAHGAAHRGLALLQAWLAEERFASSRLVLLTRHAVGARPEDGVLDLASAPLWGLVRAARTEHPDRSLALIDFDDSERSRRVLPAAIASGEPELAVRSGTLLVPRL
BGC0001051.1	tgaC	M8	BKR	M	Sorangium cellulosum	Myxococcota	WLLFTTDRGAALPDPSAPADPADDPLGRAVLRALTGRGATVVRVPVAEGECDRAALCARLREALGDGAAPRGVLSLLALDETPLPAHPALPRGLALTLALVQALGDAALEAPLWLVTRGAVSVGRAAPVEHPLQALTWGLGRVVALEHPERWGGLIDLAEASDDEALAPLAAVLGGHIAEDELALRPSGLFARRL
BGC0001051.1	tgaC	M9	A1KR	MM	Sorangium cellulosum	Myxococcota	WLLFYRALDAAPEGLSSAGRGAASADPSSDERAGDAIARAVHRALAERGAEVLPVPVAAGDLDRSRLAARLREVLGGGAAPRGALSLLALDEAALPDHPALPRGLALTLALVQALGDAAIQAPLWLLTRGAVSIGRSDPLARPLQALAWGLGRVVALEHPERWGGLLDLPDALDPRALERLTAALARPEDDQMALRPSGLFVRRL
BGC0001052.1	TamAI	M2	BKR	M	Streptomyces sp. 307-9	Actinomycetes	WLLLMPAGHESRPLVRDAVRALESGHGTVRQVALDTAVADRGRFAEQLRDVRAEFDAPVTGVLSLLALADADSEEEAGTVAPTLALVQALGDAGVEAPLWCATQGAVTTGGSDPLAHPAQAQVWGLGQVAALEHPDRWGGLVDLPEQLDERGAAHLRAVLAAAPGGEDRVAIRAAGVLARRL
BGC0001052.1	TamAI	M3	EDH	MM	Streptomyces sp. 307-9	Actinomycetes	WAVVGSGSGDSTMDVYDDLGSLAAAAAPVPELVFAPFPDTTDGTTADAGTADAVRQVTHRALDLVQAWLADDRFAASRLVILAGQGLTGAPVWGLVRSAQVENPGRFVLVETDGGGEPDWETLAAAAAGDEPQLRLHGTEVGAPRL
BGC0001052.1	TamAII	M4	A2KR	MM	Streptomyces sp. 307-9	Actinomycetes	WLVVFPEGRATDDVVRTAAEGLARHGAQVVPLELNASEAARGTYVDLIGEKLSAQDSPPAGVLSFLALDESPHPMHPAMTAGVAGTLALVQALGDARLEVPVWFGTCGAVAVGASDAVTSPAQAQVWGLGRVVALEQPERWGGLVDLPRELDDRARARLCAVLAGLAGEEQVAVRSSGVFARRL
BGC0001052.1	TamAII	M5	EDH	MM	Streptomyces sp. 307-9	Actinomycetes	WAVVGPDPLRVGRTLEETGATVFAADDLDSVATLDVVPDVVVVPYAPQQDGTDKLAARVHEVLYGVLDLVKRWLAEERFADSRLALLTRNAVVTSPDDTPDLEHAAIWGLIRSAQSEHPDRLVLIDTDHHTPDLPTALTTGEPQIAIRDGKYLVPRL
BGC0001052.1	TamAIII	M6	EDH	M	Streptomyces sp. 307-9	Actinomycetes	WLSAGEGLDGLSAPEVVVAPCPPGERASLHWALDLVKRWLAEERFADSRLALLTRNAVVTSPDDTPDLEHAAIWGLIRSAQSEHPDRLVLIDTDHHTPDLPTALTTGEPQIAIRDGKYLVPRL
BGC0001055.1	irp1	M3	CCMT-BKR	M	Escherichia coli	Pseudomonadota	WLPLSPAEPLPAPQTHYQWRWTPLNVASIDHPLTFSFSAGTLARSDELAQYGIIHDPHASSRLMIVEESEDTLALAEKVIAALTASAAGLIVVTRRAWRVEENEALSASHHALWALLRVAANEQPERLLAAIDLAENTPWETLHQGLSAVSLSQRWLAARGDTLWLPSL
BGC0001065.1	herB	M1	A2KR	MM	Streptomyces chromofuscus	Actinomycetes	WLLLAPAEGIGAPLVARCERALAEAGAEVVRPAAGDPAALTDLLTAGKTPAGVLSLFALDERRAPDGSAPRGLLDTVALAQALSGQEIPLWLATRGAVAVDPDDRLDHPEQAAVWGLGRALALESPRDRGGLVDLPAHLDDTAAALLAAALTGDSDEDQVAVRPAGLFVRRL
BGC0001065.1	herB	M2	EDH	MM	Streptomyces chromofuscus	Actinomycetes	TAALDTALAAGAPLPAVVAVRPDAPAGDDLAARVHGATARLLELLRTWLADERRAATRLVILTRGAVAVRADEEILGLAQAPLWGLVRAAQTENPDRFLLLDTDTGSDTDTDPGGDGDGDVDTAPGVDAAVAAVLAAGEPQAALRGGAVLVPRL
BGC0001065.1	herB	M3	ER	MM	Streptomyces chromofuscus	Actinomycetes	LLVLGADGLGVRAALETAGVSVAVCQDLADWNPAGDAPVPLSVVTGDLPGRTPREAVRRALALVRSWLADDRFAASRLVLVTRGAVSTRHDEDLTSLAQAAVWGFVRTAQAEHPGRFALLDLGAGEPPLAGLPAALASGEAQLALRSGGFLVPRL
BGC0001065.1	herC	M4	EDH	M	Streptomyces chromofuscus	Actinomycetes	LVVLGGDGLGLDLDPGAGPAVRVHAALAELDTVPDTVLAPFLTPGAGGTDLAGAAHTATRRALALVREWLADERFAASRLVFLTRGALTADLANAPVWGLVRAAQSEHPGRFTLLDLDEITPEGVRAGLAADHPQLRLTEGRLRVPRL
BGC0001065.1	herC	M5	EDH	MM	Streptomyces chromofuscus	Actinomycetes	GVILGEDILGLGLPAYPDLDTLAAARPAAGPVFATLSGGPGTDAVHTATHEALALAQAWTGDERFDGSRLVVVGRGAVATTGDEDVPDLAAAAAHGLLRSAQSEHPDRIVLVDIDHTGDSTALLYAAAASGEPNVAVRDGELRVPRL
BGC0001065.1	herC	M6	B1KR	MM	Streptomyces chromofuscus	Actinomycetes	RLVLLPATGDGAAWADALGDPTVRIVVDADDRATLAARLRAVRDALPDGGRITGVVSLLALDGRAGPAGTAVPVGTAATLTLVQALGDADVDAPLWLLTQGAVAVGPERLARVPQAQIWGLGRVVALEHPERWGGLIDLPESPDGAAVERLAGALTRTDDEDQLAIRASGVYARRL
BGC0001065.1	herD	M8	EDH	M	Streptomyces chromofuscus	Actinomycetes	LVALEDEDGTAYGAPGTASYAGLEALTKAIDDGLRVPDAVVVPCLSGRDAHGATHRALDLVREWLADDRFAPSRLVFLTSGAVGEGVTDLVHAPLWGLVRSAASEHPDRFALVDLDDPADRHRTLPAALAHGETEVIFRAGTPYAPRL
BGC0001066.1	ken16	M1	EDH	MM	Streptomyces violaceoruber	Actinomycetes	TWVMGDDGPGSEALAELLGAAVGPTADGPVPDVVVLAPTSPSADADPLSGARSALAEALTALSSWLTQERYDETRLLFVTRGAAGTATDGTAPDPAHAAVAGLLRTAQSEHPGRIVTLDRDDGPIPAEAVRVAVLDGDEPQLAVRDGALLTARL
BGC0001066.1	ken16	M2	0DH-B1KR	MM	Streptomyces violaceoruber	Actinomycetes	ADQPHVILTHLDTVYEGADGSVPEAVRAVLGEALTLLQEASEQSRTAFVTHGAVGDDGEAADPATAALWGLVRSAQSEHPDRFLLVDIDNDTASRQVLSSAVAAAVAAGEPQLAIREGRARVPRL
BGC0001066.1	ken16	M3	AKR	M	Streptomyces violaceoruber	Actinomycetes	WLVLAPAGHDDAPKIVEALSTGTGTGTGAVFVPLPPRPYDETALAAELDRAAASLSRPPAGLLLLAPDGDGSDDGQELAPGLAAALATVRSVMAARTGAAEPVVSWSGARLWTATRCAVRVDADDAPEDPVQAQVWGLGIVAGLEHPRRWGGLVDLPATLDDRALAALCRVLSGTDEDQVAVRSTGRYARRL
BGC0001066.1	ken12	M4	ER	MM	Streptomyces violaceoruber	Actinomycetes	ITFLGEDTLGIAHGLRAAGTEVSYAQDLAGLFDRAEATGTAPSTVVVTCAAEDAPGPETVRAAAARALELLRQWLADERFDSVRLLFLTRGAVSARTGEDVTDLVHAPLWGLLRSAQSEHPGRFALVDVDGASIAVGALRLALALDEPQLALRHGTPYVPRL
BGC0001066.1	ken12	M5	EDH	MM	Streptomyces violaceoruber	Actinomycetes	VALVGADRFDLFPPAGGRPDRGTEREVARYDDLAAVAADPGGVPGTVLVQCAADVVVTDSASAAEGVRAATVQAMELVQAWLADERFATARLVLVTRGAVAVRPGEDVADLVQAPVWGLVRSAQTEHPGRFLLLDVQEADGGHGTGALLRAVLGAGDEPQVALRGDTAYVPRL
BGC0001066.1	ken13	M6	ER	MM	Streptomyces violaceoruber	Actinomycetes	ITLVGPDRFGLAEAGLSIDLHEDIESLLSATGTPAASAVPDTVVVSVTSEEAHTAQEHAASTRPDAAAHRTAHRTLETLRAFLTDDRLDGTRLVLLTRRAVAVEDGAGSKDLDLAGATVWGLGRSAQSEHPGRVLLVDLDGEPGSADAVPAAIATGEPQVAIRAGVAYTPRL
BGC0001066.1	ken14	M7	ER	MM	Streptomyces violaceoruber	Actinomycetes	VGLLGPDAFGLTDALRGTGTEVVPYADMTAVREAAGADGLPENVLCAVLPPQGGAPVQATYDSTRRVLALAQEWLTDELPPEARLVVVTADGVTEPPDSRADDRALADAAVRALLRTAQSEQPGRVALVDLGRDWSAPVLAGALGHADEPELAVCAERLFTRRL
BGC0001119.1	divK	M3	CKR	M	Streptomyces sp. HKI0576	Actinomycetes	WLVVTTARVEDPAPLLARQGLRTVTVQVEPGAGPLTEQLGAALADDTVTGVLSLLALDDRRRPGSPLLTVGTAATLELVQALAELKARQRLCCVTSGAVSVGTDDPAPAVEQALVWGLGHATALEHPDRWAGLIDVPARLDDRSARALVAALAGLADEDQVAVRTTGLHVRRV
BGC0001119.1	divL1	M4	ER	MA3	Streptomyces sp. HKI0576	Actinomycetes	FDPVPVYGADDIRELAETADFGLPELLLLQLPGDGSGDGPGDDVTALTTRVLGLLQAWLAEPLLDDSRLLVLGDGGVAVHHARELTSVATAAAYGLLRSAQAENPGRVVIVDSDGTPASATALAATAGTDEPQLALRDGQAYARRL
BGC0001119.1	divL2	M5	EDH	M	Streptomyces sp. HKI0576	Actinomycetes	TAVPVATAADVRRLNGHEVAALAVPGTGDVRELTARVLAVLTAWLELPPADSARLVVTTRGAVAVDPADAPDPAGAAVWGLVGSAQAENPGRIVLVDSDGSLDAPSLPSLPDTDEAQLAVRSGRVHRRRL
BGC0001119.1	divL3	M6	ER	MA6	Streptomyces sp. HKI0576	Actinomycetes	PTPVTTVADLSAATGGGVLLHDVLPEPGPAAEAARDLTARVLEVLQQWLGDPALSESRLVVRTSGAVRVRDGETPDPALAAVWGLVGAAQSEHPDRIVLVDSDGSPASDAVLPSLLDADEPQCAVRDGVCFLRRL
BGC0001194.1	hitP1	M1	EDH	M	Streptomyces scabrisporus	Actinomycetes	RAVLGTDHRDLAALGAAIAAGAPVPDAVVVHLEPAEGAPPVAARAATIRLLDLLRDWSGDERFAESRLVLVTTGAVATGPDDKPADPALAPLWGLVRSAEAEHPGRFVLADLDGAATLPELPAGEPELALRGETVLVPRL
BGC0001194.1	hitP1	M2	ER	M	Streptomyces scabrisporus	Actinomycetes	FVSVGTDLPGSYESLAALGEAVAAGTLTGLDTVLLPCAPHSPDERAEVPDAVRALTSRVLVAVQDWLADERFGQARLVVSTQGAMALDGEAVTDPVGAAVWGLVRAAQAESPDRLVLVDADGPGAVARVLPAILAAGEPQALIRDGRGYVARL
BGC0001194.1	hitP2	M3	AKR	M	Streptomyces scabrisporus	Actinomycetes	WLVVHQAEQADAEMRALRAHGARVVPLAVADAEPRVDLLTARLTEAVDGDSSVAGVLSLPAEGASGALALTLTLAQALTAAGIDAPLWTATRGAVAVAPRESLPHPEQALAWGFGRVLALEQPERWGGLIDLPEVLDERAGARLAGVLAGGEDQVAIRTSGVLVRRL
BGC0001194.1	hitP2	M4	0DH-CKR	M	Streptomyces scabrisporus	Actinomycetes	HPVPQDLPELSAVSPDRVPDLVLFTCPVFTGDDPMADARALLGEVLQAVQLWSAEDRFAAARLVVVTEGVSTGADPRHAPVWGLVRAAEAENPGRFVLIDLDGSAESRRALPAAVASGEPESAICAGEPFVPRL
BGC0001194.1	hitP5	M5	AKR	M	Streptomyces scabrisporus	Actinomycetes	WLLVVPADHGDDKRVVAITEGLARQGARVVLIPDHDVDRSELTRSLLDKATEEPTVGVLSLLALDDRAHPRHPTLSRGTAGTVALIQAAADVCLTVPLWCVTANAVAVAPLDEPADLHQGALWGAAAALALDHPGFWGGMIDVPADLDDSATEALYRVLCAGTAEDRIAIRADGVHARRL
BGC0001194.1	hitP4	M7	ZDH	MM	Streptomyces scabrisporus	Actinomycetes	WDALAADDVVPAYVVLRCDGGRDAAAVRAQTHRVLRVAQAWSTDERYANATLLVVTRGAMALPGEDVTDPAGAAVWGLIRSAQSEEPGRIVLADLDGRDDDLLVALASGEPQVVVREGVAHAARL
BGC0001194.1	hitP4	M8	EDH	M	Streptomyces scabrisporus	Actinomycetes	WDELDSGGAVPDVVVLPVSGGSGPAAVRAALLRVLDAVQSWSVEERFADATLVVVTRGAVALEGEDVTDLAAAAVWGLVRSAQSEEPGRFVLADFDAGGDVDVPAVVGSGESQVVMRDGVAHAARL
BGC0001194.1	hitP3	M9	EDH	M	Streptomyces scabrisporus	Actinomycetes	WEALAPDGPVPPVVVARLGGGCTADDVRAQVRRALRVVQSWLSQDRFADAKLVVLTHGAMALAEEAVTDLAGAAVWGLVRSAQSEEPGRIVLLDGDRADVALALGSGEPQVVVRAGVVHAARL
BGC0001195.1	NsnD	M10	EDH	M	Nocardiopsis sp. CMB-M0232	Actinomycetes	MVAVGEELAGLPARPDLESVLAEFGEHEPPWVVCPVPATDSGDVPGAALESASEVLEAVQRWLSRDRGGARLVVATRAAPGAGDDAGASDPASAAVWGLVRVAQNEHPGRILLADVRDAAGLPAAVHAAAAAGEPQIAVHGGLVRAPRL
BGC0001195.1	NsnA	M2	EDH	MM	Nocardiopsis sp. CMB-M0232	Actinomycetes	WAVLDDTAVDAALRAHGVSVAAAAGLDALLDGIGDAAPPDVVVWTPPTGPADVVRAVHATTSAALAAVRRWLAEPATALSTLVVLTRGATVARAGETPDLAAATLWGMLRSAQAEHPGRFVLLDLDDRDDPGDRVGQAVLAGHATAVAADEPQIAVREGEILVPRA
BGC0001195.1	NsnB	M6	ER	M	Nocardiopsis sp. CMB-M0232	Actinomycetes	WAVLDGGDELAGHLRAHGAEAALVTDVGALAVDADGAPVPDAVVWRCPPAAAGEVPAAAHEAAAATLSVVRRWLTEPRLERSRLVVITRNAVAARDGEAPDPSLAPVWGLVRSAQSEHPDRFVLVDLDAGGVEAIVDAVASGEPQVAVRGGEVLVPRV
BGC0001195.1	NsnC	M7	ZDH	MM	Nocardiopsis sp. CMB-M0232	Actinomycetes	WAVPDQDDRLAGALRADGRTVGSFADVAAGADVPEVALWSHRPRAADVPAAVRESAGEVLALVRRWSAEPLYSGSHLVVTTRGAVAARDGESPDLATAPLWGLLRSAQAEHPGRFTLLDLDDAEESLAAVPAVVAAAVGGGETQVALRAGEAFVPRA
BGC0001195.1	NsnC	M9	ER	M	Nocardiopsis sp. CMB-M0232	Actinomycetes	WAVLGSGGEPAGRLRVRGDEVAAAADVDALLVGPDGAAVPDVVVWRCPENGAAGVADAAHESAAAVLSVVRRWLAEPRFERSRLVVITRNAVAAREDEAPDPALAPVWGLVRSAQSENPGRFVLVDLDDDGGGDLIAEAVGSGEPQVAVRGGEVLVPRV
BGC0001199.1	akaeolide1	M1	EDH	MM	Streptomyces sp. NBRC 109706	Actinomycetes	AWAALGGAEDGLAMGSLRLPAFSHDAEGAPPEVVLWPVPLGAEVGSVPDRARAATLQALATLQRWLADERLTGSRLVVVTRRAVSTGPDDYPVDLSVAGIWGLVRSAQTENPDRLVLVDLDDDDRSVAALPVALATGETQLAIRAGTILTPRL
BGC0001199.1	akaeolide1	M2	ER	MM	Streptomyces sp. NBRC 109706	Actinomycetes	WAALGGAEDGLIGSLRLPAFSHDAEGAPPEVVLWPVPLGAEVGSVPDRARAATLQALATLQRWLADERLTGSRLVVVTRRAVSTGPDDHPIDLGTAGVWGLVRSAQTENPDRLVLVDLDDDERSPAALPVALATGETQLAIRAGTILTPRL
BGC0001199.1	akaeolide2	M3	0DH-BKR	M	Streptomyces sp. NBRC 109706	Actinomycetes	LAELSFGEWSTIPEHVLYRVEPADPTTEAGQHLPDIARATVNHALTTVQRWLADERFQSSRLVVVTRGGISTGEGDPGGLAASGVWGLVRSAQTENPGRFVLVDLDDDGRSVAALSVALGTGEPQLAIRSGTVLVPRL
BGC0001199.1	akaeolide2	M4	EDH	MM	Streptomyces sp. NBRC 109706	Actinomycetes	LSPLLPDARTFADLASLSATLDEDATPPSCVLAPIAVPAMTDDQELPAAVRAVTVDALATLQRWLADERLTGSRLVVVTRRAVSTGPDDHPVDLGVAGIWGLVRSAQTENPDRLVLVDLDDDDRSVAALPVALATGETQLAIRAGTILTPRL
BGC0001199.1	akaeolide3	M6	0DH-B1KR	MA4	Streptomyces sp. NBRC 109706	Actinomycetes	WALLGPADADLTAALTAVAPVTTHPDLDALTRSVQEGEPTVILPLTSPTPADQPLPEAVRTHTLRTLDLVQRWLADDRLTGTPLVVVTRGGISTGEGDPGGLAASGVWGLVRSAQTENPGRFVLVDLDDDGRSVAALSVALGTGEPQLAIRSGTVLVPRL
BGC0001204.1	vstA1	M1	EDH	MM	Streptomyces versipellis	Actinomycetes	WAFLGADDVPGTYRDLAELRTALAAGAPVPDVVVAPVAAPAVAPVVDPAVIAASEEIPAEAHAAAHTAAHTALSLVQEWLADDRLADSRLVVLTREAMSVRPEDDAVSPVQAAVWGLLRSAQTENPDRFLLCDTDAGDGNSSGDTDTDAGIPAWAGSQLVPALTAALAVAEPQLALRADRTYVPRL
BGC0001204.1	vstA3	M10	0DH-BKR	M	Streptomyces versipellis	Actinomycetes	ASAPPISVHRLSAPPDTDPLTATHTLTHRTLALLQNHLADDTLTDTRLVLLTHGAIAATHGEDITDLAAAATWGLVRSAQNEHPDRILLIDTDHTDTPTPDTLTTLLTTGEPQLALRNGNTLVPRL
BGC0001204.1	vstA4	M11	0DH-C2KR	MM	Streptomyces versipellis	Actinomycetes	TPTPPPVIAHLTAPPDTDPLTATHTLTHHTLALLQNHLADDALADTRLVLLTHGAIAATDGEDITDLAAAATWGLVRSAQNEHPDRILLIDTDHTDTPTPDTLTTLLTTGEPQLALRNSNTLVPRI
BGC0001204.1	vstA4	M12	EDH	M	Streptomyces versipellis	Actinomycetes	GGSVGVDAGELRATVVEVAAPEAVSPAAAAHSVVHETLALIQRHVTGGDADASPLVLLTHGAIATTDDEDITNLPAAAAWGLTRSAQSEHPGRILLIDTDHTPTSHQNLTTTITNALTTGEPQLALRNGNTLVPRL
BGC0001204.1	vstA5	M13	CKR	M	Streptomyces versipellis	Actinomycetes	WLVVAAPGALEEEPGASVVAALAARGGRVVPLVVDPESSGGGESVSVLRAGLRARPEVDGVLSLLALSERRHPAFSAVTAGLAATVELLDALDDMGVRAPVWLATRGAVSVSSADVPAGPAAAQVWGLGQGPADGGAGRWTGLVDLPGVPDGRVADRLVDVLAGSRADDRVAVRGPGVFVRRL
BGC0001204.1	vstA1	M2	EDH	MM	Streptomyces versipellis	Actinomycetes	AGTITAAPVAVEIEVSDDAPLAVLDESSAPPAVVAHLSTPADTDPLTATHTLTRSVLALLQEHLSADWLAHTPLVLVTRGGVAAVAGEDVTDLAAAAVWGLVRSAQSEHPDRIVLVDTDGTEASRQALTVVLAGDEPQLALREGAVHVPRL
BGC0001204.1	vstA1	M3	ER	M	Streptomyces versipellis	Actinomycetes	ASTPPTAIHHLTAPPDTDPLTATHTLTHHTLALLQNHLADDTLTDTRLVLLTHGAIAATHGEDITDLAAAAIWGLVRSAQNEHPDRILLVDTDHTEASQHTLPTAITTALTTGEPQLALRNGDTLVPRL
BGC0001204.1	vstA1	M4	ER	MM	Streptomyces versipellis	Actinomycetes	SSAPPISVHRLSAPPDTDPLSATHTLTHHTLALLQNHLTDDTLTDTRLVLLTHGAIAATHGEDITDLAAAAIWGLVRTAQNEHPDRILLIDTDHTDTPTPDTLTTLLTTGEPQLALRNGNTLVPRI
BGC0001204.1	vstA2	M5	0DH-B2KR	MM	Streptomyces versipellis	Actinomycetes	IAVGTGDSQVNTEPDLTAVQDAVAAGDVAPDTIIVPISTADAAAEDDPVPLLHATAHRVLELLQRFIADEGFSRTRLVVVTRGAVATGPDAPVTDLPAASVWGLVRTAQAEHPDRVVLADLDDADASRDSFLTALAAAVAADEPQFALRDGDMLVPRL
BGC0001204.1	vstA2	M6	ER	MM	Streptomyces versipellis	Actinomycetes	ATAPTTATHHLTAPPDTDPLTATHTLTHHTLALLQNHLTDDTLTDTRLVLLTHGAIAATHGEDITDLAAAAIWGLVRTAQNEHPDRILLVDTDHTEASQHTLPTAITTALTTGEPQLALRNGNTLVPRL
BGC0001204.1	vstA2	M7	EDH	MA3	Streptomyces versipellis	Actinomycetes	LPSGGGWAALGNGSLPDLLGDDTASHPDLAALREAIAAGAPAPEAIVTHVDASAATADHSADDDPVGATHGLTHRILALLQDYLAADDLSQTPLVLLTHGAIATTDDEDITNLPAAAAWGLTRSAQSEHPGRILLIDTDHTPTSHQNLTTTITNALTTGEPQLALRNGNTLVPRL
BGC0001204.1	vstA2	M8	EDH	MM	Streptomyces versipellis	Actinomycetes	TLPTSPASAPTTAIHHLTAPPDTDPLTATHTLTHHTLALLQNHLTDDTLTDTRLVLLTHGAIAATDGEDITDLPAAAIWGLVRTAQNEHPDRILLVDTDHTDTPTPDTLAALLTTGEPQLALRNSNVLVPRL
BGC0001204.1	vstA3	M9	EDH	M	Streptomyces versipellis	Actinomycetes	TLPTSPASTPPTAIHHLTAPPDTDPLTATHTLTHHTLALLQKHLADDTLTDTRLVLLTHGAVAATHGEDITDLAAAAIWGLIRTAQNEHPDRILLVDTDQTEASQHTLPTAITTALTTGEPQLALRNGDVLVPRL
BGC0001212.1	ncyA	M1	0DH-B2KR	MM	Nannocystis sp. MB1016	Myxococcota	WIVLGDAGGTGAALARTLRGRGATCVELAPGAVDALPGLLAGGCRGVIHCGSLDAAPWAATTPASLAADLRRGTVAAIATARALLEAGLRDLPRLVLVTRGAQAIHTDAVAAAQAPLWGMARTLVLEHPELECLRVDLPPSPAADEVELLADTLLADDEETEVALRAVHDPRASGVKRPLTRFVARL
BGC0001212.1	ncyB	M2	EDH	M	Nannocystis sp. MB1016	Myxococcota	WVVVGGSPLAAALAEGLHDCVRTDVAGLPAALAELEAAQVLAVWDEAGDGAEAALRTATAGLAIVQATLGRAGRLWWVTRGAVAVADDEAVAVAGAPLWGLGRTLMQEHPELRCTLIDVADGEVDVARLLRELASSDGEDQVALRSGGRHVARL
BGC0001212.1	ncyB	M3	EDH	MM	Nannocystis sp. MB1016	Myxococcota	FLLLGAGGGLGAALRGLLEAAGHAVVHAVAGAPGAVPAGCWAFDDGHPAGLRALLADVFQGTGPTAVVHLRSLEGDDEVAEAGTDPTAVMHLRSLEDDGEVAETGTGPTAVVHLRSLEGDDEVAEALARGCDSALHTVQALVGVESRDAARLWLVTRGAQAVVGAPADVGQAPLLGLARVVAMEHPELRCARVDLDPARPGDEAALLVKELLADAAEDEVAWRGATRQVLRL
BGC0001212.1	ncyC	M4	OMT-AKR	M	Nannocystis sp. MB1016	Myxococcota	WLVLGDGDGLAATLRAALAEAGQTVVVAGAARVQSEVRARLADAFQGAAPTAVVHLGTLDAAGGADAVEAASQAAEEVLATVQALAGMRWRDPPRLWLVTRGAQAVAPGEEVAPVQAPVLGLGRVIATEHAELRCARVDLPTQRATDELEALTRELLADDAEDEVALRSGGRFVARL
BGC0001212.1	ncyD	M5	EDH	MM	Nannocystis sp. MB1016	Myxococcota	IVVLGDGGGLGAALCDALKTAGVAATLVSHANAAPPDPLKTAGVAATLVSHADATDLRARLADAFAGPPPTAVVHLRGLDAGDALEETATRFLATIRAAIGLGSAPRLWLVTRGAQAIERAGVKVGTPTAAVDLEVAPVMASIEGDVAVEQAAQLGLARTAALEHPELRCTCIDLDPARPAGEVQALLAELLGDELEQEIALRDGNRLLGRV
BGC0001215.1	congC	M2	A1KR	MM	Streptomyces conglobatus	Actinomycetes	WLLVVPADTAGHPWATGAADALRDHGAEVTTLECDGPTRAGLGERLRAACAGTAPAGVLSLLALDERPDADAPCVPRGLSGTLALIGALGDAEIGAPLWLATRGAVSVGRSDRLDNPVQAQVWGLGLAAGLEHPDRWGGLVDLPGAVDRRAAERLAAVVAGIGAEDQLAVRSSGVSVRRL
BGC0001215.1	congC	M3	ER	MM	Streptomyces conglobatus	Actinomycetes	LTVLDADGLGLADAGLPVTPPVALDTLTAAPDPLIACCPVRCDAATGADTAAAVRAATRWALELARTWSAGERFTSGRLVVATRGAVHTDLPDPAQAAVWGLISSAQSEHPGRFVLVDLDGDPASRRALPAALAGGEPQLALRAGAATAPRL
BGC0001215.1	congD	M4	EDH	MM	Streptomyces conglobatus	Actinomycetes	RILLGQDDLDLSAVFAAGGVKTDRLRDLDDAAAAIEEARAGTPTVVLASFGSGTAGTQPSDLAAAARSVAGRALPLLQRWLADERFADARLALVTRGAVATQRAEDVTDLAHSALWGLVRSAQSEHPGRILLVDLDESTASCERLPGVLAGDEPQAALRGGEVRVPRL
BGC0001235.1	antA	M1	AKR	M	Polyangium spumosum	Myxococcota	WALVGAPEELGLEPAGVTLDRHPDLAALIAALDRGASVPDAVVVPWRSRGAAAAPADVIAGAHEATARLLAQLQAWLADERLASSRLVVLTRGAVAARSGEDVPDLVHAPLWGLVRSAQSEHLDRSILLVDSDDTEASREVRFTGGDAAETQIALRRGTCLVPRL
BGC0001235.1	antA	M2	0DH-B2KR	MM	Polyangium spumosum	Myxococcota	WIILRDAHGTGAGLSQALRARGEACIEIDAAEPGELSRLLAGACRGVVHCGSLDSAPRAETTPATLEADLRRGAHAAVVLAQAIVRRAFRNPPRLILVTRAAQAMGTGPVSAAQAPLWGLSRAAAMEHPELEWTCIDLPAVPLSGEADLLARELLAGDGEEQIALRAEGRFVARL
BGC0001235.1	antA	M3	EDH	MM	Polyangium spumosum	Myxococcota	WLLLGGGELGASMRAALEAAGHQAVHAAIPEDAAGARALFGAAFGGQLPTGVVHLGNLEAGGELDTDAIETALARGCDSVLATVQALAAAADRDLPRLWLLTRGAQPLGGGPRHRVAAAQAMALGLGRVIAAEHTRLRCARVDLDPDRPAGEIDAVLAELLADDAEDEVAWRSGERHVARL
BGC0001287.1	cxmE	M10	ZDH	M	Streptomyces leeuwenhoekii	Actinomycetes	WVAVADAEQVATLADDVLSGAAAPTAAVLEAVGGPGSDVLALTTRVLDAVRVWLDGGGLEESRLVVVTRGAVAAGDGAVTDAAGAAVWGLVRAAQAENPDRIVLLDLDADRSVDDVLGSVLACAEPQVAVRGTTLSVPRL
BGC0001287.1	cxmE	M9	EDH	M	Streptomyces leeuwenhoekii	Actinomycetes	WHPVTSADELPSGIAVLEASGGQESPLSLTSRVLAVAQAWLAGPALEDARLVVVTRGAVAAGDGAVTDAAGAAVWGLVRAAQAENPDRIVLLDLEADRSVDDVLGSALACGEPQLAVRGTTLSAPRL
BGC0001288.1	makA1	M1	0AT-0DH-CKR		Micromonospora sp. GMKU326	Actinomycetes	LPVTDLANLDALLAGEAPPPEVVVVAATAPAGDPVAATHELTERVAAALRDWLADERLHASRLVVLTRGAVAARPDDDVTDLPAAALWGLVRSAQSEHPDRVTVIDADEADPRLVAAAVATGEPQLALRAGALLAPRL
BGC0001288.1	makA3	M10	ER	M	Micromonospora sp. GMKU326	Actinomycetes	IALVGPATIPDGGTDLRYDSLAALDEALAAGTPPPDVLAFAAPTGTGPDVPAGAYESVRQVLDLLRSGLADERYPDVRLLVLTRGAVPAAPGETVDDLGGAACWGLVRTAQSEYPGRVLIADLDGRASSWRALPAALATDEPQLALRDGEAYAPRL
BGC0001288.1	makA3	M11	EDH	MM	Micromonospora sp. GMKU326	Actinomycetes	PPAVGLDDLVASLAAAEPVAETVLVRATGPDATGDPLAVHEVVERTVTAFQAWLADERTAESQLVVLTRCAVAARPGDPVADLAGAALWGLVRGAQVEHPDRFVLVDTDDHPGSVAALRAAVATGEPQLAVREGTLLAPRL
BGC0001288.1	makA1	M2	0DH-BKR	M	Micromonospora sp. GMKU326	Actinomycetes	WPVIALDEAVALLGTDAAVPDVLVVAPTAPEPGVAGAHAAVEQAAALLAAWLADGRTERSRLVVLTRRAVGTRPDEDVQDLAVAPLWGLLRSAQSEHPDRIVIVDHDGAPASLDLLPAAVAGGEPQLALRDGAALAPRL
BGC0001288.1	makA1	M3	EDH	MM	Micromonospora sp. GMKU326	Actinomycetes	PDPVDAAGLAGLLADDVPVPPLVVLAVPAATGDVVAATHRQAEQVARLVQDWLADERCAASRLVVLTGDAVGTDPAENVTDLPAAALWGLLRCAQSEHPDRFTLVDSDGTADSVAALGAAVATGEPQLAVRAGRVLVPRL
BGC0001288.1	makA1	M4	EDH	MM	Micromonospora sp. GMKU326	Actinomycetes	PPVLDLAGLADMLAADTTPELVIVAPAGGTDGGPAATHDLVTRTTAALQKWLADERHAAARLVVLTSGAVATGPDEDITDLAASALWGLVRSAQVEHPDRFVLVDADRPAALGPALATGEPQLAVRDGKLFVPRL
BGC0001288.1	makA1	M5	EDH	M	Micromonospora sp. GMKU326	Actinomycetes	TYPTFGPADLLAALADGTAPAGTVLLRPDPIDGDVPAGTHRTAEQVLAAVRGWLDDGSGRLVVLTRGAVAVGDGDDVPDLPGAALWGLVRAAQSEHPDRLLLLDHDDDPGTLAALPALVDAAAAAGEPQLAVRDGAARVPRL
BGC0001288.1	makA2	M6	EDH	MM	Micromonospora sp. GMKU326	Actinomycetes	GAYDLEVFPTGAVEELLAAPWNAPDVVVWSPGADGDVVAATHAVVAEVVRVVGAWCRNADLADTRLVVLTCGAVAAHDGEDVADLAGAAVWGALRSAQTEHPDRFALVDTDGTPESGELLSVAVESGAAQAVLREGRLLRPRI
BGC0001288.1	makA2	M7	EDH	M	Micromonospora sp. GMKU326	Actinomycetes	LLSPAELAALLDDDGRPAPETVLLRATGDGGEPVAATHQRVEEVLGLLQRWLADDRSAATRLVVVTSGAVAARAGDEVTDLAGAALWGLVRSAQAEHPDRFLLVDADEVRDERLAAAAAAGQPQLAVRDGELLAPHL
BGC0001288.1	makA2	M8	EDH	M	Micromonospora sp. GMKU326	Actinomycetes	ALDLADLTAGAVPDDAELVVVRIEPAGDGDVVTATHDLTEQAVTALRGWLADDRYATGRLVVLTRGAVATRSGEDIDLPSAALWGLVRSAQSEHPDRIVLVDVGPAGNGPLGTAGNGPLGTAGNGPLDTAGNGPLDTAGNGPLDTAADDLIVAAVATGLPQLAIRDGGLLAPRI
BGC0001288.1	makA2	M9	ER	MM	Micromonospora sp. GMKU326	Actinomycetes	WAALGAVPSGLGAPVDAYPDLAALTTALAGGADVPEAVLVVADPDGAPGADLARAATHRALDLVRTWLSEPELAGSRLVVLTRDAVAARPGDTAAALAAAAVWGLLKTAQAEHPDRLVLVDLDGHAASAPALAAALATGEPQLAIRRGAVHAPRL
BGC0001293.1	cycF	M1	EDH	M	Streptomyces sp. NCIB 11649	Actinomycetes	WVLIGEGVGAGLPKVPVHRGLGGLGDDVPDVVLFDARGGQNGSGADEDHVVADVHAALARTSGFLRSWLEDERFSASTLVVVTGGAVAVGEGDVPNLSTAPLWGLVRSVQAEHPGRIVLLDVDEHAATPAAVAAAVAGGEPQLAVREGSVLVPRL
BGC0001293.1	cycE	M2	EDH	MM	Streptomyces sp. NCIB 11649	Actinomycetes	LTAAETATLFAADDVLNGAEPGDGVVVLDVPATPGEPLSATRTAVHRVLDVLRRWLTEELCAESTLAVVTHGHLDADPAASAVWGLVRSAQSEHPGRIVLVDAVSEAGPPTNLTTLVPAALALGEPQLALRSDEVLVPRL
BGC0001293.1	cycE	M3	EDH	M	Streptomyces sp. NCIB 11649	Actinomycetes	VVVLDAGDVSHTGDDEEASGSGAPADVPTVVRAATAQVLDLLRRWLAAPHLEGTRLVVRTTGAVAVEPAESPDLVTATVWGLVRSAQSEHPGRIVLVDGEKGTETDLASVLSSDEHQVAVRGGRLLRPRL
BGC0001293.1	cycC	M4	0ER-0DH-B1KR	MM	Streptomyces sp. NCIB 11649	Actinomycetes	ALTVADTVAQDGPVPDFLLLAPDVSGADVLAATHSAARSVLARLQAWLADERFGSARIAVLTSGAVAVDDGEDVDPAAAAVWGLVRSAQAEHPDRIVLVDGEPGTEPDLSAVLAAATAAGEPQVAVRGGAVRVLRL
BGC0001293.1	cycC	M5	0DH-CKR	M	Streptomyces sp. NCIB 11649	Actinomycetes	DETLSGLVVLELDGSGDSEPLVAARKLVEQVVDRLQHALETGERLVVVTRGAVSTGPGETADPAGAAVWGLLRSVQLEHPDRVVVVDVEPDTEWQPGPLPDGEPQLAFRQGRMLAPRL
BGC0001293.1	cycB	M6	0DH-BKR	M	Streptomyces sp. NCIB 11649	Actinomycetes	AANVLVRPVPPALPDADPVAAAHTAALNALALVQEWLADERQAETRLIVLTAGAVPVEEGAPVDVTHATVWGLLRSAQAEHPGRLVLVDGETGSEPERRDVLAAAELGEPQVALRGGRAFVPRM
BGC0001296.1	stzD	M1	EDH	M	Streptomyces sp. MSC090213JE08	Actinomycetes	WSEAHDSFDSVPADDVVVVRVPGDTDGAGAPAPAARRVLRLVREWLAEERFAGSRLAVVTRRAVAARSGDDVDLAGSSVWGLVRSAQSEHPNRILLIDVDDDADFGGADDAAAGSLLSAATAVDEPQIAVRDGRLLVPRL
BGC0001296.1	stzD	M2	EDH	M	Streptomyces sp. MSC090213JE08	Actinomycetes	DSGASEVLDIISGGRNPREVTRDTLHAVQEFLTDDTKHNTTLIVVTHGAIAVGNEDITDLPAAAVTGLIRTAQTENPGRIILADTPTDTTLDPATLLATGEPQLAWRNNTLHTPHL
BGC0001296.1	stzC	M3	EDH	M	Streptomyces sp. MSC090213JE08	Actinomycetes	DSGASEVLDIISGGRNPREVTRDTLHAVQEFLTDDTKHNTTLIVVTHGAIAVGNEDITDLPAAAVTGLIRTAQTENPGRIILADTPTDTTLDPATLLATGEPQLAWRNNTLHTPHL
BGC0001296.1	stzC	M4	CKR-0DH	M	Streptomyces sp. MSC090213JE08	Actinomycetes	WADLGAGEATGTGYAALAEAAEAIAAGAPVDALRVWVRTEADADVLDALHTRTGEVLALVQDYLADERLAAVPLAVVTRGAEAAWPEGAGAVGAAVRGLLRSAQAEAPGRIFLFDVSDAPDVPDVRDVPDGERGTGGERGTGGLDALLSAVIAAGEPQADVHGGGIRLPRL
BGC0001296.1	stzB	M5	EDH	M	Streptomyces sp. MSC090213JE08	Actinomycetes	FAFLGANGSGTTLDEAAALAERGEIDAVVFREPGPDGPVGEVVPALHARTRALLDLVRRWMAEDGAGTVPLVVVSRNAVATGGEPAVDPVGAAVWGLLRSAQSESPGRVVLVDVDSDDAGALADPLSRAVASGAAQAAIRGGQVLLPGV
BGC0001298.1	Ann4	M1	EDH	M	Streptomyces calvus	Actinomycetes	WIRLGETPHADIAALRAAVDAGTAVPEFVVIGEQELVAGTTGDVLDRTHATAARGLEAVRDWLAAPQFAESRLVLAVPDGALHTAPLVGLIRTAQTEQPGRLVLAHVDEDGPELLPAVLATGEPEVAVRDGELFVPRL
BGC0001298.1	Ann4	M2	EDH	MM	Streptomyces calvus	Actinomycetes	WAVLDDSDSGRRPLPAPLGSSSDLAGIVGTPPLVVVPFPGEDGPGAVAHRALRLAQEWLAEERFADSRLVFVTRDATTARTEAGLGATPVWGLVRTAMAENPGRFGLLDLTDWDVSEAELGRALAVPDAQVSLRDGALLVPRL
BGC0001298.1	Ann4	M3	EDH	M	Streptomyces calvus	Actinomycetes	VVLGEADLGLAAEHHADLAGLAASSADGADAPDVVVLPVRPATVQETGRITEEVLAVLRQWLAGDAPAGARLAVLSTGELAHSALSGLMRTAASEHPGRFQHVITDGAPARGELLAAALSDPRPQLELHEGRAYVTRL
BGC0001303.1	lobR	M1	EDH	M	Micromonospora sp. RL09-050-HVF-A	Actinomycetes	WVVLGDERIGAATRHADPAALGAAIDAGATAPEFAFVGVGTGDVRAATAGALTLLQQWLADARLGGTRLVFVSRVDDLATEAVWGLLRAAQTENPDRFVTVRLADAPTSLLAAALATGEPELRLRDGEISVPRL
BGC0001303.1	lobD	M10	EDH	M	Micromonospora sp. RL09-050-HVF-A	Actinomycetes	WWCCAPEAPTTYTPRCTGCWGSPSAGWPGRTAPRSSSLPGTPSVTTMTDLAGAAVWGLLRSAQAENPDRILLVDADTDRLDDILPAALAAGDPQVSIRDGIVRVPRI
BGC0001303.1	lobE	M11	EDH	M	Micromonospora sp. RL09-050-HVF-A	Actinomycetes	WALVGVDEFKVAAALDTVGLLAETHPDLTALTVTLDAGGTVPDVVLVASVQPDSRDLAAGARHTTGQLLTLLQGWLADERLASSRLLVLTHGAQGDRVTEPAAAAAWGLVRSAQSENPGRIVLVDLDDHDGSAQLLPAVLAGGEPQLVVREGVAHAARL
BGC0001303.1	lobR	M2	EDH	MM	Micromonospora sp. RL09-050-HVF-A	Actinomycetes	WAHLEDLADDVPELVLARLTHQDAALDPATTAGPVGDVEVAGRAAVGAALALLQRWLADPRLAESRLVVLTDGAADQVTDLAHAPVWGLVRAAQAENPGQFVLVDADPETPVEEILAAVGTGEPELSLRDGQVRVPRL
BGC0001303.1	lobR	M3	EDH	MM	Micromonospora sp. RL09-050-HVF-A	Actinomycetes	WGYLEGLGLGVPDVVLAPLTPPAADLDPATAARTAVGETLTLLQSWLADPTQAAARLVVITDGAVDGGTDLAHAPVWGLVRAAQAENPGQFVLVDAVPETPVEEILAAVGTGEPELSLRDGQVRVPRL
BGC0001303.1	lobR	M4	EDH	M	Micromonospora sp. RL09-050-HVF-A	Actinomycetes	TVVLGDDDLGLGVPRYADVGTLAAEVARTGDAPGTVAVAWRTTSDSPSAATTAALALVQGWLADERFTDTRLALVTTRAVATTDGEDVPRPVDATVWGLVRAAQEENPGRLVLIDVDDPDPTGLRSALAVDAEPQLAVRRGGLLAPRL
BGC0001303.1	lobB	M6	AKR	M	Micromonospora sp. RL09-050-HVF-A	Actinomycetes	WWLVTPDPLTDDPRITAIADALATRGATVTKLTGTDLLPGTDPLAGRGTPSGIVSLLGLDDTPDPYDAGLSAGVTGTVRLVQALAAADITGRLWCLTTGGVAVDRYEDLPHAAQAGLWGLGTVLSLDYPGWWGGLVDLPADWTPDILTRLVDVLADGSEDQVALRTAGVLARRM
BGC0001303.1	lobB	M7	AKR	M	Micromonospora sp. RL09-050-HVF-A	Actinomycetes	WWLVVPAASTGDERLTALAAGLADRGADVVTVTGTDLPAGDTPAGVLSLLALDDTPDPTDAGLSVGVTDTVALIQALTATDFAGRIWCLTAGGIAVDRFEDLPHPAQGALWGLGTVLSLEYPHSWGGLVDLPTDWTDEHVARLADVLASGAEDQVAVRTAGVLARRL
BGC0001303.1	lobC	M8	A1KR	MM	Micromonospora sp. RL09-050-HVF-A	Actinomycetes	WWVVAPATLADDERLRTLADGLTARGAEVVTVTGTDHAGREAPAGVLSLLALDDGPDPLGVGLSAGITATVSLVHALAASDFSGRLWCVTAGGVGVDRFEPVADPAQGALWGLGTVLSLDYPGWWGGLVDLPAEWTPQTVDRLADVLTGGGEDQVALRAAGTLARRM
BGC0001303.1	lobD	M9	EDH	M	Micromonospora sp. RL09-050-HVF-A	Actinomycetes	WAYHPAVPATGTAPVPADPAAPAGRVAPAADAGAQGPATSTPELLVLTAGGAGDVTGPEAVHDEVNRVLGLVQEWLAGPDTHRLAVLTRRAVGDDGTDPTGAAVWGLLRSAQAENPDRLLLVDTDPDADVSGSLTVAVATGEPQVRVRDGVVSVPRL
BGC0001348.1	HbaAIb	M1	B1KR	MM	Streptomyces varsoviensis	Actinomycetes	WLAVVPQQSEPSGPAGGHASDAVAAVLAALTAAGVGLAVVTATGPGATREELSAALSEAVSAASAASAATAATTASAVDGAGVEGGDGADKADDREPVAGVLSFLAWEERVHPEHPGLPGALALTLALAQALGDAGVEAPLWLLTSGTAVVGGAERPGAPAHAAVAALGRTVALEHPQRWGGLIDLPAAALDERAARRLCAVLAGAAAADEEQVAVRSTGVHGRRL
BGC0001348.1	HbaAIV	M10	EDH	MM	Streptomyces varsoviensis	Actinomycetes	WAAIGGANDGGDLFPDSHPDLASLAAAVDKGMPPPSVVVVPCMEQGADAPSVRAALHRVLALTREWLADPRWEDARLAVLTSGAVATGRGDRLTDLAAAAVRGLLRSAQSEHPGRFLLLDADDPAAVADRLPAALASDEPQLALRGGELLVARL
BGC0001348.1	HbaAV	M11	EDH	MM	Streptomyces varsoviensis	Actinomycetes	WGILGPRDERLLPPEFATEPLPTGPADARVVPDAVLLLCAPPSAEGDGLADPEAVHAAAADALTRIQGWLADDRFADTPLVVLTRGAADAGDEPVEPGAAAIWGLLRSAQLEHPGRFLLLDTDEPRDTTAALPTVLAAAEPQTALRAGRLLTPRL
BGC0001348.1	HbaAIb	M2	AKR	M	Streptomyces varsoviensis	Actinomycetes	WLLVVPEDGATGSAGPGCAGLALACEEALVRHGAEVSVLRVAAGTGRAELAGLLPADRSDVVGVLSLLAFADAEAHADAHADVEDGRSAFGSDAPSAPLAATLTLIQALGDRELNAPLWCVTSGAVAPVGPDAASAHVATAPEAPVLPDGSAVGPYEPALTDSAPTDSVPIDPVQAQIWGLGRVAALELPRLWGGLIDLTGALDGGELEDGALDGMCAVLGGADGEDQVAVRGARLFGRRL
BGC0001348.1	HbaAII	M4	A2KR	MM	Streptomyces varsoviensis	Actinomycetes	WLVLSSAADAEDPRSAGCLRALATAGAVTLRLLLTEADTDRATLAARLAETVDAVGGPVAGVLSLLGLDENPHPVHTTVPMGTALNLALAQALGDAGVEAPLWWATRAAVATGPDDGPVSAAASLLWGLGRVAALEYPRRWGGLVDLPDTLDDATAARLCRTLAGGLGDEDQVAVRASGCHGRRL
BGC0001348.1	HbaAII	M5	B1KR	MA21	Streptomyces varsoviensis	Actinomycetes	WLVAVPATAADGPTATACVRALAAHGARPVLIAADREAADRGRFAALLPDGLAAEAPSGVLSLLALDESPYAEGSAMPTGLVLTVALLQALGDAGLDAPVWCATQGAVSIGRSDRLRSATQALAWGLGGVAGVEYPQRWAGLIDLPEHLDDRALARLAEALSGIGNGTGPTAGSDGDADGEDQLALRASGVFARRL
BGC0001348.1	HbaAII	M6	EDH	M	Streptomyces varsoviensis	Actinomycetes	WATLGADAPWWQPTPARTAPDLAALAAQIDAGAPTPRLVLATCPPAAGDGTGADADAVRAAVADVLALLQQWLADERFATAKLAFVTSGAVAVDAGDDVGDLAHAAVWGLVRTAQTEHPDRFVLVDLQGHAGHDDAPGALPGALATGEPQLAVRAGAAYAARL
BGC0001348.1	HbaAIII	M7	EDH	MM	Streptomyces varsoviensis	Actinomycetes	PVTDLASLVADVDAGAPVPGTVLLDCETGDLTAEAVRRVVHRALADVQTWLADDRFAGSRLVFRTRGAVGAGSDVRNPAQSAVWGLVRSAQSEHPGRFALLDLDPDDPAGTSPGAAAALASGEAQSAVRGAEVRVPRL
BGC0001348.1	HbaAIII	M8	ER	MM	Streptomyces varsoviensis	Actinomycetes	WAALDGAVPGADAWPDLAALSAAIGSGLPAPGTVVATVPTTGSPSDPSDPSDRIHATVRDGLALVQQWLHDERFSGSKLTLLTRDAVRTGPADRPADLAQSALWGLVRSAQTEHPGRFVLVDLHPADTAADVLPAALAADEPQLAVRAGELLVPRL
BGC0001348.1	HbaAIV	M9	A2KR	MM	Streptomyces varsoviensis	Actinomycetes	WLVITPAGRTADDRVRGPLQALAALGVDVLPVELTADDVRRDALAAKLTAALAGRTPAGVLSLLAADARPHPRHPALPGGTALTVALVQALGDLRIIAPLWCATNGAVSTGPTDPVTDPGQALVWGTGMVAALETPARWGGLIDLPDRLDDRARARLGAALAGAAGPGEDQLALRATGLLARRL
BGC0001349.1	HerF	M10	EDH	M	Streptomyces sp. SCSIO 03032	Actinomycetes	WRAGGGDARAALHAALDALRTEDGTLAVLTRGAVRVADEDVTDLAGAAVWGLVRSAQSEDPGRFVLIDVADDAGADADDEQEHAEAVALALATGEPQVAIRNGQAYAPRL
BGC0001349.1	HerG	M11	EDH	M	Streptomyces sp. SCSIO 03032	Actinomycetes	DGLDDIEGLTGPVPATVALTLPAGTGDTAADVRAVTGLVLRALQTWLADERFADRRLLVVTREDDLAHAAAWGLVRAARAEDPERFALLGTDASARQDPAEAIARAIASGEPELRVTDGQSLVPRL
BGC0001349.1	HerA2	M3	EDH	M	Streptomyces sp. SCSIO 03032	Actinomycetes	WAFLGTDHIGVTGALKAIRRPLDTHPSLGALDLALRNGAPAPDVVIVSCTDEEAPVRSAAQRALVLVQEWLADRRLAGTRLVLVTRGAVAARAQEDVPDAPGAAVWGLLRSAQSEHPGRFVLVDVDDPEDGSHALLAAVASGEPQLAVRRGALFRPRL
BGC0001349.1	HerB	M4	EDH	M	Streptomyces sp. SCSIO 03032	Actinomycetes	EPDAAAEEFTLAFLPDAFPGTPADAARAATLHALGLVKDAVREDTKLALVTRGARQDMALAPAWALVRAAQAEHPGRFVLIDLPAGGAEVPDRALRAALATGEPQLALDGDAVLVPRL
BGC0001349.1	HerB	M5	EDH	MM	Streptomyces sp. SCSIO 03032	Actinomycetes	RRAAVHRGPAGTTAAEVHAATASALAALTDWLAQDAGGEGPLAVVTRGAVSTAGEEVTDLAGAAVWGLVRSAQSEHPGRVVLVDLDPAESAEGQDTDGAAADAALDLALATGEPQIAVRSGTPLRPRL
BGC0001349.1	HerD	M6	EDH	M	Streptomyces sp. SCSIO 03032	Actinomycetes	AAEPPSEAEVTVHRVPPTNGGTPAAVRAATADALAAVRAALDGDTTLVVVTEGALDGSDLGHAAVAGLVRAAASEHPGRFVLVDADGPVRPRDLLATGEPELRVTGGEILAPRL
BGC0001349.1	HerD	M7	ZDH	M	Streptomyces sp. SCSIO 03032	Actinomycetes	HEVPRAEGDTPAAVRAALNAVLDRMREWLADASGEERLAVVTRGAVAVGDEAADPRQAPVWGLVRAAAAENPGRFVLLDLAEGDPVPPLVDEPELAFRDGRLFVPRL
BGC0001349.1	HerE	M8	0DH-BKR	M	Streptomyces sp. SCSIO 03032	Actinomycetes	AAATAPGEHVVWTCPPPADAGPEASRALLREAFSVIQAWPADERAATARLVVVTRGAAEGHDLGHAAVWGLVRAAEAEHPGRFQLIDLDPAAGTEVPDEALRLAEPELAVRGGEIRVPRL
BGC0001349.1	HerF	M9	EDH	MM	Streptomyces sp. SCSIO 03032	Actinomycetes	AEVFRVPEGGEVRAAVNATLDALQAAGSRLVVVTRGAVSVHGEDITDLAAAAVWGLVRSAQTEDPDRFFLVDLTGVPGAQEQDALARALATGEPRVAVREDVVHAPRL
BGC0001359.1	gonP1	M1	A2KR	MM	Streptomyces caniferus	Actinomycetes	WLVVVPDGYEDDALVSGVREALEEAGARTHALTVDDGVELVELLRAESAPYAGVLSLLALDERPDRTHPCVPTGLALTLALLQALGAAGIGAPLWCVTRGAVATGSSSAEDSGPVHPDQAGIWGLGRVAALEHPERWGGLIDMPAGAGGQPAVDRRATALVTRILAAGDDEDQLAVRGSALFGRRL
BGC0001359.1	gonP4	M10	AKR	M	Streptomyces caniferus	Actinomycetes	WLVVVPEGLADSDWASSVVEGLVACGVQVERVGCGRDVDRVALAERFAGFEGDAVAGVMVLSGGVEGESSGGAPTSVWWTAVVVQALGDAGVGGRVWCVTRGAVAVGRSDGGPDPVGSAVWGLGRVAALELPDRWGGLVDLPGTLDRRAFDRLVGVVADGDEDQVAVRASGVFGRRL
BGC0001359.1	gonP5	M11	BKR	M	Streptomyces caniferus	Actinomycetes	FLAVVAAGDAYAEAVVAGLAACGVTVERVEWAAGEWDRGLLAARVRAVAGAEPVAGVVAVGAAEAVRTAVVVQALGDAGVSGRLWVVTRGAVATGRSDAGPDPVQAAAWGVGRVAALEHPDRWGGLVDLPEAVDRRALDRLAGVLAGGGEDQVAVRASGVFGRRL
BGC0001359.1	gonP5	M12	AKR	M	Streptomyces caniferus	Actinomycetes	WLAVMTPGEVWSEAVVAGLSECGVAVARVEYVAGEVDRGSLAERVREVAGEDPVAGVLVVGAADTVGAAMLVQALGDTGVAGRVWVVTRGAVAVDESDGGPDPVQAAVWGLGRVAALELPDRWGGLVDLPEAVDRGVLDRLVGVLASGAEDQVAVRATGVFGRRL
BGC0001359.1	gonP5	M14	B2KR	MM	Streptomyces caniferus	Actinomycetes	WLLVAPAPTSEDAAGRVAAVQDALTAHGARVRLVGLTPEDGGNRERTAARLREELGDDDLTGVLSLLPLDEQAHPDHPAVPLGLSATLSLVQALGDLDIGAPLWCGTRGAVAIGRSEFVTHTHQALVWGMGRVAALEHSDRWGGLIDLPETLDKRAADRLCALLADPDGEDQIALRGSGAYGRRL
BGC0001359.1	gonP5	M15	ER	M	Streptomyces caniferus	Actinomycetes	WAVVGDLALAVALDDTGVRVEATDSLSELADEVPPVVLVSATRTDDPSDAAAEAHTAAHDTLALLQTWLADDRFAASRLVILTHGAVSTSDADHPDPAQAAVWGLVRAAGVENPGRFTLLDLDGTAASTAAVPGALASGEPEAAVRAGALHVPRL
BGC0001359.1	gonP1	M2	A1KR	MM	Streptomyces caniferus	Actinomycetes	WVIVVPADHLDDDLVRVTSHGLGDRARILPVSPTADRAELVAQLAALHGDADTPLHVVSLLALDDRDADGHRGVPSSLLSTLALTQALAETERKARLWAVTQGAVSTDATARGPETHEVSDPIRNPGQAAIWGLARVFGLDHRDRWGGLIDLPGTLDEHASRRFLALLGGDGGSEDEYAVRPSGVHVRRM
BGC0001359.1	gonP2	M3	A2KR	MM	Streptomyces caniferus	Actinomycetes	WLVVVPADHVDDDLVRATLQGMGDSGAETVLLVLEESTTDRQGVADQLRDSFTTGAPSGVVSFLALDERPLTGHPEVTVGLAQSVALMQALLATEAEAPLWLLTTESAATGYADDAVRHPLQAAVWGLARVFALEHPKLWGGLVDLPAALDDHGAALLSGVLAAGGQEDQLALRGSALLTRRL
BGC0001359.1	gonP2	M4	B1KR	MM	Streptomyces caniferus	Actinomycetes	WLVVIPDGHQDAPVAEGVVRALRAGAADIRTLTVGVVDGDRERLAGRLRDEAGKAAGGIAGVLSLVALDEQPWAATQSLPAGLVLMTSLLQALGDAGIDAPLWCATRGAVSVNRADALDHPTQAMAWGLGRIAAFEYPQRWGGLVDLPREWDDRAGRRLVALLAQNPGEDQWALRGSGVFTRRM
BGC0001359.1	gonP2	M5	EDH	MM	Streptomyces caniferus	Actinomycetes	YAVIGTDVPQAPGDHIARHPDLAALIAAVDAGAEVPATVLIGSLPAEGDPAEATRRAVHHALEVAQAWLNDERFSASRLVLCTRDAVADRAGAPVPGLAQSAVWGLIRTAKAENPGRFALLDHDGTARSAAALPAALATGEPEIALREGGARVPRL
BGC0001359.1	gonP3	M6	0DH-BKR	M	Streptomyces caniferus	Actinomycetes	VAVLGAEGAGADADAPPFHGELNALAAAVEQGADAPDLVVVPWRTAEVAPVAESGEPADAAHTSAVHALTLLQVWLALPGLAGARLVFLTRGAVATGPDETVTDLPAAAVWGLVRSAQSENPDRFLLVDTGTDTRTGVDTEAPAPDAHNTDVLPAAVVGAAMGAGETQLAVRGTHLLVPRL
BGC0001359.1	gonP3	M7	ER	M	Streptomyces caniferus	Actinomycetes	LLVLDSAELAADLDGAGLAATRLTGTDLQNATGTVLVALPAPDPHEAAIGALAWVQRWLAEPPVAARLVFVTRGAVDAPGTTHHDSAAAPIWGLVRSAQSEHPGRFVLADLDGQDASYAALPAALATNEPQFAVRGGTVHLPKV
BGC0001359.1	gonP4	M8	BKR	M	Streptomyces caniferus	Actinomycetes	WLLVVPAEGPEDHQPVVDALTTALAGHGATVTTVNLPPDADDLAQRIEEAGGRDPDGINVLSLLGLGTARDPHHPEAPAALVLTSALLQVLVGADTPVRLWSATRGAVSIGRSDRLSAPGQAALWGLGRSAAIEHPDHWTGLVDLPERLDARALERLCAVLHSPRHDTGNGKEFALRASGLFARRL
BGC0001359.1	gonP4	M9	0DH-0ER-BKR	M	Streptomyces caniferus	Actinomycetes	LVDLDELGSAPGDDIPSFVALRLDTATGESAATAEAARAVTYRALAGLQQWTDSERYSAARLVVVTRNAVPAELQHPDPAQATVWGLVRAARVEHPDRFVLVDVDGTEASLAALPTALASGEPELALREGTAYLPRL
BGC0001359.2	gonP6	M16	AKR	M	Streptomyces caniferus	Actinomycetes	WLAVVDPDEVWSEAVVAGLAGCGVTVARVECVAGEVGRGSLAERVREVAGEDPVAGVLVVGCAEVARSAVVVQALGDAGVGGRVWWVTRGAVAVGRSDGGPDPVGAAVWGLGRVAALELPDRWGGLVDLPETLDRGAFDRLVGVVADGGEDQVAVRASGVFGRRL
BGC0001359.2	gonP6	M17	ER	M	Streptomyces caniferus	Actinomycetes	AAVDACEGAAGRLDLSAIGAAGYPDLASLPQDGVPSHVLLRLDAPGGDPAAAAHTATHRALTLLQAWLAEERFAAARLVVVTQGAVTVDERRPDPALAAVWGLVRSARSEHPDRFTLVDLDGASESLAALPAALTGDEPELAVRAGQVYVPRL
BGC0001359.2	gonP6	M18	BKR	M	Streptomyces caniferus	Actinomycetes	WLLAFPAGRDGRAWETALAAGLTAHGAAEVIPVEIDCGRADRGSLAGQLGTLLGGSGPVDGVLSLLATHEEPHPGRPATPGGLAATLALVQALDDLGSAAPLWCATTGAVAVREREAVPSPVQAAVWGFGRVAALEQPQSWGGLVDLPAEPDERAVERLCAVLEAGPGEDQVAVRDSGVFVRRL
BGC0001359.2	gonP7	M19	B1KR	MM	Streptomyces caniferus	Actinomycetes	WLMVTTGEDSLVNGLAEAISAAGAHLVTVPVDPEEDRAALAGTIAEALRGTASRDEPLPPVTGIVSLLALEEDDHSAHPGLPRGFAAGVALVQALDDLGVDAPLWFATRGAVATDPLRGVTAPHQSLVWGFGRVVALEAPERWGGLLDLPETLTPAGARLVVRALAGIGDEDQIAIRPNGVLARRL
BGC0001359.2	gonP7	M20	EDH	M	Streptomyces caniferus	Actinomycetes	WVVLGGPSGAASGRPVDAGIAEALDGAGVHAESYADLEALSAAVAMGMTMPDTVLLECTPQDGADTPGIRELLAGVLAVCRHWLADERFAGSRLVIVTRGALAAGPGEDVSDLAGAALWGLVRSAQLEHPGRLWLLDVDHHEASRGVLADAVAAAHPQVVLRAGELRLPQL
BGC0001367.1	hlaA	M3	EDH	MM	Haliangium ochraceum DSM 14365	Myxococcota	WLLVGDGDGLRDRLAESLRSHGHTLVAEGEPHDEIVWLEALDADRDGPEAARVACVTLMERVQRLVQESEHTPRLWLVTRGACEAQGCLVDPAHAAVFGFARSLAAEHAELRPGRIDLDPGLAPVAQAAELTRALLAGDDEDETALRGGARFVGRL
BGC0001381.1	nbrK	M1	A2KR	MM	Nocardia terpenica	Actinomycetes	WLLLVPEASDGDEIDSVATPLAAVTGAAVHRVVAGEAAERLAEVVRVERPDVVVSLLGLRRTGGASAVSPVLAETVGVVRALASVGGEARLWCVTRGAAAVTEALDGTAVLDGGPDPYAAQLWGLGRVAALEYPDRWGGLIDLPVISVPPVDPEAEAEVWARRIVGAVTRGDGEDQVALRDEGVFGRRL
BGC0001381.1	nbrG	M10	BKR	M	Nocardia terpenica	Actinomycetes	WLVLTSGAAHQEQTIAVLRAAGLPLRTSAIDAGTDLETLLGEPDSVAGVLLLAETDPSADPGALLAGTARVVAAVSAALPDARLWVATRDAVRVGDTEAIDPLAAALWGLGRVAALEAPGTWGGLLDLPGEIDERTADRIVAVLDGRVGDEDAAEDQVAVRASGVYVRRL
BGC0001381.1	nbrG	M11	AKR	M	Nocardia terpenica	Actinomycetes	WIALTRTEIPSDAAAVIAALTEAGVEVTTVAVDETASDPTELTRRLAAAQTADGIVSLLALDHRAADDDHSLVLDTLEIVRALDGDAPLWCVTADAVGASASDGAPAAVPAALWGLGRVAALEYPRRWGGLIDLPAAPDAASLAGLLTVLAGDTGEDQVAIRKGDILVRRL
BGC0001381.1	nbrG	M13	B2KR	MM	Nocardia terpenica	Actinomycetes	WLLATTAGESDTVVDEVRAAVTNAGAAVVDLAVATDSGTRAALAETLTALAADHEIAGVIALTGLAAGTPAALDAARPTTPRGLTATLHLVQALGDAGIPAPLWTLTRGAVSVGRSDALAAAEPALIWGFGRIAALEHTDRWGGLLDLPPDTGLDERAARRLVAVLAGAGDFGAEDQLALRGSGVLARRM
BGC0001381.1	nbrG	M14	ER	M	Nocardia terpenica	Actinomycetes	DARQVPPTLWVPAGAAVRVSTEILDKVRTWLDADAGDGPPLVVITRGATGSDPDTAVAAAAGLVRSAQVENPGRLALLDTDAAEVPDAILAGVAALAGTGAESWFAWTGGDLRVARL
BGC0001381.1	nbrH	M15	AKR	M	Nocardia terpenica	Actinomycetes	WIILGANDSDPALAALRATGLDLRVTADDDFATVLSTENAAGVVAVPPAGRDAAAQVAALTAWLRTLATHAEGRTATPRLWVLTRGAVSTSRRDPAPDPAGAAVWGAGRALALERSDLWGGLIDLPTDEVDDRTLGRLRGILAGATGEDQVALRAAGALARRV
BGC0001381.1	nbrH	M16	BKR	M	Nocardia terpenica	Actinomycetes	WLRATAAGAPGAVADEVTRVLRAAGATVVDLEVAADLGHRSVAASRLRALAAEHGEFAGVIGLTGLLTGVDDAFDALHPTTPRGLTATLHLVQALGDAGVTAPLWLVTRGGVSIGPSDRLSAAEPALIWGFGRVAATEHPDRVAGLIDLPASVHDGFDDRAARRFVGVLARAGALGAEDQLALRDSGILGRRF
BGC0001381.1	nbrH	M17	BKR	M	Nocardia terpenica	Actinomycetes	WLVACAPDTVPHNDFQQTLIDALDRAGADIVRLTAEDRGDARTAWSEALRPVLGEPIAGVVSLLAAADPEPEQPVPAGYSATIALVQALTDARVTAPVWAVTVDAGAAPDQAMAASFLRVAGLEHPELRGGIVDLPDRAPNRQLTQLFAAAVAGRTGEDEIRLRDGAAFGRRL
BGC0001381.1	nbrH	M18	EDH	M	Nocardia terpenica	Actinomycetes	WAVVGDDPFDVAATLDAVNVHLEVYSDPHVLAQACEFGAVAPPVLFTGIAGTDPESGSAPAELAPRRCAEILDLVRALVAEPALADSRLAVLLCGARPDGELADPVSAAVAGFVRTLAAEHPGRLVLVHVDSDVPQADSLATAVTSGHGEVVLRDGATHLPAW
BGC0001381.1	nbrK	M2	A1KR	MM	Nocardia terpenica	Actinomycetes	WLILAPGDEPVRELRNALVAAGFAEPDIVTVEPGTDRAALADRLRAAARTPHSAVVSALGLRPGETADGVAAGTATAVTVVQALGDAGVDGPWWWLTRRAVSTAPSETPDAALAQLWGLGLVAGLDDPGHWGGLVDLGDLGSDLATAVAVIGTGTDEDQLAVREGRVLARRM
BGC0001381.1	nbrL	M3	A2KR	MM	Nocardia terpenica	Actinomycetes	WMLVRPTTFAAGDAVVTRVRDALAAAGIEVVDVAVEPTADRADIAALLGEFAAEPDGVVSLLAAAESDHPEYRGLPVGVVTTLGLLQGLGDKGIAAPLWAVTVGAETTAADDHLTRPLQAAVWGLGRVAALEHPDRWGGLVDLPEADPASDDPVRLLPAVLAHPVEDQVALRAAGALVRRL
BGC0001381.1	nbrL	M4	B1KR	MM	Nocardia terpenica	Actinomycetes	WLVLTGTATDVRAAGTATDVRAAGTATDVRAAGTATDARAAGTATDARAAGTATDARAAGTATDARADETATDARADEVVAALTAAGAEVTLRRFDPAAAEVRLEDGTDPAGILLLPDTEPVGAVPGGVLTLAALLRATVGSTAAVWCATRAAIPATDADPVDERAAGVWGLGRIAAQEYPDRWGGLVDLPARLDDRTGGLLAAVLAGAGALAGEDQVAVRPAGLFVRRL
BGC0001381.1	nbrL	M5	EDH	MM	Nocardia terpenica	Actinomycetes	FHTDLMGVGGEIGGTVVVPAPIPADGTLPERTAAATRAALLLVQRWLTLPQRADARLVVLTTAACAAGDHAPDPAAAAVLGLVRAAQAEHPDRFVVLDHAPASVPGHEVTEAAVGAAVASGEPVLAWRDGQLRVPRL
BGC0001381.1	nbrI	M6	BKR	M	Nocardia terpenica	Actinomycetes	IRILDLAETPSAADDYQRILDRSTDVLVELQGQQDDSGMLAVVTRGGVDIGGEAAPEPWAAAVTGLVRAVQSESPGGILLVDAAPEIDARAAVATALATGHAQVAVRGSGAFAPRL
BGC0001381.1	nbrI	M7	ER	M	Nocardia terpenica	Actinomycetes	SIGTDVSGCARVESVEAVPAGDALAVLEPGLAPAVAARRTLDLIRPWLDRPAGRLTVITCGAAGPERSLPVDLGGAAAWGLVRSAASEHSGRFALLDADTLDGVAAAARGGLPEAALRAGALSVPRA
BGC0001381.1	nbrJ	M8	BKR	M	Nocardia terpenica	Actinomycetes	DDTDDAALYAVEWREIADAVAAAEPEPVHWISVEPGIPVAETATRALAALQDALTEDDTTLRVVVTHGAVAAAPGDRPDPAQAAVRGLALAALAETPDRFRLLDLPVGSTPEDAAPHHRPTSDEPDVAVRDDQRRGPRW
BGC0001381.1	nbrJ	M9	AKR	M	Nocardia terpenica	Actinomycetes	WLLHTDGTIDAALAALRDALAADVTATDEDLRAALTDDIPPAGVLAVVDTVNAVPDLVRVLAAAQQTGAETRLWCLTRGAVEPGAAQPDSATPEAAAVWGLGRSAALEHPGLWGGLLDLPPNTDDAQRDARAVAAALAAGGEDQIAVRDGQAHARRL
BGC0001394.1	phenalamide A2	M1	ER	MM	Myxococcus stipitatus DSM 14675	Myxococcota	WLVFSDRGGFGEELQSLLRTRGGACVGVVAGSAYERVSADLYRINPASPEDYRRLLRESFGEDGRCQGVVHLLGLDAAAFSSTTSATLASDLSHGAVSATYLAQALVRQGWRDVPRLVLVTRGARSVVEGDAVAPAQASLWGLGQTLATEHPELECTRIDLAPVPDARDASLLLSELVAKGHEDQVALREGRHVARF
BGC0001394.1	phenalamide A2	M2	EDH	MM	Myxococcus stipitatus DSM 14675	Myxococcota	WWVFVDGRGVGASLATALAERSQGCVIVEAGTAYERLGAEHFRIRPGSGEDLQALLREAFTEQLPCKGLVHLFSLDTPDAREPGALESAQTLGSVSVVHLLQAWAQRGWRDAPRLWLVTSGVRTVAAGDASGALAAASLVGLAAVVGHEHPELRCVHVDLSAKPASEEVAALAEELLADGPEERLVLRGSVRQVARL
BGC0001394.1	phenalamide A2	M3	A2KR	MM	Myxococcus stipitatus DSM 14675	Myxococcota	WVILGHREGLGGALKALLNARGEPCWLVVPGTDTSPSDDVHALDPRSPEHYEKLLREVGELRGVIHLWGAAEPSSEEPSLTDLESAQQHGVHSAVHLAQTLLRIGTPGVRLWLGTRGSQAVAGAASRSPVHAPLWGLGRVLALEHPELWGGLVDLEPGAPSNEAEALWGELSSSDGEDQVAFRGGIRHVARL
BGC0001394.1	phenalamide A2	M4	EDH	MM	Myxococcus stipitatus DSM 14675	Myxococcota	WLLLTEGTGPAEALASKLRESGCRPIRVQPGASFLRHGEDHFTIDPRRAEDYLRLLAEAALPGEPLAGVVHLWALQEGAPQRMDAAHALSCGSVLHLVQALASGGPSSARVWLVTRGARAVGSGPRPLALEQTPLLGLGVVFSQEHPELCGALVDLDPVTSEGDVLALWRELSATDGERQVAIRDGQRHVARV
BGC0001394.1	phenalamide A2	M5	EDH	M	Myxococcus stipitatus DSM 14675	Myxococcota	WVLFADSRGVARELRGLLAARGESCVWVTPGASYRSVGEGAYEVDPRDAEHVRRLLSDALPSGAPVCRGVVHLWSLDSAPNDALNPQTLERARHQGTTAMLHLVQALARAGWRDAPRLWLVTQGARSVGPSRERVSVAQAPLWGLGQVIAMEHPELRCTRVDLSTDAAGASDALFRELSSASPEDQVALRDGARHVARF
BGC0001394.1	phenalamide A2	M6	EDH	M	Myxococcus stipitatus DSM 14675	Myxococcota	WLVFVDPRGCGSALVEEIARHGEACVTVTAGRAYQRLDERRFVVDPEQPEDFARLLREAPASATRSLRVLYLWGLQAVGDAVVSPWTSTGALHLIQGVLRERKKARVWLVTRGAQVTGAAGEDVVLAQSPLWGFGRVVSLEQPDLWGGLIDLDPNDTSGEAAALLREVAASEADGEDQLALRKDRRLVPRL
BGC0001394.1	phenalamide A2	M7	EDH	M	Myxococcus stipitatus DSM 14675	Myxococcota	WLLFGDPQGFGCKVRTLLEARGESCVLVAAGDAYRRVEAGRYEVDLSRPDGFTQLLESEFGPGKPTCRGVVHLFSLDAHPEALEEAQRLGVKSALHLVQALVEASFRDVPRLWLVSGGIHAVNAGDAVSRVEHAPLWGLGRVLSVEHSELSCTNVDLQALDDAEAASFVEELLTPSPEDQLALRGGARFVARL
BGC0001394.1	phenalamide A2	M8	0ER-EDH	MM	Myxococcus stipitatus DSM 14675	Myxococcota	WLLLGEGGELGAAVESLLRARQDEVLRVDAARELEPVLVEAGAGLRGVIHFASSGAERGEDFTPATLEESRALGCGPVLDVLHVLTRARLRQSPRLWLVTRGVHDDVAGNLAASVGQAPLWGLGRTLAQEHPEFRCKRVDVSARLGPGDAAEAFVRELVGSDAEEEVSLRGDGRYVARI
BGC0001396.1	almHI	M1	CKR-0AT-0KS		Streptomyces sp. A1(2016)	Actinomycetes	WLLVVPEHLDADGTRVAHDVEQALTTHGATVHTLALDPATADFDGRFSRMFEEATDVTGILSLLGLAVGPHPEHGEVPLGVATSLTLTLTLTRQALRAGFGVPVWAVTRGAVSVVPGEVPETAGAQLWALGRVAALELPDRWGGLIDLPADTDARSVGLAVRALAAGIAAGEDQLAVRPSGAYGRRL
BGC0001396.1	almHI	M2	B1KR	MM	Streptomyces sp. A1(2016)	Actinomycetes	WLLVVPEHLDADGTRVAHDIQHALTTHGATVSHLTVDVKATDRTDLSARLTTTAAEEQEPLGGILSLLGWAEGAQVDRPTVPIAIATSLALVQAVGDAGFGVPVWAVTRGAVSVVPGEVPETAGAQLWALGRVAALELPDRWGGLIDLPADADARTAGLAVRALAAGIAAGEDQLAVRPSGAYGRRV
BGC0001396.1	almHI	M3	EDH	M	Streptomyces sp. A1(2016)	Actinomycetes	WAVVGQGGAAARYATADPGTGCVGVFPDLDALRTALDSGAERPDIVLADFGARPGTAAPHGTALADGVRDTARRGLALVQGWLSDERFAAARLAVLTEHAVATEADERQVDLAGSALWGLMRSAQTEHPDRFVLVEHDGQDASYQALPAALDSGIPQLALRSGKVRTPGL
BGC0001396.1	almHII	M4	EDH	M	Streptomyces sp. A1(2016)	Actinomycetes	WGVLGDAGQALLEGVRDGAQAPVRTYDDLAALAASDTPLPDHVLVELGHDGDDLAAGAHDLAERALAVVQGWLAHARFTDARLVVLTHGAVAAGTSAVRPAAAVAWGLLRSAQSEHPGRFVLVDADPSDPAASYRSLSRAVTSGASQLALRGDEILVPRL
BGC0001396.1	almHIII	M5	C2KR	MM	Streptomyces sp. A1(2016)	Actinomycetes	WLLVVPEHLDADGTRVAHDVEQALTTHGATVHTLALDPATADFDGRFSRMFEEATDVTGILSLLGLAVGPHPEHGEVPLGVATSLTLTLTLTRQALRAGFGVPVWAVTRGAVSVVPGEVPETAGAQLWALGRVAALELPDRWGGLIDLPADTDARSVGLAVRALAAGIAAGEDQLAVRPSGAYGRRL
BGC0001396.1	almHIII	M6	ER	MM	Streptomyces sp. A1(2016)	Actinomycetes	WIVVGDEDDGLGLAEVLSGAGTGIERHRNLADALTALRPPADTAGSPAATDTTPLIAVPVSPSPTMDAVAVRHAVHQALESVQGWLSADEAAGEGGSGAAGADGRLVLITSGAVSTGDADPLRDPVASAVWGLVRSAQSEQPDRFVLVDLDEGAVDGAALSAAIASGEPQLALREGKVHVPRL
BGC0001396.1	almHIV	M7	A1KR	MM	Streptomyces sp. A1(2016)	Actinomycetes	WLLVVPEDLDADGTRVAHDVEHALTTHGATVSRLTVDVTATDRADLAARLTTTAAEEQEPLVGILSLLGTDERQHPDHPGVDRATAATMLLAQACADLDADVARGVEPKLWVVTRGAVAVSPAERPSSAGAQVWGLGRCAALELPTRWGGMVDLPRAARDTGRQGRQLVRVLSETSAEDQVALRASGAYGRRL
BGC0001433.1	arpPI	M1	EDH	M	Streptomyces argillaceus	Actinomycetes	WSEAVASDDSLDSAEPADVVVLRVPAVPDGADDPRPTTGRVLRLVQRWLADERFAGSRLALVTRRAVAARPGDDVDLAGAPVWGLIRSAQSEHPDRIVLIDLDDDPAADSLLPAALAAEEPQLAVRDGRLHAPRL
BGC0001433.1	arpPI	M2	EDH	M	Streptomyces argillaceus	Actinomycetes	PDGAEVREVVSGGRSAPEVLHDTLHGIQEFLTDDSKADHTLIVVTRGAVALEGEEIADLAAAGVTGLVRVAQTEHPGRIVLADLEPDTDLDASLILATGEPQLAVRDGVTYVPRL
BGC0001433.1	arpPII	M3	EDH	M	Streptomyces argillaceus	Actinomycetes	PDGAEVVEVVSGGRSAPEVLHDTLHGIQEFLTDDSKADHTLVVVTRGAVALEGEEIADLAAAGVTGLVRVAQTEHPGRIVLADLEPDTDLDASLILATGEPQLAVRDGVTYVPRL
BGC0001433.1	arpPII	M4	0DH-CKR	M	Streptomyces argillaceus	Actinomycetes	WADLGPDGGDGTGTAYSTLSEAAEAIAAGAPVDALRVWAHDESGTDVVDALHRRTRDALALVQEYLADERLGDVPLAVVTRGAVAVGAEEVADLAGAGVRGLLRSAQAEAPGRIFLLDLERSAGGEGEPLAPDALLSAVVAADEPEAAVRDAGIRVPRL
BGC0001452.1	sipP1	M1	EDH	MM	Streptomyces sp.	Actinomycetes	CAVTGTDHFGLAAALGTYASAEAGSETGPETGAPAAVFLSVATGPGQPVADGAHSAVQEVLHQVQHWLADEPYADARLVVVTRGAVTTRGEDVTGLATAGVWGLVRAAQCEEPGRFVLLDIDDQPLPVEDVLAAIEAGEEQLAVREGRVHTPGV
BGC0001452.1	sipP5	M10	EDH	MA6,9	Streptomyces sp.	Actinomycetes	LAVLGSDPGGLVAALGAAGFAATAHTGPQTLSAGTVPPVVVLDRSPSPTAQGPEAVHAGVRDTLDLLTAWLETEALAGTTAVFLTRGAVALPGEDVTDLVGAAVWGLLRSAQAENPGRFVLVDTDGSAASHEALHALLASGEPQAVVRDGTVHGGRL
BGC0001452.1	sipP1	M2	EDH	M	Streptomyces sp.	Actinomycetes	YEALAALLASTGPMPDAVLHVPQVPAGEPPAAVRKTVADTLTLLNDWLAAERCAAARLVVATTGFGPVDGAVAGLVRAAQAENPDRITLVHLGPDGIRADLLTEGLRSGEPEFAIHDGEVRVARL
BGC0001452.1	sipP2	M3	EDH	MM	Streptomyces sp.	Actinomycetes	WAVLSADGGASETRTPMLPAAVTATSLDDIAEADVVVLASGTGSDPEAVRRATGHTLHTLQAWLAADRFADATLVVLTHGATDGADDGATDGAGLAAAAVRGLVRTAQLENPGSFLLVDLDGHEDSARLLPYVTTLGHPEVALRSGTVQVPRL
BGC0001452.1	sipP2	M4	EDH	M	Streptomyces sp.	Actinomycetes	YAGTSVVVDDLADLEAADVPDVVVLRVGGAGTGNAGSDDGTTAADSARTTTAKVLGALTAWLADERFTTSRLALLTRHAAPATSDPDLAQAPVWGLVRAAQAEHPGRFLLLDVQDTREIRDADEAHVPSGPREAGHAVPDTALIAALGTGEPEIVIRDGALFVLRW
BGC0001452.1	sipP2	M5	ZDH	M	Streptomyces sp.	Actinomycetes	WAVLGADVHDLGHRVYAEPGVVPDPVPRFVTYDCPAIDGTVPEAVRTATCDLLALLAGWLEEPRFAEAHLVLTVGEHLTQAPLAGLVRAAQAEHPGRITLVRTTGGPVNAGLLADAVASGEPELTIVDGEIRAPRL
BGC0001452.1	sipP4	M6	A1KR	MM	Streptomyces sp.	Actinomycetes	WLLVTPPDAPRAKAVAEALTVHGAAVVTVETDGADRAELADRLRAPECRDAAGVLSLLADGTPGHADGPALPDAGPTLVLFQALQDIGATAPLWCVTSDAVAVHGTEDVDPGAAALWGLGTVLALDHPEAWGGMIDLADADDDAVRERLCRVLSGAPGEDQVAVRRTGAFAKRL
BGC0001452.1	sipP3	M7	EDH	M	Streptomyces sp.	Actinomycetes	VTTGAFDAVDLAGPDIPGLVVLRCEPGTGADAVRNAVHRALEALRAWLAADSTAGSTLAVVTRGAVAVGDEPVADPAGAAVWGLVRSAQAEHPGRFVLLDEEAVRDAGREAATEAVRDAGREAATEAVRDAGREAGRETAGESARDAGGATPAGANAGHGPAPLTPTALAALSHAEPQLVLRDGVPHACRL
BGC0001452.1	sipP3	M8	EDH	M	Streptomyces sp.	Actinomycetes	WRVLGDGHPELARALGAVPADGLAGVADAAVVLVPSGGADATPGATHREVHRVLGVLQTWLADERFAKGRLVVVTRGAVSCGSGEEPCDLAGAAVSGLVRSAQAEHPDRIVLVDLPADDGDPAALPAAVASGEPQVALRRGSVLAPRM
BGC0001452.1	sipP5	M9	EDH	MM	Streptomyces sp.	Actinomycetes	PAEGLNIVDFASLAGADASAPAPDVVVLRVTGGTGADAARDATHRVLADVQTWLRDERCRTSRLVVLTSGAVALPGEDASDLGAAAVHGLIRSAQSEEPGRLLLVDGDAEPDALDLLPRIVGLNESSVAVRGGTALLPRL
BGC0001457.1	JomP2	M2	EDH	M	Streptomyces caniferus	Actinomycetes	WLVLADRRGVGSALAAQLRTSGHEATVVEADAHDDTHLRTLVRERTADGSPLNVAFLPGLDEPDDEPTAESLEQAQGTASAALLAVLQELSGAGRAARVLVVTRGTQSLSAHPVRVVHAPLWGLAAIAGAENPDVRCVLVDLDPDGPAVRNEAEALCAEALAADGDDRIAFRGGRRHIAGT
BGC0001467.1	hapB	M1	CMT-B2KR	M	Fischerella sp. PCC 9431	Cyanobacteriota	WLIFADNQGIGQELSGLLRSQQQACILVYPGTEYKQIAEQEFSINPALPKDFQQLLLEQVACDKTSWRGVVYLWSIDTVSADALTVADLEVVSQTGCGGVLSLFQSLISKEFSPPPTLWLVTKGAQRVSIESTLVGVAQSPVWGLGKVIKDEHPEFNCTLVDLDPQGNNNAQSLFAEICSPKPTSGDHIAFRNGQRYVNRL
BGC0001467.1	hapE	M4	AKR	M	Fischerella sp. PCC 9431	Cyanobacteriota	WLVFIDACGLGSQLVKQLEQNSQDVTTVMLGEQFTRHGESVYTINPRKRDDYEALLKELHSLNKAPKTIVHLWSITPNADTSLEIEFFEKSQYLGFYSLLFLAQALGEQNLTDPLQIVVVSNNMQEVTGVEALCPEKATVLGPCRVIPQEYPHITCKNIDIVISESETWDEGGLLGCILSELAAPPSNLVVAYRETHRWVQTF
BGC0001495.1	aalA1	M1	C1KR	MM	Actinoallomurus fulvus	Actinomycetes	WLVVSRPGHHAAVTAVAAGLARHGADVRTVGWGAERPAIDGPVHVLALLDLDAAVELVQALDGTGASVWFATTGAVSVAPHDPLTRPEGALVWGFGRAYALERPRSFAGLIDLPGRLDDAAIDRLCAVLSDATEDQVAVRPTGTYARRL
BGC0001495.1	aalA1	M2	A1KR	MM	Actinoallomurus fulvus	Actinomycetes	WLVVHTDEERAGPVAAALSEHGAEPVAHAWHGETPDLTPYAGVVSLLGFEDTVALVRGAGEGDLWLVTTNAETDPRAAMVWGLGITLSLEQPELLRGIVDLPPDPDGPTRTRLAAALSGTTGEDQLSVRPSGTFARRL
BGC0001495.1	aalA1	M3	EDH	MM	Actinoallomurus fulvus	Actinomycetes	HRVEAAGGVRAALADALAAVRARLEDPGGEPLVIVTTGAVAVRPGERAGDPAAAAVWGLVRSAQSEHPGRFVLLDTDDPAEAVLVADEPEIAVRGGRAYTPRL
BGC0001495.1	aalA2	M4	ER	MM	Actinoallomurus fulvus	Actinomycetes	WVTLGEHPELTAPSYPDLEAVRAAGGVPGYVVLPCPEPPGGPAEAAATAVHEMLAVLRAWLAEEAFAASRLVVLTRNAVAARPDEDVTALAAAPLWGLVRSAQTENPGRFVLLDADDDLRPLPAALATGEPQLALRGGEILAPRL
BGC0001495.1	aalA2	M5	B1KR	MM	Actinoallomurus fulvus	Actinomycetes	GALPPDGTVLEHFAATDEPSAEAARAATGRALDLLTADRGGARLVFVTRGAVATDDRDGVPDPALAAVWGLVRSAQLENPGAFVLADVDGTDASRDALAAALATGEPQLALRRGSASVPRL
BGC0001495.1	aalA2	M6	AKR	M	Actinoallomurus fulvus	Actinomycetes	WLVAGAEDDPVARLLAERGARIVSRTGPLDPAAAGIVCLTGSADEALELIHTVGDREVPVWFVTRRAVAARPSDAPVDPDAAMVWGLARVFGLEHPRAWGGLADLPAAVDAGTAGRLAAVLTGAGGEDQLALRSTGVLARRL
BGC0001495.1	aalA2	M7	EDH	MM	Actinoallomurus fulvus	Actinomycetes	CRVPSGDDPVRTAHEAVRAVAETLRHRIEADEPARLVVLTRGATGTGATDLAGAAVWGLVRSAQAEHPGRLVLVDADEEVPDASLRAILASGEPQAAVRAGTAHVPRL
BGC0001495.1	aalA3	M8	ER	MM	Actinoallomurus fulvus	Actinomycetes	GEPEDTVPYAEALSAAAPPALAILEPEPAEDPRQATRRTLDALRAWLAAEHLAGSTLAVLTRGAIGVLPGEDVADLTAAPVWGLLRSAQTENPGRFVLVDTDEASRDRVAAALATGEEQIALRGGTAYVPRL
BGC0001519.1	artP	M1	0DH-A2KR	MA6	Streptomyces aurantiacus JA 4570	Actinomycetes	YAVLAASDAGLAGSLGQGGALFTGLDELAASSQAIPPLVFAVTDTTGGSDGTGGSDGTGGSDDAPAAVERTLHQVLGWTQRWLSEDRFAHSRLVIVTRAATGDGQAPRTDPAAAAVWGFVRTAQTENPGRFTLVDSDDQPASWAGLAAAAATAQDQLRIRAGLVSTPQL
BGC0001519.1	artQ	M2	ER	M	Streptomyces aurantiacus JA 4570	Actinomycetes	WGVLGAKDGLAGRLCEPADSSAVFHASLDDVLAGEAPRHLLLCLDDITAGNDGDPLAALAGTHTRVLGLIQRFLAEEALAGSTLAVLTRRAFDTSGAESVESPAGASVWSLIRSAQTEHPGRFRLLDTDDADTSLARLPDALALGEDQLALREGTFLAPRM
BGC0001522.1	AurP5	M1	EDH	MM	Streptomyces filamentosus	Actinomycetes	CAVTGTDPFGLAAALGTYESAETGSEAGSEAGTPVTVFLSVATDAGQPVADSAHSAVQEVLRQVQHWLADEPYADARLVVVTRGAVTTRGEDVTGLAAAGVWGLVRAAQCEEPGRFVLLDIDDQPLPVEDVLAAIEAGEEQLAVRAGRVYTPGV
BGC0001522.1	AurP1	M10	EDH	MA6	Streptomyces filamentosus	Actinomycetes	LAVLGSDPGGLAAALGAAGFAATAHTGPGTLSAGPVPPVVVLDRSPSPTAQGPDAVHAGVRDTLELLTALLDAEALAGTTAVLLTRGAVALPGEDVTDLVGAAVWGLLRSAQAENPGRFVLVDTDGSAASHEALHALLASGEPQAVVRAGTVHGGRL
BGC0001522.1	AurP5	M2	EDH	M	Streptomyces filamentosus	Actinomycetes	YEVLAALLASTGPMPDAVLHVPQVPAGDPPAAVRKTVADTLALLNDWLSAERCAAARLVVATTGSGPVDGAVAGLVRAAQAENPDRITLVHLGPDEIRADLLTQGLRSGEPEFAIHDGEVRVARL
BGC0001522.1	AurP4	M3	EDH	MM	Streptomyces filamentosus	Actinomycetes	WAVLSPDGDAPAPRTPMLPAAVTATSLDDIAEADVVVLLSGTGSDPEAVRRATGHTLHTLQAWLAADRFADATLVVLTHGATAGAADGATDGADLAAAAVRGLVRTAQLENPGSFLLVDLDGHEDSARLLPYVTTLGHPEVALRAGTVQVPRL
BGC0001522.1	AurP4	M4	EDH	M	Streptomyces filamentosus	Actinomycetes	YAGTSAVVDDLADLGADVPDVVVLRVGGAGTGNADSDDGRTAADRARTTSAKVLGALTSWLADERFTTSRLALLTRHAAPATDDPDLAQAPVWGLVRAAQAEHPGRFLLVDVQETRENPDADAAPVPSGTREAGDAVPDTALSTALGAGEPEIMIRDGALFVPRW
BGC0001522.1	AurP4	M5	ZDH	M	Streptomyces filamentosus	Actinomycetes	WAVLGADVHDLGHRVYAEPGVVPDPVPRFVTYDCPAIDGTVPEAVRTATCDLLVLLAGWLEEPRFAEAHLVLTVGEHLTQAPLAGLVRAAQAEHPGRITLVRTTGSPVNAGLLADAAATGEPELAIADGEIHAPRL
BGC0001522.1	AurP2	M6	A1KR	MM	Streptomyces filamentosus	Actinomycetes	WLLVTPPDAPRAKAAAEALTVHGATVVTVETDRADRAELADRLRAPECRDAAGVLSLLADGTPGHADGPALPDAGPTLVLFQALQDIGATAPLWCVTSDAVAVHGTEDVDPGAAALWGLGTVLALDHPEAWGGMIDLADADDDAVRERLCRALSGAPGEDQVAVRRTGAFAKRL
BGC0001522.1	AurP2	M7	EDH	M	Streptomyces filamentosus	Actinomycetes	VTTGAFDAVDLAGPDVPGLVVLRCEPGTGADAVRNAVHRALEALQAWLASEATAGSTLAVVTRGAVAVGDEPVADPAGAAVWGLVRSAQAEHPGRFVLLDEEAVREAAREAATEAVREAGRETVRETAGESAREAGAATTEGANAGHGPAPLTPAALAALSRAEPQIVLRDGVPHACRL
BGC0001522.1	AurP2	M8	EDH	M	Streptomyces filamentosus	Actinomycetes	WSVLGDGHPELARALGAVPADGLAGVADAAVVLVPSGGEDATPGATHREVHRVLGVLQTWLADERFAKGRLVVVTRGAVSCGSGEEPRDLAGAAVSGLVRSAQAEHPDRIVLVDLPADDGDRASLAALPAAVASGEPQVALRRGSVLAPRM
BGC0001522.1	AurP1	M9	EDH	MM	Streptomyces filamentosus	Actinomycetes	PAEGLSIVDFASLAGADASAPAPDVVVLRVTGGSGADAARVATHRVLADVQTWLRDERCRASRLVVLTGGAVALPGEDVSDLGAAAVHGLIRSAQSEEPGRLLLVDGDAEPDALDLLPRIVGLNESSVAVRGGTALLPRL
BGC0001523.1	azlE	M10	BKR	M	Streptomyces sp. 211726	Actinomycetes	WLLVVPASGDDDAFVESASAALRRHGAEVVRVVADEADLAPGVLADRLREIATDPSGIGGVLSLVGVDERPCTEHPAVSRGLALTLTLVRALTEADLRTRLWCATRGAVSVGRSDRLTSAVQAEIWGLGRAAALEHPRSWGGLVDLPETLDERAAARLAWALSAEDGEDQVAVRGSGAYARRL
BGC0001523.1	azlE	M11	AKR	MA22	Streptomyces sp. 211726	Actinomycetes	WLVVVPASRAEDELVAEVVSGLGRHGADVVSLVADERDLDAGALGERLRGAIADTPALGGVLSLLALDEEPCAEHPALSSGLALTLTLVRAMADTGIEASLWCGTRGAVSVGRSERLSHPTQAMVWALGRVAALELPRLWGGLVDLPESLDERAVARLAGVLSADATEGAEDQVAVRGSGVFARRL
BGC0001523.1	azlE	M13	B1KR	MM	Streptomyces sp. 211726	Actinomycetes	WMVVVPPVDAARALAERIARDVERHGARMVRVDLDETEPERSSLAGLLRAAAPGTPSADGAEQEGTLAIDGVLSLLALDEEALAEHPGIPRGFAGTVALVQALSDIDIEVPLWLATTGAVSVGRSDRVGSVKQSLVWGLGRVVGLEYAQRWGGLVDLPESPDALDERGLNRLVGLIGRSGDEDQVAVRASGVFARRL
BGC0001523.1	azlE	M14	ER	M	Streptomyces sp. 211726	Actinomycetes	WAVVGTDHYGLAAGAIAGAEVTAYADLDALGAAIDGGAAAPEAVLVSYAPGLDDEAAQGRPKSKAKSKAKGKAKRGLEPAGAIHAVTHHTLGMIQGWLGDRRFASSRLVFVTSGAMAPEERDETPDLIHAPLWGMVRSAQSENPNCFVLVDLDEDEASKAMLPSVLATDEPQAVVREGTVLGQRM
BGC0001523.1	azlF	M15	A1KR	MM	Streptomyces sp. 211726	Actinomycetes	WLVVVPASRAGDELVSEVVTGLERHGAGVVPVAVDEPDLDADVLAERLRELADGTPELGGVLSLLALDEEPCPGHPALAGGYALTLMLVRAMVRADIPARLWCGTRGAVSVGRSDRLTSPTQAMVWALGRVAGLELPPLWGGLVDLPESLDERGAARLAGVLSVEGGEDQVAVRGSGVFVRRL
BGC0001523.1	azlF	M16	BKR	M	Streptomyces sp. 211726	Actinomycetes	WMVMVPRSYADDELVTSAVAMLERQGADVARIELDGAADIDREAVAERLRTAAGDAPDGPVGGVLSLLALDEDPCAGHTVVPRGLALNLVALQALVDAGVEAPLWVATRGAVSVTGSDTLRSAAQAQMWGLGRVAGLEHPRLWGGLVDLPETFDERAAARLSGVLGGGAGEFEDQVAVRTSGVFTRRL
BGC0001523.1	azlG	M17	B1KR	MM	Streptomyces sp. 211726	Actinomycetes	WLVVLPASHADDALVSATMNGLETSGADIVRVVLDESGNDRWTVAERLRAALDEAGVEPSGLAGVFSLLGLDESGHPTFEVVPAGLAAMVALVQGLGDAGVVAPLWCGTRGAVSVGRSDRLVSPVQAMVWGLGRIVGVEYPQRWGGAVDLPETMDGRAVARLIGVLAGTEGEDQVAVRGSGVFAKRM
BGC0001523.1	azlG	M18	EDH	M	Streptomyces sp. 211726	Actinomycetes	WAVLGTDDLGVRSGFEAAGADVVAYADLAALRDAIDAGATAPDVVMVAGAAAAAGIDDGADLAGRVRDTTYRALELVRTWVTDERFDDSYLVFVTRGAMGARSSAEVRTPAEAAVWGLLRSAQTEHPGKFLLVDLDPEEQGEVSSLLRTALTAEEPQVAVRDGRVLAARL
BGC0001523.1	azlH	M19	EDH	MM	Streptomyces sp. 211726	Actinomycetes	SAVLGDDLLGMGAALELSGVTVDVYTDPVALGDAVSSGTLMPGMVVLPVVPGGSAVVDEVHARVAEVLETVQSWLADERFAGTRLVLVTRGAVDTGDGVTDLAGAAVWGLVRSAQSENPGRVVLADIDDVERSAALLAEVVASGEEQVVVRSGEVRVPRL
BGC0001523.1	azlB	M3	B1KR	MM	Streptomyces sp. 211726	Actinomycetes	WLVAVPEACDGDVLVAAVLDGLAGRGARLVRVVVGAADGREAITERLRVALDEAGVEPSGVAGVFSLLGLDESAHESFAIVPAGLAATVALVQGLGDGGVVAPLWCGTRGAVSVGRSDRLVSPVQAMVWGLGRIVGAEYPQRWGGVVDLPETLDSRAVARLAGVLSAESGEDQVAVRGSGVFAKRL
BGC0001523.1	azlB	M4	EDH	M	Streptomyces sp. 211726	Actinomycetes	WALVGPDQVEVAGVLGTAGVTVDTYPDLAALAGAIDAGATAPEVVLAAHVSPTRRTRELAEAVREAGHRALGLLKGWLADERFGASRLVFLTQGAIAAGADTDVADPAAAAVWGLVRSAQSENPGRFVLADLDDQDGSRRILPVALTADEPQIVVRDGEDLAGRL
BGC0001523.1	azlC	M5	EDH	MM	Streptomyces sp. 211726	Actinomycetes	AVAGGEIAPGTEVVRVVSGGVDVVGDVYGRVLEVLERVQGWLADEERAGERLVVVTCGAVDAGEGVSDLAGSAVWGLVRSAQAENPGRLVLVDTDDVDGVGGVLPGVLALGEEQVVVRSGAVRIPRL
BGC0001523.1	azlC	M6	BKR	M	Streptomyces sp. 211726	Actinomycetes	WLLAVPASLADSEFTQTISQGLEKSGARVVPVAVDTDTDRDGLARTLLAAVDGESDVRVLSLLALDEEPSAGEPVVTSGLALTLWLVQAVAGLGVRVRLWCASRGAVSVGRSDRLASAAQAQVWGLGGVAALEHPQIWGGLVDLPETLDERAVARLAGVLSAESGEDQVAVRGSGVFAKRL
BGC0001523.1	azlD	M7	AKR	M	Streptomyces sp. 211726	Actinomycetes	WLVVVPASRAGDELVEGVVSGLERHGAGVVSLTVDEGDLDAGALGERLRGVVADVSELGGVLSLLALDEEPCPGHPALSNGFASTLMLVRALVEADVEALLWCASRGAVSVGRSDRLAGVVQSQVWGLGRVVGLEHSAVWGGLVDLPEVLDERAVGRLVGVLSGGGDGEDQVAVRGSGVFARRL
BGC0001523.1	azlD	M8	BKR	M	Streptomyces sp. 211726	Actinomycetes	WLLAVPASLADSELTVTITQGLEKSGARVVPVAVDADADRDGLAEALLGALGEESEARVLSLLALDEEPSAGEPAVAAGLALTLRLVQAAAGLDVDLRLWCASRGAVSVGRSDRLVSAAQAQVWGLGRVAALEHPQIWGGLVDLPETLDERAVARLAGVLSAGSGEDEAAVRGSGVFGRRL
BGC0001523.1	azlD	M9	AKR	M	Streptomyces sp. 211726	Actinomycetes	WLVVVPASRAGDELVEGVVSGLERHGAGVVSLTVDEGDLAAGALGERLRKAVADAPELGGVLSLLALDEGPCPGHPALSSGFASTLTLVRALVEADVEALLWCASRGAVSVGRSDRLAGVVQSQVWGLGRVVGLEHSAVWGGLVDLPEVLDERAVGRLVGVLSGGGDGEDQVAVRGSGVFVRRL
BGC0001537.1	APK71_RS29920	M1	ER	M	Streptomyces sp. NBRC 110030	Actinomycetes	ATVLAAPDTPVGVDPASAAHQVAEQVLHRAQELLDGAGPVVVTTRGAVAALPGEDADPAQAAVRGLLRGAQAEHPGRFTLVDTDGSLDPAAVPAGEPQVCVRDGAVLVPRL
BGC0001537.1	APK71_RS29935	M4	ER	M	Streptomyces sp. NBRC 110030	Actinomycetes	GADPRLVAEVLRMPALGDEPESVHRVCHALLAGLQHWLSAPDSGTSRLIVLGERAVSTHPGESIDPAMAAAWGLAASAQAEATGQITLVDLSPGTDADDGLLAALAATGEPQLAVRPTGVLAPRL
BGC0001537.1	APK71_RS29940	M5	EDH	M	Streptomyces sp. NBRC 110030	Actinomycetes	VTGDTTTSPTDSVHEAPPTSSPLEAACWALDLIRETEGSLVLVTRGAVATVPGEPAEPAMAAVWGLARSAQAEEPSRRITLVDLAPGTDLPPALPAGEPQLAVRDDVLAPRL
BGC0001537.1	APK71_RS29940	M6	EDH	M	Streptomyces sp. NBRC 110030	Actinomycetes	AQAETVSTAGTSVCQVPPSDSPLSAATWVLTRLRESTGPLIVVTTGGVAATARERPDPAMAAVWGLARSAQAESPDRIVLVDVEPGTPLPDGLLEELPGGEPQLAWRGGEFLAPRL
BGC0001597.1	flvP2	M3	ER	MA3	Actinomadura fulva subsp. indica	Actinomycetes	VAVVGESWPALVTAVQAAGGGITEYTDVAALADALASGQDAPGAVVMRLQSGDEQDPLEDLRSELDRVVAVLGGWLADERLAEMRLVLVTTGAVTVETDPDAGGLVGAAVSGLVRSAQAENPGRILLIDLDHTPESLTVLASLLGMEDEPQMAIRAGRVLVPRL
BGC0001597.1	flvP2	M4	ER	M	Actinomadura fulva subsp. indica	Actinomycetes	VAVVGERWPGLVAAVESAGAGIEEYADVAALDSALASGKNAPGAVVMRLVTSEAEHAPLENLRSELDRVVGVLADERLAEMRLVLVTTGAVTVEADADAGGLVGAAVSGLVRSAQAENPGRILLIDLDGAAESLTALASLLGMEDEPQVAVRAGRVLVPRL
BGC0001597.1	flvP3	M5	ER	MA3	Actinomadura fulva subsp. indica	Actinomycetes	IGTVGEDDALTEALHRNGLKVRSYADLQAASTDKDVTTLVIPCPTRQPDDQGPLEDLRSELDRVVAVLGGWLADERLAGTRLVLVTTGAVTVDTGTLDAGGLVGAAVSGLVRSAQAENPGRILLIDLDHTPESLTALATLLAVEDEPQIAIRSGRVLVPRL
BGC0001597.1	flvP1	M1	ER	MA3	Actinomadura fulva subsp. indica	Actinomycetes	VAVVGEQWPALVTAVQAAGGGITEYTDVAALADALASGQDAPGAVVMRLVTSEDEHALLEDLRSELDQVVAVLGGWLADERLAEMRLVLVTTGAVTVDTGTLDAGGLVGAAVSGLVRSAQAENPGRILLVDLDGAAESVTALASLLGVEDEPQVAVRAGRVLVPRL
BGC0001597.1	flvP1	M2	AKR	M	Actinomadura fulva subsp. indica	Actinomycetes	WLVPVPAAARDTQIVRDILDGLAAHGVRVHPLVVDDEDRAALTAALRSAIADAETAVPGVSGVSGVLCLLPLDDEPHKEHPTLSRGGAATVTLVQALADAEVSAPLWLATSGAVAVDEGAESVNPFQTSLWGLGAVLAVDHPDTWGGIVDLPLSPGAEDVALLHGVLEGTSGEDQVAIRSGGVRARRM
BGC0001598.1	foxBII	M2	EDH	MM	Streptomyces diastatochromogenes	Actinomycetes	WLILADETGTADELAERLGTSVPHVIARRGDTFRRQGPGRYVLDPADPGQLARLLDEAFADTPPERVVQLSALDAPPVTDAGTAEESARLCCLSTLHLVRTLTDRTRGPAPRLFVIARGSQAAGGSEQVTHPEQALAWGFGLAVAQEYPELSTTLVDLPSEGGTDALWTQLRHADDERLVALRESGRLVPRL
BGC0001619	ibomycin	M6	EDH	M		Actinomycetes	PPLEAVSSAAPLEIVDLPGGGPLPAAVDEAVRVALHRTLRVLQERLDTPGDDDTPVVLRTRGAVRLPGEDAATDPVAAAVQGLVRSAQSENPDRFLLVDTDTDTDTDTDTDTDTADTDAADAAAACDDGAAGWTALSAALLAYDERQLTLRNGRWYGPRL
BGC0001619	ibomycin	M7	BKR	M		Actinomycetes	WLLLHSEDGPHDPLGDEIVDALRAGGADIVRLALTEPSADAVAERIRAASPDTPLAGVLCLTGLDETPDPAHPVVTQGLGQWLTTLRALVALDADLPLWTVTTRAVGTGPTDPPAHPAQALLWGANAVLGLELPHCTGGLIDLPGRLDGEGAALLRTVLSGVTEEEHLAIRSTGLMARRL
BGC0001619.1	ibomycin	M16	AKR	M	Streptomyces sp. WAC2288	Actinomycetes	WLLVESEAVENPWSEALADELTARGAHVERLAVEAAEPDRDALAERLATFDECTRVVSFLGQDERTSAEAGPTFGLRATTVLVQALADSGLAARVWSVTSGAVSAGPGDELTHPLRAAVWGLGRVVALEEPDHWGGLIDVPDQPDERSVGRLADVLAGASGEDQVALRAGAALGRRV
BGC0001619.1	ibomycin	M17	AKR	M	Streptomyces sp. WAC2288	Actinomycetes	WLMVGFAGAEEAWAEALAGELVARGARVEWLRVGVAEVDRGVLAERLAGFGDCARVVSFLGQDERMDVDVSCGVPLGLLGTAVLVQALADCGVGARVWSVTSGAVSAGPGDVVSHPLRTAVWGLGRVVALEEPDRWGGLVDVPDQPDERSVGRLADVLVGASGEDQVAVRAGAVLGRRL
BGC0001619.1	ibomycin	M18	EDH	M	Streptomyces sp. WAC2288	Actinomycetes	AFVLLGTGRTSESAQGTFHRDLPQLREALDAGSPVPANVIALVNGVAHGTTGTAETLAASDDTGAADPAGATHRAVLRTLDLIQEWLSDERLEESRLTLVTTGALAVGPRDTVTDLAGAAVWGLVRSAQSEHPGRFQLVDVTDRAPVALSTADRTSTDHDPADRTSPDRESADRASAGRESAGRESAGRVSAGRDRAVSGLADDDAIGLQLVSRAIASDEPQLAERDGGLLAPRM
BGC0001619.1	ibomycin	M19	EDH	M	Streptomyces sp. WAC2288	Actinomycetes	LVLVGSDSLAIAEPLAVSGVPVESFADLPALAAAVATGMTLPETVLVTFDGTAALRTDALPHAVRTVTAAALETVRQWLTDERFADAQLVCVTRSAVARGDGSAEGPTDLACAPLWGLLRTAQSENPGRFVLADLDGSPESLLALPTALASGEPQLAFRDGLAHAARL
BGC0001619.1	ibomycin	M2	A1KR	MM	Streptomyces sp. WAC2288	Actinomycetes	WLVLTPAEDVRPDLVRAVLDGLADHGATVHAVPADTLATPGALAGGLTLSGVLSLAALDERPDPREPALTRGLAHTVAAVRALAGPAPDAPLWFATRSAVTTGPADPVHHPAQAQVWGVGTVLGLDEPERWSGQIDLPEELDGPAVARLAALLTGVSGENEVALRADGAHARRL
BGC0001619.1	ibomycin	M3	A2KR	MM	Streptomyces sp. WAC2288	Actinomycetes	WLLVSSEALHEDPALATLKDGLTASGAEVIDLVLAAGAERSDVAGLLAAQGELAGVVSTLAYDESPHPRHPALTTGLALNLLLTQVLTERDTPVPLWLCTRDAVSTGSGDSLTHPVQSGTWGLGLVFGLEHPDRWGGLVDLPETVTAADAERLAAVLAGGGAEDQFAVRAGRALLRRL
BGC0001619.1	ibomycin	M5	EDH	M	Streptomyces sp. WAC2288	Actinomycetes	WALIGPAARLAATLDGAAHLTTHPTVAELLAEVAAGAPVPDRVIVADPPVAGEPDRAAREATGRALDHLQTWLADERVARSTLVLLTEGALAVDADTELTDLPGAAVHGLVRAAASENPGRLLLIDTDPGPASAAALPWALTVEEPRAVVRDGVVRLARL
BGC0001619.1	ibomycin	M8	AKR	M	Streptomyces sp. WAC2288	Actinomycetes	WLVVAARADAEGATATAVTTALTGQGATVHTLVVGDTDGDREALAVRLRESAPEPAGVLSLLALDERPDPRHPALTRGLATTMALTQALGDARITAPLWIATQGAVSIGRSDPLRTRHQAMVWGFGRVVGLEHPDRWGGLLDLPATLVARDAERLAVTLADGAEDQVALRGSGTFVRRL
BGC0001619.1	ibomycin	M9	BKR	M	Streptomyces sp. WAC2288	Actinomycetes	WLVVSRSTGAETAESDPLAPMVADALRAAGAEPVTMVIGPDTDRATLAAALREHQGAAGVVALIAPGQSHGPGAEEAAATATLVQALGDAGVSGRLWAVTTGAVSIGTTDTPARPEAAAVWGLGRVAALEHPDRWGGLVDLPPTPGDHEVGGLIALLAGASQEDQVALRPGGSFARRL
BGC0001631.1	makasC	M3	BKR	M	Microcystis aeruginosa NIES-87	Cyanobacteriota	VMILSDRGGIGEALANLLPYPAILVEQGAGYAALGDNRFTVRPAQDEDYYQLFKALPTLPLRFLHLWGLDDANADTLEEIGVHAVLSLVRSLGGISSSQALRLDLVTHGAAAITGTEVLRPELAAAIGAARVLPYEYPNLTVRAIDVEPESPRSMAAAILSEIMRKGEHVVIGLRGERRWTPTF
BGC0001649.1	lavA	M1	EDH	M	Streptomyces lavendulae	Actinomycetes	TEAAGVLRPTVVEITPAASPGDAAAAALAAVQDWTAAGPGPDERLVLVTRDAVAAAPGDLVDDPAAASVWGLARTAQSEYPDRIIVVDLPGGAEAADAVEAAVRSGEPQLAVRDGLLLVPRI
BGC0001649.1	lavA	M2	EDH	M	Streptomyces lavendulae	Actinomycetes	EDGLEPAVPHRVAAVAGSSGGNVAETARALVHTVLDELRTVLAEDDGRRHAFVIAPDLAHAAVRGLVRSAQAENPGRLVLVEAAETADATLLDAALRTPEPELALRDGRILVPRV
BGC0001649.1	lavA	M3	EDH	M	Streptomyces lavendulae	Actinomycetes	DAAGPPRNGGGYTVVRVEAGTGDLPQRARHAVHHTLGVLRDRLAGDTAGRLAVVVGSDLAHAGVRGLVLSAATEHPGRFLLVDHPDGDGAGDVRDTVRALLDASGELEEQQVRVRDGELLVPRL
BGC0001649.1	lavB	M4	CKR	M	Streptomyces lavendulae	Actinomycetes	LPAFGEALDAGNAVRALVVPLAAGPDGEPHRLTGQTLELLRTWQADERFAGIRLVLVTRGAVATADTEAPDPAAAAVWGLVRSAQSETPDRILLVDTDAGLDADAEPVPAEVLAALLGADEPQAAVRSGRVLVPRL
BGC0001653.1	RS14725	M1	ER	M	Microbispora sp. GMKU363	Actinomycetes	DAPAPRVEHVPYTEGVPDAAAVHAVARHGLALVRAAVSDDRGGDDRPLVLVTRGAVAVDDDEDLADPAAATVWGLARSAQTEHPGRVVLVDTDGHEASERALAAAVATGEPQLALRAGVVHVPRL
BGC0001653.1	RS38650	M2	C2KR	MM	Microbispora sp. GMKU363	Actinomycetes	WLVVVRDGAEPTTFVVDVLRRHGATPVVTPLPVRERLETTGEIGGVVSLLDAGDTLTLLRALDEAGTDAPLWLVTRGAVAVGDEVVRAPAEAAVWGLGRVIGLERPARWGGLVDLPEILDAAAGSRLAAVLAGTSGEDQVAIRPGATLSTGCWARRL
BGC0001653.1	RS38650	M3	EDH	MM	Microbispora sp. GMKU363	Actinomycetes	PLPDGAYEEGAGENTADVTLAVCPETADAGEAARWALDLVRGRLAEDGPGEPGAPLVVVTRCAVATGTPGEEVDFAQASVWGLLRSAQSEHPGRFVLLDCDDLSSLAVPSGDDSPEAVVRALAAGEPQLAMRDGRLHVPRL
BGC0001653.1	RS38650	M4	A2KR	MM	Microbispora sp. GMKU363	Actinomycetes	WLVVAPESHLQDDVVAECVAALKRHGAIPETVPVDPAAPDRDALARALASEPAGVLSLLALDERPGPEGVPGGVAATLALIQTMAAAGARVPLWSATFGAVSVGADDPLRRPVHAQIWGLGRVAALEHPDLWGGLVDLPESLDDAACARLCAVLAGLGGPAGSGEEDQVAVRPHGVFVRRL
BGC0001653.1	RS14715	M5	EDH	M	Microbispora sp. GMKU363	Actinomycetes	WAVLGDPDWDLDVERHADLAGLAAERPDVVLAPCFGEETDSLARAATDGVHRVLRLLQEWLAEDRLADSRLVLVTRGAVAVGDGAWVEDPAAAAIWGLVRSAQAEHPGRFLLVDVDDDGHRLLPEVVASDEPQVAVRGGVPYVPRL
BGC0001653.1	RS14715	M6	EDH	M	Microbispora sp. GMKU363	Actinomycetes	WAVLGAAGRDLAEALDAAIHPDLDALAEAGVPDAVLLPVETAAETAAETAVETAGDLAVTASTATASVLAALRRWSADARFAAARLVVVTSGAFPSGTDPAAAAVWGLVRAAQSEHPGRFVLADLGDTAAARLLPAALATGEPQVAIGAGVVLVPRL
BGC0001653.1	RS38645	M7	ER	M	Microbispora sp. GMKU363	Actinomycetes	GVSVAYCGPLPEEAGDLAEAARVSVHRALDAVRDWLAQDHAEGDRLVVVTCGAVSAVPGDAAPDPAAAAVWGLVRCAQAEHPDRILLVDIDDRDTWTAGARGGTPAGLPLPVDAAEPQLAIRAGTAYAPRL
BGC0001653.1	RS38645	M8	0DH-BKR	M	Microbispora sp. GMKU363	Actinomycetes	LAVLGGPITGPDTGAITGPYAGVDAPVYPDLAALPDGDAAPDVVLVPFPRPTDPDADTAGAVRRAAEWALTLAQDWTASGRLPETRLALITRGAVATGPGDSASPDLAGAAVWGLIGSAQSEHPGRFLLVDLDGSAESHRNLDHVLASGEPRVAVREGRPLAPRL
BGC0001658	MteP6	M1	ZDH	M	Amycolatopsis	Actinomycetes	ASLGSISGFDVPVVDSLVSLVEVPDVVLLPVSVPGNNIAAAAKQTAHRVRTVLQQWLEGDRYAGARLVVLTRGSLADSAVRGLVRSAQAEHPGRVVLVEGTVTAATLATALGSGEPELRIDGDTVSTGRM
BGC0001658	MteP6	M3	ZDH	M	Amycolatopsis	Actinomycetes	WAVLGTDDLGLGVPLKAEPVDADVLVLPVGSGTGAVPSQVHQVVQETLRHLQNWLSAGDGKLVVVTRGELAQAPVWGLVRAAQAENPGRIQVVDLDAAAESARALPAVVASGEPEARVRNGEVRVPRL
BGC0001658	MteP3	M5	ZDH	M	Amycolatopsis sp. M39	Actinomycetes	GSTGNADGAKVLEVSIPDGSPPAAARAVTRQVLAAVRELLAGDGETRLAVITRGAVAVGGEDLDPVLAPVWGLVRAAEAENPGRFALVDLDGNGAAEPALATGEPETAVRGGKVFVPRL
BGC0001658	MteP6	M2	EDH	M	Amycolatopsis	Actinomycetes	VVAIGRGRVGVAATYSGFADLLGAVDRGEPVPGLVTLSVPAAAGAVPEAARANATWLLAEIQAWLAETRLTDTKLAIVTQAAVPAGESTASTASTVDVTQGLLWGLARAAQAEHPGRVFLIDADADTKVETIAAVVASGEPEAAIRAGSVLAPRY
BGC0001658	MteP5	M7	EDH	M	Amycolatopsis sp. M39	Actinomycetes	RPAETESTADTSDVQVLECAGESGTAAETHELTHRVLAALQTWLAEEHPEQARLVVVTRGAVPAAGDVTDLAASAVWGLVRSAQEENPDAFVLLDLDAETTPEAVLPQVLASGETQAAVRLGTVLVPRL
BGC0001658	MteP5	M8	EDH	M	Amycolatopsis sp. M39	Actinomycetes	WTVLGPDPFGLTEALGAKAAGSVAEASGLVVLPAGGTDDVHAELHRVLGLLQDWLAGSTGSLIVATRGAVAAEEGENPDPAGAAVAGLVRSAQAEHPGRITLADLGVGTPAGRTLAAVSASDEPQVALRAGAVLVPRL
BGC0001663.1	merC	M1	CMT-ER	M	Nostoc sp. UIC 10110	Cyanobacteriota	WLILSDQQGVAQQLATQLRSQGEICTLVSAGEKFEQITPQEFIINPNQPEDFQQLVAHTASQSPKLYGVVQCWSLEAGIDKNFNAQQLEALSQLGCGTTLSLVQSLVKGQSQQPRLWLVTQGAQPVPANKPVIQGVAQSSLWGMGKVIALEHPELKCVRIDLDPNQTTEQQGKTLWSEIWSEDKEDQVALRENSRYVARL
BGC0001666.1	mas4	M1	ER	M	Micromonospora sp. HK160111	Actinomycetes	CALVGSDTDALGVPAGWSRHADVAALVEAERDAASVADVVVLVVPASADEPDALSDTTGTVLTALQRWLSTPRSGAGPLVVFTRGGAAVHGAGELTDPTAAAVWAMVRSAQSEHPSRLVLLDADPGADLAVLVPAAVATGEPQLGARDGKLYVPRL
BGC0001666.1	mas4	M2	EDH	M	Micromonospora sp. HK160111	Actinomycetes	WATLADADDVAAMVAAAARVVRIDVPGDPGDAAMPQRLRAVTTGTLAGLRAVLDEPALASTVVLVTTRHAVATADGAPCDPAATAVWGLVRTAQTEYPDRIVLVDLGEAAGDEQALRRVVAMGQPQVALRSGVVLAPRL
BGC0001666.1	mas12	M3	EDH	MM	Micromonospora sp. HK160111	Actinomycetes	GPASTSLFEVGWTPIPIPATDGAHPRVTVVEARDTTDAPEPERARRLTAEVLASLQRWESDPEAGRHPLVIVTHQGVALRDGETTDPAAAAVWGLVRAAQAEQPGEITIVDADGVVPPDLPATLSRAGEPQLAVRGDRAWAPRL
BGC0001694.1	AbmB1	M1	EDH	MM	Streptomyces koyangensis	Actinomycetes	AGLDELLARTGDAAGPEPAPLPGAVLVRAVETAAGTGTAPEEVHAAVERALGLVQTWLADPRTEASRLVLVSRYAVHTEDATGAGPEAANLAGAAVWGLLRSALTEHPGRFALLDVDADLPDGAAVHPEVLAASEHEPQLALREGALYAPRL
BGC0001694.1	AbmB1	M2	EDH	M	Streptomyces koyangensis	Actinomycetes	LTVDPAAGLTSPEAAHELVGRALERVQRHLADDPDGPEHGATSHAGTRLVVVTYRAAQVPTGPESAPVAGEAATLVRPESAAVWGLLRSAQAEHPERFVLVDSDETEASEAVLAAAVASGEPQLALREGVLYVPRL
BGC0001694.1	AbmB1	M3	EDH	M	Streptomyces koyangensis	Actinomycetes	VVVLPATGPEAFAALDALAADATKVPEVVAVHLAGTPHGEAEGDAARAETSGTADAARGTTRDVLALVQKWLAEEAFAGSRLLFVTRGAVAAGAGDAVPDLRTAPVWGLLRSAQSEHPGRFALLDVDEDAAPDLVADGAEGGALTAALATDEPQLALREGAFLAPRL
BGC0001694.1	AbmB2	M4	0DH-C1KR	MM	Streptomyces koyangensis	Actinomycetes	PAVGVLGPVPGGGPLHDPDATVPYADLAALRQAVADGAPLPGAVLLLAGTPGMGDDADPEQLGAAVGGLLATLQDWLAEERFAAARLVVLTDGAVATDGTGPASPVGAALVSLVRSAQLEHPGHVVLVDVPGATLPPPLLAAALATGEPQLAVRGDALLAPRV
BGC0001694.1	AbmB2	M5	ER	M	Streptomyces koyangensis	Actinomycetes	TVIVGADPYGLAERGTPAYPDLDALLADGPRAGGGRGPADVLAFLGHDLVDDPWDGRPVAGVASADADPHGAPDRVRALLEEGLALVQRWLTAEEHDTHPAGDGTAGPRLVVVTRGAVAARPGERITSLAGAALHGLLRSAASEHPGRIVLVDLDDDEDAVRALPATLAAATDEAELAVREGSVHVPRL
BGC0001700.1	npmE	M10	AKR	M	Streptomyces sp. IMB7-145	Actinomycetes	WLVVVPASRAEDEVVAGVSAGLERHGAGVVSLVVDERDLDAKVLAGRLREMVAELPELGGVLSLVALDEESCPGYPALSGGSALSLTLAQAMVEAEVPARLWCGTRGAVSVGRWDALAGVVQSQVWGLGRVVGLEHSAVWGGLVDLPEALDERGAARLAGVLAAGDGEDQVAVRGSGVFARRL
BGC0001700.1	npmF	M11	BKR	M	Streptomyces sp. IMB7-145	Actinomycetes	WLVVLPASGVDDAFAESVSTALQRHGADVVRVVADEDDLAPGVLAERLREIATGLPGIGGVLSLVGVDERPCTEHPVVSRGLALTLMLVRALAEADIEARLWCGTRGAVSVGRSDQLTSTTQAEIWGLGRVAAMEHPRIWGGLVDLPESLDERAAARLLWTLSAEGGEDQVAVRGSGAYARRL
BGC0001700.1	npmF	M12	AKR	M	Streptomyces sp. IMB7-145	Actinomycetes	WLVVVPASRAEDELVTEVLSGLERHGAGVVSLVADERHLEAEVLGERLRGAAADAPALGGVLSLLALDEEPCPGHSALPSGLALTLTLVRAMADAGIEAPLWCGTRGAVSVGRSERLSHPKQAMVWALGRVAALELPQLWGGLVDLPESLDERAVARLAGVLAAEATEVVEDQVAVRGSGVFARRL
BGC0001700.1	npmF	M14	B1KR	MM	Streptomyces sp. IMB7-145	Actinomycetes	WMVVVPPVDTARELAERIARDVERHGARMVRVDLDESEPERSSLTELLRDAAPRTLSADGSEQEGTLAIDGVLSLLALDEEALAEHPGVPRGFAGTVTLVQALSDIDIDVPLWLATTGAVSVGRSDRVGSVKQSLVWGLGRVVGLEYAQRWGGLVDLPESPDAIDDRVLNRLVGLIGRSGDEDQVAVRASGIFGRRL
BGC0001700.1	npmF	M15	ER	M	Streptomyces sp. IMB7-145	Actinomycetes	WAVVGTDPYGLAAGEIAGAEVTAYADLEALGAAIDGGATAPEAVLVSYAPGLDDPAAQGTPRSKAKGKGKGKAKQGLEPADAIHAVTHHTLGMIQGWLGDRRFASSRLVFVTSGAMAPEDRDETPDMIHAPLWGMVRSAQSENPDCFVLVDLDPQEPAEASKAALSTVLAGDELQAVVREGTVLGQRM
BGC0001700.1	npmG	M16	A1KR	MM	Streptomyces sp. IMB7-145	Actinomycetes	WPVVVPASRAGDELVSEVVVGLERHGANVVSIVVDERDLDAEVLAERLREVAADAPELGGVLSLLALDEEPCPGYPALSGGYALTLVLVQAMVGAEIPARLWCGTRGAVSVGRSDRLTSPTQAMVWALGRVAGLELAPLWGGLVDLPESLDERGAARLAGVLSVEGGEDQVAVRGSGAFVRRL
BGC0001700.1	npmG	M17	BKR	M	Streptomyces sp. IMB7-145	Actinomycetes	WMVMVPDSHADDELVTSAVNTLERQGAQVARIVLDGAVDIDRAAVAERLRTAAEGASDGTVGGVLSLLALDENPRPDHAVVPRGLALNLLALQALVDAGVEAPLWVATRGAVSVTGSDTLRSAAQAQMWGLGRVAGLEHPRLWGGLVDLPERLDERAANRLAGVLGGGAGEFEDQVAVRTSGVFTRRL
BGC0001700.1	npmH	M18	B1KR	MM	Streptomyces sp. IMB7-145	Actinomycetes	WAVVLPASHADDALVTATVNGLETSGADIVRVVLEEKGNDRWSVAERLRGALDEAGVEPSGVAGVFSLLGLDESGHATFGVVPAGLAAMVALVQGLGDAGVVAPLWCGTRGAVSVGRSDRLVSPAQAMVWGLGRIVGVEYPQRWGGAVDLPETMDARAVARLAGVLAGTEGEDQVAVRGSGVFAKRM
BGC0001700.1	npmH	M19	EDH	M	Streptomyces sp. IMB7-145	Actinomycetes	WAVLGTDDLGVLSSFAAEGADVASYADLAALREAIDSGATAPDVVMVAGAAEAVGIDDGADLAGRVRGTTYRALELVRTWVTDDRFDDSYLVFVSRGAMGAQSSGEVRTPAEAAVWGLLRSAQTEHPGKFLLVDLDPQEHGEVSSVLRTALTAGEPQVAVRDGRVLAARL
BGC0001700.1	npmB	M3	ER	MM	Streptomyces sp. IMB7-145	Actinomycetes	CAVAGPDVFGLARALKAADGSVEEHADLAALAAHVGSGAPLPNLVFVTVSSAPGEDVVPATRAVAHQTLDMVRAWLTEDRFAEARLVLVTRGAMATEDGVDPRDLAAAPVWGLVRSAQAENPDRFVLLDVDGGEESLALVHQAVSTGEPQLAVRGAEMLVPRL
BGC0001700.1	npmC	M4	B1KR	MM	Streptomyces sp. IMB7-145	Actinomycetes	WLVAIPEACGDDALVAAVLDGLAGRGAHVVRVAVGAADDREVMTERLRGALDGVAVEPSAVAGVFSLLGLDESAHESFAVVPAGLAATVALVQALGDADVVAPLWCGTRGAVSVGRSDRLVSPVQSMVWGLGRTLEAEYPQRWGGVVDLPETMDARAVARLAGVLAGAEGEDQVAVRGSGVFAKRL
BGC0001700.1	npmC	M5	EDH	M	Streptomyces sp. IMB7-145	Actinomycetes	WALVGPDRAEVAGVLGSADGTVDTYPDLAALAQAIDAGATAPDVVLASTVSGTRRTQDLAEAVREAGHRALDLLKSWLADDRFGASRLVFLTRGALAAGEDTDVADPAAAAVWGLVRSAQSENPDRFVLADLDDQDGSRRILPAALTTDEPQIVVRKGTVLAGRL
BGC0001700.1	npmD	M6	EDH	M	Streptomyces sp. IMB7-145	Actinomycetes	ADRAEPVPEAEVVRVVSSGADVVGEVYGEVLEAFDRVRSWVADQGSADGRLVVVTRGAVDVGDGVRDLAGAAVWGLVRSAQAENPGRLVLVDSDDLDGVDGLLPGLLARGEEQLVVRSGVVRVPRL
BGC0001700.1	npmD	M7	B1KR	MM	Streptomyces sp. IMB7-145	Actinomycetes	WLVAVPKVCGDDALLASVVDGLAGRGAHVVRVVVDAADGREVMTERLRGALDETGVDPSGVAGVFSLLGLDESAHGSFEVVPAGLAAMVALVQGLGDAGVVAPLWCGTRGAVSVGRSDRLVSPTQAMVWGLGRIVGVEYPQRWGGVVDLPETIDSRAVARLAGVLTGAESEDQVAVRGSGVFVKRL
BGC0001700.1	npmE	M8	AKR	M	Streptomyces sp. IMB7-145	Actinomycetes	WLVVVPASRAEDEVVAGVSAGLERHGAGVVSLVVDERDLDAKVLADRLREAVAELPELGGVLSLVALDEEPCPGYPALSGGSALSLTLAQAMVEAEVPARLWCGTRGAVSVGRWDALAGVVQSQVWGLGRVVGLEHSAVWGGLVDLPEALDERGAARLAGVLAAGDGEDQVAVRGSGVFARRL
BGC0001700.1	npmE	M9	BKR	M	Streptomyces sp. IMB7-145	Actinomycetes	WLLVVPAGLAEGEVTTSIRQGFEKHGSRVVPVAVTADTDTDGLAQALLGALDGESEVGVMSLLALDEEPCAGEPLVAAGLALTLRLVQALAGLEVGVRLWCASRGAVSVGRSDRLTSPVQAEVWGLGRVAALEHPRIWGGLVDLPEVLDERAVGRLAGVLSAEGGEDQAAVRGSGVFVRRL
BGC0001702.1	NcmAI	M1	B2KR	MM	Saccharothrix syringae	Actinomycetes	WLVVVPAGSPDHPLPADAVVVPVEPGLGRRELAARLTATLDRPPAGVFSMLGAHDDAEVADTLALVQALGDAGIAAPLWCATRGAVGPDEPTAAPRQARLWGLGQVVAQEHAERWGGLVDLPAEVDARTARRLWAVVTGSAGERQVALRRSGVFGRRL
BGC0001702.1	NcmAII	M4	0DH-B2KR	MM	Saccharothrix syringae	Actinomycetes	WVVVGDDDLKVAAVLGAAGVRVDATADLAGAAAADGACASVTPAEGDPDPATAVRTTAGAVLRLVRDWLAEDRAAARLVVLTRGAVAVDGEVPDPVGAAVWGLVRSAQREHPGRFALLDLDDHDASARLLPAALAAGEPQAALRAGGLRVPEL
BGC0001702.1	NcmAIII	M5	A2KR	MM	Saccharothrix syringae	Actinomycetes	WLVVTGPVPDAAVDLVVEALRAHGAEPVPVVGGGDRTPWAEVAGGCAGVVSLLALDDTAHPAHPALSRGHADTLALVRALGDAGVAAPLWVVTRGAVGTPGEPPTSPAQAAVWGLGRVVGLEHPERWGGLVDLPAVPDAATGAHLAAAFAGGEDQLAVRAAGLLARRL
BGC0001702.1	NcmAIV	M6	EDH	MM	Saccharothrix syringae	Actinomycetes	TAVLPAGGDLADLADPVPEVVVAEVAPPGAGLPADAHATAHRALGLVRGWLADDRFADARLVVVTRGAVATGSGAAPDPAVAPVWGLVRTAQTEHPDRFVLLDVDGDLPPAAPAAAVRSGEPQLALRAGEWFAPRL
BGC0001702.1	NcmAV	M7	EDH	M	Saccharothrix syringae	Actinomycetes	FVPERIAVRPGPAGARAATLAAVELVRSWLADPRSRTDRLVVVTGGDLAGPAPDPVAAAVWGAVRTAQAEHPDRFVLLDTDDDPGSAALFDAALATGEPQLALRGGEVLVPRL
BGC0001750.1	pynG	M2	EDH	MM	Nannocystis pusilla	Myxococcota	WIVVGDPDDLAPLTAALVHRSQRITAVALDRLTDDLAPALAGAAPRGVVCMIPQRASDLGERGWLGALDIIKTIVGRDAAPRLWLVTRQAHDLGGESFENDPSAAMAWGLGRTVAYEHPELRCTRVDVLADPSAFTQLAGELLADRDDDEVALRPGGRRIARI
BGC0001750.1	pynI	M4	0DH-B2KR	MM	Nannocystis pusilla	Myxococcota	WLLLADPGPLADAVIAGLRAREQACEQLPLRLAADPDTLVQALESRREGLPLRGLVHLGALGPGTSVPPAAHGTSAPPDAALAAELLDPAALDAAQRRGYGVGLHAVQALARLAWRDPPRLWFVTQRLAVLPDAATIDPTHAPLWGLGRTVPFEHPELRCKRVDIDGDLATLDALVAELCADDPEEEVALRGARRHLARV
BGC0001759.1	RmpB	M5	0DH-A1KR	MM	Amycolatopsis sp.	Actinomycetes	SLVDKAVPDRVEVVEAFGEEPLDLTARVLEAVQTFLADAAEEARLVVVTRGAVREVTDPAGAAVWGLVRAAQAENPDRIVLLDTDGEIPLGAVLASDEPQVAVRGGKYFVPRI
BGC0001759.1	RmpB	M6	0DH-B2KR	MM	Amycolatopsis sp.	Actinomycetes	TATAEDAEVLEVAGGDSALAATTRVLEKLQSWLAGPEAERLVVVTRGAVPAGGDHTLTDPAAAAVWGLVRSAQAEHPDRIVLVDTDGDLPVDTVLASGEPQLAVRGTTLLVPRL
BGC0001759.1	RmpC	M7	0DH-A2KR	MM	Amycolatopsis sp.	Actinomycetes	TVDSAVPPGPAEVLEASGEGPLDLTSRVLEAVQKFLAEAEEDARLVVVTRGAVCEVTDPAGAAVWGLVRAAQSENPDRIVLLDTDGDVPLDAVLATGEPQLALRGTTFSVPRL
BGC0001759.1	RmpD1	M8	0DH-B1KR	MM	Amycolatopsis sp.	Actinomycetes	GSPQADGVADVLEVPGGDSPLAATSRVLEKLQTWLTEPEAERLVVVTRGAVPAGDTPVTDPAAAAVWGLVRSAQAENPDRIVLLDTDGEIPVGAVLATGEPQLAVRGAALYVPRL
BGC0001759.1	RmpE1	M9	EDH	M	Amycolatopsis sp.	Actinomycetes	ADHVEVLEASGEADPLELTGRVLEAVQKFLADAAEEARLVVVTRGAVPAGDGVVRDPAGAAVWGLLRAAQAENPDRVVLLDTDGAVPLGAVLASGEPQVAVRGTTLTAPRL
BGC0001763.1	rufE	M1	EDH	M	Streptomyces atratus	Actinomycetes	CWVLGSAFGTGFTAVPDVAEASARIDAGVRPPAAVLVACLPAAAADRGAQIPDDVRRAARGTLELLQSWLGDDRFAYTRLVFVTRGAVRTGTGSDEAPVDLVHAPLWGLVRTAQSEEPGRFVLLDLDEGLDTTHLGHDVLAAVATGDEPELALRGGALLVPRL
BGC0001763.1	rufE	M2	ER	M	Streptomyces atratus	Actinomycetes	FALIIPGGATTPPPYDALHTLDAEHRSDVAQLVRQASTGVPDAVVVPCPAGAMGDVGEVVGGVLAVVQEVLAEPALARCRVVVVTRHAVGTGEDDPAGDAAAAAVWGLARCAQQEEPGRVQLVDIDPSRESAESLGRAIRSRLAQVALRKGEWLTPEP
BGC0001770.1	SceN	M1	EDH	M	Streptomyces sp. SD85	Actinomycetes	TAALSDVLDGAWAGPVPDAVVHRAGDHDGDFATAGLAAAGEALRALQAWLPDDRCAAARLVVVTSAGPAHAPVRGLVRSAQAENPGRFVLLEHDGPHTAPSDADLSAALATGEPELTLSGGELHVPRL
BGC0001770.1	SceN	M2	EDH	M	Streptomyces sp. SD85	Actinomycetes	FAVLGTDDLGVGLPASPDLASLAAAAPDVVLLPVRPDSGDVPAAVRSALHGVLGVLQEWAADERFAAAKLVVLSGTGLAGAPVGGLVRAAQAEDPGRIVLAATGDEPPSLAALAAALDSGEPEVVLRDGEVLVPRL
BGC0001770.1	SceO	M3	EDH	MM	Streptomyces sp. SD85	Actinomycetes	HVVLGDGGLDALEEVPAYAVLPVSGSGDPLAATRAQAGRVLETVRQWLADDRAASSRLIVLTRGAVAVGAEDVTDLAAAAVWGLVRAAQAENPGRLVLVDADAAATPGDAAAAAETSGEPQLALREGRAHVPRT
BGC0001770.1	SceQ	M5	0DH-CKR	M	Streptomyces sp. SD85	Actinomycetes	LAVLGTDDLGLAAPLHPGLASLGGPVPDVVVLPVAPSEPGDDVPAAVRATLAPVLAALKDWLADSRFDRSRLAVVTRAGDLAHAPLAGLVRAAEAENPGRFLLVDTDGGDGLAAALTCGEPEVAVRDGALQAPRL
BGC0001770.1	SceS	M7	EDH	M	Streptomyces sp. SD85	Actinomycetes	SAGTGHRLLESTPGSDADAVRAATRTALEALQDDDPRTLVVVTRGAVSVAGEDVPDLAGAAVWGLVRSAQSENPGRFVLLDLDAAADTGTSVQLALATDEPQVAVRDGAAHAARL
BGC0001770.1	SceS	M8	EDH	MM	Streptomyces sp. SD85	Actinomycetes	EVLHAAAGTSAEEVREGVAGLLDRLREGLAGDAPLVVVTGPDLAGAAAAGLTRSAQTENPGRIVLVENGGTDTPDDDALAAALAAGEPHVALRGGTVHVPRL
BGC0001770.1	SceS	M9	EDH	M	Streptomyces sp. SD85	Actinomycetes	WAVLDDGRGIAGALEGEVAAVHAVTDLDEAAAHLPAPAGVLVLPYTGGDGPQAVRSGTAGLLGRLRAWLADPRFEASTLAVVTGGAVSTDGEDVTDLAAAAAWGLLRSAQSEHPGRIVLIDLDAHAGPDAYRLLPAAVATGEPELALRSGVLSAPRL
BGC0001784.1	StmA	M1	B2KR	MM	Streptomyces seoulensis	Actinomycetes	WLVVTPDGDHDAAWARAARDGLLAGGAEVVELRLGAEDRAALGGRLPRDVDAVLSLLATGDAVAPRHGAVPTGTAATLTLLHALADAGLDVPLWTLTSGAVAVDREDALRNPAQSQVWGLGRVVALEQPERWGGLVDAPAVPGEQALAWLLTVLAQRDEDQVAVRGSGTFTRRL
BGC0001784.1	StmA	M2	EDH	MM	Streptomyces seoulensis	Actinomycetes	SAALADDVTHLDVLDAAGVSSLAAGLTAEDGPEPPSLVFARLDRGREGSVGLSAEAAHAAVRRTLLLLQAWLAEPALEESRLVLVTRRSVSALPSDPVDPWSATVWGMVRSAQTEHPGRFVLADVDGDETSEQVLPIAVAGGEPQVAIRRGNTLRPGL
BGC0001784.1	StmA	M3	EDH	M	Streptomyces seoulensis	Actinomycetes	DADVVRIDGRQSAPMEVAEAARVTAETALGSVQDWLARQPDARSRLVVVTDGLAGEDPARRLPAAAVWGLVRSAQVEYPGRIVLIDGDGPLAAAVASGEPQIMLRPEGAFVPRL
BGC0001784.1	StmB	M4	AKR	M	Streptomyces seoulensis	Actinomycetes	RPLVFLPADDAESPLVAAVVETLPPDAVLVPCAGAASRASMASMLTEHKPRHAVSLLALGSAPAAATLALVQACSDVGLDGSLWCLTSGAVSVGPADQLRNPDQASVWGLGQVAGLEHPDWWGGLVDLPERLDPRASARLAAVLAGQWDEDQLAVRPSGVFARRL
BGC0001784.1	StmB	M5	AKR	M	Streptomyces seoulensis	Actinomycetes	WLVVAAPAQHEHPDVIAVLAALRAGGADPRIVDPAGADTPGAVGAVSLLAWDEEPDAAHPVMSRGLTATVALVQALQRAGSTVPLWCLTRGAVAIGRSESVRVPAQARFWGMGRAVALEWPDGWGGLVDLPDHLDDRTLSRLPSLLAGEGGEDQVAVRASGVFARRL
BGC0001784.1	StmB	M6	EDH	M	Streptomyces seoulensis	Actinomycetes	EFTMLGAENESSDATHSLLLVNHGQDLDPEAAMAAAADVLDTLRSRAQERVLVVVTSHAVAVDGDPAPAGAAVWGLVRAAQVEAPGRIVLVDLDGEERSWRALPYALSSGEPELALREGELRVPRL
BGC0001784.1	StmC	M7	EDH	M	Streptomyces seoulensis	Actinomycetes	EIVCLPASVGDDPVDSAAQTLAALQRWVGAEQAPDARMVVLTTGSLLLDTDAPAETSTSLANAALCGLTRSAQSEHPDRFVLVDVDDPESDWRSAVAAAVAAGETQIAVRRGEAYVPRL
BGC0001784.1	StmC	M8	EDH	M	Streptomyces seoulensis	Actinomycetes	WWVMLGDDELGLTSLLRGANSRIETYAGLDDLAAAAAASGAQPDAVFCAPAATTGADVPAATAQLASRALALLRTWLADQRFATTRLVLLTRNAATDPAAAALAGLVRAAQAEHPGRLAVLDVDAGTTRLDHRVLAGALASGEPHVRVGDDVARVPRF
BGC0001785.1	stvE	M10	EDH	M	Streptomyces spectabilis	Actinomycetes	RVTVATAEEVATLADDVESGAAAAPAAAVLDAVGGDEEDAALSLASRVLDVVQCWLAGTGLEESRLLVVTRGAVPAGDGAVTDPAGAAVWGLVRAAQAENPDRIVLLDTDTDTDTDAGTDTDAGTDTDTGIDFDADTERVLGTVLASGEPQLAVRGTRFSVPRL
BGC0001785.1	stvB	M5	0DH-B1KR	MM	Streptomyces spectabilis	Actinomycetes	WMPVAAADEVATLTDEVAAGAAAPMAAVLEAFGGGDGEELALSSHVLGVVQGWLNGAGLEESRLVVVTRGAVPAGEGAVTDPAAAAVWGLVRAAQAENPDRIVLLDLDPASDDAAGSVLDTVLGAVLATGEPQIAVRGTAFSAPRL
BGC0001785.1	stvC	M6	0DH-B2KR	MM	Streptomyces spectabilis	Actinomycetes	WAPVTTPDDVALLPGNGPAVAVMEALGGDEEDAVLTLTSQVLAVLQAWLAEAALEESRLVVVTRGAVAAGGEDMVTDPAAAAVWGLVRAAQSENPDRIVLLDTDPTADTAPDTTPDTSPDAVLGAVLACGEPQVAVRGGALLLPRL
BGC0001785.1	stvC	M7	0DH-A2KR	MM	Streptomyces spectabilis	Actinomycetes	WMSVIAADEVATLAEEVAAGAAVPMAAVLEAFGGVGGEDAVLALTSQVLEVVQGWLAGAGLEESRLVVVTRGAVPAGEGGVTDPAAAAVWGLVRAAQSEHPDRIVLLDLDPASDDEAGSVLDTVLGAVLATGEPQIALRGTTLSVPRL
BGC0001785.1	stvD	M8	0DH-B2KR	MM	Streptomyces spectabilis	Actinomycetes	WAAVATAAEVAALAGSPTVPPVAVLEAVGDDGADAVLALTSRVLAVVQAWLAEAGLEESRLVVVTRGAVSAGEDAVLDPAGAAVWGLVRAAQAENPDRIVLLDTDPVSQEGLASLLGPALATGEPQVAVRGATLSVPRL
BGC0001785.1	stvE	M9	ZDH	M	Streptomyces spectabilis	Actinomycetes	WVPVATADDVMALDRSATAPPLAVLEAFGGEGEGAALALTSQVLEVVQAWLTGAGFGDSRLVVVTRGAVPAGDGAVTDPAGAAVWGLVRAAQAENPDRILLIDTDPTAEGDLDAALGVALASGEPQVAVRGATFSVPRL
BGC0001793.1	swnK	M1	AKR	M	Nostoc sp. UHCC 0450	Chaetothyriaceae	WGLVCPSGETLWTNKARKALSNTGIQLVPVTKLQEAEHLEGVLSLWDSDADVVQMAHDFTAKALSQLQEAIGIGFDMPVVWVTRHAVGAGAGDRPVKVGAGPLWGLMGTARSEHPELHLRLIDVDEEADLATIGFALMLDDLPEIAIRKEQLLTPHM
BGC0001807.1	TotA1	M1	EDH	MM	Streptomyces pactum	Actinomycetes	WAVLGDGDGAPVLEALRGAGAAPDAYRDLDGLLAALDAGATAPDLLVWTVGDRHDDTVTAAHDHTATALATARALLLDERLAGTRLLAVTEGAAGPNPATGVAAATVWGFLRTAHTETPGRFLLADTDRDPASLRLLPAVAAGDEPQVALRAGRAHAPRL
BGC0001807.1	TotA1	M2	B2KR	MM	Streptomyces pactum	Actinomycetes	WLLAVPADSAAAADCADAVAAAVRDHGGDVTTLTLAADATRDDVVRLLPDGSFAGVLSLLTVTDGTARGRVERTGLTTTVALFQALGEAGARGPLWCLTHDAVTATAEDARTARDAAAAQHMVWGLGRIAALEHPERFGGLVDLPARPDGRTGRLLAAVLAGDSGEDQVALRPSGALVRRL
BGC0001807.1	TotA1	M3	ER	MM	Streptomyces pactum	Actinomycetes	VAVLGETAPGLPATDPAFAGCADLGALAERLADGGTAAPGHVLVDLRTGVSQDTGGDMAADAERTALHALDLVQQWLSGEHFAQSRLVLVTGGAVHVHDAERMDHLAAAPVWGLVRSAQTEHPGRFVLLDVLGHTPAAPETVLRALSSSEPQLAVRGDEILAPRL
BGC0001807.1	TotA2	M4	ER	MM	Streptomyces pactum	Actinomycetes	APVLAFVGPEIPGAGLDAGTSRHDDLTGLAEQLADGRCPAPAYVLASTAQGPALPAGAEGDTAQEALAAAGRALDLVQSWLADEAFAATGAKLVLLTRGAVAVGPGEGVPGLAATPVWGLVRSAQSEHPGRFVLADLDHDPGSLAALPSALGTGEPQLALRRGEALVPRL
BGC0001807.1	TotA2	M5	CKR	M	Streptomyces pactum	Actinomycetes	WILPVHAEQADDPWVTGLVAALSAGGVRPVLLPCAGDAALAGLLRSATGDAGPVSGILSLFALAPGRHPAHDALPQGTVLTLALLRALEESGSRVPVWHATRAAAAVGPAERVHHPEQLAVRALGRVAVLESSRHWAGTVDLPERIDAWTGGRLAAVLAHSAADGERGSGHESENDIAVRGAGLFARRV
BGC0001828.1	zinA	M1	ER	MM	Streptomyces griseus	Actinomycetes	WCAYGDELPDPVPPTVVARVQTGPDVADAVNHALRTVQRWLADERCARSRLVLAVRGDTPAEAAVAGLVRSARTEHPGRFVLVHLPADASDADAASAASGDEPEIRSGAGGPTVPRL
BGC0001828.1	zinF	M10	ER	M	Streptomyces griseus	Actinomycetes	AVVLGAASELDDVAARGIPELLVTYVDPAADVRRAVGDTLVLLQRLLGDTRYDTTPLAAVTRAGALAHTAVWGLLRTAQTENPGRFFLLETDQDLYDVAEVASAVATGESQLRSAEGRLFGPRL
BGC0001828.1	zinB	M2	EDH	MM	Streptomyces griseus	Actinomycetes	DIVFLDTGAPDLDTVATPDGPAPDVVALALPDDATDVRDLVGSVLALVRRWLSDDRWSTSRLAFVTRRDSLAHAAVRGFVRSAQTEHPGRFQLLETERDSEPSPDAVAAALATGEPQLALGPTGVSTPRL
BGC0001828.1	zinB	M3	A2KR	MM	Streptomyces griseus	Actinomycetes	WIVVVPESAGDDDTTASLVRMLGARGADAVTLTVTEEDADRTRLAGRVQEALAGRHDLRGVLSLWAFDEKPTETQPLVSAGLAGTVSLVQALRDLDATAPLWCLTRGAVATAPSETLTSAVQAQVWGVGRVAALEQSGVWGGLVDLPDTPDERALRRLCGILAEPAGEDQLAVRAGGVVARRM
BGC0001828.1	zinB	M4	EDH	M	Streptomyces griseus	Actinomycetes	WAVLQHPDADVLSALKDAADSVDTCADLDELIALMDAGTAAPDTVVLAMPSTTGAVDDGLTAAVHRRTAEALATAQRWLADERFAGSRLVCVTRGAVSTAGDAVTDLPGAALWGLVRSAQAEHPARFALVDIDDSVVSWDVLAEAAASGQDQLALRAGTRLTPVL
BGC0001828.1	zinC	M5	ER	M	Streptomyces griseus	Actinomycetes	TVAEWALDARDPYAVDVTDATHPVAATPVTDATDATHTAAPTHATDGAEAPELVIARVPRDLGVREAVDRTIALARLRLRDRNPGADAPLLVVTHGDDAAHAAVRGLVRSAQAEHPGRFLLLDTDDDTLPAERIAALVAPGEDHIRLRGGEVQVPRL
BGC0001828.1	zinD	M6	B2KR	MM	Streptomyces griseus	Actinomycetes	WIIVSPDAAGPQVWHEAAQRALRDAGARVTLLTPDAATADRHMLAAALRTAAGDGQVSGILSLLALDGRTHPGQTTVTTGYAASLALIQAAADSELGAPLWCATRGAVGTRPDEPPLDAAQAQLWGLGRVVALEQPQLWGGLVDLPEQADSTALRLLATALSGRDGEDQLALRATGLLARRM
BGC0001828.1	zinD	M7	A2KR	MM	Streptomyces griseus	Actinomycetes	WLVVSPAAEREGATTPALVRALEDRGADVRLLEVSAGDADRTALATRISEAADGDVPFSGVVALWGLDDVPHPDFPALTGGSLGSLALLQALHDLGAEAPLWLLTRDAVAVSDSDGLSGAAQAQLWGWGRVAALEHPKLWGGLMDLPAVVDERALRLAVGALAAPSGEDQIAVRAAGVFGRRL
BGC0001828.1	zinE	M8	A2KR	MM	Streptomyces griseus	Actinomycetes	WLLVVPEDHVAVPFVDATLRGLEAAGADAHLLPVAAADADRGKLAARLHEAVGDGRDLTGVLSLWSLDGSPLPGSPTLSTATLGTLALLQALADTDLTAPLWCVTRGGVATDDITPAEPVPAELWGMGRVAALENARLWGGLVDLAPDTDDATAVTEITAALRRTDAEDQIAVRGGRPLGRRM
BGC0001830	spr7	M1	B1KR	MM	Salinispora pacifica	Actinomycetes	WLLVSDTVTADLDLVTDLTAVLRQRGAEVRLLAVDPLEDRAHLAELLATKADEAALLTGVVSLLGLVTTPHPEHPSIALGMTASLTLVQAMGDAKVLSPLWNVTQEAVAATPREVPDVSGAQVWALGRVAALELPDRWGGLVDLPQAPETRVLDRLADALGRGDGEDQIAIRGFEVYGRRV
BGC0001830	spr7	M2	EDH	MM	Salinispora pacifica	Actinomycetes	WAIVNPHGADMVDAATRYGWPVAAIDAYADLASLRAALDAGAEQPTVVVADFRRGTGATEPAHLAESVRAETCAGLDLLQDWLADERCMAAKLVVLTQRAIAVDPDEDGLDLTHAGLWGLLRSAQSEHPDQFVLLDVDADDCSIRAIPSALALDMPQLAVRAGEIRVPEI
BGC0001830	spr8	M3	EDH	M	Salinispora pacifica	Actinomycetes	FALVGIEHPALLAALAAEAPAQAYQDLDGLAAAVGDGPAPSYVVVSLGLVSDTSPTRDVTAAGADRAAQQALELVQQWLADDRFAGSRLVVLTTGAVDTGTGVADPAAAGAWGLLRVAQTEHPQRVIAVDIDEHPDSLRMLPQLLTLDEPQLALRAGTASVPGL
BGC0001830	spr9	M4	C2KR	MM	Salinispora pacifica	Actinomycetes	WLLVVPEPLIGEEVTSGVQQALAARGATVDLLAVNPTTDRARLAEHLIAAATTADDPGQDGLAGVLSLLALTEGDEPNHPAVPLGSTATLALIQAVADTDMSASLWVITRGAVSVSSQETPDVKQAPVWGLGRIAALELPDRWGGLVDLPENLDTRAYHHLATVVAGAGGEDQVAVRGSVLRGRRL
BGC0001830	spr9	M5	ER	MA3	Salinispora pacifica	Actinomycetes	WAVLGEEDPGLTGGLSRTGVVCDAYPDLAALVAAVAGGAAVPDVVCVSVVSASPVGPAAVRTVVLRALNLIQEWLAVEGRLSSATLAFVTTTAVAVGDGTVKVDPVPAAVWGLVRSAQSEEPNRFVLVDVDTDAASVSSLPAALAAREPQVAVRGGTAYVPRL
BGC0001830	spr10	M6	A1KR	MM	Salinispora pacifica	Actinomycetes	WLLVTGPDESTPLVEAALTARGAQVQHLTVDPATADRASLGALLAAGGSGASGVLSLLGSDRRPHPDHPDVSVGTTATLLLTQAVADAVPTARLWTVTRGALAVAPTEVPDEHQAQVWGLGRVAALELPQLWGGVVDLPVASDEQIWDGLADVLAGAEDQVALRGPAAYGRRL
BGC0001830	spr11	M7	AKR	M	Salinispora pacifica	Actinomycetes	WILVVPRHPGPTSLADDAERALLRAGATVTRLTVDADVTDRDALARLLAGTESDPRPDGLLSLLGEDDRAHPRFGRVPSGVLATLFLTQVLADQALSAPLWCVTRGAVAVTTGESSSVAGAHIWGFGRVAALELPKGWGGLVDMPSEPADRDWDLLGHTLAGAEDQVAIRSGVAQARRL
BGC0001856	scaP1	M1	A2KR	MM	Streptomyces caniferus	Actinomycetes	WLLAVPSGYEDDALVRGARQALEEAGARTHALTVDDSDGLAALSRTAAGPFTGVLSLLALDERPDRTQPCVPSGLSRTLALLQALGDAGIDAPLWCVTRGAVATGTTAGPADDAGTADSPGDTEGDTAADHAPTHPDQAGIWGLGRVAALEHPERWGGLVDLSGHLPGQVAVDGREVALLARILAAGGDEDQLAVRGAAVYGRRL
BGC0001856	scaP4	M10	AKR	M	Streptomyces caniferus	Actinomycetes	WLVVVPEAATESGWASSVLAGLAACGVRFERVECGPDVDRVALAERCAEFSGEAVAGVLVLPSGVAGETARGVPASVWWTTVVVQALGDAGVGGRVWVVTRGAVAVGGPDAAPDPVGAAVWGLGRVAALEFPERWGGLVDLPEAVDGRVLDRLAQVLAHGSEDQVAVRVSGVFGRRL
BGC0001856	scaP5	M11	BKR	M	Streptomyces caniferus	Actinomycetes	WIAVLAAGDAYAEAVVDGLAACGVRVERVECAEGETDRRLLATRVRAAAGDEPVSGVLAVGSADAVRTAVLVQALGDAGVGGRLWVLTRGAVAISRSDGGPDPVQAAAWGVGRVAALEYPDRWGGLVDLPEAVDRRVLDRLAGVLGQDAEDQVAVRASGVFGRRL
BGC0001856	scaP5	M12	AKR	M	Streptomyces caniferus	Actinomycetes	WLAVMAPGEVWSEAVVAGLAGCGVTVARVECVAGEVDRGSLAERVREVAGEEPVAGVLVVGAADTVSTAVLVQALGDAGVGGRVWVVTRRAAAVDGSDGGPDPVQAAVWGLGRVAALEFPDRWGGLVDLPEAVDRGVLDRLVGVLASGGEDQVAVRASGVFGRRL
BGC0001856	scaP5	M14	B2KR	MM	Streptomyces caniferus	Actinomycetes	WLLVAPAPAPEEAAGRVAAVQDALTAHGARVRLVGLTPEGGGSRERTAARLREELGDDDLTGVLSLLPLDEQPHPDHPAVPLGLSATLSLVQALGDLGIGAPLWCGTRGAVAIGRSESVTHAHQALVWGMGRVAALEHSDRWGGLIDLPETLDKRAADRLCALLADPDGEDQIALRGSGAYGRRL
BGC0001856	scaP5	M15	ER	M	Streptomyces caniferus	Actinomycetes	WAVVGDMALAVALDGTGVRAEATDSLSELADEVPPVVLVSATRTADPSDAAAGAHTAAHDALALLQTWLADDRFAASRLVILTHGAVSTSDADHPDPAQAAVWGLVRAAAVENPGRFTLLDLDGTPASTAAVPGALASGEPEAAVRAGALHVPRL
BGC0001856	scaP6	M16	AKR	M	Streptomyces caniferus	Actinomycetes	WLAVVDPGEVWSEAVVAGLAGCGVTVARVECVAGEVDRGSLAERVREVASDEPVAGVLVVGCAEVARSAVVVQALGDAGVGGRVWWVTRGAVAVGRSDGGPDPAGAAVWGLGRVAALEFPDRWGGLVDLPETLDRRALDRLVGVVADGGEDQVAVRASGVFGRRL
BGC0001856	scaP6	M17	ER	M	Streptomyces caniferus	Actinomycetes	AAVDASEGAAGRLDLSAIGAAVYPDLASLPQDGVPSHVLLRLDAPGGEPAAAAHTATHRALTLLQAWLSEERFAAARLVVVTQGAVTVDERRPDPALAAVWGLVRSARSEHPDRFTLVDLDGASESLAALPAALAGDEPELAVRAGQVYVPRL
BGC0001856	scaP6	M18	BKR	M	Streptomyces caniferus	Actinomycetes	WLLAHPAGHGDRAWETALTAGLTAHGAAAVVPVEVDCARADRKSLADQLATLLGGSGPFDGVLSLLGTDEEPHRGQPATPGGLAATMALVQALDDLGTAAPLWCATTGAVAVREGEAVPSPVQAAVWGLGRVAALEQPQGWGGLVDLPAEPDARAVERLCAVLEAGSAEDQVAVRGSGVFVRRL
BGC0001856	scaP7	M19	B1KR	MM	Streptomyces caniferus	Actinomycetes	WLLLTPGDATPADGLTAALAAAGAHPLTVPVDAEGDRAALAATIGAALRDPDDPDAPLPPVAGIVSLLALDEDEHGAHPGLPRGFAATVALVQALDDLGVEAPLWFATRGAVTTDPQRGVTAPRQALVWGFGRVVALEQPERWGGLLDLPETLDPAAATAAVRALAGLGDEDQLAIRPHGTLARRL
BGC0001856	scaP1	M2	A1KR	MM	Streptomyces caniferus	Actinomycetes	WVIAVPADHLEDDLVRATSRCLGERAHLMPVSATADRVELTAQLAALHDAAEAPLHVVSLLALDDRDAGGHRGVPGGLLSTLALTQALADTEHKAHLWAVTQGAVSTDDPAGGPEPDRASDPIRHPGQAAIWGLTRVFGLDHDERWGGLIDLPETLDDDAVRRFRSLLGGGGDSRDEFAVRPTGVHARRM
BGC0001856	scaP7	M20	EDH	M	Streptomyces caniferus	Actinomycetes	WVVLGSPAGASASGATDAGITEALDGAGVHTESYADLDALAAAVDTGMTMPDTVLLVCATETGTAAAPDVRGLLATTLATCRQWLAEERFAGSRLVLVTRGAVAAVPGEDVSDLAGAALCGLVRSAQREHPGRLWLLDLDHSEASREALADAVAAAPAQAVLRDGELRLPQL
BGC0001856	scaP2	M3	A2KR	MM	Streptomyces caniferus	Actinomycetes	WLVVVPADHLGDDLVRATLQGMGDNGAETVLLVLEESTTDRQAVADQLRSSLATGAPGGVVSFLALDERPLTGHPEVSVGLVQSVALMQALLDADVEAPLWLLTTESAATGSDDEVRHPLQAAVWGLARVFALEHPKQWGGLLDLPAALDDRGAALLSGVLAAGGDEDQLALRGSALLTRRL
BGC0001856	scaP2	M4	B1KR	MM	Streptomyces caniferus	Actinomycetes	WLVVVPEGHQDCPVAEGVDRALRSGAADLRTLIVGGEDADRERFAERLRDEAEAAGGTFAGVLSLVALDERPWAATESLPGGLVLMTSLLQALGAAGIDAPLWCATRGAVSVHRAESVDRPTQAMAWGLGRIAAFEYPQRWGGLVDLPGEWDDRAGRRLVALLAQDAGEDQVALRASGVFTRRM
BGC0001856	scaP2	M5	EDH	M	Streptomyces caniferus	Actinomycetes	YAILGTDGIPEPPASHGARYADLAALAAAVDAGAELPGTVLVGCPPADGDPAEATRRAVHHALEVAQAWLNEERFAASRLVLCTRDAVADRSGAPVPGLPQSAVWGLIRTAKAENPGRFALLDHDGTAPSAAALPAALATGEPEIALRAGTARVPRL
BGC0001856	scaP3	M6	0DH-BKR	M	Streptomyces caniferus	Actinomycetes	VVVLGAEGAGTGTETDESAASALHGALDALATAVEQGAEVPDLVVVPWWTAETAETSESGEPAAAAHASVVDALALVQDWLTRPGLADARLVLLTRGAVATGPDETVTDLPAAAVWGLVRSAQSENPDRFVLVDTDADVDMTEAVVEAAMAAGETQLAVRGARLLAPRL
BGC0001856	scaP3	M7	ER	M	Streptomyces caniferus	Actinomycetes	LLVLDSDDLAADLDAAGLPVTRLTGPDLQQATGTVLVTLPATDPHEAATGALALVQRWLADPPAAIRLVFVTRGAVDAPGTAHHAAAAAPLWGLVRTAQSEHPGRFVLADLDGQAASYAALPGALATEEPQFAVRGGTVHLPKV
BGC0001856	scaP4	M8	BKR	M	Streptomyces caniferus	Actinomycetes	WLLVVPATDPERYRSVADALTTALAAHGTTVTTLSLPPDADADHIAQRLDETRDPDHGPDERNVLSLLGLGTARHPQHPDTPAALVLTGALVQALLRTDAPVRLWTATRGAVSIGRSDPLGAPEQATVWGLGRSAAIEHPDHWTGLVDLPEQLDERALDRLCAVLHGPAHDTGHDTSHDNEFALRASGLFARRL
BGC0001856	scaP4	M9	ER	M	Streptomyces caniferus	Actinomycetes	LVGGSSAGRAGLVDFHDLDSLPDDSLPGFVALRLDARTDESTPTPAAARDAAHRALACIQEWTAAERYSATRLVVVTRNAVPAQLRRPDPAQATVWGLVRAARIEHPDRFVLVDVDGTEASQAALPAALASGEPELALRNGTAYLPRL
BGC0001902	benA	M1	EDH	M	Myxococcus virescens	Myxococcota	WLLITDRQGLGDALADSLRRQGVSRVHVVPSGSPSRFEDLFEQLEEGASWRCIFLAGLDTPALAPGAVPSGEGALPTQYAEALAFIQSALRARKQLRLCLVTRATQDVGRTATPAPEQAPLWGLGRVVAQEAPQCWGGLIDLPEDFDASEAAVSGLAETLEALCEGTRDDLRALRADQWYVPRL
BGC0001902	benB	M2	B2KR	MA22	Myxococcus virescens	Myxococcota	VLVFLPVSRFGQSVVQELRRRGMQPITVEAGDGFARLGDSAFGLSPTEEDHYEQLLEALGGPPGQVLHIASTGRTGSRQERAEATWRHGFQPLVLLARALGRRARSTVRLVVATDSQYAVSGTERLLPESALLAGPCRVIPLEYFNLRCHQVDVSLGGLEASQWAQHAACLVDELSGDTDEPVVAYRGGQRFVQHF
BGC0001902	benC	M3	B1KR-OMT	MA22	Myxococcus virescens	Myxococcota	WLVLADTQGLGSELTEVLLGLGQLVYEVRAGPRNEAISPYTFQLDPSSTDGFKALSEWLEQPVDHLFHLWPFDLGEGVTHERRLRLGLESVFGLVQALGQKWPTAPTALRVVAPHAFDVTGGVAPIPEAAALAGPCKVISLEYPTWTSQLVDLEPSTDRGQLAQAARWLVREALGASGDDVVAYRSGVRWLRAY
BGC0001931	IA W14	M1	BKR	M	unidentified unclassified sequences.	unclassified	MLLLASDDDTTDSGLATAIARELAVRGTEVHTAVVPVGTGREAAADLLRAAGDGAARSTHVLWLAPAEPDTADAVALIQALGEAGPDAPLWITTRDAVAAQPGEAPSVAGAQLWGLGQVAALELAQRWGGLADLPGEPSPAALRAFVGTLLAEGEDNQFAVRPSGVHVRRV
BGC0001931	IA W14	M2	EDH	M	unidentified unclassified sequences.	unclassified	WTVLGPAAGETAAEQAATEECATLRALPGAEPAAHADLAALRTALTAGTPVPGLVVVPATDIRPAESSAGAGAGVDAGADARVRRGKAHVRTATAHARTGTDWGDDPVRVALGRGLALVREWTEDERLADSRLVVLTRGAVEAGSGEVPDLAGAALWGLLRSAQSEYPDRFTLVDVDDSPESRAALPRALESGEPQLALRAGALLAPAL
BGC0001931	IA W13	M3	EDH	M	unidentified unclassified sequences.	unclassified	WAVVGPEAEATAAGLRAVGIDARTHVLPFDEPLPPQVGADAEVILLDLTTATATATATASRTAPHGRLLGLLDELRATVRRTLEAVQARLADTDTDTDTNADAGADSGVRTDARTATRPGGRPRLVVLTRGAAGPEGGAADPAGAAVWGLVRVAQAEQPGRFTLVDVDGAQASLRALPGLLATDTAQLAVRDGRAAVPRL
BGC0001931	IA W12	M4	C2KR	MM	unidentified unclassified sequences.	unclassified	RLLIVPTGEQHAALADTVEQAIASFGGTVRRIAVDPARTGRAELLGLLESAINGDTAVTGAVSLLGLCTDGRPDHPAVPTAVTATLALVQALADLGSTAPLWTVTCGAVATAPDELPCTAGAQLWGLGRVAALELPEVWGGLIDLPAQPDARVLDRLAGVLAEPGGEDQIAIRMAGVFGRRV
BGC0001931	IA W12	M5	ER	MA3	unidentified unclassified sequences.	unclassified	WVVAGPDVLGLAEAADAHLPDALGPDGPLPTAAGEAAPDAFVFGVPTGTGDVAADAHAVACQVLDLVQRRLAAPDAPEGARLVVATRGAVAVRGDAEVSDPAAAAAWGLLRSAQAEEPDRFLLVDLDDDPASARALPTALASGEPQTAVRAGRVYVPRL
BGC0001931	IA W11	M6	A1KR	MA21	unidentified unclassified sequences.	unclassified	WLLVELPGAAPDEADAAATALGTAGAVVERCPLDPAEVARVALTERLAELAAGPQGLAGVLVLPGRAADAAPADAFPLDPGTAAVLLVTQAVTDGAPKARVWVATRGAVAVGPGEVPCAMGARVWGLGRVAALEAPVQWGGLVDLPAEPGGRDWRRLAAVVSGRGGEDQVAIRGSGLFGRRM
BGC0001932	cle1	M1	BKR	M	Kitasatospora mediocidica	Actinomycetes	WLVVAPEGETLWADGVARVLSERGAEAEVIGLGADGDRASVAERLRAEVGDGAVAGVFSLLAVAGGESGLLGNTVLVQALGDAGVDAPLWLATRGAVSVGRSDGLVDPAQALTWGLGRVVALELPERWGGLVDLPESVDERALTRLVSVLAGAGAEDQVTVRDSGVFGRRL
BGC0001932	cle3	M10	EDH	M	Kitasatospora mediocidica	Actinomycetes	WAVLGSAALVGADVPAYATYTDLVEAVETGAPAPEFVFVSPSADGAGEDAAAVAHRAGAEALALVQAWVAEERFADSRLVVLTSGAVATEAGAPVADLAGATVRGLLRSAQSENPDRFLLVDIDGHADSLGALSAALTVGEPEIAIREGALKAPRL
BGC0001932	cle3	M11	BKR	M	Kitasatospora mediocidica	Actinomycetes	WLVVTAADQADEAWAEGVVRMLTARGAEARVVELGAEGDRASVAERLRAEAGDGAVAGVFSLLAAAGAAGLNRTLALTQALGDAAVDAPLWVATRGAVSVGRSDAPVDPVQARVWGLGRVAALELPERWGGLVDLPETADDRALARLAGVLSGRGGEDQVAVRSSGVFGRRL
BGC0001932	cle3	M12	0DH-BKR	M	Kitasatospora mediocidica	Actinomycetes	FAVIGGDELKLGAALESAGARVEAYDDLAALNAAVAAGGSAPETVLLPLLHEPGDAAGEDLAGAVHAAAHHALNLLQEWLNGGRPGAARLVVVTRGAVAAAGDTEVADLVTAPVWGLLRAAQAENPEQFLLLDIDGLGSPWTESGAASFAAVPGALATGEPEIALRAGTAYAPRL
BGC0001932	cle4	M13	C2KR	MM	Kitasatospora mediocidica	Actinomycetes	WLLVAPGTEDERAAAVAAALGERGADVRRLTVDATATDREALAALVRAELTGDDAAYDGVLSLLALDERPYPGHSALPAGVAAQLALVQALGDAGIAAPLWCATRGAVSTGRSDRLESPEQALIWGLGRVAALEHLERWGGLVDLPETLDERALGRLAGVLAGDGDEGQVAIRATGVLGPRL
BGC0001932	cle5	M14	BKR	M	Kitasatospora mediocidica	Actinomycetes	WLVVTPAGAADSPWPAESVRMLTERGVRVAQLAVDATAADRTDLAERLRAALPEGTAPTGVLSLLGLDERPHADHPELGANLAGTVALVQALGDAELDAPLWAVTRGAVSTGRSDRLTGAAQAQLWGLGRTVGHEHPERWGGLIDLPETADERALGRFAEALSGLGDEDHLAIRPQGIFVRRL
BGC0001932	cle5	M15	EDH	M	Kitasatospora mediocidica	Actinomycetes	WAALGAVGLDGADVPSYADLAALAAAVDAGVPAPEFVLVSPGAAGGTDAAAAAHHAAAEALGLAQEWLADQRFADSRLVVLTSGAVAAVPGEPVPDVARAAVWGLLRSAQSENPDRLLLVDLDGQDQSRRTLPGALAAGESQLALRAGVAYTPRL
BGC0001932	cle5	M16	EDH	M	Kitasatospora mediocidica	Actinomycetes	WVALGGEPFAAAGRTLDGYADLAALAADGTAPDVVFVPLAAAGTGPQLPDTARAAARAALELVQGWVADPRFDDARLVFVTRGAVAARDGEELTDPAHAAVWGLVRAAQSENPGRLVLVDADGTDASHRALPAALATDEPQLALRSGAAHSFRL
BGC0001932	cle6	M17	EDH	M	Kitasatospora mediocidica	Actinomycetes	WALLGPDALNLAATAGERLDAHADLAALTEAIAAGTPAPDEVLVTFAPGTETDPVAVHAAARRALALVQAYLADEHLADSRLVVLTSGAVAADADGSASDLTNSAVWGLVRSAESENPGRFVLIDLDGEDVTRALPAAIASGEPQLAVREGTLRAPRL
BGC0001932	cle6	M18	EDH	M	Kitasatospora mediocidica	Actinomycetes	WAALGSVELLRRVVGDQVAAYVDLAGLTASVEPDEAPEFVFVAPPAAVGEGVAAATHTATAEALALVQEWLADERFADSRLVVLTSGAVATGPGEPVTDLSGAAVWGLVRSAESENPGRFVLVDIDDHDDSVRVLPTALTSGESQLALRKGAVRMPRL
BGC0001932	cle6	M19	EDH	M	Kitasatospora mediocidica	Actinomycetes	WAVLGTDVYGVTTAYPAIPVHPALTALTETGAAAPREVLFACTADADSGPAAVHRAAAEALALVQEWLADERFADSRLVLLTRGAVATGTDEPVTDLPGAAVWGLVRSAQSENPGRFVLVDLDGTNDSLRALPAALASDEPQLALRDGTPRAPRL
BGC0001932	cle1	M2	BKR	M	Kitasatospora mediocidica	Actinomycetes	WLVVAPEGEGLWADVVARVFSECGAQARVVGLGVDAGRVSVAERLRVEVGDGPVAGVFSLLAVAGGESGLLGNAVLVQALGDAGVDARLWLATRGAVSVGRSDGLVDPAQALTWGLGRVVALEVPERWGGLVDLPESVDERALTRLVGLLSGRAEDEAAVRGSGVFGRRL
BGC0001932	cle6	M20	EDH	M	Kitasatospora mediocidica	Actinomycetes	YAILGGGELKAAAALEAAGVRAEAYENTAALAAAVDADGTAPDVVLLPCLPDLGTAGDAAAAAHAVTGRVLALVREWIADERFADSRLVLLTRGAVAVRDAVADDGTEAEPVEDLAHSAAWGLVRSAQAEHPGRFVLVDVEADSDAANGLLKELPALLATDEPQLALRADGWHAPRL
BGC0001932	cle7	M21	B2KR	MM	Kitasatospora mediocidica	Actinomycetes	WLLVVPESAADDWAAGATRLLTERGADVRQLVMDTGTDGRESLTALLRQATAEAEAPFTGVLSLLALADRPHPVHTSVPAGAAAQLALVQALGDAEITAPLWCATRGAVSVGGADLLESPAQALVWGLGRVAALEHGERYGGLVDLPETADDRALARLVTVLAGAEDEDQVAIRPTGLFVRRL
BGC0001932	cle7	M22	B1KR	MM	Kitasatospora mediocidica	Actinomycetes	WLLVVPESAIADDWALSALAALAERGADVRQLTLGAGELDRESVTRRVREELDGAAPVAGVLSLLAFDAQPAPGTDGVDAGLTGSAALIQALGDIGIDAPLWCATRGAVSVGRSDRPDNPAQALAWGLGRTAALEYPERWGGLIDLPETADERALARLMTVLAGAEDEDQLAIRAAGVFARRL
BGC0001932	cle8	M23	EDH	M	Kitasatospora mediocidica	Actinomycetes	WALLADAPAPELTTALPTAAAYHGLEALAEAVAAGAPVPQAVVVPVFGPAGPDAERLTADVRTALHRTLELAQAWLADDRFADSRLVIATRGAVATAADADVDDLVYAPLWGLLRSAQSENPDRFVLLDVDGRDESYRALPTALASDEPQLAVRAGTVLVPRL
BGC0001932	cle8	M24	ER	M	Kitasatospora mediocidica	Actinomycetes	WAVLGADAPAGLTSGSAVHADLAALGAAVEAGAEAPAYVLAYRAPRQSGDDPTAAAHTAVRDALALVQEWLEDERFAASKLVLVTQGAVATQGDTGVHDLAHAPVWGLVRSAQSENPDRLVLADLDGDTASYGTLAAALASGEPQFALRHGTVHAPRL
BGC0001932	cle8	M25	EDH	M	Kitasatospora mediocidica	Actinomycetes	WAAVGSDALGLTAHPDLAALAAAIEAGDEAPEYVFYVPGARPFAQGTDTPAMAHQVSADVLDVVQGWLADERFAAARLVVLTSRSVIAADGDSMMHVSSAAALGLARTAQQENPDRIVLVDIDGRGDLHTVVAAALAAGEPQVAVRDGAVLAPRL
BGC0001932	cle9	M26	EDH	M	Kitasatospora mediocidica	Actinomycetes	WALLGTDVLGLESVAGTTAYENLAALATAPESGEAPEFVLVPSVATGVEDVAGAAHRATAVFLALLQEWLGDERFTDSRLVVLTSGAVAVAPGEPVSDLVGAAVRGLARSAQSENPGRLVLVDVDGHPDSLRALPAALHCDEQEIAVREGALKAPRL
BGC0001932	cle9	M27	EDH	MM	Kitasatospora mediocidica	Actinomycetes	WALVGADALGLGAALSAAGIGCESYADLVELAAVVASGKPAPELVLLPYGSGTTGDVAEDARRATHAALADIQSWLAEEAFAGARLAFVTRGSVATEPDADVPGLAHAPVWGLVRSAQTENPDRFLLLDVDGDEASVRALPAAVASAEPQLAVRTGGFLAPRL
BGC0001932	cle1	M3	EDH	M	Kitasatospora mediocidica	Actinomycetes	WAVLGADAAELAGLQTAFGAGIRLGAYDDLAVLRTALDAGAPVPHTVLVSGGEAAGTDAATAVHATTLRTLDLVRSWLADERFAESRLVLLTREAVETEAGAGIADLPIAAARGLFRSAQSENPGRLTLLDVDGRPDSLRKVLAALAVDEPELALRDGAALAPRL
BGC0001932	cle1	M4	BKR	M	Kitasatospora mediocidica	Actinomycetes	WLVVAPEGEGLWADAVARVFSECGAEARVIGLGVDGDRVSVAERLRVEVGDGAVAGVFSLLAVAGGESGLLGNTVLVQALGDASVDARLWLGTRGAVSVGRSDGLVDPAQALTWGLGRVVALEVPERWGGLVDLPESVDERALTRLVGLLSGRAEDEAAVRGSGVFGRRL
BGC0001932	cle1	M5	AKR	M	Kitasatospora mediocidica	Actinomycetes	WLVAVPAGHAGNRTVRSVQDALAERGAHVRTVELATAGSDPVELAAALRAASAGEPVHGVLSLLALAERPHPEHPAAPTGLLLTSALVRALGETGWDAPLWCATTGAVSTAPSERVGSAVQAQIWGLGRVVALEHPERWGGLLDLPAVLDERTADRLAAALGGTVGEHGHEDQLALRTAGILARRI
BGC0001932	cle2	M6	EDH	M	Kitasatospora mediocidica	Actinomycetes	WAALGSAAQAGTDIPAYADLAALAEAVGSGADVPEFVFAPLDAQEHRDAAAAAHRAAAEALTLIQAWLADERFADSRLVLTASPHDLAQAAVRGLVRSAQAENPDRFVLLDIDDWQARAALSAALASGEEQLAVRSGVVSTPRL
BGC0001932	cle2	M7	AKR	M	Kitasatospora mediocidica	Actinomycetes	WLVVAPASLADDARIGAVTEDLARRAARIVRVELDATDTGPEALAARLASATAAEGPLAGVFSLLALDERAHPDHPAVPVGLALTNALAEALAGRAEYASARLWCATHGAVSVDGSDRLDSPAQAQVWGLGRAVALEQPERWGGLVDLPETLDERALSRLAGVLAGAHGDEDQLAIRAGGLFVRRL
BGC0001932	cle3	M8	0DH-BKR	M	Kitasatospora mediocidica	Actinomycetes	RAVLGTDAFGLGPAGVTGAAFPDLAALAAAVDAGETPAPELVLASFPAAQDGEGLAAATHRAALRALELVQGWLADARFTDAKLALVTRGAIAAGPDEDVTDLAHSALWGLLRSAETENPDRFVLVDLDGTDASTAALHGALATGEPELALRDGEILVPRL
BGC0001932	cle3	M9	BKR	M	Kitasatospora mediocidica	Actinomycetes	WLVAAPEGEAGWSAGIIRTLTGRGAEARLVELGAADGRAGYAERLREAAAGTEVSGVLSLLALTEDGGLPATAALTQALGDAAVDAPLWVATRGAVSAGRTGAPADPARAQVWGLGRIAALEHPERWGGLVDLPETADDRALTRLVTVLAGAGDEDQIAIRSAGVLGRRL
BGC0001941	ftaB	M4	EDH	M	Myxococcus fulvus	Myxococcota	WLVFSDAGGVGDALAGALEARGAWCARVRPGAAYASHDGRTFTLDPARAEDFARLFTDIADAGEPACRGIVFLWGLDAAAPLTERSVCQGALHLSQYLGSRGTAVPPRLWMVTRGVQRTKHESFVPAVSHAELWGLGRTLALEHPERWGALIDLDGVAREDESTLLLSELHQRPEGEEVALREGRRYVARL
BGC0001941	ftaC	M5	OMT-A1KR	MM	Myxococcus fulvus	Myxococcota	WLVLCDRTGFGEALAERLRARGERCLLLHAELDPGAGGGSRSVRPEDSADWQRVLEALVAESGGPFRGVVHLWNLDLASASSPEASAVREVVTLGCGSVLSGLRRLGGGLGANTRVWLVTRGAQAVAEKDSVSFAQSPIWGAGRVLALEHPELWGGLIDLSPVASGAEVDALCDELCASDGEDQVALREGRRHVARL
BGC0001944	FunP7	M22	ER	M	Streptosporangium sp.	Actinomycetes	WAALGAVRDTGLPLADLDSLTGSPAVLLLDCPPETTGLDDGPIGLAARVHAATQRVLAALQRWIGDERLAETTLVVTTTGAVSGGPGEEPTDLAHAAVWGLVRSAQSEYPARIVLADVDGGAASWAALPALVAAGDVPQALIRAGVVAAPLL
BGC0001944	FunP7	M23	EDH	M	Streptosporangium sp.	Actinomycetes	TIPLGAALPAPTPVLTVDATAPGAAGERAAALLTLLQTWLADPAWADSRLVVRTFGAVGDEITDPDGAALWGLVRSAQAEHPDRIHLLDAPGETVLPLPEALVRDGVARVPRL
BGC0001944	FunP7	M24	EDH	M	Streptosporangium sp.	Actinomycetes	VIALGDPLPAPAPVVSVNATAPGAALDRAATLLTLLQTWLADPAWAGSRLVVRTHGAVGEEVTDPDGAALWGLVRSAQSEHPERIHLLDGPEDVFYPVPEALVRDGVVRVPRL
BGC0001944	FunP7	M25	EDH	M	Streptosporangium sp.	Actinomycetes	VIALGDPLPAVPASVMVVDATAPGAARDRAAALLRFLQTWLAEPVWADSRLVVRTRGAVGEKVTDPDGAALWGLVRSAQSEHPERIHLLDGPEDVFYPVPEALVRDGAVNVPRL
BGC0001944	FunP8	M26	EDH	M	Streptosporangium sp.	Actinomycetes	VIPLGAPLPAPAAVLLVDATAPGAARDRAAALLTLLQAWLADPAWSDSRLVIRTFGAAGEEITDPDGAALWGLARSAQAEYPGRVHLLDAPEDTVLPLPQALVRDGVVTVPRL
BGC0001944	FunP1	M9	EDH	M	Streptosporangium sp.	Actinomycetes	WAVLGEPLPELPGVPAQATLGAPVTLLAAWGAATDEIAEATHVEEDAEGTHAEEVAEATHAEVRRVLEILQRSLATDSRLVVLTRNAVLPEGGGADLAGAAVWGLLRSAQQENPDRFLLVDVDDDAASWRALPAALASGEPQLAIRGGALFAPRL
BGC0001963	catA	M1	A2KR	MM	Catenulispora sp.	Actinomycetes	WLVVVPAGSEHEDSAAAIIAALERHGAEVRPVPVDPTSADRAAIGDLLREQLSQSGGTGTVSAVSGVLSLLALDERPHPEHPVIPSGVAANLLLVQGTGDAGIDAPLWCVTSGAAAVEPAEAPAHPAQAQIWGLGRVAALEYPQRWGGLVDLPSLPEAMSDTGALTEAVTDHLCIALTGPDHEDQIAIRATGIHTRRM
BGC0001963	catD	M10	BKR	M	Catenulispora sp.	Actinomycetes	WVVLCAAGVGGSQRCVDVVGGLEAAGAASMVVEVAEWDRAWLAGRLSELDSVSGVLLLTDDEPSAWVGRVLAAVQGLVDAGVGGRLWAVTSGVMTTDTDVWLAGVWGLGRVAGLEVPALWGGVVDLPADVWGSDVVSGLVGVLSGSESEAVVAADGSVLVRRL
BGC0001963	catD	M11	A1KR	MM	Catenulispora sp.	Actinomycetes	FLLVVDSTHSADAEAIGAGLASHGAEVRTVAIETATADRAGIAAQIARAADGVPLTGVLSLLALDERPRPDHPAVTAGLAATLLLIQALGDASLDAPLWCATQGAVSIGASDPIRAAGQAAVWGLGRVAGLEQPRRWGGLIDLPERIDDAVIGRLAAVLGSGAQPRLATRGSGAAALGGAADHQLAIRGSGLAAPASAVQSRPAASTLVSAAPATTTEDQLAIRSSGLFARRL
BGC0001963	catD	M13	AKR	M	Catenulispora sp.	Actinomycetes	WLVPLPEGTADAPGAELLLAALGRHGAHVVRVAAVGTDREANAESLRALMAEHEDIAGVLAPVAWTSGPEDCADGLPAGLATLFALTQAMGDAALDAPMWVLTSGAVSIGGSDPQRSAVQAGVWGFGRAAALEYSAHWGGMLDLPEALDERAARRVVSVLTGGLGDEDQLAVRSSGVYVRRL
BGC0001963	catDE	M14	ER	M	Catenulispora sp.	Actinomycetes	WAIVGGDTLGFGDGCAAAELPVTTYTDLAAVAEAGAAAVPETIFVICDGRQADDVATKTHDLVTEILSILQAWLADPAFDTSRLVVLTNGAVGDDVRDPAAAAVWGLVRSAISENPGRIALADLDGAADSVRVLAALLSGADTSGLVGAEVLIRGGAVAVPRL
BGC0001963	catE	M15	ER	M	Catenulispora sp.	Actinomycetes	WAVVGSDGLGFGSRFDAVGVHVEAYADLDGLAASAAGGAVLPDLVFAVCDGRGRQPADDVAAAAHSLVGEVLEVLQSWLADPAFDRSRLVVATSGAVGDDVRDPAAAAVWGLVRSAISENPGRIALVDLDGADESVRALRTLVTEGAADGVPVSEVLVRAGTVRTPRL
BGC0001963	catA	M2	A1KR	MM	Catenulispora sp.	Actinomycetes	WLVTVPAGPEYEASAATIIAALERQGADVVTLPLDTMHAERSAYRDLIREHTRGRGELAGVLSLLALDERAHTEHPSLVSGFAATIALSQALEDVGLIAPLWCVTSGAVSVDGVEPVLHPLQAQAWGLGIVAGLEYPQRWGGLVDLPGGLADGLSDTVTGHLCTALTGPDHEDQIAIRATGIHTRRL
BGC0001963	catB	M3	AKR	M	Catenulispora sp.	Actinomycetes	WLVVARSADTVPAALLEAFATAGAETSIVTPDKIGTGLADVTGVLSLMSWDADGEIAAVADTLAVLNAAIPAPLWCLTRNAVAARDGDVPDPAQAAVWGLGRVAGLEHPDRWGGLIDIAGDATDAAADPWSDVCRHLANPGPEDQIAIRDGATSLRRI
BGC0001963	catB	M4	B1KR	MM	Catenulispora sp.	Actinomycetes	WLAVLPDEAESWTRELLDALTAQGMQLDLIPVADLDRASVAAALTPALGTQTPVAGVLSLLSAGPASMSATIAVLQALGDLGSSAPLWCVTRGAIAVDTVDRVADPEQAQTWGLGRIAALEYPQRWGGLIDLAAADDGVTGVAAAPSVTSAVRRTATALAAALANRAGEDQIALRPSGAYVRRL
BGC0001963	catB	M5	EDH	M	Catenulispora sp.	Actinomycetes	WAVLGPSPVRLVKALGTAGAAVESYPDLQALRDAVTAGGGVPDRVVVAGVPASETAEPLQEHPAGDMPARVRAVTNAALDLVQTWLGDDRFAASRLVFVTESDTGAGTVDDLVWAPVWGLVRSAMSENPDRFVLVDIDDRDASYAALAAAITCGEPNVAVKIGAVHVPRL
BGC0001963	catC	M6	EDH	M	Catenulispora sp.	Actinomycetes	VGGAGSGHSDPVVVEVAGFDDGDLDVAVAARRVLDRALEAIRGAATGSGRVVFVVPDPSVGRGVVCAGVAGLVRSAVVEYPGRFGLVEVFGESDESLLSAALGVDEPDVVIRDGAVFVPRL
BGC0001963	catC	M7	EDH	M	Catenulispora sp.	Actinomycetes	AGTVSIAVVSDAVVDVAEFDDGDPDMAVAARRVLDRVLGVIRESAGDAAAGAASASGPGSDSGSGSGRVVFVVPDAAVGRGVVSAGVTGLVRSAAIEFPERFGLVEVLGGGFGDLDESVRSAALAVDEPGVVVRDGAVFVPRL
BGC0001963	catC	M8	BKR	M	Catenulispora sp.	Actinomycetes	WLLLHTPTPATSQRYTAMLEGLASAGATPLPIEVQEWNRTWLANRLAELGPVSGVLLLTDDEPSVWVGRVLVAVQGLVDAGVGGRLWVVTSGVMSADADVWLAGVWGLGRVAGLEVPALWGGVVDLPADVWGPDVVSGLVGVLSGSESEAVVAADGSVSVRRL
BGC0001963	catC	M9	BKR	M	Catenulispora sp.	Actinomycetes	WAVVCAAGAGESQRCADLVDGLQLSGAGSVTVVEVGTGEWDRAWLASRLGGFGPMSSVVLLTDDEPSAWVGRVLASVQGLVDAGVGGRLWCVTSGVTTADADAWLAGVWGLGRVAGLEVPALWGGNVDMPTGAWSPDAVSGLVGVLSSSESEAVVAADGSVAVRRL
BGC0001970	mgcG	M1	OMT-AKR	M	Okeania hirsuta	Cyanobacteriota	WIIFSDKDGVGERLKNILEERGDRCLMVFRGETYQQKETGSWELNPSSPADFASFCQDAKVNVGENLKIIHLWSLETTASQQLTQSALESAQKYSCGSVLHLMQAIEKHWDLNSPSSQLWLITKGSQSVLPVEEVAIAQTPLWGIGKVISLEHPELWGGLLDLDQASSTNENEAETLLQLLEEEQEEDQLAIRNGEIYVARL
BGC0001970	mgcI	M3	ER	M	Okeania hirsuta	Cyanobacteriota	WLIFALTDELVESIGQDLQQRGQNYIRVSPGSEYQQLNAQHYQINPTVAEEFSKLIQDNSDIQGILHLWSLNQTEDLQTAQELGCATTLHLLQALVQAGLSNAIPMWLVTQGTQNIFDAAEVVQPQQGSLWGLGRVISLEHPELKCGRIDLDSTSNFAETIPILVDELFYQDNEDQIAIRQGVRYVARL
BGC0001970	mgcQ	M5	0MT-0DH-CKR	M	Okeania hirsuta	Cyanobacteriota	WLILADKQGVAQQLASHLRSSGDACTLVFAGENYQQLAPEEFTIAPHHPEEFEKLIETVATKSPSLLGVVQCWTTEAGVGRNISAEELGHLSKLGCGTTLSLVQALVKAKLSESPRLWLVTNGSQAVPSNNSVIPGVAQSSLWGMGKVISLEHPELKCACIDLDSQETIETQAEELFEEIWAEDKEDRVAWRGDERYVARL
BGC0001970	mgcR	M6	ER	M	Okeania hirsuta	Cyanobacteriota	WLILAEDTQLIEALQNKEQECIQVSPGETYKQLSPQHYQINPNNEEEFQQLLAENSGITGVVHFWGVQKSENKENLELDKIQENICASALHLVHAILESNSETTPQLWLVTQGTQSVNKDSEVINPEYGSLWGFGGIVAIEHIDLKCKRFDCDPEANIEQNLDSLVAELLSENIEDQIAIRQGNRYVARL
BGC0002011	AscA	M1	ER	MM	Amycolatopsis alba DSM 44262	Actinomycetes	FVTLDLTEDPGDARAITARVLAALHSGEAPLVVLTRGGVDAEPAQAAAWGLVRSAQAESPGRYFLVDVDDDPASSAMVPSVVASGEPQALVRAGAVSVHRL
BGC0002011	AscA	M2	EDH	M	Amycolatopsis alba DSM 44262	Actinomycetes	DFIVCEAGDGDARTVVARVLAALQEFGRAGGTDRLVVVTRGLVGPGSGDPVGNAVWGLVRSAQSEEPGRIFLADVDDPACRPPIGDEPQVAVRDGVVFVPRL
BGC0002011	AscB	M3	EDH	MA21	Amycolatopsis alba DSM 44262	Actinomycetes	PVEPGLSADTDFAVCEVGDGDVRDVVAGVLARLQEQGPSRLVVVTHGVSTPVGAAVWGLVRSAQAEEPGRIVLADLDEDPASRALLPQIAAGDEPQVTIRAGQVTVPRL
BGC0002011	AscC	M5	A1KR	MM	Amycolatopsis alba DSM 44262	Actinomycetes	WLLVTRGGQDDPAVAAVADGMTAAGVRIERLTVGELDRLREIGAVDGVLCLLALDEAADLLTLVQALRDVKAPLWTVTRGGVQVDEHDGVPDPRQAAVWGLGRVVGLEHPGRWGGLIDLPEVVDTEAVKRLLAALNGTEDQLAVRATGVCARRL
BGC0002011	AscD	M6	EDH	MM	Amycolatopsis alba DSM 44262	Actinomycetes	GLVRSAQAEEPGRIVLADLDDDPASRALLPQIAAGDEPQVTIRAGQVTVPRL
BGC0002011	AscD	M7	0DH-BKR	M	Amycolatopsis alba DSM 44262	Actinomycetes	PDALVVTRGQIGPDRGDPAGHAVWGLVRAAQAEEPGRIVLADLDPDASPGLVPRNEPEVVIRGGAVFVPKL
BGC0002024	ngnA	M1	B2KR	MM	Nocardia argentinensis	Actinomycetes	WLVIAPPAAHEPAWAPAVRAALRAGGAQVVELRPGTTDRTALREHIPHQVDGVLSLLALDEAPTPGSAAVPTGTAATLTLVHALADAGVEAPLWILTSGAVAVHRTDDLRHPTQSQVWGLGRVVALEQPERWGGLVDVTAAPDDRAIERLLAVLTQRTEDQVAIRESGVFARRL
BGC0002024	ngnA	M2	EDH	MM	Nocardia argentinensis	Actinomycetes	SVVPADIVSHVEVSNAAELTALAAAFDEDDAELPSLVFARLDLRPDEHTEPSAATARDEALRVSELLRHWLAEPLFDDSQLVLVTRHAVRVLPDDPAATRFATVWGMVASAQTEHPGRFVLADLDDADTSYQRLPLAVAGGEPQIAVRDGRPRFPRL
BGC0002024	ngnA	M3	EDH	M	Nocardia argentinensis	Actinomycetes	GDTVLEVVVPPADRDDLAESARRTAEQVLHSVQDWLERQSSTTSRLIVVTTGVRSGDPHRRLPAAAVWGLVRSAQVEHPGRLVLVDTDGDTARLAAAAASGAGQIALRGHQAYAPRL
BGC0002024	ngnB	M4	A1KR	MM	Nocardia argentinensis	Actinomycetes	VLAFVPAEHTAHPAIAAALAALPDVVRVPVDGTLAHDSITALLTEHQPRHVLSFLAFDAEPAAATLGLLHACADADLAGVLWCVTSGAVAVGRADRLRDPDQAAVWGLGQVAGLEFPRWWGGLVDLPPEVDDRAAARFATILAGGWAEDQLAVRASGVFARRL
BGC0002024	ngnB	M5	BKR	M	Nocardia argentinensis	Actinomycetes	WGVVVPESAHDDADVLAVIAALRAAGAQVLVGQAGDLGDGSGLAAVVSLLAFDEEPDHRHLMLSRGLTATVALAQALQRNGFGAPLWCLTRGAAAIGRAERLHSPAQAQFWGMGRAVALEWPQGWGGLIDLPPTLDDRTLTRLPALLADPAGEDQLAVRASGVFAARL
BGC0002024	ngnB	M6	EDH	M	Nocardia argentinensis	Actinomycetes	VFTDIDDENGPADATHVLLRTNHGHDPHPDVALTAVTEVLHTIQSFADDRTLVVVTSNAVAVDGEPSPAGAAVWGLARTAQVEQPGRLLLVDIDDDERSLAALPHALTCDEPQMVLRGGRIHVPRL
BGC0002024	ngnC	M7	EDH	M	Nocardia argentinensis	Actinomycetes	EVVFLPVRPATNDAEDAAAQVLSLLQSWLTDDRASVAQLAVVTTGSQLLDDDEPADVPAALANAAVWGLTRSAQSEHPERFVLVDVDDPDSAWQERVTAAVAAGENQIAVRRGATYAPRL
BGC0002024	ngnC	M8	EDH	M	Nocardia argentinensis	Actinomycetes	WSAVLGDEQWLLSMLRGSGGQVERYADLTELASAATASGAVPDAVYFAPAAPGGDLPSATTQLTTRVLTILQLWLANQRFAAGRLVLVTRDAATSPIMAALTGLVRATHAEHPGRVLTLDIASSGQTPNWRQFAAALASGEPEVAIRDGGVHVPRL
BGC0002025	thxC1	M2	ER	M	Jahnella sp. MSr9139	Myxococcota	WALLGVDAMGLAAALEEATVRVESYADLAALKVALDQGGRVPQVVAIAWMGHADDPARAAHEATHRGLALLQAWLADERLAPCRLVVLTCRAIATRPHEGDLDLVHAPLWGLVRSAQSEHPDRSIILVDLDDNEASRRALPQALASGEPQVAVREGALRVPRL
BGC0002025	thxC1	M3	ER	MM	Jahnella sp. MSr9139	Myxococcota	WALLGKGDVGWAEQLQSAAVRLDRHADLAALQAALGQGEPPPEVVVVPCIARAGDLAQAAHEATHRALALLQAWLTDERLASCKLVLVTRGAVAARLDEGVLDLVHAPLWGLVRSAQSEHPDRAIVLLDHDDQASLRVLPEAALSGEPQLAVRNGTLVVPRL
BGC0002026	thxA1	M1	ER	MM	Jahnella sp. MSr9139	Myxococcota	WLVLSDRGGVGAALHAALRARDQRCVRVVEGASYERIEPDLYRIDPLKAEDHRRLLREAFGEQERCAGAVHLGALDTRPVERWTPEAMEEELMRGSVSATYLAQALLRHGWRDVPRLWLVTRGAQAAGGGEAAIAVAQAPLWGLGRSIALEHPELRCTRVDLSPSPLDGEAEVLASELAPANREDQIALRSDGRHVARI
BGC0002032	A1	M1	BKR	M	Streptomyces sp. S816	Actinomycetes	WLYVVDEETAWTEAVRAGLTELGVTLVPFTATEDTDRDALARSLAEAECERADGVLFAAAPAPAGAASAPADAGTDALQRLVLLVQALGDAGIETPLWCLTSGAVSTGPADPLTDPAAARLWGLGRIVALEQPQLWGGLVDLPAEPDPRALACLAGLLDQSDEDQLAVRPSGVSVRRL
BGC0002032	A4	M10	AKR	M	Streptomyces sp. S816	Actinomycetes	WLFLTTQEPTGTNDATAAEDRPAATAWTSAVADGLAARGARLIRVTVDPAADRDALLRQLTDAVRDVPINGVISLLGTDESPHAAHPDLSVGTALTLALVQALGDAGIAAPLWALTRSAMSTGRADPVPSAAQHAVWGLGRVAALEHARRWGGLIDLPDTIDDRVVDRLAAVLTQSAEDQVAIRARGAFGRRL
BGC0002032	A4	M11	AKR	M	Streptomyces sp. S816	Actinomycetes	WLVPVSAAHLGDDWVTACLRGLTERGLTTLPVPVEPSTDRAELTAQLTGAVGDETVAGVLSLLAVDGEAAPTAAALTVGVALSVLLVQALGDAGIGAPLWCVTRSAVGVSAAETVADLHQSQVWGLGRVAALEHARRWGGLVDLPGTVDDRIAGRLVAVLGQSAEDQVAIRDRGVFARRL
BGC0002032	A5	M12	AKR	M	Streptomyces sp. S816	Actinomycetes	WLLAVPENENGNEDADERTGAVRAALAARGATLRTLVVGAASDRAALAGELAGAGPVDGVLSLLLTGDPVLPTLRLLQALGDAGLDAPLWCLTSGAVAVNGSDAVRNARHAQVWGLGRTAALELPRRWGGLIDLPETFDDRAAARLADVLGQALTGRSAEDQLAVRASGVFARRL
BGC0002032	A5	M13	A1KR	MA10	Streptomyces sp. S816	Actinomycetes	WLAVLPAGLADGQWPPCVVGVLGAHGAKVRVVEIPADSDRARTARLLAEELGGEQPAGVLSLLGLAPGAHPDHPALSASLAMTLTLIQALGDLDVQAPLWCATRGAVSTGATDPLHDVGQAQLWGLGIVAALELPRRWGGLVDLPDTVDKHTLRRLAGVLAQHDEDQLAVRADGVYGRRL
BGC0002032	A1	M2	EDH	M	Streptomyces sp. S816	Actinomycetes	GIRIEPYEDLAALRDADSPAVTATEAATEGATEAATEGAAEAEAEAPADAVIVPCPTGTATDLATRVREVTYAVLELLQWWLAEERPARLVLVTRTGDLAQAAVRGLVRSAQTENPDRVVLVEASTEAATGSGADHIGPAQFLPGLAHVLPGLLASGEPQALVRADGEIRVPRL
BGC0002032	A1	M3	EDH	M	Streptomyces sp. S816	Actinomycetes	SAIETFVDFAALREAEGTPETVVVPCPAGSGAETDRVHSVHSVTDDVLALVQWWLARERAGRLVLVTRPGDLAHAAVWGLVRSAQSENPDRFVLAEAEDTDDVVRVLPAVLASDEPQFAIRGGEVFVPRL
BGC0002032	A1	M4	EDH	M	Streptomyces sp. S816	Actinomycetes	LDVRVYPDLAALSAALPETETETGSENESGTEPVTVVPCPETPGTPTADRVHAIASEVLALAQSWSARERAGRLVLVTRPGDLAHAAVWGLVRSAQSENPDRFVLAEAEDTDDVVRVLPAVLASDEPQFAVHDGEVRVPRL
BGC0002032	A2	M5	EDH	M	Streptomyces sp. S816	Actinomycetes	GTVVAYVPDLDALAEADGPAQPDVVVVPCPDGPEGVSGAERVRVVTTEVLGLVQRWLAEDRTARLVLVARCDDLAHAAAGGLVRSAQAENPGRIVLLETDRPDEAAALVPDVVRSGEPHVVVRDGEAGVPRL
BGC0002032	A2	M6	EDH	MM	Streptomyces sp. S816	Actinomycetes	VVRAYDDISALLAAPATETGVRAYADAVVVPCPVGSGTAAERVRDVLRKVLGLVQWWLSEDRVARLVLVTRGAVSTGDGPGTGDGPEAGADPDAGGPATADPVQAAVWGLIRSAQSENPDRIVLIDADAHPEVESADDGDGSTDVERIAATVVPRLLAFEEPQAALRGDTLLLPRL
BGC0002032	A3	M7	0DH-BKR	M	Streptomyces sp. S816	Actinomycetes	WAVLGDGGAFSDLDVLRRAVDDGTAVPAHVLLPCAPSRGDLAAATREALADVLSVVREWVADERFSDARLVVLTRGAVELDGPEADVAHAAVAGLVKSAQTEHPDRILLVDVDVDVDHPVADVTTGPALVAALAALDEPQAAVRDGKLYVPRL
BGC0002032	A4	M8	AKR	M	Streptomyces sp. S816	Actinomycetes	WLFAAPEGDEWAETVRTALAGRGARLVPLTVDASADRARLAGELTRAVAEAGPFDGVLSLLATDETATPEHPALSRGLARTVALAQALGDADIDAPLWCATRGAAATGRFDDAPLSAVQHQVWGLGRTLALEHPRRWGGLIDLPATVDERAAGRVAAVLAQNTGAGEWEDQVAVRASGVFTARL
BGC0002032	A4	M9	AKR	M	Streptomyces sp. S816	Actinomycetes	WLLVVAGESEWTDSVRTALTDHGATTVTLVAGPDTDRHALARELADIGPLTGVLSLLAEDGTASAGQPGLPYGLAATLCLTQALGDAGVDAPLWCATRGAVAAGRSDRVDRPLQSQVWGFGRAAALEHPRRWGGLIDLPDLLDARAAARLTAVLGQRAEDQVAVRASGVHGRRL
BGC0002033	srmG1	M1	BKR	M	Streptomyces ambofaciens ATCC 23877	Actinomycetes	VLLLAPDEDTADSGLAPAIARELAVRGAEVHTVAVPVGTGREAAGDLLRAAGDGAARSTRVLWLAPAEPDAADAVALVQALGEAVPEAPLWITTREAAAVRPDETPSVGGAQLWGLGQVAALELGRRWGGLADLPGSASPAVLRTFVGALLAGGENQFAVRPSGVHVRRV
BGC0002033	srmG1	M2	EDH	M	Streptomyces ambofaciens ATCC 23877	Actinomycetes	WTVLGQAAAETVAQPAAHADLTALRTAVAAAGTPVPRLVVVSPVDTRLDEGPVLADAEARARAGDGWDDDPLRVALGRGLTLVREWVEDERLADSRLVVLTRGAVAAGPGDVPDLTGAALWGLLRSAQSEYPDRFTLIDVDDSPESRAALPRALGSAERQLALRTGDVLAPAL
BGC0002033	srmG2	M3	EDH	M	Streptomyces ambofaciens ATCC 23877	Actinomycetes	WAVVGPEAEATAAGLRAVGLDVRTHALPLGEPLPPQAGTDAEVIILDLTTTAAGRTASDGGRLSLLDEVRATVRRTLEAVQARLADTETAPDVDVRTAARPRTAARTSPRVDTRTGARTADGPRLVVLTRGAAGPEGGAADPAGAAVWGLVRVAQAEQPGRFTLVDVDGTQASLRALPGLLATDAGQSAVRDGRVTVPRL
BGC0002033	srmG3	M4	C2KR	MM	Streptomyces ambofaciens ATCC 23877	Actinomycetes	RLLIVPTGDQYTALADTLEQAVASFGGTVRRVAFDPARTGRAELFGLLETEINGDTAVTGVVSLLGLCTDGRPDHPAVPVAVTATLALVQALADLGSTAPLWTVTCGAVATAPDELPCTAGAQLWGLGRVAALELPEVWGGLIDLPARPDARVLDRLAGVLAEPGGEDQIAVRMAGVFGRRV
BGC0002033	srmG3	M5	ER	MA3	Streptomyces ambofaciens ATCC 23877	Actinomycetes	WVLAGPDALGLAEAADAHLPAVPGPDGALPSPTGRPAPDAVVFAVRAGTGDVAADAHTVACRVLDLVQRRLAAPEGPDGARLVVATRGAVAVRDDAEVDDPAAAAAWGLLRSAQAEEPGRFLLVDLDDDPASARALTDALASGEPQTAVRAGTVYVPRL
BGC0002033	srmG4	M6	A1KR	MA21	Streptomyces ambofaciens ATCC 23877	Actinomycetes	WLLVQTPGTAPDEADTAASALGAAGVVVERCLLDPTEAARVTLTERLAELDAQPEGLAGVLVLPGRPQSTAPADASPLDPGTAAVLLVVQAVPDAAPKARIWVVTRGAVAVGSGEVPCAVGARVWGLGRVAALEVPVQWGGLVDVAVGAGVREWRRVVGVVAGGGEDQVAVRGGGVFGRRL
BGC0002033	srmG5	M7	DHT-AKR	M	Streptomyces ambofaciens ATCC 23877	Actinomycetes	WLMVEHGQRTECADAAERALRAAGAEVTRLVWPLEQHTGSPRTETPDRGTLAARLAELARSPEGLAGVLLLPDSGGAAVAGHPGLDQGTAAVLLTIQALTDAAVRAPLWVVTRGAVAVGSGEVPCAVGARVWGLGRVAALEVPVQWGGLVDVAVGAGVREWRRVVGVVAGGGEDQVAVRGGGVFGRRL
BGC0002072	linearmycin	M1	BKR	M	Streptomyces sp. Mg1	Actinomycetes	WLVVVPSEGVDDTAVVAALAGRGAEVRRVVVEAGVDRAGLFSDVGSVAGVVSLLALDEAAGVVSTASLVQALGAAGVVAPLWCLTRGAVSVGRSDRLVSAVQAQTWGLGRVAALELPERWGGLVDLPEVWDERAMARLVGVLAGSGEDQVAVRSSGVFGRRL
BGC0002072	linearmycin M3a	M10	EDH	M	Streptomyces sp. Mg1	Actinomycetes	WAALGTAVPAALLADADAAALTVHAGLAELAAAVEAGAPVPEAVFVGYGQADAIADAIADADADAGAGAPATPELSAEAVHRAAHHALDLARTWLGEAPFTGDRFAATRLVVLTRGAVAADGTDTVTDPVHAAVHGLLRSAQAEHPDRLLLIDTDGAEDSVRALPAALAAGEPQLAVRAGTVHAPRL
BGC0002072	linearmycin M3b	M11	BKR	M	Streptomyces sp. Mg1	Actinomycetes	WLVVVPAEGVDDAPVVAALAGRGAEVRRVVVEAGADRAGLFSDVGPVAGVVSLLALDEAAGVVSTAGLVQALGAAGVEAPLWCLTRGAVSVGRSDRLVSAVQAQTWGLGRVAALELPERWGGLVDLPEVWDERAMARLVGVLAGSGEDQVAVRSSGVFGRRL
BGC0002072	linearmycin M3c	M12	BKR	M	Streptomyces sp. Mg1	Actinomycetes	WLVVVPSEGVDDTAVVDALTARGAEVRRVVVEAGVSGLFSDVGAVAGVVSLLALDEAAGVVSTASLVQALGAAGVEAPLWCLTRGAVSVGRSDRLVSAVQAQTWGLGRVAALELPERWGGLVDLPEVWDERAMARLVGVLAGAGEDQVAVRSSGVFGRRL
BGC0002072	linearmycin M3d	M13	0DH-BKR	M	Streptomyces sp. Mg1	Actinomycetes	LVVIGGAADAAAAALGGAGVPAATYEDLAALDAAITAGRQPMPDTVVVPFTTATTGAPEQVTALLAQEVRETTHRALATVQSWLDNGRFAGARLAFLTRGAVAAHQDTEAGDLAHAPVWGLLRAAQTEHPDRFVLVDLDPGADDIPGRALAGALASTEPELAVRGGALYAPRL
BGC0002072	linearmycin M4a	M14	C2KR	MM	Streptomyces sp. Mg1	Actinomycetes	WLAVVPEAPAGAAGDTVAAVLRTLADRGAEVRTVTVAAGAAGREALTATLKDATAGAPAAAGVLSLLALGGDAAAHALSQALGDAEVAAPLWCVTRGAVVAGRSDRITDPGQALVWGLGRVASMEQGGRWGGLVDLPGTDAADDRTLERLVGVLAGDAAEDQVAVRSSGLFVRRL
BGC0002072	linearmycin M5a	M15	BKR	M	Streptomyces sp. Mg1	Actinomycetes	WLLAIPAGHADDPWAVAAARTLAARGATVSGVTVDAVADDRAALARRITETLAGAPEAAAPAGVLSLLALDERPHPEDPALPAGLAATLALVQALGDADVAAPLWAATRGAVSTGRSDRLASLAQAPLWGLGRTAALELPDRWGGLVDLPPTPDERAAGRLADVLGGPGTEDHLAVRSTGVFVRRL
BGC0002072	linearmycin M5b	M16	EDH	M	Streptomyces sp. Mg1	Actinomycetes	YALLGDSGARIAGDADHYADLAALAAAVDAGAAVPDEVVIRLAPAPGPLSAPAVHDAAHAALALAQAWLADERFAAARLVFLTRGAVAATADEDVSDLAAATVWGLLRSAQTENPGRIALVDADTDTDTDGGHAALRAALGSDEERFALRAGAVLVPRL
BGC0002072	linearmycin M5c	M17	EDH	M	Streptomyces sp. Mg1	Actinomycetes	WAVLGEDPAEFRIAGEPLERHRDLTALRGELADGAPAPDVVVVPLSGTAPAGGRAAAARTAAHQALALVKEWLAEERLDDSRLVLLTSGAVAAVPGEHLTDLAHAPAWGLVRSAQSENPGRFVLADTDGIEASLGSLAAALAGDEPQLALRSGEAYAFRL
BGC0002072	linearmycin M6a	M18	EDH	M	Streptomyces sp. Mg1	Actinomycetes	AAAEQPRLLDGPSAAEALEAFLDTDAPVPDTVLVHLPTAPGLTPEAVRAATHDALRLLRRWLADDRLTDSRLVLLTRGSVAVRTGDRVPDPVHAAVWGLVRSAQSEHPGRFVLVDTDVPPAQVPADALTAALAAREPQLALRDGAAHAPRL
BGC0002072	linearmycin M6b	M19	EDH	M	Streptomyces sp. Mg1	Actinomycetes	RALVGTAVPGLDCAPYADLADLAAAGGDVPDLVFVTSGTQDTPALPEAVHGRAAEGLALVRSWLAEERFASSRLVFVLPGAMPAHGPAGAVRDLAGAALWGLVRSAATEHPGRFALVDLDVDGAVLPEGALLAALASGETELLVRDGSLLVPRL
BGC0002072	linearmycin	M2	BKR	M	Streptomyces sp. Mg1	Actinomycetes	WVAVVPSASEDDALVAGVLGALTGRGAEVRRVVVEPGADRVALAEQLSGFGSASGVVSLLALDEAAGVVATASLVQALGDAGVVAPLWCLTRGAVSVGRSDRLVSAVQAQVWGLGRVAALELPERWGGLVDLPEVWDERAMARLVGVLAGSGEDQVAVRSSGVFGRRL
BGC0002072	linearmycin M6c	M20	EDH	M	Streptomyces sp. Mg1	Actinomycetes	WALLGADPLKTGAGLERAGLLDDPSAATHPDLDALGEAFDLAEALGEPVPETVLVSLAPDLAAPAAASAAHTAARNALELLQGWLADDRFAAARLAVVTRGAIATDPDEDVTDLAHAAVWGLVRSAQAEHPGRFVLVDLDGEDPSYRALPAALATDETQLALRDGAVRAPRL
BGC0002072	linearmycin M7a	M21	B2KR	MM	Streptomyces sp. Mg1	Actinomycetes	WLVAVPETGGAADAVVGVLAEHGADVRQITVPRTHDARAQLVERIRAALADGPEVAGVLSLLTPSAEEAEPIGSAAPAGVSATLALVQALGDADVAAPLWCVTRGAVSVGRSEQQADPAQAPVWGLGRVTALEHGERWGGLIDLPAQADARTLRRLVGVLAGDAAEDQVAVRSSGLFVRRL
BGC0002072	linearmycin M7b	M22	B1KR	MM	Streptomyces sp. Mg1	Actinomycetes	WLAVVPEAVSGPAGDAAAAVLRTLADRGAEVRTVTVAADAAGREALTAALKAATASTAAPAGVLSLLALGDDGAALRAHSGLLGTAALVQALGDADVSAPLWCVTRGAVSVARSERLQDPAQALLWGFGRTAALEFPDRWGGLLDLPAQADDRTLERLAGVLAGDGSEDQVALRASGLFGRRL
BGC0002072	linearmycin M8a	M23	EDH	M	Streptomyces sp. Mg1	Actinomycetes	WALLAGPDAEAGDAGALAGTAARFAAVLPAAAVHNGLAALSAAIEAGGPVPQAVVVPVAAPAAPAPTPADATLPAAVGDALHHALELAQAWLADDRYAGSRLVLVTRGAVATTAGSDVPDLAHAPLWGLLRSAQSEHPDRFVLLDLDDREESLRALPAALATAEPQLALREGRAVVPRL
BGC0002072	linearmycin M8b	M24	ER	M	Streptomyces sp. Mg1	Actinomycetes	WAVIGEPADVTAELPGPVHPGLGALGAALDAGAPAPAHVLAPCLAAPAEALTADAVRAATHRALALVQGWLADDRFAASRLVFVTRGAVATQSDWDLADPAHAAVWGLVRSAQSENPDRFVLADLDADAAAGTLAAALATGEPQFALRRGTVHAPRL
BGC0002072	linearmycin M8c	M25	EDH	M	Streptomyces sp. Mg1	Actinomycetes	WLMLGEEGDGALPAALVVPCVEPAAGDVAGAVHAETARVLGLVQDWLAEERSADARLVFLTRGAVAAVPGEGIADLAHAPVWGLVRSAQSENPGRFVLVDIDAEGDLAAGLSAALASGESEVAVRGGSVLVPRL
BGC0002072	linearmycin M8d	M26	EDH	M	Streptomyces sp. Mg1	Actinomycetes	WALLGDGHAGLDAVGVRYTAHDGGLATLADPALVCVPLSPVSGTEDVTGAVHAETGRVLALLKEWLAEERFADSRLVFLTRGAVEAVPGEGVPDLVHASVWGLLRSAQSENPGRIVLADTDGTDASFRALPAVVASGESEVAVRGGSVLVPRL
BGC0002072	linearmycin M9a	M27	EDH	M	Streptomyces sp. Mg1	Actinomycetes	WLMLGEGTQVFADLAGLGVAAVEGGELPAALVVPCVEPAPTAAVADAVHEATGRVLTLLKEWLSDERFADARLVFLTRGAVAAVPGEGVSDLVHAGVWGLVRSAQSENPGRFVLVDVAEGDLAAGVSAALASGESEVAVRGGSVLVPRL
BGC0002072	linearmycin M9b	M28	EDH	M	Streptomyces sp. Mg1	Actinomycetes	WVMRDEAGAQVLDDLDAIPGALVLSCGEPAATDVADAVHAEAGRVLTLLQRWLSDDRFADARLAFLTRGAVTVAPGDGPADLVHASVWGLVRSAQSENPGRIVLVDVDADGDVEHALSSALASGESEVAVRGGVLLVPRL
BGC0002072	linearmycin M9c	M29	EDH	MM	Streptomyces sp. Mg1	Actinomycetes	WAVVGTDTFGLEAALLDAGITADVYTDLDVLAGVVLAGKPVPDTVLVPYATDPAADTAGATREATHEALKLVQTWLAEETLAGARLVVVTRGAVEARPGEGVADLPGASVWGLLRSAQSENPGRFLLLDLEAGPDGSADGAAAGFAPLLAAAVAGGESQVAVRDGVPHAARL
BGC0002072	linearmycin	M3	EDH	M	Streptomyces sp. Mg1	Actinomycetes	WGVLGRDEIGLAGSTGAQVTEYADAAALGAALAAGEPAFDAVFVVPSAPVPGADVVGSVHTAVNDALAVVQEWLADERFAATRLVWLTSGAVAVGSGEGVRDLAGSAVRGLLRSAQSENPGQLLMLDVDEASLGAVPAALAAGEFELAIRSGVVCVPRL
BGC0002072	linearmycin	M4	BKR	M	Streptomyces sp. Mg1	Actinomycetes	WLVVVPAEGVDDTPVVAALAGRGAEVRRVVVEADADRAGLFSDVGAVAGVVSLLALDEAAGVVATASLVQALGDAGVEAPLWCLTRGAVSVGRSDRLVSAVQAQTWGLGRVAALELPERWGGLVDLPEVWDERAMARLVGVLAGSGEDQVAVRSSGVFGRRL
BGC0002072	linearmycin	M5	EDH	M	Streptomyces sp. Mg1	Actinomycetes	WGVLGRDEIGLGSSTGAEVTEYADVTALGAALAAGEPAPDAVFVLPAASASTADTIGSVHTAVNDALAVVQEWLADDRFAATRLVWLTSGAVAVGSGEGVRDLAGGAVRGLLRSAQSENPGQLLMLDVDEASLGAVPAALAAGEFELAIRSGVVCVPRL
BGC0002072	linearmycin	M6	BKR	M	Streptomyces sp. Mg1	Actinomycetes	WLVVVPSEGVDDTTVVEALVGRGAEVRRVVVEAGADRAGLFSDVGSVAGVVSLLALDEAAGVVATASLVQALGDAGVEAPLWCLTRGAVSVGRSDRLVSAVQAQTWGLGRVAALELPERWGGLVDLPEVWDERAMARLVGVLAGSGEDQVAVRSSGVFGRRL
BGC0002072	linearmycin	M7	AKR	M	Streptomyces sp. Mg1	Actinomycetes	WLVVTAATTAETAGSGLPEIADALRAQGVDVREVALDAAATDRAVVAERLDAALAGNRADGVLSLLALAEAPHPAHPAAPAGLLLTGALVQALGDAGADAPLWCVTTGAVATGPSDRVRSAAQAQIWGFGRVVALEHPERWGGLVDLPAAMDARALDRLLAVLGGDRAAATAGTGSGTDSGTAYEDQLAVRSAGLLARRI
BGC0002072	linearmycin M2a	M8	0DH-BKR	M	Streptomyces sp. Mg1	Actinomycetes	WAVLGSTGSGPGTRHADLAELAAAIDAGAPVPAYVLAPFPRQADGLAPDTLSEAAHRALALVRGWLADTRFETSRLVVVTSGAVAGSGEGGTDLPHAAVRGLLRSAETENPGRFLLADVRDLADLDDPAGAALLAVALASGEPELLLRDGAVHVPRL
BGC0002072	linearmycin M2b	M9	AKR	M	Streptomyces sp. Mg1	Actinomycetes	WILPVPAAQAQDPWVRALTDRMSGDGARIVPLPLDVADGDPAVLRAHLAAAGPVNGVLSLLALDERPHPEHPSVPVGLALTAALATALTSEPDADADQPNGYANAPLWCVTRDAVAAAPADTLGGAAQSQVWGLGRVISLEHPGSWGGLVDLPEVCDERALSRLSAVLTGAGDEDQLAIRAAGPLVRRL
BGC0002124	SF8487 madAI	M1	EDH	M	Actinomadura verrucosospora	Actinomycetes	GLALTVADLRPDDVRVEAAAVHETSERALRVVADWLTADHPEDARLVVLTRAAVGVHDGEDADPAQAAIWGLVRSAQAENPGRLLLADTDDEKDAAVLDACRAAAAADEPQLALRAGKVLVPRL
BGC0002124	SF8487 madAVI	M11	ER	MM	Actinomadura verrucosospora	Actinomycetes	VAILASHGPGLARLLHAASTVPAQVYEDLRQIAEPPPVLCVPCEPDDGDPAGPAHAVTRQALDLLQRYLADERLNDTRLVLVTRDAVSVDTDVAEREARGLAQSPVWGLVRSVQAEHPDRVTIVDVDGRPASHTALAAAIGIAAAQDEPQLAVRDGAIHAPRL
BGC0002124	SF8487 madAVI	M12	0DH-B1KR	MM	Actinomadura verrucosospora	Actinomycetes	VAILNPCGSELAEELRTTLGYDDVNEDAPSSIVLIPWSAPGGEVLARAHSAVQDLPELLRRCLADDRFTGSRLVLLTANATAATDQDAVNLAESPAWGLACSVQAEHPGRLTLIDIDGRDTSLQTLPSAIAIALDQDEPRLAVRGTGIHAARL
BGC0002124	SF8487 madAVII	M14	CKR	M	Actinomadura verrucosospora	Actinomycetes	WLVPVPAALADEPMVAGILGTLAEAGATARMIPVEARESDSLARLLRGASLDTGAAGVLSLLALDRERQPGTSAVPAGLALTAALIGALGDAGLDAPVWIATRGAVQADGSEPGPDPLQALLWAYGQVVAEERGSGPVSLIDLPEHLDGGARTRLGAVLAGTGAADQIAVRGTVAYASRL
BGC0002124	SF8487 madAI	M2	ER	M	Actinomadura verrucosospora	Actinomycetes	WAVLGAGGLGLSRALESCGARVHHHPDLAGLAASIEAGAPVPDFVALPCGDPAGTGGGEAAEQMTVAVLSTVQRWLADPRFEASRLAVFTRGAVEAGGGEVTDLACAPLWGLMRSAQAENPGRFLIVDLDGDPASSGAVAGCLPMAAGADEPQLAIRRGEVLVPRL
BGC0002124	SF8487 madAII	M3	EDH	MM	Actinomadura verrucosospora	Actinomycetes	WAVIGADALGLVPALEVGEARVRRYPDLTALAESADPVPDAVLVSYGAEAPDSAAIGVRAREAACAALNLVQGWLSDERFEASTLLLVTRAAIAAGEHDGVADLVHAPVWGLLRSAQAENPGRFVIVDIDGSDDPARSLTAVLSSGAEQAAVRDGAVLVPRL
BGC0002124	SF8487 madAII	M4	ER	MM	Actinomadura verrucosospora	Actinomycetes	WALVGDDPMGLSDAFQIPELKMRAHPDLAALARRSDAEIAPMVLACCPPPAGTMDDPAAEAHRAAAEALRLVQDWLAEPRFEDARLVVVTCGAVAAGTDDDVAGVAHAPVWGLLRSAQSENPGRFLLADVDGEADSLRSLPVAIAAAVGEGEEQIAVRRGQARIPRL
BGC0002124	SF8487 madAIII	M5	0DH-BKR	M	Actinomadura verrucosospora	Actinomycetes	WVVLGTESELAPAYADLRALGDTLSPGAPVPELVVFPCPVVPGNVPSSARRVTADVLEVLKAWQSDERFAASRLAVVTRGVAETADPAHAAVCGLVRAAEAENPGRFALVHLDPAVTSFEVVTEALRRSDEPELAIREGAILVPRL
BGC0002124	SF8487 madAIV	M6	EDH	MM	Actinomadura verrucosospora	Actinomycetes	WAILGTDDLGLEPDLGPFADLGQAADAGDVPDTVITVCSSDGIGDLAEAAREAGAAALGLVRAWLEDRRWESSRLVVVTRGAVSTRTGEDVADLAAAPVWGLIRTAESENPGRFLLADIDGHPDTARLLPGLVRAASASGETQIAVRQGTALVPRL
BGC0002124	SF8487 madAIV	M7	B1KR	MM	Actinomadura verrucosospora	Actinomycetes	WLLVTPPSIDAWPEACHEAMAGPGGADVVRLEADPDALDRVSLAERLSGQAVQGVVSLLALDGRVALAGTTALLQALGDAGINAPLWCITRQAVSTGPADPVDDPAQAAVWGLGRAAALERTDRWGGLIDLPERPDGEAWARFAGVLAGANGEDQVAIRPMGVLACRL
BGC0002124	SF8487 madAV	M8	ER	M	Actinomadura verrucosospora	Actinomycetes	YAILGEHDPDLADALAATLPSDTRIYDAFADLFEDDGDGTPPDVILVPCPPATDDDLARRARTATRQVLGMIQRYLADERLASSRLVLLTTGAAAVAGPAAVDLAQSPLWGLARSVQAEHPNRVTIVDLEGTPADRQVLATVLAQPEPQLAVRGGVVHGARL
BGC0002142	gargantulide PKS1	M1	ER	MM	Amycolatopsis sp. CA-230715	Actinomycetes	AAFAELADSGVRVARRFDDPAALAAAITAGAEEPEVVFASCTAGPESVAHNALALLQSWLAEEQLDAVRLVVVTHGAVATAPGEDTPGLSSAAVWGLVRSAQSENPGRFVLLDLDEAEAPAEVLAKALATDEPQLAVRGGGVLVPRL
BGC0002142	gargantulide PKS3	M10	B1KR	MM	Amycolatopsis sp. CA-230715	Actinomycetes	WLVVVADGVEHEWVPAATAALAEAGARVAEVRLSADDRDRDDLARRLREAAGEEPVAGVLSLLGLDERPHPEHPVLTTGLTASVLLVQALAETGLGARLWFATTGAVSVGRSDSLTGLAQSPVWGLARSVGMEYAATWGGVVDLSVSSEGRATARLVSVLAGLDEDQVALRDSGVFACRL
BGC0002142	gargantulide PKS3	M11	0DH-BKR	M	Amycolatopsis sp. CA-230715	Actinomycetes	LAVLGDAIDGVTGAESYVDLASLAAAVDAGAPSPEAVLVRVADPTGAVDATGIAAGVRQVTGRVLALLQQWLADDRFAASKLVLVTGGAVAAVPADSPNLVTAPVWGLVKAAQAEHPDRLALVDVPGGAEWPRVLGAVFESGEHQLAVRDGALRAPRL
BGC0002142	gargantulide PKS4	M12	BKR	M	Amycolatopsis sp. CA-230715	Actinomycetes	WLLVLPDEGRFDEAERVLRDSGAQVRPLVLAEADLDRSSLAAELAELAADGPFAGVLSLLGLDERPHAEFPVLPLGLSGTLTLVQALEESGVDGPLWTVTSGAVTTGDGAPVNPVQAQIWGLARTVPLEHPERWGGLVDLPSEADERAWSRLAGVLAAGGGEDQVAVRASGVFGRRL
BGC0002142	gargantulide PKS4	M13	B2KR	MM	Amycolatopsis sp. CA-230715	Actinomycetes	WLVLGSDGSDRGAIDALRRHGARTVEVTPADLADRETMAAAVREAMDGAGVTPAEVIGVWSLLALAENPLPDLPAVPSGMAGTLTLLQALGDLRVDAPLWCATRGAVAVTGADPVDHPGQALVWGLGRIAGLEYEQRWGGLVDLPDAVGETAQDRLAGVLSGRGVEDQLAIRESGVYGRRL
BGC0002142	gargantulide PKS4	M14	A1KR	MM	Amycolatopsis sp. CA-230715	Actinomycetes	WLLVTAPGHEDTVWLAEELRAHGADVVTIEAGELDRAGLTARIDEQGEIAGVLSLLGTDTRPCAGHPVLPNGIADTVTLIQALVDSAVVAPVWLATRGGVSVGRSDRAADPAQAQVWGLGRILGLEHPDRWGGLLDLPATADDRAAARVVAVLAGIEDEDQVAVRDSGVFARRL
BGC0002142	gargantulide PKS4	M15	AKR	M	Amycolatopsis sp. CA-230715	Actinomycetes	WLVVVPTEAGEHDWVTGALDALASGGAETVRLDLAESELDRAVLAERIASAVGERPLSGVLSLLGFDERPHSGDPAVPVGVFGTVSLLQSLADAGLEVPLWLGTRGAVSVGRSDRLTSPVQAHLWGIGRVIGLEQPQRWGGLVDLPATATARLGARLVAALAGIDDEDQLAVRDSSVFGRRL
BGC0002142	gargantulide PKS5	M16	BKR	M	Amycolatopsis sp. CA-230715	Actinomycetes	WLVVSTDAVGEHPVADALAAHGAEVVRIELAATGLDRAAVAERLRAAAADQAPTGVVSLLDLSGTLTLVQALEDSGLDGALWTLTRGAVSTGGREQVDPVQAQLWGFGRVAAMELPRRWGGLVDLPADPDERAWSRLVSVLAGGGEDQVAVRPSGVFGRRL
BGC0002142	gargantulide PKS5	M17	AKR	M	Amycolatopsis sp. CA-230715	Actinomycetes	WLLVVPAGHDGDWADEALTAAGAQVSVLHLDEDDLDREALAGRLRDEAPLSGVVSLLGTDERASAEFPVVPAGVAGTLVLAQAMADAGLESPLWSVTSGAVSIGGSDRLGSPAQALVWGLGRVIGLEQPRRWGGLIDVPETVDERARARFVSALAGIADEDQVAVRSSGAFGRRL
BGC0002142	gargantulide PKS5	M18	BKR	M	Amycolatopsis sp. CA-230715	Actinomycetes	WLAIGEVPALPGADLVRVDLGERADLAATLGDLEPGFAGVLVAADLYGFVAAVQALQDADVDARIWGVTRGAVAVGTEGADPDAALVWGAARSVALEYPLRWGGMVDLPPAPDERTAGRFASAVGSGEPEVAVRGGGLFARRL
BGC0002142	gargantulide PKS5	M19	AKR	M	Amycolatopsis sp. CA-230715	Actinomycetes	WLVVTGPDEAPSWVADAISAAGAEVELLELADADREEIAAKLAAFDELSGVVSLLGADETPSEAHPALPTGLARTLALVQAMADSGLDRPLWLVTHDGVSVGKADSPATPAQARVWGFGRVIGLEHPRRWGGLVDLPVEGDQRARGRFAAVLAGIGDEDQLAVRDSGVFARRL
BGC0002142	gargantulide PKS1	M2	ER	M	Amycolatopsis sp. CA-230715	Actinomycetes	CVALGTDSLGLPVFADLAALAGSGAVPSAVVVPVSGRAGSPVGAARSLAGSVLGLVQEWLADDRWLGTKLVLVTTGAVAVRPGEVIDPAVAAAEGLARSARSEHPDRFLVLDHDGGALAPGLLGALLALDEPQLAVREGAVYAPRL
BGC0002142	gargantulide PKS5	M20	ER	M	Amycolatopsis sp. CA-230715	Actinomycetes	VVVLGEDALGIGAESYPDLDAMPEADFVAVAIVPKSTVDADGVRAATADVLELLQRWLAEDRFADAKLVVCTRGAVAVAGEPVTDLAGATVWGLVKSAQAENPGRIVLADLGEGTAPAVADLVATGEPQLAVRGDSVFAPRF
BGC0002142	gargantulide PKS6	M21	BKR	M	Amycolatopsis sp. CA-230715	Actinomycetes	WLLVVPEDETALPEALESRTGELVVLRVPEDIDRALLAERIRESAPEGGFAGVVSGVGLFGVLALVQALEDAGVAGRVWAVTRGAVDAGDRVTDSEAAMVWGAGRSIALEYPQRWAGLIDLPEILDDRVVGQLTGALTGTEVEVAIRNAGVLARRL
BGC0002142	gargantulide PKS6	M22	A1KR	MM	Amycolatopsis sp. CA-230715	Actinomycetes	WLLITEGETDHAAWFADTLRTHGADVVTVEAGELSARINELGEIAGVVSLAAGVAETLMVVQALLESAVSAPVWIATRGAVSVGRSDRAADPGQAQIWGLGRILGLEHPDRWGGLLDLPATADDRAAARVVAVLAGIEDEDQVAVRDSGVFARRL
BGC0002142	gargantulide PKS6	M23	BKR	M	Amycolatopsis sp. CA-230715	Actinomycetes	WLLVVPEDETALPEALERAGELVVLRVPEDIERTTLAERIRESAGDDGFAGVVSGLGLFGVLALVPALEDTGVAGRVWAVTRGAVDAGDRVTDPGAAMVWGAGRSIALEYPQRWGGLIDLPETLDDRAIGQLTGALAGTEVEVAVRGAGVLARRL
BGC0002142	gargantulide PKS7	M24	EDH	MM	Amycolatopsis sp. CA-230715	Actinomycetes	CALVGGDRHGFADALLAAGTAVAEYTDLDALGDAIDAGAAFDDVLFVPSTVDNAVADVYAVTEHVLDVVRRWLADERFSAAKLLVLTRNAIAAERAEDVTDFPAATIWGLVRCAQAENPDRVSLLDVDDTAESHRALLAAAGSGEPQLALRSGVVRVPRL
BGC0002142	gargantulide PKS7	M25	BKR	M	Amycolatopsis sp. CA-230715	Actinomycetes	WLLVVPENGTVLAEALGSRIGDLTVLSVPEDIDRAALAEKIRESAGDDGFAGVVSELGLFGLLALVQALEDTGVTGRVWGVTRGAVTAGDRASDPGAAMVWGAGRSIALEYPQRWGGLIDLPESLDDRAIGQLTGALTGTEVEVAIRGAGVLARRL
BGC0002142	gargantulide PKS7	M26	0ER-0DH-C2KR	MM	Amycolatopsis sp. CA-230715	Actinomycetes	WAVLGADDLGLTAALDAAGIAAEHHHDPADLAQVPELALLPVRSTVDAREVTAEVLGTVRSWLADDRFAGTRLVVITRGAVVAAPGDPIDPAQAAIWGLVRSAQAEHPGRFLLVDLDGADGSTGLLPAAVEADEPLLAIRSGVVRAARL
BGC0002142	gargantulide PKS8	M27	AKR	M	Amycolatopsis sp. CA-230715	Actinomycetes	WFVVAPEGSEDSDRIAELVRAKGADAVVVAGGTDRAALGARLGELAPPAGVVSLLGLDERPHPEFPAVPLGVAATVALVGALADLGIEAPLWLLTRAAVAVGRADAAPSPAQAQVWGLGRVIGLEHPQRWGGMIDLPAVLDDRAAARVVAALSGIEDEDQVAVRDTGVFARRL
BGC0002142	gargantulide PKS8	M28	ER	M	Amycolatopsis sp. CA-230715	Actinomycetes	SVTLGADWGLSALDGVPELVLAEVPSSSGVDASEVRGVVGDVLSLVRSWLADGRCAGSRLVVVTRGAVPVGGSDVDVVGAAVWGLVRSAQSENPDRLVLVDTDGSLDPGAAVGTGEPQVAIRDGVVWAPRL
BGC0002142	gargantulide PKS9	M29	ER	MM	Amycolatopsis sp. CA-230715	Actinomycetes	AALGADALGIAGAGTYADLTALAEAIEHGAAVPGAVLTELPEVSSVDAVGVRTSTNLVLDLMQRWLAEDRFADSKLVLLTKGAVLGDGATDLVAAPAWGLVRSAQSENPGRFVLADVDDTAGAALAAALATDEPQLALRNGTLYVPRL
BGC0002142	gargantulide PKS2	M3	BKR	M	Amycolatopsis sp. CA-230715	Actinomycetes	WLLITGTADAVADELAGALAQAGAEVVRVAADEVPGVDPAGVTGVVSLLALDADAISAGVVDTVALVQALGVAGVDAPVWCVTRGAVSVGRSDRVDALVQAPVWGLGRVLSAEQPQRWGGLLDLPETLDERALSRLVTVLAGSGEDEVAVRSTGLFARRL
BGC0002142	gargantulide PKS9	M30	A1KR	MM	Amycolatopsis sp. CA-230715	Actinomycetes	WLLITESEEAAWFADALRAHGADVVTVEAGELSARITELGEIAGAVSLASGAAETLVVVQALLDSTVAAPVWIATRGAVSVGRSDRAADPELAQIWGLGRILGLEHPDRWGGLLDLPASSDSRAAARVVAVLAGIGDEDQVAVRDSGVFARRL
BGC0002142	gargantulide PKS9	M31	ER	M	Amycolatopsis sp. CA-230715	Actinomycetes	VAALGTALGLDVPVHATLAELGTEPEFVLAELPAQSEVDARAVRDAVLGTLELVRSWLAEDRFSGSRLVVVTTGAVSTGEAVTDLAGAASWGLVRSAQSENPGRIVLVDVDGTEESSAALLAALALDEPQLAIRGGVAFAPRL
BGC0002142	gargantulide PKS10	M32	A1KR	MM	Amycolatopsis sp. CA-230715	Actinomycetes	WLIVAPAGEDALADGVAEAVREHGGQPIRVDVTENLPGGTFAGVISLLGTDVRPHEEFPVLPAGVAGIVALAQALAAAGIEAPLWTVTRGAVAVGAADRIADPLASQVWGMGRVLGLEHPNRWGGLLDLPERLDERARGRIAAALAGIGDEDQLAVRDSGVFARRL
BGC0002142	gargantulide PKS10	M33	ER	M	Amycolatopsis sp. CA-230715	Actinomycetes	SVVLGADWDLSALDGVPELVLAEIPSSSGVDASEVRGVVGDVLSLVRSWLSDGRCGGSRLVVVTRGAVPVGGSDVDVVGAAVWGLVRSARSENPDRLVLVDTDGSAELAGVVAGAGEAELAIRDGAVWAPRL
BGC0002142	gargantulide PKS10	M34	ER	M	Amycolatopsis sp. CA-230715	Actinomycetes	WAIVGVDDFGIGHELIVKGILVEYHDDLAALGEAVAAGAPVPEVVFASFRGESDVDTAASARSLTARALALVQGWLADDRFAASRLVVTTSGAVAVSPGEAVRDLAAAPVWGLLRSAQSENPDRFVLLDAEEGDDVVDLVVPSAVGSGEPQVAIRDGAVRAPRL
BGC0002142	gargantulide PKS2	M4	ER	M	Amycolatopsis sp. CA-230715	Actinomycetes	WSVLGPDPLRLAESGVDITTCESLDAVTSVPDVLFVPCAPESAVDPDAVRRVTNRVLGLVQSWLADDRFAESRLVLVTRGAVAATPGEDATDLAHAAAWGLVRSAQSENPGRFVLLDLDDAPESARRIAAVLATDETQVAVRGGEVRAARL
BGC0002142	gargantulide PKS2	M5	BKR	M	Amycolatopsis sp. CA-230715	Actinomycetes	WLLITGTADAVADEVAGALAGAGAEVVRVAADEVSDVDSTGVTGVVSLLALDADAISAGVVDTVALVRALGVAGVDAPVWCVTRGAVSVGRSDRVDALVQAPVWGLGRVLSAEQPQRWGGLLDLPEVLDERALSRLVTVLAGSGEDEVAVRSTGLFARRL
BGC0002142	gargantulide PKS2	M6	BKR	M	Amycolatopsis sp. CA-230715	Actinomycetes	WLLITDSAADDVALLEGALVRAGAEVVRVRADEVSDVDSTGVAGVVSLLALDVDSAVSGVGDAIGVVRALTEAGVAAPVWWVTRGAVSTGRSDQVDALTQAPVWGLGRVMAAEQPHRWGGLLDLPATVDERALSRLVAVLTGIGEDEVAVRSTGLFARRL
BGC0002142	gargantulide PKS2	M7	A1KR	MM	Amycolatopsis sp. CA-230715	Actinomycetes	WLLISEPETETAAWFADTLRAHGADVATVEAGDRTGIDELGAVAGVVCLVSEVAQTLTVVQALLDSTVTAPVWIATRGAVSVGRSDRAADPELAQIWGLGRILGLEHPDRWGGLLDFPATSDSRAAARVAAVLAGIDDEDQVAVRDSGVFARRL
BGC0002142	gargantulide PKS2	M8	0DH-BKR	M	Amycolatopsis sp. CA-230715	Actinomycetes	CAALGTDSRGLPVFADLAALAGSGEVPSVVVASVPGGGSPVEAAKSAAGAVLKLVQDWLADDRWLAAKLVVVTKGAAAVEPGEVIDPAVASAVGLVRSAQSEHPDRFWVLDHDGDTLTPALLGSLLELDEPHLALRDGAVHAPRL
BGC0002142	gargantulide PKS3	M9	ER	MA4	Amycolatopsis sp. CA-230715	Actinomycetes	WVVLGEDRFGLGDFLTYPDLAALIAAVDDGAPVPEVVIAPETVPLSGNPADAARTAAAKALGLAQTWLADDRFDAARLVLVTSGAVAVDAESDVTDLASASAWGLLRSAESENPGRFVLADLDGHADSPRALVAALTTDEQQLAVREGIVRAPRL
BGC0002291	efomycin PKS1	M1	0DH-B1KR	MM	Streptomyces sp. M56	Actinomycetes	WAVLGDDPLGLSVAVDAVPYDETAEVPDAVLVPCAAESRADVAQAAHEATHRVLALIQRWISDERLAPSRLVFVTRGAVAAVPGEEVPDVAHGAVWGLVRSAQSEHPGRFTLVDLDTDPESATALPVAVASGEPQCAVRDGLVRVPRL
BGC0002291	efomycin PKS1	M2	AKR	M	Streptomyces sp. M56	Actinomycetes	WWVAVPEGRADSARVAAVVAALGRRGARVVPLTVATTGRDAVRDAGRDVLAERLRREADTGGTPAGVLSLLAFDDGPHPEHTALTTGLALNVGLVQALGDAGIAAPLWLATTGAVSVSGSDPLGSPAQAATWGLGRVVALEHPQRWGGLVDLPGDLDERSADRLCAALSGIVGDSGPEDQLALRDAGVFVRRL
BGC0002291	efomycin PKS2	M3	C1KR	MM	Streptomyces sp. M56	Actinomycetes	LLVAVPAEAGPADSGAVDSGAAETGAIETGAAEAGPVATGPVATEAIVAGLAALGVETVPVRIGADDTDRDRLATRITEALGEAGAPGGVVSLLALDEAPHPEHRDIPTGFATTLALVRALGDAGIDAPLWCVTRGAVSTGGADRLGAPAQALIWGLGGAVALEHPQRWGGLIDLPGSLDEGSLRALTRALGGRGGGEQLAIRASGTLARRL
BGC0002291	efomycin PKS3	M4	A2KR	MM	Streptomyces sp. M56	Actinomycetes	WLLAVPAGHLVGHDVEHSVGHPVGHPGTELIDAVRDGLETHGATVVTVEVAEADRAAVAARLAEATAGAAPSGVLSLLGLPDAPHPGHAGVPMGLALTLALVQALGDTGVAAPLWLATRGGVSVGGTDALDSPAQAAVWGLGRVAALEHPQRWGGMIDLPDTVDGRVTTRLCGALAGRLGDEDQLALRPSGVFVRRL
BGC0002291	efomycin PKS4	M5	B1KR	MM	Streptomyces sp. M56	Actinomycetes	WLIAAPAGAPEGPRVAEALRERGAQVRLVELTEADAVREALARRLDEATADAPPTAVLSLLALAEEPYRAGTAQPLGLALNLALLQALGDTGADVPLWYATRGAVSVGRADVLDHPLQALTWGLGRIAAAEYPRRRGGLVDLPGTLDDRAVARLCGVLAGRLTGEDQVAVRASGVHGRRL
BGC0002291	efomycin PKS4	M6	EDH	M	Streptomyces sp. M56	Actinomycetes	WTLLGDDDFKLVGLDVRTYPNLAALPADPAAMPATVLVPCAPEPRGVADAVRTATHRALTLLGAWLTEERFADSRLVFITRGAVATTPGADVPDPAHAAVWGLVRSAQSENPDRFVLVDLDEHEESALALPIALALDEPQLAVRRGDITVARL
BGC0002291	efomycin PKS5	M7	EDH	M	Streptomyces sp. M56	Actinomycetes	AALVGDDGLEVTESLFAAGVHLESYVDLESLGAAVDAGTAAPAAVLVCCQAGPGAPAAAVRDSLRTALELARSWSADERFADSRLVFITRGAVATAPGAEVTDLPGAAVWGLVRSAQSENPDRFTLVDLDGHEESVRALPAVLPSGEPQLALRAGQPHTPRL
BGC0002296	vatK	M2	CMT-ER	M	Moorena producens ASI16Jul14-2	Cyanobacteriota	WLILADTQGIAQHLASQLRSVGDVCTLVFAGESYQQLAPEEFTINPDNLSEFEQLIETLAAKSPSLSGVVQCWTTEAGLGKTINSEELENLSRLGCGTTLSVVQALVKAGLSQSPRLWLVTNGAQPVPSNYPVIPGVAQSSVWGMGKVISLEHPELNCTRIDLDPEETIEGQADALFNEIWSEDSEDQVAWRGDGRYVARL
BGC0002296	vatM	M4	ER	M	Moorena producens ASI16Jul14-2	Cyanobacteriota	WLVFALTDELVDSVGKYLEERGQNYIWVSPGSEYQQLDAQHYQINPTVAEQFPKLLQDNSDIKGILHLWGIINEVEDLQTAQQLGCATALHLVQALVQAGLTNVTPMWLVTQGTQSILDEAEVVQPQQGTLWGLGRVISLEHPELRCGRIDLDPKTNVSEMLPSLVNEVFYKNNEDQIAIRQGVRYVARL
BGC0002308	camE	M1	EDH	M	Streptomyces sp.	Actinomycetes	WTELSDDTPDFTEAPDTGTAVVRVGAHETDGTLTADATARTLRLVQRWLADEQLTEARLAVVTTGAVAALPGEDVPGLGSAPVWGLIRSAQSEHPGRFTLIDLDDPADDDALTAALALDEEQVAVREGRCHVPRL
BGC0002338	spa1	M1	ER	MM	Myxococcales bacterium	Myxococcota	WLLLMDDGGAAAALAFLLLARGEACVRARPGERFARLESGLFEIDPKNPEHYRRLLREAFGKDVLCRGVVHMFALDAAPWEATTPQTLDEDVTRGSLSALYLLQALLRQGWRDVPRLWLVTRGAQPVLANGVPLAAAQAPLWGLGRTIALEHPEVECTRVDLDPARNPDEASLLLRELSSRDREDQIAHRTEGRHVARL
BGC0002338	spa2	M2	EDH	M	Myxococcales bacterium	Myxococcota	WLLLVDAAGTGAALAARLRARGHTCIEVVPGDRYQQLEPSLYRIDPTSSHDYRRLLQEAFAKGKPCRGVVHLWSLDVAPFERTSGDTLAVARDWGVGSALFLAQALLWQAWRDTPRFVLVTRGAQPAGDGSVPVSAAQAPLWGLARTIALEHPALECARVDLDPAGGIEEPELLMHELFATDREDQVALRGLRRLAARL
BGC0002338	spa3	M3	BKR	M	Myxococcales bacterium	Myxococcota	WLLFSDHGGTGEALAALLRERGEPCVLVARGERYEKVGPGSYRIALSNRDDYQRLLADAFREGSPCRGVVHLSSLDAAPWELTTADTLDSDQWSGTFSALHLVQALLRQDWRDKPRLWLVTRGAQVAEEAQSLVSPAQAPLWGFARTLVLEHPELDCVRIDLDPEGSAGDATALAAELDADDGEDQVALRRAGRFVARL
BGC0002338	spa4	M5	CKR	M	Myxococcales bacterium	Myxococcota	WLILADRGGAGEALAARLRERGEACVQVTRGQRYERVDADLYRLDPASSDDHRRLLEEAFGKGRRCRGVVHMFGLDAAPWGEATAEAILTEQRSGVAAASYLVRALLRQGWRDKPVLCLITRGAQAAGDAPVHAPAQAPLWGFARTLELEHPELSCTRIDLDPAENANDACALAEELLASDGEDMVALRGGDRFVARL
BGC0002338	spa4	M6	ER	MM	Myxococcales bacterium	Myxococcota	WLVLADEGGLGRAIAARLRAQGEQCVEVLAGAGYERLGRWEHRLDGTDPAALARLLGEAFGENRQCKGVVHLWSVDGARWEQARLETLEAELRRSCLSALRLTQAVLGHDFRDVPRLHLVTRGAQRAGTDTGPSSVAQAPLWGLGRSIALEHPELALVCIDLADRPLPDEAERIAEELWRGGGGEQIALRAEGRYVARL
BGC0002349	epemicin PKS1	M1	A2KR	MM	Kutzneria sp. CA-103260	Actinomycetes	WLVVVPADASGEISTAFDTASVVRVVVDSADRAALAERLRALGTHFSGVFSLLAHDRRPDREHPTLCFGVTATLALAQALGDAGIEAPLWVATSGAVTTGKSDPITDPAQALLWGLGRVIALEHPTRWGGLVDLPEQLDKRAADRLCSVLASTSGEDQVAIRATGIHGRRL
BGC0002349	epemicin PKS4	M10	BKR	M	Kutzneria sp. CA-103260	Actinomycetes	WAVVATPSELTDQVVTALRAHGVTVELIEPADRAELADRLRGQTFDGVLSLLGVDEEPHPTASEVPAGLVSSLTLLQALSDAGIKTRLWTATRGAVAVARWDGTPSPAQATVWGLGRVAALEFPELWGGLVDLPAEFDDRAARRLFSVLAVGDEDQVAVRANGVYGRRL
BGC0002349	epemicin PKS4	M11	AKR	M	Kutzneria sp. CA-103260	Actinomycetes	WLVVGSDTLAQALNTTSVTLDELATAVTADLSGILYVAGEEATVPSGLAQIADVLRTLGEQSITAPLWVATRGAVSVGRFDSAPDPAQAAVWGLGRVAALEYPRNWGGLVDLPETLDERAANRLRQVLAGTGEDQVAVRTSGVFVRRL
BGC0002349	epemicin PKS4	M13	B1KR	MM	Kutzneria sp. CA-103260	Actinomycetes	WLLVVPAGHSAEWPQSLARYGAEFVTVEVAEDADRLRLADQVGGREFAGVLSLLALNEKPSAAHPEVPAGLDLTTALVQALGDAGVEAPLWCVTSGAVSVGRSDALANPIQALVWGLGRVAAMEQPQRWGGLVDLPGTVDDRVVRRLASVLADSDGEDQLAIRGSGVFGRRL
BGC0002349	epemicin PKS4	M14	EDH	M	Kutzneria sp. CA-103260	Actinomycetes	VAVLGADELKLAAALELDRHEDLASITSMPDVLLVPRLTNGHTTGDLATDVRVAVREVLDLIQSWLADERLASTHLVLVTRGAVAANEDEAVRDLAHAAVLGLVRSAQSEHPGRLTLVDVDGELESVAALPAALTVGESQLVIRNGEVRIGRL
BGC0002349	epemicin PKS5	M15	BKR	M	Kutzneria sp. CA-103260	Actinomycetes	WLVIAPAGCDETVQDALRSHGATVTTLPVQADEDRETLTQRLGALDVRPDHVVSLLALAESTNSDVPTGLALTVTLIQALGDTDTRARLWCVTRGAVTAGRWDRLTDVDQAAVWGLGRAAALELPDRWGGLVDLPAELDDRAIARLVAVLAGLDGDEDQVAVRANGVFVRRL
BGC0002349	epemicin PKS5	M16	B1KR	MM	Kutzneria sp. CA-103260	Actinomycetes	WVLVTPEDEQSQHALAAAMTERGAEVVTVAVDLDSADRAGLAEKLRTVPGSVNGLVSLLPLDERVLAGHEAVPSGYAATIALVQAMGDVDLDAPLWCVTRGAVSTGATDQLANPSQALVWGAGRIVGLEHPSRWGGVIDLPAELDERAVQRFCGVLAGADGEDQVAIRSQGVYVRRL
BGC0002349	epemicin PKS6	M17	EDH	M	Kutzneria sp. CA-103260	Actinomycetes	WAVLDGDEGADLGLAAGAVWTALDIDGLMASVAGGITSPDYVVLPCVGSGDDPTADLGAAIDRALTHVRSWLADDRVVDHQLAIVTRGAVAATADSDVTDLANSALWGLIRSAQAENPGRFILIDVDGTESSRAALPAALASGQSQLALRDGVIHVPRL
BGC0002349	epemicin PKS1	M2	A1KR	MA3	Kutzneria sp. CA-103260	Actinomycetes	WIAVVPEVEIEAVTTLLDRLRAQGLQIMTSTLSAVDFLMAEGVLSLLGLDTRPHPDHPELSVGVVDTMRLVTSLTEAGTKTPLWCVTSGAVSIDPSDLVTDPVQASLWGAAAVLSLDEPDRWGGIIDVPAVVDDRAAAELCAALADGSEDQVAIRAGGRFGRRM
BGC0002349	epemicin PKS2	M3	EDH	M	Kutzneria sp. CA-103260	Actinomycetes	AEAVAPDHTVFEPDATSVRTATYATLERLQAGEPVVVVTRGDLPGAAVAGLIRSAQLENPDRFVLVDAEPGMDVEPLLPRIIGSGRSELRVRDGELFAARL
BGC0002349	epemicin PKS2	M4	BKR	M	Kutzneria sp. CA-103260	Actinomycetes	WVLAVPENELDSGVVGSVAKQLRERLGEVVPLVVGDVDREILAGRLAELPAEVNGVISLLALDDQADPDHPEVSAGVGRTLTLVQAAGDAGRTTPLWCLTQGAVAVDDCDPLSSLPQAGMWGLGRVIALEYPQQWGGLIDLPEVLDDRAAERLIDALAGPGGEDQLAIRAAGVFAPRI
BGC0002349	epemicin PKS3	M5	EDH	MM	Kutzneria sp. CA-103260	Actinomycetes	DNSEYVVRDAPHDLHEALALAQEWLANEQSRLVLVSTGAVAVGADEDVPNLMAAAVLGLFRSAQNENPGRFTLIDIDDEPASREAVDAAARTGEPQIAVRDGELRMPRL
BGC0002349	epemicin PKS3	M6	B1KR	MM	Kutzneria sp. CA-103260	Actinomycetes	WLVVTPSAEHNWTIGDNTIHVVTDGGDRATLAEQLRAGLAEPVAGVVSLLALDRPVTATLHLTQALGDIDADAPLWLVTQGAVSIGDNDRIGDPEQAQVWGMGRVIALEHPERWGGLVDVPADVDDIVLRRLTGVLAGHDDEDELAVRAAGVFARRL
BGC0002349	epemicin PKS3	M7	AKR	M	Kutzneria sp. CA-103260	Actinomycetes	WLALAPTGQGQDHLDALTGAEIVRVDVDLTALDRQGLAERLAGERVDGVLSLLALDENHGVTATLVATQALRDAGIDAPLWILTSGAVSTGRSDQVTSASQSQVWGFGRVVGLEFPNLWGGLVDVPAVLDERSAQRLDAVLAGVDGEDQIAVRSSGVFVRRV
BGC0002349	epemicin PKS3	M8	B1KR	MM	Kutzneria sp. CA-103260	Actinomycetes	WVVVTAADNDWTFGDNTIHVVTDGADRATLAGQLRAAMTEPVAGVVSLLAFDQPITATLHLVQALGDIEADAKVWLVTKGAVAVDENDRIANPEQAQVWGMGRVIALEQPERWGGVVDLPVDADDIAVRRLAGVLAGRDGEDELAIRDRGVRVRRF
BGC0002349	epemicin PKS3	M9	AKR	M	Kutzneria sp. CA-103260	Actinomycetes	WLVVAPKGEYRLVDESAAALTEAGARVEIVRVDLGQADRAGLAAELVGREPAGVLSLLALDEAEFPSHPVLTRGVAGTLLLVQALADAGITAPLWLGTSGAVATGGSDRVVSPAQAQVWGMGRVVGLEFPDRWGGLIDLPATLDDQAARRVCGVLAGVDGEDQVAVRDNGVFLRRL
BGC0002355	tfbM1a	M1	BKR	M	Streptomyces neyagawaensis	Actinomycetes	WLVVVPAGCAEDGLVTGVAGMLSARGVEVRTVVLEAGLGREAVAELLRTAVPEGERAAGVVSLLARGEAGGVVASAVLVQALGDAGVVAPLWCVTRGAVSTGRADRLGGDGVVQAGVWGLGRVAALEYPGRWGGLVDLPQGDGVVEERVLGRLADVLAGLGGEDQVAVRASGVFARRL
BGC0002355	tfbM3b	M10	BKR	M	Streptomyces neyagawaensis	Actinomycetes	WLAVVPEAGASAEVVAGLAGRGAEVREFVLSAGDVDDRAGLAGRLAGAVESVAVSGVVSLLDGSAAVVSTAVLVQALGDAGVVAPLWCVTRGAVSTAVSDPVRDAGLAAVWGLGRVAALEHPERWGGLVDLPEVVDDQVLSRLAGVLTTPSARVSGEDEDQVAVRPSGVFGRRL
BGC0002355	tfbM3c	M11	BKR	M	Streptomyces neyagawaensis	Actinomycetes	WLAVVPEAGASAEVVAGLAGRGAEVREFVLSAGDVDDRAGLAGRLAGAVESVAVSGVVSLLDGSAAVVSTAVLVQALGDAGVVAPLWCVTRGAVSTAVSDPVRDAGLAAVWGLGRVAALEHPERWGGLVDLPEVVDDQVLSRLAGVLTTPSARVSGEDEDQVAVRPSGVFGRRL
BGC0002355	tfbM3d	M12	0DH-BKR	M	Streptomyces neyagawaensis	Actinomycetes	YVVVGALDESEPASTPAGSLRAAGVQAEAFGDLASLEKAVDAGRAPRGRDRAALRFRPGRHPGLHGPGTRPHRAGDGLAGRVTGAVTRVLEAIQSWLASDRFPATRLVVLTRGAVATGADEDVVDLVHSAVWGLVRSAQSENPERIVLVDTDRTDASYAALAAAVVSGEPELALRSGSAFAPRL
BGC0002355	tfbM4	M13	C2KR	MM	Streptomyces neyagawaensis	Actinomycetes	WLLLTTPGGQEPWAKGIARALTDGGAEVRELAVKPADREALAALLREEVAETGSRPTGVLSLLAVDAEQPLHTSLALLQALGDAEVTAPLWCATRGAVSVGGTDRLENPEQALVWGMGRVASMEQGERWGGLVDLPAEPDERSLTRLAATLAAADAGEDQLALRPTGLFVRRL
BGC0002355	tfbM5a	M14	BKR	M	Streptomyces neyagawaensis	Actinomycetes	WLLVTPAGLADDPWVTAAARMLADSGVTVRHCEIDAAADDRTAVAERLRAALTPADDPESPDAAATAGVPDATTPTGVLSLLALDERPHARYEEVPAGLAATTALVQALGDTETEAPLWCLTREAVAVGRADRAASPAQAHVWGLGRSAAQEYPERWGGLVDLPHTPGDRALARLADILGGLGNPADPGGFGAEDQLAVRPQGIFVRRL
BGC0002355	tfbM5b	M15	EDH	M	Streptomyces neyagawaensis	Actinomycetes	WAVLGPDTYAEPAAYPTTDAYPDLDALTAAVEAGAQVPDVVLLTCPADGEPGVPTVDGVRRAAGKALAVARAWLADERFAGSRLVFVTRGAVAAAPGEPVDDPAHAALWGLIRSAQSENPDRFVLLDLDEDEASRRAVPAALECGEPQLAVRRGTVRVLRL
BGC0002355	tfbM5c	M16	EDH	M	Streptomyces neyagawaensis	Actinomycetes	WAVLGGADEAETALGGENLVRHPDLAALAESAVAEGSVPDVVLVPLSSTAAADTAVAARAAARDALRTVQDWLADDRLASAHLVFVTTGAIAARPADDVTDLVHAPVWGLVRAAQSENPGRFTLIDTDGTEASRRALPAALTAGEPQLALRSGEALACRL
BGC0002355	tfbM6a	M17	EDH	M	Streptomyces neyagawaensis	Actinomycetes	WTVLGDDQTLAGLEAAERYADLDALRAALDAGTATVPDAVLMPYLPTEAEAEAEAEAGAEAGPVAAEAVAGATGRALDLLRSWLADDRFADARLVFVTRGAVAAGAGEAVGDLTHAAVHGLVRSAQSEHPDRFLLVDLDGPGTSLPAVLACGEPEIAVRAGTLRAPRL
BGC0002355	tfbM6b	M18	EDH	M	Streptomyces neyagawaensis	Actinomycetes	MVVVGEAFGGEAPVHPDLPSLADAVASGAPAPATVLLPLLPEAGRAGGEDSAQAVREAAVAALSAVQLWLSDERFADSRLVVVTRGAVAAGPGEDVTDLAHAAVWGLLRSAQAEHPGRLVLIDSGDASAPLPPAAFTADEPQLALRGGRLLAPRL
BGC0002355	tfbM6c	M19	EDH	M	Streptomyces neyagawaensis	Actinomycetes	WAVLGGDDLKLGDALALAGEQVAAYADVNELVADQAAPDIVFVPCVPDPGRTEDVAAATRAATGQVLGLVRDWLADDRLDSGPLAATRLAVVTRGAVAVGPDEGVDDLVHSAVWGLVRSAQAEHPGRFLLLDLDGEDGPLHEAAAVLAGATDETQLAVRAGTVHAPRL
BGC0002355	tfbM1b	M2	EDH	M	Streptomyces neyagawaensis	Actinomycetes	WAVLRDCDLAELQATLDAGGAVPSVVVVECAPSSVAGDGGVSADAVRGAVRRVLGVVQGWLADERFADGRLVLVTRGAVEAVPGEGVVDLAGAAVRGLFRSAQSENPGRLVLVDVDADGVVARVGGGLLAVGEPELAVRDGVVRVPRL
BGC0002355	tfbM7a	M20	B2KR	MM	Streptomyces neyagawaensis	Actinomycetes	WLVVAPPDGDEKRLTADVTRVLTARGAAVHVLSPATADRHALTALIREAAGEIAATEDHLAGVLSLLAVDAEQPLHTSLALVQALGDAEVTAPLWCATRGAVSVNSADTLDDPEQALVWGLGRVAALEHGERWGGLVDLPAEPDERSLTRLATALAITGGEDQLALRPTGLFVRRL
BGC0002355	tfbM7b	M21	B1KR	MM	Streptomyces neyagawaensis	Actinomycetes	WLLVVPEAAAEGEWAAAASRMLAERGAAVRTLVLGASHLERKVLADRLREETAAETAGAVAGVLALPATAPHPHALHASLALLQALGDAGVDAPLWCATQGAVSVSGADTVHDPEQALLWGLGRTAALEHPERWGGLVDLPAGSPDERSLTRLAAVLTGAGAGSGAVGGEDQLAIRPTGVHVRRL
BGC0002355	tfbM8a	M22	EDH	M	Streptomyces neyagawaensis	Actinomycetes	WALLSADTAVGTGTGTDTGADTEVDDEAGSGTGLLGALAEALPTAVTYPGLTELGEALAAGAPLPQAVLVPFAASGTPAAPALGTEPLPGEVRAALHRALALVQAWLADDRFADSRLVLVTRGAIATGPGSDVPDLAHAPLWGLLRSAQSEHPDRFVLVDLDDHEASHRALPAALAMTEPQLALREGTVRLPRL
BGC0002355	tfbM8b	M23	ER	M	Streptomyces neyagawaensis	Actinomycetes	VAALGAWNTPSPLPYAAHADLDALRAAIDAGAEAPDWLLVAPGSGPATGEPSATAVREATHEALSLVQAWLEDERFAASRLVFVTRGAVATQSDPDVRDTALAAVWGMVRSAQSENPDRFVLADLDTDSGSYEALPAALTAGEPQFAVRRGTVHAPRL
BGC0002355	tfbM8c	M24	EDH	M	Streptomyces neyagawaensis	Actinomycetes	WVLVDHRELAALDAVPGTIVVDGVCCGGELESVESVHGAVRDALAAVQMWLAEERFAQSRLVVVTRGLAGAAVRGLVRSAQSENPGRLVVLDIDESVSGIEPAWLTLAEQELSVGAGGVRAPRL
BGC0002355	tfbM8d	M25	EDH	M	Streptomyces neyagawaensis	Actinomycetes	WVLVDHRELAALDAVPGTVVLDGLGCGGELESVESVHGAVRDALAAVQMWLAEERFAQSRLVVVTRGLAGAAVRGLVRSAQSENPGRLVVLDVDESVSGIEPAWLTLAEQELSVDADGVRAPRL
BGC0002355	tfbM9a	M26	EDH	M	Streptomyces neyagawaensis	Actinomycetes	WVLVDHRELAALDVVPGTIVVDGVCSGGELESADSVHGAVRDALAAVQMWLAEERFSRSRLVVVTRGLAGAAVRGLVRSAQSENPGRLVVLDVDESVSGIEPAWLTLAEQELSVGADGVRAPRL
BGC0002355	tfbM9b	M27	EDH	M	Streptomyces neyagawaensis	Actinomycetes	WAVVGADHLKLATALEASGVSVDTYADLGALAGVVAAGKPAPELVLVPRGPDAAASVGDVLAGAVRQATHEALSLVQSWLADETFHGTRLAFVTRGAVAAPAGDGTPGDPAQAALWGLLRSAQTENPGRFLLVDIDEHDSSYSALPGAAACGQEQLAVREGTLYAPRL
BGC0002355	tfbM1c	M3	BKR	M	Streptomyces neyagawaensis	Actinomycetes	WLVVVPAGCEEDGLVTGVAGMLSARGVDARVLPLAAALEREDVAALLRTAVPGGEAPTGVLSLLPAARATDAPVASAVLVQALGDAGVVAPLWCVTRGAVSTGRADRLGGDGVVQAGVWGLGRVAALEYPGRWGGLVDLPQGDGVVEERVLGRLADVLAGLGGEDQVAVRASGVFARRL
BGC0002355	tfbM1d	M4	EDH	M	Streptomyces neyagawaensis	Actinomycetes	WPVVRGVEDLNDLGLALDGGASVPSTVVVECAPAASPTPSSPSSLADAVRGAVRRVLGVVQGWLADERFADGRLVLVTRGAVEAVPGEGVVDLAGAAVRGLFRSAQSENPGRLVLVDVDADGVVARVGGGLLAVGEPELAVRDGVVRVPRL
BGC0002355	tfbM1e	M5	BKR	M	Streptomyces neyagawaensis	Actinomycetes	WLVVVPAGREDDDLATAVTRMLSARGVDVRTLSVAPALEREDVAALLRTAVPEGGALTGGLSLLPAVGETNAPVASAVLVQALGDAGVEAPLWCVTRGAVSTGRGDRPRSAAQAGVWGLGRVAALEHPGRWGGLVDLPQTDGTTTHVDERTLDRLADVLAGLGDEDQLAVRDSGVFARRL
BGC0002355	tfbM1f	M6	AKR	M	Streptomyces neyagawaensis	Actinomycetes	WLVVVPATMTEDVRVREVVEALGASGATVRRIALTDGDLGDPTRLADRLREAAMAGEAAQGVLSLLALDEGSHAEYPAVSRGVLFTGELVRALGEADLDAPLWCVTSGAVGTGPSDQPRSAAQAQVWGLGRVVALEHPEWWGGLIDLPETVDARATARLTAVLAGAGAGAGAGAGAGAGAGAEDQLAVRTSGVLARRL
BGC0002355	tfbM2a	M7	0DH-BKR	M	Streptomyces neyagawaensis	Actinomycetes	LAVLGANPVTLHAGSTQPLPSSRRFDDLSALVSATGTGTPVPATVLVPCPSTRSSGPCPQTAEDAHELTRWALALAQGWLADDRFAGSRLVFVTRGAVAVAGGEDVTDVAAAAVWGLVRSAETENPGRFGLIDLDATDPETSHAVPHAALTCAEPELAVRAADTGSTLFAPRL
BGC0002355	tfbM2b	M8	AKR	M	Streptomyces neyagawaensis	Actinomycetes	WLTVVPAALADDPWYGSLRTALERAGADVVTVPVDGAGGAAGIAGVGSPGEAIADDDETEALAERLSQAADTDRAPVAGVLSLLAFDEEPHPRHPAVPVGLALTAALTRAVESAGIGAPLWCLTRGAVSVDATDPLLSPLQAQVAGLTRVTALEQPENWGGSIDLPRTLDERTATRLTAVLAAGGEEDQVAVRPSGTYVRRL
BGC0002355	tfbM3a	M9	EDH	M	Streptomyces neyagawaensis	Actinomycetes	AVLGGSESGTLFPADLLELDGAGGPTARHADLAGLAAAVEAGAPVPDEVFVEVRSPGGLSGADVRDAVVDTLALAQSWLADARFAGSRLVVVTHGAVAVSERDEDVDPALAAVWGLLRSATSENPDRCVLVDCDRDEASWRALPTALATDEPQLALRQGEVRALRL
BGC0002376	bomP6	M1	ZDH	M	Streptomyces sp.	Actinomycetes	TEPDPDARLHICPEPAGPDIAAEVRTALGTTLTAVRDWLADERSATARLTLLTRGAVAATAGEPAALAQAPVWGLVRSAQAEHPGRFLLLDTDGSLGTDELLRLTAGTDEPEIAVREGRLYVPRL
BGC0002376	bomP1	M10	ZDH	M	Streptomyces sp.	Actinomycetes	AVGVAGSGAGVGGVFEVPVLVGVDPVVGVRSVLGGVLEAVQGWLEGDGVGPLVVVTRGAVGVGGGVGVDVCAAPVWGLVRAAEAENPGRFVLVDVDPAGGSFADVAGVVVGSGEPEVAVRGGEVLVPRL
BGC0002376	bomP1	M11	ZDH	M	Streptomyces sp.	Actinomycetes	AVGAAGSGAGVVGGVFEVPVLVGVDPVVGVRSVLGGVLEAVQGWLEGDGVGPLVVVTRGAVGVGGGVGVDVCAAPVWGLVRAAEAENPGRFVLVDVDPAGGSFADVAGVVVGSGEPEVAVRGGEVLVPRL
BGC0002376	bomP6	M2	EDH	M	Streptomyces sp.	Actinomycetes	QRADTADSGHTAAYTVLHCPAAPDGQDVPDAVRALTRHVLGAVRDRLADPEAGTAPLVVVTRRAVSVRPGEDVDPVQAPVWGLVRAAQAENPGRFHLLDIEDESAATEAALAAAVASGEPESALRGGESWVPRL
BGC0002376	bomP6	M3	ZDH	M	Streptomyces sp.	Actinomycetes	WAVLGDAAAAGPGTTAYSDLAALGAALTDGASVPDVVLLPVPHATEHDDVPTAVRSVTGQVLDTLQSWLADERYARSRLMVVTRNALPLSDEESDTAVDLVQAPVWGLLRAAQEEYPGRFVLVDTDGSAAAGGSLPAVAASGEPEAILRGAEVRVPRL
BGC0002376	bomP5	M4	ZDH	M	Streptomyces sp.	Actinomycetes	AVGAAGSGAGVGGVFEVPVLVGVDPVVGVRSVLGGVLEAVQGWLEGDGVGPLVVVTRGAVGVGVGVGVDVCAAPVWGLVRAAEAENPGRFVLVDVDPAGGSFADVAGVVVGSGEPEVAVRGGEVLVPRL
BGC0002376	bomP4	M5	EDH	M	Streptomyces sp.	Actinomycetes	EVVAVPWDQRNAGPVSETAVLVWECPPPVGDPVSAAHELTARALGVVQEWLTDERFAAGRLLVVTRGAVALPGETLTHPAAAAVAGLVRSAQSENPGRILLTDTDGDSDSVAPQGVAAVVASGEPESALREGAVWAPRL
BGC0002376	bomP4	M6	0DH-CKR	M	Streptomyces sp.	Actinomycetes	TAVLAAAGPLDDPRTGLPFPVFDPSDPLDADAPDFVLLPLAAPAGDEPDAVRGHAAEVLAHLREFLSHVPDGGTTRLAVVTRHAVAAGDEAPDVRHAAVWGLVRAAQSEHPGRFVLADVDGLDASATALPDALATGADELAVRGGTVLLPKL
BGC0002376	bomP3	M7	AKR	M	Streptomyces sp.	Actinomycetes	WLVAVAEGQTDTPEVTAILAALAERGASPHVIEAVPGLGRADLSARLATRPAAGILSLLALDDRPEPAHPHLTRGLTATVTLVQALSDTPDAPRLWCATRSAVATSRSAELTAPEQAQLWGLGGGLALDHPDTWGGTVDLPAELAPADLHRLCDVLSGATGEDAVALRTDGMLARRL
BGC0002376	bomP2	M8	ZDH	MM	Streptomyces sp.	Actinomycetes	GVSVGRWNDVTGTSDVVPDVVVYESLRARGAGDGTAAGVRAAVCEALEVVQAWLADERFDESRLVVRTMGAVALPGTGPVDMAGAAVWGLVRSAQSENPGRVVLLDSDSDEVTDLAARVTAMGESQVAVHANRAHVGRL
BGC0002376	bomP2	M9	EDH	M	Streptomyces sp.	Actinomycetes	EAAELTVGRWSDVAGSSGVVPDVVIFDSLRGGEAGAGSAGVVRAAVSEVLGVVQEWLGDERFGRSRLVVRTVGAVALPGTGPVDMAGAAVWGLVRSAQSENPGRVVLLDGELDTLAEVSRVAALGESQVVVREGRAHVGRL
BGC0002431	madA7	M10	A1KR	MM	Actinomadura sp.	Actinomycetes	WLVITPADEDGGSPAVHTAVQAIRGHGGDVRLLPVDTAGATRERFVRDLAEASAETPPAGVLSLLALDASPHPDEPAVPAGLAATIALIQAHGDGGAGAPLWCLTQGAVAVSPTDPLPSPRQAQVWGLGRVAALEYPSRWGGLIDLPAAPDRNTAARLAGLLASGGPEDQVAVRTTASFARRM
BGC0002431	madA7	M11	A1KR	MM	Actinomadura sp.	Actinomycetes	WLVLVPADGGAGAAERSAIDTAVQAIRSHGATASVLPVDCAAVERDQLVQHLTEAETPPSGILSLLALDETPHPSHPAVPAGLAATTALVQALDASGIAVRLWCVTQGAVAVSPSDPLLNPVQAETWGLGRVAALEYPARWGGLIDLPTTPDQHTPARLAALLTPGQPEDQVAVRATATLARRM
BGC0002431	madA7	M12	AKR	M	Actinomadura sp.	Actinomycetes	WLVLVPANDAEGPAADLAVQALRAHGAVPNVLRVEATTAGREEFARQLADADADAPLEGVLSLLALDETPHPSHPAVPAGLAATTALVQALDDSGVPARLWCLTQGAVSVSPSDPLLNPLQAETWGLGRVAALEYPARWGGLIDLPTTPDQHTPARLAALLAPGQPEDQAAIRATAVLARRM
BGC0002431	madA8	M13	0DH-B2KR	MM	Actinomadura sp.	Actinomycetes	LAVVALDAASGSDAELADALGGALPGTERHPDLSALLTAAVDGTPLPDTVLAVCTASGAAGPVEERLHAVTSGVLALLQEWPSDESTSRLVVVTRGAVATGPGDGVDDLPAAAVWGLVRSAQSENPGRIVLLDLDGPDASSHAVPAALASGEPQIALRDGRAYAPRL
BGC0002431	madA9	M14	0DH-CKR	M	Actinomadura sp.	Actinomycetes	SGRYIELDALRTALDADPGAPAPPVVLTRAPTASGGDARRAAEAASTLVRDWLAEPRLSGSRLVVVTRGAVSVDGGERDVPSLADAAVWGVVHSAQAERPDRFVLLDTDSDPEEARLREAVAAALAQHEPQVAIRSAQVLVPRL
BGC0002431	madA2	M2	ER	MM	Actinomadura sp.	Actinomycetes	HVTLAPTASAEDGASYAGLDGLAAALDGGLPAPSVVLAEVGAVADALALVQRWLAEPRLSEARLAVVTRGAVACENPVPDGAGVWGLVRSAQAENPGRFVLLDVGAEADAGADAGSRAEQAEAVRRAVRAGEPQVAWRDGRLLVPRW
BGC0002431	madA3	M3	EDH	M	Actinomadura sp.	Actinomycetes	IAAAGPDATGPAADGLSADGLGVVAPDAVHPDLAALKTALADGRPTPAVVLLPLPTGGPDAAEPVARAHDAARRGLELLQEWLEEERFAAARLIAVTRGAVAATGDDPPSDLAGAPLWGLVRAAQAEYPDRIVLLDLDGEDASRDVLRGAVAAAMENGESQLAVRSGDVLVPRL
BGC0002431	madA3	M4	ER	M	Actinomadura sp.	Actinomycetes	WAALGPDTLPPGLDAYRDLPTLLMALDAGQPPPSHVLTTIPPEPPPGRTETDVAADTLLLLQAWLDEPRLADARLVVVTRGAVASDVPDLAGAGVWGLVRSAQAENPGRFVLLDLETAPDGDVLELVRRALHTDEPQLAVRGGQALVPRL
BGC0002431	madA4	M5	EDH	MM	Actinomadura sp.	Actinomycetes	LCGLGDFDDSVLPSVPDVDALLARLDTEDLPTPLTVLTVLPPEGEGGGLDLTGRVLALLQRWLNEPRLDDVRLALVTQGAVAVENPDVAGAAVWGLVRSAQSEEPGRFVLVDAGLPDPGAAFAQDAADAVRRAVEANEPQAAVRAGQLLAPRL
BGC0002431	madA4	M6	ER	M	Actinomadura sp.	Actinomycetes	WAVLGTDAFGPADCARFPDLAALSAALDADRPSPTLVLADASYGESDDLDAVGNVLSLLQAWLDEPRLADARLVVVTRGAVASDVPDLAGAGVWGLVRSAQAENPGRFVLLDLEADTFLSTGLADAVARAAEAREPQLAVRSGELLIPRL
BGC0002431	madA5	M7	EDH	MM	Actinomadura sp.	Actinomycetes	WAVVGAEPVATDLVHHPDLDGLVAALDGGAPVPPVVLAAVPSSPDALDMVTDTLALVQAWLAEPRLADARLALVTRGAVAAGTEPDLGGAAVWGLVRSAQTENPDRFVLVDVDDLDDADADASANVDRDAACGVAEAVRRAVEADEPQVAVRGGRLLVPRL
BGC0002431	madA5	M8	ER	M	Actinomadura sp.	Actinomycetes	WAFLGSEHMRPQQNGETRPEWLWHDDLAALVTAIEAGAPVPPVVFAEVSAGAGDGGNSGENAAARGLATARRTLALLQDWLAEPHLADARLVLVTRGAVTTGELDGPAAGGDAEAPIALSDAGVWGLVRTAQSENPDRFVLLDLDSGTADATGDGAVRAVWAAIAADEPQLALRSGRAFVPRL
BGC0002431	madA6	M9	CKR	M	Actinomadura sp.	Actinomycetes	WLVVAAGGADGWADACGRALGEEAHRLDVDGAVDREGLAEWLRSRYADGAPPAGVLSLLALRDGPETGAGGAAGTLALLQAMVDTGIGAPLWCATRGAVSVGDSDLLESPAQARVWGLGRVAALEHPDLWGGLVDLPPGPDGLDAARLRAVLTGTAGEDQVALRANGAFGCRV
BGC0002446	ionA1	M1	ZDH	M	Streptomyces sp.	Actinomycetes	WALLGDADPHGLGLPRYASIAELAAAPEPPAAVLLPVRGAELADGAAESAHETVISTWRTVQEWLAEERLAESRLVIATEGAIAVGDEDVTDLAAAGVWGLIRSAEVENPGRFALIDSDPRSDAPAAQLAASLGAGEWQLAVRGDEVLAPRL
BGC0002446	ionA4	M10	ER	MM	Streptomyces sp.	Actinomycetes	WAALGDDDQVVEAPRYAELANLTEALDGGATAPEVVLHTPPAVTPADGLADSALRRTTELLDLVRSWLADERLADSRLVVVTRGAVPAGNGAEADLAGAPLWGLIRSAQSENPDRFLLLDLDSAPTADGVPVAAAIQAALDSGETQLALRGAEVLTPRL
BGC0002446	ionA5	M11	CKR	M	Streptomyces sp.	Actinomycetes	WLLVTPEDPATPDLADGVRAALEAAGADVLTLPVPLTETSGKLLADRLPELLAPETAPAGVLSLLGCDPTATETDEDGLSAATTATVALLQALTEAGAETPVWCATRSAVAAAPRDPAPDAGGSALWGLGRVAALELPDLWGGLVDLPESLDERTGWLLTTTLAGVDGEDQLAIRPSGLLARRL
BGC0002446	ionA6	M13	ER	MM	Streptomyces sp.	Actinomycetes	WAMLGNEDPFAVGAALQGAGLGVDAYPSVEGLCAVLDSGVPAPAVAFTSVSADEGVGLAEAARGATVELLSVVQEWLDQDGLADTRLVVVTRGAMGVGDDDVVDPAAAPLWGLIRSAQSENPGRFLLLDLDPVDEASVDFIAGAVSAALEAGEWQLAIRGEEVLVPRL
BGC0002446	ionA6	M14	ER	MM	Streptomyces sp.	Actinomycetes	WAMLGSEDPFAVGAGLQGAGLAVDAYPTVEGLRAVLEAGVPAPAVAFTSVSADEGVGLAEAARGATVELLSVVQEWLDQDGLADTRLVVVTRGAMGVGDDDVVDPAAAPLWGLIRSAQAENPGRFLLLDLDPVDEASVDFIAGAVSAALEAGEWQLAIRGEEVLVPRL
BGC0002446	ionA7	M15	ER	MM	Streptomyces sp.	Actinomycetes	WAVVGDDPYGLSSAVQTAGLSADAYPAVSGVREVMEWGVPAPQVALLAVPTATDAGDRGLARASEAAAAHLLDAVQEWLATDGLADSRLVVVTRGAVSVQGEDVADLAAAPLWGLIRSAQSENPGRFLLVDLDPEEEPGGAGADLLPAALTLALDSGEGQVAVRGAEVYLSRL
BGC0002446	ionA1	M2	ER	M	Streptomyces sp.	Actinomycetes	WTVLGALNAGTEARYYADLGELLGALDGEGPVPGTVLVASPEGAKEGDLSAAAGSVTIGVLDLLRRWLAEDRLADTRLVVVTQGAVSTDGGDVADLTSSAVWGLVRSAQSENPDRFLLVDLDPALNGQDTDREDALALALAVGESQVAVREGRVWLPRL
BGC0002446	ionA1	M3	ZDH	MM	Streptomyces sp.	Actinomycetes	GVLWGAEDRLGLGLPAYADLDEMVRSEGGVPANVLCVPAAVRAADLAAAVEETAGDVLRTVQRWLADERTVNSRLVLVTSGAVAVGETSVADLAASGVWGLIRSAETENPGRFALIDADPAGGADAVAHALSLVGTGEWQVALRDGEVLAPRL
BGC0002446	ionA1	M4	ER	M	Streptomyces sp.	Actinomycetes	WTVLGSDEALGATGPRYADLAALRAALEDGAEVPSLVLCAPEGAKEGGLADAAESVTAGVLELVQGWLADERLAQSRLVVVTRGAVATDGGDVSDLAGSALWGLVRTAQSEAPDRFVLLDTGSAGATAEELALALATGEPQVAVRGGRVWLPRL
BGC0002446	ionA1	M5	AKR	M	Streptomyces sp.	Actinomycetes	WLAVLPGDAAEHGLTGVLDALRDLGAEVTELPLTEGDLARGAEHVTGLLRDAAGAGTVTGVLSFLAGAHNLAATLTLMRAHATAGLDAPLWCATRGAVAVTPEERITDPALAQVWGLGRVFGLEHAPLWGGLVDLPAELDERVAAGCAAVLANTDGENECAVRPSGTFLRRL
BGC0002446	ionA1	M6	A2KR	MM	Streptomyces sp.	Actinomycetes	WLMVVSEGFEGGWFEALSGLVAECGGDVVPVEVPLDGVDRECVARLLTEAAGETPVAGVLSLLAFADDTWVTGLPVTQGVSGTLALVQAMEDLAWPTRLWCVTRGAVSTGQGDVVSHPAQAEVWGMGRVAALELPQQWGGMVDVPVEVDDRVLRRIAEVLGQRDGVLEDQVAVRSGGVFARRM
BGC0002446	ionA2	M7	A2KR	MM	Streptomyces sp.	Actinomycetes	WLMVVSEGFEGGWFEALSGLVAECGGDVVPVEVPLDGVDRECVARLLTEAAGETPVAGVLSLLAFADDTWVTGLPVTQGVAGTLALVQAVEDLAWPTRLWCVTRGAVATGLGDVVTSAVQAEVWGMGRVAALELPQQWGGMVDVPVEVDDRALRRVAEVLGQRGGLLEDQVAVRSGGVFARRM
BGC0002446	ionA3	M8	EDH	M	Streptomyces sp.	Actinomycetes	WALLGADPMGLAAGLQYAGMAVSTYDDLAAFTAVLDGGVPAPEVVLVSCVSPGPASGGALPDAEAAHAATRDALALAQAWLADERLSTSRLVFVTRNAVAVTEGEDVADLAHAPVWGLVRTAQTENPERFLIIDVDSDDMLDGETLVEGVSMALAEGSPQAAIRADEVYTPSI
BGC0002446	ionA4	M9	ER	MM	Streptomyces sp.	Actinomycetes	WAIVGDDVLGVGGAIGGVGIALGSFPELTALRASVDAGVPAPPLVVTTPSPGQLAPGDGLSRAAERTASELLGLVQEWLADDALADSRLVVVTRGAVATRTGEDVTDLTAAAVWGLVRTAQQEAPGRFLLVDLCPVEDAADDLADAVATALAADESQIAVRGGELLVPRL
BGC0002452	lcmA1	M1	BKR	M	Streptomyces kitasatoensis	Actinomycetes	WLLLAPDDPADAPLTAAVARELAARGAGVHALGLPAGADRDTVARLLREAGDAAARCGRVLWQAPAEPDLADAVALLQALGEAGPDAAPLWIATRGAAAVRPGESPSPAGARLWGLGQVAAVELGPRWGGLVDLPAEPTPAALRALGAAALADTADARTPEDQIAVRDSGVHVRRV
BGC0002452	lcmA1	M2	EDH	M	Streptomyces kitasatoensis	Actinomycetes	RAVVGSATDGIAAALRPPAGAGPASYAHLAALREALDGGAPVPDVVVLTPFDTGSEPDPVRAHLRRGLSLVQEWAGDERLAGARLVVLTRNAVEAGDADVPGLAGAALWGLLRSAQAEYPDRFTLLDLDGSPATRAALPMALASDEPQLALRTGALLAPAL
BGC0002452	lcmA2	M3	EDH	M	Streptomyces kitasatoensis	Actinomycetes	WAVTGPVDAATLTGLRAAGVDVRVLPGPGGTDEPAGPPAEAVVLDLTAAASGAPSPDLVDRVRTVVRRVLRAVQSPPPAGPGGTPPRLVVLTRGAAGPAGPAADPAGAAAWGLVRTAQTEQPGRFVLVDVDDRQESLRALPGLLATGATQLAVRAGRATVPRL
BGC0002452	lcmA3	M4	B2KR	MM	Streptomyces kitasatoensis	Actinomycetes	RLLVVPAGDAHTAVADAVEEAVASFGGTVRRVTVDAARVTHDDLRALLEPAVNGDTAVTGAVSLLGLCADAHPGHPAVSTGVAATLALVQALAALGGTAPLWTVTRGAVATAPDEVPSTAGAQLWGLGRVAALELPERWGGLVDLPERPDARVYDRLAGVLAEPGTEDQIAIRTSGVFGRRV
BGC0002452	lcmA3	M5	ER	MA3	Streptomyces kitasatoensis	Actinomycetes	WILAGPDALGLADTADAHLPGLLTTPGEPAPEPTDGPASDAVVSGAPAGVGESAGVAAWDARAFADGPASDAVVSGVPAGTGESAGVAMGDAQALADGPVPDVVVSGVPAGVGEPAGVTVGDAQALADGPALDVVVSGVPAGVGESAGVAVWDAQALADGPVPDVVVSGVPAGVGESAGVATWDSRALTDGSASDAVVSGVPAGAGESSGVAAWDAQALADGPVPDAVVFGVPAGTGGATGDPGRDAQALADSVHTAVRTALEAVQRWLRTASVPERTRLVVATRGAVAVRGDGDVTDPAAAAVWGLLRSAQAEEPGRFLLVDLDDDPASARALPAALAAGEPQTAVRAGTVHVPRL
BGC0002452	lcmA4	M6	A1KR	MA21	Streptomyces kitasatoensis	Actinomycetes	WLLLATPATEPGAADAAATALGSAGATVLRWTLDPAREDRAGLATRLGGLSADAAGLTGVLLLPGAAAGDRALDEGTAAALLLVQAVTDAAPEARVWVATRGAVAAGPGESPSPTAARLWGLGRVAALEEPTRWGGLVDLPAEPADRDWARLAGVLSGATGEDQIALRASGAYGCRM
BGC0002452	lcmA5	M7	AKR	M	Streptomyces kitasatoensis	Actinomycetes	WLMVEHGHRTDSGDAAERTLRASGADVLREVLDVGEWDRAGLAARLAALAAEPAGLAGVLVLPGSGEAPPAGRPGLDDGTAGVLLMVQALADSAVPARMWVVTRGAVAVRPGEVPDGPGARVWGLGRVAALEASACWGGLVDLPAAPADRDWKRLAGVLSGGSGEDQVAIRPSGAYGRRM
BGC0002453	asmC1	M3	C2KR	MM	Streptomyces seoulensis	Actinomycetes	WLVVVPPDTADDDRRIARIVRTLDGAGMRTRIVEFAETDGTGYVDAVRRAMAQEELTGVVSLLALDPRERPGSPVLTEGTAATLALIRAHGEAAAGPRLWCVTSGAVSIGPTDRLRTPEQAAVWGLGHAAALEHPDRWGGLVDLPEVIDARTGPALLGVLNGTSGEDQVAVRSAGVFGRRL
BGC0002453	asmC2	M4	EDH	M	Streptomyces seoulensis	Actinomycetes	GFVSVGSVGDVRALVGGVGVPEVLVLEVVGGGRVDASGVRELTGWVLEVVQAWLGEPELGGSRLLVVTRGAVGVGGEAPVDLAGAAVGGLLRSVQVENPGRVVLVDVDVDGGVVSGELLAAVAGLDEPQVAVRGGVCFARRL
BGC0002453	asmC3	M5	0DH-B2KR	MM	Streptomyces seoulensis	Actinomycetes	FVSVGSVGDVRALVGGVGVPEVLVLEVVGGGRVDASGVRELTGWVLEVVQAWLGEPELGGSRLLVVTRGAVGVGGEAPVDLAGAAVGGLLRSVQVENPGRVVLVDVDVDGGVVSGELLAAVAGLDEPQVAVRGGVCFARRL
BGC0002454	venG	M10	0DH-B1KR	MM	Streptomyces sp. NRRL S-4	Actinomycetes	ILWDDTRSAEEIEAAVADGVRLVLLDAAAFDAHGRRESDGEHLPERVREAVTATLARAKQWLADEALADARLAVVTHGAVAVSGTGPVDLTQAAVRGFLRSVQSEHPGRFVLVDSDGGAVGVPVSVLAAAVAEGEPEFALRGGDVYVPRL
BGC0002454	venK	M2	B2KR	MM	Streptomyces sp. NRRL S-4	Actinomycetes	WLVAVTPGQLDGALYETVAGALRAQGAVVEPLVVSGADDAGQGERPWAEALAAPSAASGVLSLLAQDESPLTDASATPAGYAQNLALLQQLEAADSDAALWCVTQGAVSIGERDPLTSPAQALVWGLGRVAAQELPTRWGGLVDLPREPDERALARLCEVLAAEAGEDQVAVRSTAAYGRRL
BGC0002454	venJ	M3	ER	MM	Streptomyces sp. NRRL S-4	Actinomycetes	TAVIGEGLPGLDLPRHADLAALAASVRGGAAVPHTVLLPCPPWPRTYADGTAAATADDASAAQAGGVPALTRELLASVLGTVQEWLALPELEEARLAVVTRGGSAVAPGERPEPGQAAVQGLVRTAQSEHPDRFMLVDLDDAPSSAAALPAAVAGAVVTGETSLAVRSGAVSVPRL
BGC0002454	venJ	M4	B2KR	MM	Streptomyces sp. NRRL S-4	Actinomycetes	WLLVVPEKRADDPAVRDIGAGIERRGGTVRQVLLPAERAEHAATTGELPYVEEISVRVRAVPGHERAAGVLALTGRDEDSHPAHPGVPLGFSRTLGLIQALAATAVTAPMWCVTSGAVTTGSGAELTGPRQAMVWGLGRVAAQEYPDRWGGLIDLPTEPGERDIDRLCALLTGETGEDQLAVRPSGVRARRL
BGC0002454	venI	M5	ER	MM	Streptomyces sp. NRRL S-4	Actinomycetes	AVVLGDGLAELGLPCHEDLAALVESVRGGGALPSTVLLPCPRTTGGDTPAAVRAQLASVLAAVQEWLGLPELEEARLAVVTRAGAVVTPGERPEPGQAAVQGLIRTASSEHPGRFLMIDLDDAPSSAAALPAAVAGAVAADESALALRSGAVFVPRL
BGC0002454	venI	M6	EDH	M	Streptomyces sp. NRRL S-4	Actinomycetes	WAVIGDEAAALTRGADADSEVYGNLADLAAAIDAGTAVPKTVVVACPDSLADVPEATKAATFWALETAQAWLDDDRLAEARLVLLTRNAATLAAAATDGQGADPAHAAARGLLRSAQSEHPGRIVQFDLPADPSDGTAALLAPALRTALAADEPELVLRNSTLWVPRL
BGC0002454	venI	M7	AKR	M	Streptomyces sp. NRRL S-4	Actinomycetes	WLKITAGGTAAAECVATLERQGLDVVTVDVSADLEGATDPDALAERLRAVVADTPVRGVLSLLALAEGPGDAWPLTATHALVRALGEADVPAPLWCVTQGAVAVAAEETRPGQAQVWGLGRVAALEHPERWGGLIDLPEEFGARDTARLGAVLAGTTGEDQVALRVGGLLARR
BGC0002454	venH	M8	ER	M	Streptomyces sp. NRRL S-4	Actinomycetes	AVLGGAGDLAGSAEGAVRFADLAALQEAVRTGDELPGVVLLPVPAGGDDTVAATREVTGAVLDALQAWLAAEETGTATLAVVTRGGAAALPGDSTDPVHSAVRGLVRSACSENPGRIVQIDLDSDARSAAALPAAVTAAVAAGETESVVRAGAPLTPRL
BGC0002454	venG	M9	EDH	MM	Streptomyces sp. NRRL S-4	Actinomycetes	WHPGTPLAEVIADDPELVLLDCTAQDLPGGDDVPAAAHALAGVVLARVQEWLAPETPTRARLAVLTRGAVGIASEDLPDPVQAAVRGLLRSVQSEHPGRFVLVDSDGGAVGVPVSVLAAAVAEGEPEFALRGGNVYVPRL
BGC0002456	avmA	M1	EDH	MM	Streptomyces sp. NBRC 109436	Actinomycetes	SPYAVPDGSGLPAAAHTPSVVTVALTGSGQGGPRAVHELAERALTLVRQWLVDEERPAASRLVVVTRRAVGARAEEEIADLAGAAVWGLIRSAQSEHPGRLVLIDVDGTEESASALAAAVASGEPQLALRSGAAYVPRL
BGC0002456	avmE	M10	ER	MM	Streptomyces sp. NBRC 109436	Actinomycetes	LTVGFPERADENFSSLSALSDAISAGTAATPDVVLARCDGGSPYDATSRALALLQTWLADPNFAASRLVLVTRGGVTVDERRSVDDLGAAAVWGLVRSAQSETPDRFHLVDVEVDAEGVGAESVGADRAAHAGMDQNADAALNADAGVDAALNADAGAVAALNADAGVGAALNADAGVAVDRAANPDAAMNADHAPGLWPALSAALATGEPQLALRAGKVWAPRL
BGC0002456	avmE	M11	ER	MM	Streptomyces sp. NBRC 109436	Actinomycetes	LDAAGAGSALALPTHPDLMALADAIGSGAGCPEVVVAPFSTESDGTPAAIHEAVARALSMVRAWLAEERFGSSRLLIVTRGAVATGAHEDVEDLAAAAVWGLVRSAQSENPGRFVLADIDGGASSWPALAAAVRTGAEEPQLVVRAGEVAVPRL
BGC0002456	avmF	M12	EDH	MM	Streptomyces sp. NBRC 109436	Actinomycetes	AGVAGVAGVAGDAAGDAVAGGTAAGKTAGRGTAAGATAAGGATAGDPAAALDIRMWDDAVASAGPPPDVVVVHALAPGTDDLAAAAHTVTGQVLEALRSWLSDERCAGTRLAVVTSGAVAVSEEETADPAGAAVWGLVRSAQSEHPGRIVLADVTGRDGVTDRDDAHGRDGAHDRDDAHRRDGAHGALGAGLPSVLAAVLASGEPQTAVRGDTLLVPRL
BGC0002456	avmF	M13	CKR	M	Streptomyces sp. NBRC 109436	Actinomycetes	WLVVVPGHRGTNTAPDGSTAPDGGATPDGDVTPDGSTALDGDVTPNGDVTPDRDATPDGDDVVRRVSQGLERHGARVRLVTADGESLTESLKAASADAVRGMVALPRAGAWAVELVRAVDELGLEAPLWWLTRGAVGVAPSEPAPSAPAALLWGLGRVAALEHPGWWGGLVDLPERLDARALTRLCRVLTGSTGEDQVAIRSAGALGRRL
BGC0002456	avmC	M4	A1KR	MM	Streptomyces sp. NBRC 109436	Actinomycetes	WLLAVPEAHADDPLVGAVSSALAESGAQVVPLAVCCADVDRAALEGAVADAVDQRSAPLSGVLSLLALDEAPHPGHPAVPRGLAATLALVQALDGRRAPLWLATRGAVVAQRSDRMLSPVQAQVWGLGRVAGLEHPERWGGLLDLPAEPLDAGARQRLADVLAAPGDEDQIAVRPSGTYVRRM
BGC0002456	avmC	M5	ER	M	Streptomyces sp. NBRC 109436	Actinomycetes	LATVGDLFFEVPGSEAYPDIPGFDAALASGATAPDAVLTTPPPAEGEPAEQVRTATAWALATLRAWLADEERATSTLAIVTREGMAGAAVQGLVRSAQSEHPGRFALVEVDGSEESWGAIPKAVASGEPQLAIRLGEVAVPRL
BGC0002456	avmD	M6	ER	M	Streptomyces sp. NBRC 109436	Actinomycetes	CAAIGPVPLAPENCVRYADAPALAAALDAGAQAPAAVLVACGDGDPCGAAAGGDGVRDAVTEALSLVRRWLGDDRLASSRLVFLSRGAVAASPGERVADLAAAAVWGLVRSAQSEHPDRFVLLDTDADPASRDALRTAVGAGLPAGLPQLALRHGELLTPAL
BGC0002456	avmD	M7	EDH	MM	Streptomyces sp. NBRC 109436	Actinomycetes	VTWACLGDAALAAALGARFHDDLETLAQAQAQPQADADAVDSSAAPTVVVAAPAPGPDDDPLSAVRTVTHQALALVQAWLADERYADARLVFLTRGAVSVPGDAGVKDLAAASLWGLIRSAQSEHPGRFVLVDAADAADAADAADAMDADEGDKSDESDASWAVVRAAVASGESQSAVRAGKVLVPRL
BGC0002456	avmD	M8	EDH	M	Streptomyces sp. NBRC 109436	Actinomycetes	WSVLAGDDPVRALADLAETVTETGPESGTAAESGTVAESGATVTGVPVPDVVVYQLPAGAGDLPAVRTATEGALALVQSWLADDRFADARLVFVTSGAIRTDEDGEEAGDLAAAAVHGLIRSAQSEHPGRFVLVDRDGRDTDTDRDTDTGVDADLLRRAVGTGEPQVALRAGGTLVPRL
BGC0002456	avmD	M9	EDH	M	Streptomyces sp. NBRC 109436	Actinomycetes	WGVLGADDLGLGEALTDAAVSVRTFPGLGALAAASAQAPAPDVVVASCVSPADPSGPPPPVAVAADTVRDTAHGALRLLRDWLAEERWAGTRLVLVTRGAVAARPGDGVADLAASALWGLVRTAQTEHPDRFTLLDLDDAHTSRRALPQLLMSLVAAGEPQAAVRGGVAFVPRL
BGC0002517	triA1	M1	EDH	M	Streptomyces sp.	Actinomycetes	TAVLTDSVDALLDGPAPDAVVHRVPGPADADATTARAHVHHVLRLLRTWQEDERLAGTRLVVVTPPGSPAHAAVRGLVRSAQAENPGRYVLVEHEHLPGEADLRRVLATGEPELSLADGGFDVPRL
BGC0002517	triA1	M2	EDH	M	Streptomyces sp.	Actinomycetes	WAVLGDDDLGLGVPVHTGLDALGASVPDVVILPVAAPRADGERLPGAVRTVLGRTLGTLRAWTADDRYSGSVLVVLTGGGLADAAVHGLVRAAQAEDPGRILLVARTGQGGPVPDRAALAALLDSGEPEVRWRDGHAHAPRL
BGC0002517	triA2	M3	EDH	MM	Streptomyces sp.	Actinomycetes	FAVLDEQGPAALDTVPAWVVLPAGDADPLTGARRATERVLTAVQDWLADERTASARLLVLTRGAVAVGEEDVTDLAGAAVWGLVRAAQGEHPGRFVLVDGADADAAVAVAAATAEPQLALRDGTVHVPRL
BGC0002517	triA2	M4	EDH	M	Streptomyces sp.	Actinomycetes	PSLTRTDSAPEPRTLTVPTEGDPGDDLPALARRTAVRALAALRRDLADVPDGAPLVVVTRSAVAVHADAVPDPAQAVLWGMVRAAAVEHPGRFVLVDTDDDPASAAVLPAAVATGAPELALRAGTVYVPEL
BGC0002517	triA5	M7	EDH	M	Streptomyces sp.	Actinomycetes	APDTAHRVLHSTPGSDAGAVREALRVALAALQDDDPRPLAVVTRGAVGVAGEDVPDLAGAAVWGLVRSAQSENPDRFVLLDLEPGADADAVLPAVLASGEPQIAVRAGTAHAARL
BGC0002517	triA5	M8	EDH	MM	Streptomyces sp.	Actinomycetes	EVVRAPAGTSAAEARAAVDTVLDRLRTALATTDTTLVVVTGTDPAGAAAGGLVRSAQSENPGRIVLVEAEAGDEPDAGRLAEAVATGEPHLAYRDGTWQVPRL
BGC0002517	triA5	M9	EDH	M	Streptomyces sp.	Actinomycetes	WTVLGPGHRELAGALAGEVAEVAVADDLAEAAGQAPDTLVVVHTGGDGPDAARAGVRRLLTLVQDWLADARFADTTLVLATRGATGPGDVTDPGAATAWGLIRSAQTEHPDRMVLADLDDTDASRRLLPSAVASGEPQLALRDGGLSVPRL
BGC0002526	K41A pak4	M1	C2KR	MM	Streptomyces sp.	Actinomycetes	WRHGPDLLAEVLLPEARSAGDGGFGIHPLLLDAALQPAVLDGIGAQEGEGQLWTPFAWSGVSLWASGATAVRVRLTPLAPDTGDGRRELRVEVVDAVGDPVLTAESVVLRPVDAEAVRTAGRRAGGARLRAAVWTPLALTGHEAFADAPGTATTGQWPVLSGHGHTGGDGAVAEALEGGSSVVLADVYTGFSSRLAEAEAAAGLVREWLAEPRAADATLVLLTRGAVDIGVPEVGGATPDAVRDGVWGRLRHVQARHPGRFVLLDLDPAPAPQTDGEPVGSAGAPPAVVDAAVARGEPQLAVRGGRVLVPRW
BGC0002526	K41A pak30	M10	AKR	M	Streptomyces sp.	Actinomycetes	WLVFVPTGSEEDPAVRMSVQALRKHGAEPRVHQVDVATADRAVLAAQVAELTSARTEATGTTEAATEATEATGDDSPAGVLCLLPSDGGAFLPEHPAVPAGLAATTALFQALGDAGVEAPMWCVTQGAVSVSPDEPLPHPAQAPVWGLGRVAALEHPQRWGGLVDLPTELDARAADRLAALLAEDRAEEPSEDQVALRGSGSYVRRL
BGC0002526	K41A pak30	M11	AKR	M	Streptomyces sp.	Actinomycetes	WWVFTSAAQEEAARTAVRALGEYGAEARVCEVDVAAADRDLLVDKAATLAAGDAPAGVLCLFGLDRSRLPGHPELSAGLAAATALVQALGDAGIEAPLWCLTQGAVSALPGEPLPHPDQAQLWGLGRVAALEHPERWGGLVDLPVAVDDRTHTRLAGVLTRGQPEDQVAIRSCGILARRL
BGC0002526	K41A pak30	M12	A1KR	MM	Streptomyces sp.	Actinomycetes	WLLLVPAGFDAHPAARAVGEALRRGGAAAEAWSVDTRTGACREELAERLSEAAGSRPPDRILSLLALDEDPHPEHPEVPAGLAATTALVQALGDIEVEAAVWCVTQGAVAVSADDPLPHPVQAQAWGLGRVAALEEPQRWGGLVDLPAEADEDVLDRLAALFAEGTGEDQLAIRPTGTHCRRL
BGC0002526	K41A pak29	M13	0ER-0DH-B2KR	MM	Streptomyces sp.	Actinomycetes	PALLVADPADPSAAALRAALPGAACYPDLSALRAAVAAGEPEPDTVLAPLGPSPAGHDPVGRLYPSGREALSLLQEWLAGPESAARLVLVTRGAVDVGGREGVGDLPGAALWGLVRGAQSEHPDRFVLLDIDEADTSSAAVPGAASPDVDEPQLALRGGRLFVPRL
BGC0002526	K41A pak5	M2	ER	MM	Streptomyces sp.	Actinomycetes	WVVLGEAGDHPDLAGLVRALDEGAPVPPVVAAEVKPGEGDEEPVTVARMLEMIQDWLAEERCADSRLLLVTRGAVAVADGMEAPDPVGAALWGLARSAQAENPGRIVLLDIDPADPVTEPDPDSEPEPVGVAALRALRPILATDEPQLAVRDGQVFVPRL
BGC0002526	K41A pak6	M3	EDH	M	Streptomyces sp.	Actinomycetes	YAVLAHDAGQQVFGGDLADGPAEAPAHPDLAALREAVADGAAVPDLILAPCPTGTDAEPVDAVPARVRTAAHQLLALLQDFLAADGLAGSRLVVVTRNAVAADPGDPSADLAAAPLWGLTRAAQAEHPGRILLLDLDGEETSHRALRPALAAVEAAAETECAVRAGEPRVPRL
BGC0002526	K41A pak6	M4	ER	M	Streptomyces sp.	Actinomycetes	WPVLAVPGADVAGLLAGLDAGTSVPEVVLADVRGLGGSTDDADGLATATATLELLHTWSAEPRLADARLVLVTRGAVDVEDGPLDLSCAGVWGLVRTAQRENPDRFLLLDLDLDLDLDADLDVDIEADLGVASEAAGAVARAAVSYALDADEPQLAVRGGRVWVPRA
BGC0002526	K41A pak7	M5	EDH	M	Streptomyces sp.	Actinomycetes	WAVLGTDPLPAPMDPGPTATATATGYADLDALVTALDAGAAAPPVVLAGVEPAGDGLETTQHVLALLRGWLAEARLADSRLVVVTRGAVDADDGDADPAGAAVWGLVRSAQVEEPDRFVLLDLGDGAEVDTAIGAVRSALAADRPQVAVRDGRVLVPRL
BGC0002526	K41A pak8	M6	ER	M	Streptomyces sp.	Actinomycetes	WALLGPDMFGLSASASAVGCHSDVEALVDALGSGAPTPSAVLACVGGDRSTPSETPDDDAEALAVSGSVLGLLQSWLVEPRLTDVRLVLVTRGAVTTDVEGGGAPDMAGAAAWGLVRSAQVENPDRFVLLDLGGGPEDVAGIDDALRHARADGGESQLALRAGQVHVPRL
BGC0002526	K41A pak9	M7	EDH	MM	Streptomyces sp.	Actinomycetes	WAVLGTEATAADGTPAPDLDRYADLPALTAALDAGTPAPTAVLAPVPSAEGLESDGLALAQRMLELLQGWLAEPRLAETRLVLLIRGAVAVSTEDPDAAEPEHGSGGGTVLSAAAAGLWGLVRGAQAEYPEQLLLLDLDPDGAALADTATVRKAVARAVAANEPQAALRSGRLLVPRL
BGC0002526	K41A pak9	M8	ER	MM	Streptomyces sp.	Actinomycetes	WAVLGAGQASYGNLAELTAALDAGAAVPPVVFADLADLATADGRGGRGAGWEAPDGGLRAGADVLALVQGWLAEPRLAACRLVVVTRGAVVADDADDGAELDPAAAAVWGLVRSAQSEEPDRLLLLDLGPEHEVTGTATTEAVVRALAAGEPQVAARDERVLVPRL
BGC0002526	K41A pak10	M9	C2KR	MM	Streptomyces sp.	Actinomycetes	WLLVRPTGGAEDWLSVCTEALGDVRTIEVDAETGRDELAALLRGYDSDTPLTGVLSLLALDERGPLPGVARGLGETLTLLQALVDSGIGAPVWCASRGAVAVDDGERLDSPEQAQLWGLGRVAALEHPEEWGGLIDLPPGPRGLEAAALRAALNGPDDQVALRPSGIHARRL
BGC0002558	scopranone sprA	M1	EDH	MA3	Streptomyces sp.	Actinomycetes	WAVVGAPEPTLTTAASNAGHTVSRYPDLAALGRAVEAGSEPPDLVFVPLLAEQDALVDGAAVRAAVNRGLTLAQSWLADERLDASRLVVVTRGAVTAGPDTDAADLTHAGLWGLVRSAQSEHPDRFALLDLDREGTPPAGLSRPLLAAEPQLAVRAGMFLAPRL
BGC0002587	ossA1	M1	0DH-BKR	M	Streptomyces ossamyceticus	Actinomycetes	WALLGDPPGLDAGTLPGADRHPDLASLLTSATLPETVVARCGHAPVAPADPDWAAHAPDGTGHVPDGTGRALDGTGHVPDGTGRAPDGTGHVPDGTARAPDGTGRAPDGTGRAPDGTGRAPDGTGHVPDGTAHTPSGAPNAPDGTAEAARAAAHRAARLAREWLAEDRLADTRLVVVTRRAVAADDGLCEPGEAPVWGLFRSAQSEHPGRFVLVDLDDDPASASALPAAAACGEPQIAVRAGRLYAPRI
BGC0002587	ossA6	M11	ER	MM	Streptomyces ossamyceticus	Actinomycetes	YAALGPDTLDGTRTYGTVAELDAALTAGEPVPSAVVARCPVAAADDDPAAAAERATLWGLDLLRQWLGAAGTADLPLVVVTRGAAPAPGTPPTATGTAHAALVGLLRSAQAEEPGRIVLVDLADHESPAPTRTHDARPTPAPPDDEPLTPALLDAALAAAEPELAVRGGRMHGRRL
BGC0002587	ossA7	M12	AKR	M	Streptomyces ossamyceticus	Actinomycetes	WLLVDPGDAADTRVAEALRAAGADVEVAPCAVAGDFTGVVALPDSVADAVALVRELRSAGSTAPLWWITRDAVAVASGDPVRPEAAQLWGLGQVVGLEEPGWWGGLVDLPAAWQDGTGQALTAVLAGAAGGEDQLAVRGTDVFARRL
BGC0002587	ossA7	M13	A1KR	MM	Streptomyces ossamyceticus	Actinomycetes	WLLIATDPAGAPAASHNPEAPSASGDGIAAALRAAGAEVTVAAEAMAGDYAGVVASPRSLHDAVTLLRDLRAAEVRAPLWWLTQGAVAVAAGDAVHPEAAQLWGLGQVVGLEHPDWWGGLVDLPAHWTPDTGQWLTAVLAAAGGDGAAEDQAAVRDSGVHVRRL
BGC0002587	ossA8	M14	A1KR	MM	Streptomyces ossamyceticus	Actinomycetes	WLLIAPEGDGGETAEALRAAGAEVQVSAMPPAGLDGEYSGVVALPDSAGDALALTRELHAAGVRSPLWWLTRGGAAVATSDAVHGGAAQLWGLGQVVGLEHPDWWGGLVDLPRTWSESTPDLLAALLAGSAGGEDQLAIRGSAVYARRL
BGC0002587	ossA8	M15	EDH	M	Streptomyces ossamyceticus	Actinomycetes	WGMLGLDPRELRPRLAAAIGQDVVPYLDRDALTETIDTGVPAPAAVVVFRDRPGHDDAGADAREAALGTLDVLRPWLADQRLTGTRLVLATLGAMAAGPDDAAPRPAAAAVWGLARAAQSEHPDRVVLVDLDDDPASLAALPRAVATGEPQLALRRGTARVPRL
BGC0002587	ossA2	M2	AKR	M	Streptomyces ossamyceticus	Actinomycetes	WVLLVPGDDTGDDLSDWTANALAAHGAARVDRVTVTAATPREELAGLLRGHARATGVVSLLGTDITPCPGRPSVPAGTATTLTAVQALLDAGGAGPLWCLTRGAVSVGADTRTPADETADGPSPEQAQVWGLGRAVGLEAPGVWGGLVDLPVRLDDTAARALCAVLAAPGDEQEWALRGSGTHVRRL
BGC0002587	ossA2	M3	ER	M	Streptomyces ossamyceticus	Actinomycetes	CLPLPLTEDGGVDFGGIEGLPDAVVAHCPSGGVDDVTARVLRLSQEWLADERYTAVPLVVVTRRAATVAEPRPPTDAVRSGRTVDDTLAQAAVAGLVRAAQAEHPGRLVLVDTDGEPGDAADARVLPLAEILSCGEPDVAVRAGRVHGRRL
BGC0002587	ossA3	M5	A2KR	MM	Streptomyces ossamyceticus	Actinomycetes	WLIAVPEALRDDPGLLAAADALRERAERAVTLTVAPDDDADTLAARVREFAPTGVLTLTGADTTPHPADPVVPTGLATTLALFQALVRTGTAAPLWCVTRGAVGTADDAGPADPTQAAVWALGRAAAVELPQHWGGLVDLPATVDPAATDRLLAVLAGTDGEDQVAVRPSGVLARRL
BGC0002587	ossA3	M6	BKR	M	Streptomyces ossamyceticus	Actinomycetes	WAVLGQPDGRAGLLAKALALHTGNTAVVRPDASTVDEAADLLVLPLEPAPRTESGADRERDQGGDRGRGGPDAVRRLTHDTLARVQSVLAQERSADHRVVVVSGGATTGDPAGAAAWGLLLTLQAEHPDRFLLVDLEDDGTDAVALASAVTTALARSETQIAVRGGELWVPRL
BGC0002587	ossA4	M8	EDH	M	Streptomyces ossamyceticus	Actinomycetes	FAVLGDPTAYTHVEPLLRTAGSVELHADLDALSGAGTPPDVVVVPLPPAEPTAAAARDAVHRVLGLLQRWTTDPAFAASQLVLCTSGAVRASADETLTDPAGAAVWALARSAQLENPGSVLLIDHGPDATTPLPRAVAHALHLDEPQLALRADGTHVPRL
BGC0002673	iminimycin pks1	M1	EDH	MM	Streptomyces griseus subsp. griseus NBRC 13350	Actinomycetes	AVTDIETGFAELADVPEFVVLDVASRAPGSVVAETHRVTARVTELLREWLADERFTASTLVLRTRHAVATGAPADADAVADLVAAPVWGLVRTAQAEHPDRLVLLDADGDLDAGLLAGAVASGEAQFAIRDGAVLVPRL
BGC0002673	iminimycin pks2	M2	EDH	M	Streptomyces griseus subsp. griseus NBRC 13350	Actinomycetes	PVPHTVLDVPDGTVHDVTARVLSALQEKLAGDGTVAVVRRGDDLSAAAVEGLVRSAQAEHPGRIVLVDTDGSVDLATVVGDEPHVSVRAGAVLAPRL
BGC0002673	iminimycin pks2	M3	EDH	M	Streptomyces griseus subsp. griseus NBRC 13350	Actinomycetes	RTTEHTLIEVPTGNVHDVTEHILTTLQTHLTDTTDNHLIILTRNAVNTPTPDLAAAAVWGLVRTAQTEHPDRITLIDTDDTLDPTTLTGNEPQLTIRNGKTHAPRL
BGC0002673	iminimycin pks3	M5	ER	M	Streptomyces griseus subsp. griseus NBRC 13350	Actinomycetes	VDAPEAPHQVLSVPRGGELHEVTEYVLTALREWLALDTDDVLVVHTHDAVDTGTPDLAAAAVWGLVRSAQTENPGRIVLLDGGFDATVIGGAVAVEENQLLVRGDEVRAARL
BGC0002673	iminimycin pks3	M6	0DH-CKR	M	Streptomyces griseus subsp. griseus NBRC 13350	Actinomycetes	KSGMTGFDVLEVPRFGELDGVLTTVLHALRSERSGPLVVHTHDAVHTEDPDPVAAAVWGLVRTAQHEEPGRFVLVDGETVPAALPDDEPQVVVRGHETLVARL
BGC0002697	azabicyclene PKS	M1	EDH	M	Streptantibioticus cattleyicolor NRRL 8057 = DSM 46488	Actinomycetes	PSDGTTAPELTFIEPVTATGDVLADTHCSVPAAHGALRAWLAGDPAPGARLAVVTRGALADGPGAPAAAAVWGLVRSAQSEHPDRFVLVDMADDTEVPHDLVAAAVAAGESQLVVREGALSVPRL
BGC0002697	azabicyclene PKS	M2	EDH	MM	Streptantibioticus cattleyicolor NRRL 8057 = DSM 46488	Actinomycetes	GAPGADRPDLLTATPDGGDPARAARTATAEVLAALRERVADPDAAPLAVVTRRAVVLPGDGHAPDPAAAAVWGLVRSAQSEHPGRFLLVDTADDTEPAHDALAAALAAGEPQLALRGGTFTVPRL
BGC0002697	azabicyclene PKS	M3	EDH	M	Streptantibioticus cattleyicolor NRRL 8057 = DSM 46488	Actinomycetes	ADGRARLAVVTEGAVAVGGEPVADPAAATAWGLVRAVQSEHPGRLVLLDTDAAAASRAAVADALATGEPQLALRDGTVHAPRL
Camporidines	QCF28928 camE	M1	EDH	M	Streptomyces sp.	Camponotus	WTELSDDTPDFTEAPDTGTAVVRVGAHETDGTLTADATARTLRLVQRWLADEQLTEARLAVVTTGAVAALPGEDVPGLGSAPVWGLIRSAQSEHPGRFTLIDLDDPADDDALTAALALDEEQVAVREGRCHVPRL
Camporidines	QCF28928 camE	M2	EDH	M	Streptomyces sp.	Camponotus	WVVLGDGKSVPDLAELPAQTVPDTVLVRLPTTPDDTAELAARARSTAVDVLGLVRGWLAGERFADSRLVFVTSGGVAVGKGDAADLGVAGVWGLVRSAVTENPGRFGLVDMDLDADPVLLAGALGCGEAQVAVRGGGLLVPRL
Camporidines	QCF28927 camD	M3	EDH	M	Streptomyces sp.	Camponotus	FAVIGDDTLGLGDSVRAWPDLDALPEDVPSTVIVPLPSPAEGDVPSAARRTLTDVLGLVRGWLAGERFADSRLVFVTRGGVAVGEGDAADLGVAGVWGLVRSAVTENPGRFGLVDVDLDADPASLAGALGCGEEQVAVRAHGLFVPRL
Camporidines	QCF28927 camD	M4	0DH-CKR	M	Streptomyces sp.	Camponotus	LAVLGPDGSDGTDGSDGSDGSDGPDGPDRYDSLDAVGDAVASGAAVDAVVVPWPATGDGGGSAALHDGTRRALTLVRDWLADERLAGTRLLVVTRGGVVTGGDAAAVDPAAAAVRGLLRAARSEAGGQIVLLDDDTPGDGTGAEAPPARSVLASLLASGEPEAALRDGRLLVPRL
Camporidines	QCF28926 camC	M5	EDH	MA10	Streptomyces sp.	Camponotus	WATLGATGYTDPADLAKAVEAGIPVDAVRHDVDTDPRPGHTDDSAAAHAPGAAHRHTREVLALVQDWLADQRLTAIPLVLVTRGAVAADGRPVTDPAAAAVWGQIRSAQSENPGRFVLVDLDEDTPSTALSALLRSAEPQAAVRAGRVLLPRL
ciromicin	cirP7	M2	ZDH	M	Amycolatopsis sp. FU40	Actinomycetes	VVAIGRGRVGVAATYSGFADLLGAVDRGEPVPGLVTLSVPVAEGAVPEAARANATWLLAEIQAWLAESRLTDTKLAIVTQAAVPAGESAVDVTQGLLWGLARAAQAEHPGRVFLIDADADTKVETITAVVASGEPESAIRAGSVLAPRY
ciromicin	cirP7	M3	EDH	M	Amycolatopsis sp. FU40	Actinomycetes	WAVLGTDDLGLGVPLKAELVDADVLVLPVGSGSGSVPSQVHEVVQETVRHLQNWLSAGDGKLVVVTRDELAQAPVWGLVRAAQAENPGRIQVVDLDASPASARALPAVVASGEPEARVRNGEVRVPRL
ciromicin	cirP6	M4	EDH	M	Amycolatopsis sp. FU40	Actinomycetes	AILGDDHFGLGGESYVDLNALLEAIHNGALVPDVVYVPFAAPETATPEGARAAVHNLLSLSQSWVTEDVLAASRLVVVASGAIATRPDEGAPDLTHSALWGVIRTAQLEYPDRFMVVDLDNGPLPIGSVLGAMYADEPGVAVRDGAVLVHRL
ciromicin	cirP3	M5	ZDH	M	Amycolatopsis sp. FU40	Actinomycetes	NTGEQHDFRILEVSTPECRVPEAARAVAAKVRSAIQETLDGDGRLAVVTRGAVSVHGEDVDPALASAWGLVRAAAAENPGRFALVDGDPEAALPTGEPETAVRDGQVFTPRF
ciromicin	cirP1	M7	EDH	M	Amycolatopsis sp. FU40	Actinomycetes	RSADLEATVDTAEAQILECIGESGTAAETHELTHRVLAALQSWLSEEHPSDARLVVVTRGAVPAAGDVTDLAASAVWGLVRSAQEENPDAFVLLDLDAETTPEAVLPQVLASGEAQAAVRLGTVLVPRL
ciromicin	cirP1	M8	EDH	M	Amycolatopsis sp. FU40	Actinomycetes	WTVVGDDPFGLTEALGATAAPSIGDASGLVVLPSAGNDVHAELHRVLGELQTFLSRPEGSLLVVTRGAVAADAEESPDPVGAAVAGLVRSAQAEHPDRITLVDLGTGTPSGRTLAAVSASDEPQVALRAGAVLVPRL
ciromicin	cirP4	M9	EDH	M	Amycolatopsis sp. FU40	Actinomycetes	AAYEVYSAKAGNNAVSAKKAVHSALSKLQADSKEKLLVVTGNDLAGAAVAGLVRSAQVENPGRIVLVEGDATDEQLAAIAAADESAVRVSGTEVRVPRL
concolactam	conJ	M1	ZDH	M	Streptomyces sp.	Actinomycetes	WAIAGADPLGLADTLGVPVHPTLTELGAAADADGPVPDVILVTHRTEATSTGTDPLATTRAALAQLLGTVKSFLTDERFAGSRLVLLTEGAVATTDDDTPPALDTAPLWGLVRAAEAENPGRFVLVDGDPAGVSAGVLSAALASGEPELALRGGSVLVPRL
concolactam	conE	M10	EDH	M	Streptomyces sp.	Actinomycetes	AGVSASLPGGWGLWEDVVGGGAVPGVVVLRCGGVGSGPGVVRDVVSGVLGVVQGWLEDERFAGSRLLVVTRGAVSVDGGDVLDLAGAAVWGLVRSAQAGAPGRFVLADLGEGMGLEDGVAVALSVGEPQVVVCEDGARVARL
concolactam	conI	M2	EDH	M	Streptomyces sp.	Actinomycetes	SLGATPLAAAGTVTEYADLAALQAALDGGAVAPEQVLCPVPDLTGGYTLPDAVRATAHWLLTTVQQWLADERFALSRLVVVTQGAAIAPLGEVAGRQAAASLTQAPLWGLVRAAEAENPGRFVLVDGDPAGVSAGVLSAALASGEPELALRGGSVLVPRL
concolactam	conI	M3	EDH	M	Streptomyces sp.	Actinomycetes	WAFIGEDDLGLAADLGLAPDALPVHADLAALRAAVDAGTKAPELVLHRCPGAAEGDVAERTHRTAAEVLGLVQEWLADSRFADSRLMLVTHGGVLTETEPTEGTPNDLSQAPVWGLVRSAQQEHQDRLVLVDLDGSDTARRTLPAVASLREPEAAVRGSEVKVPRL
concolactam	conH	M4	EDH	M	Streptomyces sp.	Actinomycetes	PAGVGSFVRWEDVAAGGEFGADAVVFAVPEAAAGDVPGALRSVVGGVLGVVQGWLSDERFADGRLVIVTRGAVAVDGGGVSDLAGAGVWGLVRAAQAEHPGRIVLGDVDGSAGAVELVVGCGEPEVAVREGRLWVPRL
concolactam	conH	M5	EDH	M	Streptomyces sp.	Actinomycetes	PSLTSWADVVDDQAVATDADVPEVLVYTCPATPVGDGPGDSTRAVPAAAHEVTATVLAVLQRWLTDERLADARLVIVTRGAVSVEGGQVTDVAASAVWGLVRAAQAENPGRIVLADLEGPTDGSRDSASVDELPGAVQFAIASGESEVALRGGRIRVPRL
concolactam	conG	M6	EDH	M	Streptomyces sp.	Actinomycetes	AGVGSFVRWEDVAAGGVVGADAVVFAVPDVPGDVPGVLRGVVGGVLGVVQGWLADERFADGRLVIVTRGAVAVDGGGVSDLAGAGVWGLVRAAQAEHPGRIVLGDVDGSAGAVELVVGCGEPEVAVREGRLWVPRL
concolactam	conF	M8	EDH	M	Streptomyces sp.	Actinomycetes	QQGAATIGTWEELDRGALVPDVVILEAVGPDTTALPTVEGASGLDDSADAVHEATHRVLGAVQDWLADTDERFDTSRLLVVTRGAVAVADPVSVQGDATASDGTTGTGLGSDGLIGAAIAGLVRSAQMENPGRILLADVDATADPRSIGAVVVAAGEDSVAIRDGAVYAPRL
concolactam	conF	M9	EDH	M	Streptomyces sp.	Actinomycetes	AGVSASLPGGWGLWEDVVGGGAVPGVVVLRCGGVGSGPGVVRDVVSGVLGVVQGWLEDERFAGSRLLVVTRGAVSVDGGDVLDLAGAAVWGLVRSAQAGAPGRFVLADLGEGMGLEDGVAVALSVGEPQVVVCEDGARVARL
cuevaene	PKS1	M1	EDH	M	Streptomyces sp. LZ35	Actinomycetes	EFERYVVPTVGDDVLADTHRITTETLTHVQQHLAQDITTPLVVEAAYDDLAGAAVWGLIRTAQTEHPNRIILIDTDNHPTSRKALPTLIASGEPQARIRGGAITLPRL
cuevaene	PKS1	M2	ER	M	Streptomyces sp. LZ35	Actinomycetes	YTVPTTGDDILADTHHITAETLTRIQQHLAADTTAPLVIEATYDDLAGAAVWGLIRTAQTEHPNRIVLVDTDNHPTSQEVLPILVASGEPQARIRDGAITLPRL
cuevaene	PKS2	M3	ER	M	Streptomyces sp. LZ35	Actinomycetes	YAVPTVGDDVLADTHRITAETLTHVQQHLAQDTTTPLVIEATYDDLAGAAVWGLIRTAQTEHPNRIILIDTDNHPTSRKALPTLIASGEPQARIRDGAITLPRL
cuevaene	PKS3	M4	EDH	MM	Streptomyces sp. LZ35	Actinomycetes	GFERYVVEPTGDDVVADTHRATTDTLAHVQRHLTATTTPLVVQAPYDDLAGAAVWGLLRTAQTEHPGRIVLVDTDDHPASQEVLPILVASGEPQARIRDGAIALPRL
cuevaene	PKS3	M5	EDH	MA21	Streptomyces sp. LZ35	Actinomycetes	EFERYEVPTVGDDVLADTHRITTETLTRIQQHLAADTTAPLVIEATHDDLAGAAVWGLIRTAQTEHPGRIILIDTDNHPTSRKALPTLIASGEPQARIRDGAITLPRL
cuevaene	PKS4	M6	EDH	M	Streptomyces sp. LZ35	Actinomycetes	DFEQYTVPTAGDDILANTHHITTETLTHVQQHLAQDTTTPLVVEATYDDLAGAAVWGLIRTAQTEHPGRIILIDTDNHPTSRKALPALIASGESQARIRDGAITLPRL
dactylide	dacA1	M1	A2KR	MM	Dactylosporangium aurantiacum	Actinomycetes	WLLVHPDTPTTGTLTEAVAAALTAHGATVRPLAVDLPGTDRPALAALLREALPAPVAGVLSLLATGDDGTPTPVPAGAAGTLLLVQALADLGVAAPLWCVTRGAVAVDGERPAAPAQAQTWGLGRVAALEHPRTWGGLIDLPATDLDDRAAARLCAVLAGGGALAGEDQVAVRATAVLGRRL
dactylide	dacA4	M10	A1KR	MM	Dactylosporangium aurantiacum	Actinomycetes	WLALIPEGYRVPDRLGEVLDITPVAVDAATADRATLAAASAVVPAPAGILSLLALDERPRPDQPHLTAGTAATLLLAQVLGDLDGTTPLWCVTTGAVSTGPDDPLRAVDQAAVWGLGRVVGLEHPGRWGGLVDLPAPVDALDDAALRRLAAVLNGGGAEDQLAIRKRGVLARRL
dactylide	dacA4	M12	BKR	M	Dactylosporangium aurantiacum	Actinomycetes	WLVLHRTPDPLVDRVAAALTAAGATALPVTDVPDGDHAGIVSLLALQDTGDGPVPAAVAATTDLIQRTAGVDARLWVLTSGAVSIGASDPLRSPAHAGVWGLGRAAALEYPHRWGGLVDLPGTVDDRTVQRLAGVLAAAGGEDQVALRGSGVFVRRL
dactylide	dacA4	M13	ER	M	Dactylosporangium aurantiacum	Actinomycetes	WAVVGDDPLGFGAAADAAGVHLETYADLTALAAAAANGARVPSAVFLVSAGDATAASAHALAGRALTAVQEWLEHPAFGGSQLVFLTRDAVGDDVRDPAAAAVHGLVRSAQTEHPGRFVLADVDSATDSLAALPAALATGEPALLLQGGTARIPRL
dactylide	dacA1	M2	A1KR	MM	Dactylosporangium aurantiacum	Actinomycetes	WLVVAAGDDQPGTVDGPADAVLAALAAHGAQARLLRLPPGEADRGRIAERLRPLADAAVDGVVSLLAWDEAPHRAVPELPAGLAATVGLVQALHDEGVGAKLWCVTGGAVSVGAGDLLHRPVQAQVWGLGVVAGLDDPDGWGGLVDLPSTVDGAAAARLCAVLAGIGDEDQVAIRADGIYGRRL
dactylide	dacA2	M3	AKR	M	Dactylosporangium aurantiacum	Actinomycetes	WLLVTHTGDAALHDALTRAGATVRTLTVAEHTDRAAMTGLVAAAGTGLTGVVSALAASATPAPGPAPVTAGVTDTLTLLQALGDAGIGAPLWCVTGGAVTTGPSDPVRDPMQAAVWGLGRVAALEHPDRWGGLLDVTGDLPPESLAAVLRGAEDQVAVRDGTVHARRI
dactylide	dacA2	M4	B1KR	MM	Dactylosporangium aurantiacum	Actinomycetes	WLVVLPAADRAGTWTGHLVAELLAAGVRADVLTLPAGADRATTAAHLRTALHGDLAPDRILSLLAADERPHHPGTALPAGLTATVALLQALGDVACPAPLWVATRGAVSVGAGDPVIAPLQAMTWGLGRIAALEHPDRWGGLIDLPADVTAAAAARLAAAVDSAGADGAAGGEDQVAIRGAGTYARRL
dactylide	dacA2	M5	EDH	M	Dactylosporangium aurantiacum	Actinomycetes	WAVLGLNPVKLVKALGATGAAVESYPDLDALRDAVTAGAAVPDRVVVSCADRPEGADMAARVRSATYWALDLVQAWLADERLTGSRLVFVTHSTGGDTVDDLAWAPVWGLVRSALTENPDRFVLLDLDDRDVSYAALPAALMCGEGNVAVRVGGVHVPRL
dactylide	dacA3	M6	EDH	M	Dactylosporangium aurantiacum	Actinomycetes	YAVLGADPAGAAAALTAAGATVDVYQDFAALRAAGTAPDRVVATVDTAGDDLAATVHARTAAALALVRQWLADPPAGAALRVVVSATGADAVASAAVAGLIRAADAEHPGTFGAVEVHDERPAGATLAAAVAVDEPSVTVRGGEVLVPRL
dactylide	dacA3	M7	BKR	M	Dactylosporangium aurantiacum	Actinomycetes	WLVVGGASEAVVAALTAAGADTVTAPVREGRLREGSFAGVVALPTDAAEALDIVQTLGDAGIDAPLWCVTRGAATDPAQRAVWGLGRVVALEHPDRWGGLIDLADGDRDLALLPAVLSGTEDQVTIRGGVAHARRL
dactylide	dacA3	M8	BKR	M	Dactylosporangium aurantiacum	Actinomycetes	WLVLGDRSEAVAAALTAAGATVVGEDPPGEGPFAGVVALPADAAEALTMAQTVDAPMWCVTRGAATDPAQRAVWGLGRVVALEHPDRWGGLVDVDDAGVALLPAVLGGVEDQVTIRGGVAHARRL
dactylide	dacA4	M9	BKR	M	Dactylosporangium aurantiacum	Actinomycetes	WLVLGDRSEAVAAALTAAGATVVGEDRPGEAPFAGVVALPADAAEALTMAQTVDAPLWCVTRGAATDPAQRAVWGLGRVVALEHPDRWGGLIDLADGDRDLPLLPAVLSGTEDQVAIRGGVAHARRL
dactylosporolide	dacA	M1	A2KR	MM	Dactylosporangium fulvum	Actinomycetes	WLVVHPAGGPLAEPVAAALGAAGAAVRAVAVDGRDTGRDQLADVLRAALDGDEPAGFLSLLAVDGRPRADHPVVPAGVAANLLLLQALDDVGAAAPLWCVTRGAVAVDGAAPEAPEQAQTWGLGRVAALEHPQRWGGLADLPAEPAQADLAALCHVLGGAEDQVAIRPAGIFARRL
dactylosporolide	dacD	M13	ER	M	Dactylosporangium fulvum	Actinomycetes	WAVVGEDPLGFGAAADAAGVHLESYADLTALAGAAAGGAPVPAAVFVVCSGRLAADPAQAAHALTARALDAVRAWLDAPAFAASRLVFLTRGAVGDDVRDPAAAAVHGLVRSARSENPGRFALVDLDTSAESLAVLPAALDSDEDDLLIQHGTVRVPRL
dactylosporolide	dacA	M2	A1KR	MM	Dactylosporangium fulvum	Actinomycetes	WLVVAPDDAAADAPTGAADAPDPAREPTGAVLAGSERHGAVVAALARHGATVELVRLPVAEADRDRIADRLRAAAAAGPVDGVLSLLASDETPHPALPGVSGGLAAGVAIVQALHDAGVTAPLWCATSGAVSVGAGDPVDHPIQALVWGMGLVAGLDDPVHFGGLVDLPSTVDETTGARLCAVLAGTAGDEAQLALRPAGVFGRRL
dactylosporolide	dacB	M3	AKR	M	Dactylosporangium fulvum	Actinomycetes	WLVVGASTLADALAAGGAEPVVVEPVWERGALADRLRAAGTVAGVLAAPAGAFEALTVLQALGDAGIGAPLWCVTSGAVADGPVRDPLRAAVWGLGRVAALEHPDRWGGLVDLPAEPDTTDLAALCGVLGGAYGTEDQLSIRGGAVRVRRI
dactylosporolide	dacB	M5	EDH	M	Dactylosporangium fulvum	Actinomycetes	WAVLGNHSVKLLKALGTTGAAVEAYPDLAALSEAVRAGAAVPDRVVVSCAERPEGDGMSARVRSATYWALDLVQSWLADDRFEGSRLVFVTYSTGGDTVDDLAWAPVWGLVRSALTENPDRFVLVDLDDRDVSYAALPAALLCGEGNVAVRVGAVHVPRL
dactylosporolide	dacC	M6	EDH	M	Dactylosporangium fulvum	Actinomycetes	GTTDAGQLPVAAGQPGDTHADLVALRTSLDAGAPPPDRVLAALGTSDVHAATGWALTLVQEWLAEPRLSGAVLVFTLPGDGPAAAAVDGLVRSAQAEHPGRFAVISGVPAATAGGAALVRALTSGEPVTVLDGDTVLAPRL
disciformycin	difG	M1	ZDH	MM	Archangium disciforme	Myxococcota	WLVFADDQGVAEAAAGLLSASAHAVHRLHPADAFRRDGNDFHIRPNEPEDYRAVLQALLASRGPALPLGVLHLWNLRLPEGGATAVPDLREMAKLGNLSLTHLLKALDGAGGSAPPRVWIGTRGAWALPGSEQGLAPAQSAVWGLTRAIAQEHPALWGGIIDLDPLEAPRLQAERLVTEVSVPQPAEDRILYRQGRRQVSRL
disciformycin	difB	M2	AKR	M	Archangium disciforme	Myxococcota	WLVLGASGGLPEALAARLRATPDLVRHVSLEALRSVPVPPHGLVDAERLERWFTDTLQVDLAEFDFLVYVPACGAPEDASAERQVSEDCAILVSLAQALERRPGARGPALWVVTSGAQAVAPREPVNPFAAPVWGLGRVLALEAPRGLGGLVDLPLAWSEQDVGCLLEALRHPGEEDQLALRSGQRHALRL
disciformycin	difC	M3	EDH	MM	Archangium disciforme	Myxococcota	WLVLGAPGPLHDRVVAELRGRGLDTVQAFPANTWEEQDAARFHLSPADPEHLRRLMERVSADRPLRGLINLQPYQVARGDAASSAPEGVLSALYMEVLDQARALQGVSRRERPKLVLVSGVSQGAEAEPDLVAAPLQGLGRVIAAELPRLHCVQVQLGGQEPEVEARDLVRELYANDGEDEVVLRGGARHVRRL
disciformycin	difF	M6	0ER-EDH	MM	Archangium disciforme	Myxococcota	WLLFADDQGVAAAVADRLAPSGVRTTLVRKAPGAVTRAGSGWTLDPSTPESFRELLAAVPPGSFTRVLYFWGLDAPAVDPEPDALDARLPETEALIYLVQALAAREAQPGPRLWLVTAGALPGADGEAVSPMQTPLWALGRVLDYEHPELKTVSCELERHVTEKHVAVLTSLLLAPEVPDQVRVRADGPAAARL
Eco0501	PKS1	M1	EDH	M	Amycolatopsis orientalis ATCC43491	Actinomycetes	GVAEYRLYPDLTAVDDVPPVVAVRCTTLESVLDLVQTWLADDRFAPARLALLTDGAVATENPDPAAAAMWGLVRSAQAEHPDRLVLADVTGEDGLAAGLASGEPEFAARDGAVLVPRL
Eco0501	PKS5	M10	EDH	M	Amycolatopsis orientalis	Actinomycetes	RARAADTAPAVRSEVDSLVNVREATAQTLAALQSWLADESNADTPLVVLTSGAVSVAGEDTRDLARAAVWGLVRSAQSEHPGRFVLIDTDTEPADLAGAVATGEAQLAIRDGKLWAPRL
Eco0501	PKS5	M11	EDH	M	Amycolatopsis orientalis	Actinomycetes	WAVVGVDDYKLDAALTAAGYRGQAYADLAALAEAMDRAPELVFVSCAPDHRQGLAAAAHTAAHRALELVRAWLAEDRFAGSRLVLVTGGAVGEPAQAVIWGLIRSAQSEHPGRFVLVDLDEQDASYRVLLPALASGEPQLELREGTVKAPRL
Eco0501	PKS6	M12	EDH	MM	Amycolatopsis orientalis	Actinomycetes	PAGATEPHDATVWHCESGDLRTVLGAALERVRTWLDEPGDGPLVVATRGGIATERPDPVTAAVWGLVRSAQSEHPGRFVLVDGDVPAALPAGESQVVVRDGVGFVPRL
Eco0501	PKS2	M3	EDH	M	Amycolatopsis orientalis	Actinomycetes	GEPTVESFVDFDDVRQATAHARQIAVEPGEAPVVFLTSGAFTDPAQASVWGLMRSAREEYPGRFVLVDADDPATLTAGLLAGIVASGETEAIVREGEVRVPRL
Eco0501	PKS2	M4	ER	M	Amycolatopsis orientalis	Actinomycetes	ETLPAESVFSVPRGGDSAERVHETTAAVLEVVQRRLEDEPGGPLVVHTRGGVAAGDGEAVTDLAHAAVWGLVRAAQSENPGRFLLVDAETLPDGRILAIDEPQIALRDGRALAPRL
Eco0501	PKS3	M6	EDH	MM	Amycolatopsis orientalis	Actinomycetes	PAPVGPAPEEPGVWRCPEGELRPVLEEVLKRIQADSTATTVVLTSGAVASASPDPVAAAVWGLVRSAQAEHPGRFVLIDARTEDEVRTALATGEAQVAVHDGKPLVPRL
Eco0501	PKS4	M8	EDH	M	Amycolatopsis orientalis	Actinomycetes	DVRIGAGESYVDVAALLAAKTPEVALLVCPSGETAEAVHDATVWALRQVRDWLADERLDAHRLVLLTDGTDLAQAAVRGLFRSASSEHPGRFGIAETTGDPVRVSADESELRLENGVAYAPRL
Eco0501	PKS5	M9	EDH	M	Amycolatopsis orientalis	Actinomycetes	TIPAEAAAEYVVASFTGYTGDLLGDAHAAAVRALELVHADSGGPKLVFLTSGAVGDAVPRPAQATVWGLVRTAQEEFPDRFVLLDADTEPTPEFIAAAVATGEPELLLREGVLSGARL
Eco0501PKS1	PKS1	M2	ER	MM	Amycolatopsis orientalis ATCC43491	Actinomycetes	VTVLSDGDLTALAEIPDVVLVPVGAEAGDLTESVHRTTARVLDLLRTWLDDERFADARLVLHTRGAVADVRDLPAAAAWGLVRSAQAENPDRIVLLDSDTDLPPALLAEVLATGEAQLAWRDGELLVPRL
Eco0501PKS2	PKS2	M5	ER	MM	Amycolatopsis orientalis	Actinomycetes	VVVLGEDCADLAELAADLDAGRPAPDVVLTTCAPVTGDIAEGAHAAARDALTLVQNWLADERFSGARLVFRTSGAVSVAADEPVSDPANATVWGLVRTAQEENPGRFGLLDTDGSEAVLGAALALDEPQLALRAGTVLGARL
efophylin	orf7	M1	0DH-B1KR	MA3	Streptomyces malaysiensis	Actinomycetes	WAVLGDDPLGLSAAVDAVPYDEMAEVPDVVLVPCAAEGRTDVAEAAHEATHRVLVLIQRWISDERLAPSRLVFVTRGAVAAVPGEEVPDVAHGAVWGLVRSAQSEHPGRFTLVDLDTDPESATALPAAVASGEPQCAVREGLVRVPRL
efophylin	orf8	M3	C1KR	MM	Streptomyces malaysiensis	Actinomycetes	LLVAVPAEAGPADSGAEDSGAAETGAAEAKPVATEAIVAGLAALGVETVPVRIGADDTDRDRLATRITEALGEAGAPGGVVSLLALDEAPHPEHRDIPTGFATTLALVRALGDAGIDAPLWCVTRGAVSTGGADRLGAPAQALVWGLGGAVALEHPQRWGGLIDLPGSLDEGSLRALARALGGRGGGEQLAIRASGTLARRL
efophylin	orf9	M4	A2KR	MM	Streptomyces malaysiensis	Actinomycetes	WLLAVPAGHLVGHDVEHSVGHPVGHPVGHPVGHLGTELIDAVRDGLETHGATVVTVEVAEADRAAVAARLAEATAGAAPSGVLSLLGLPDAPHPGHAGVPMGLALTLALVQALGDTGVAAPLWLATRGGVSAGGTDALDSPAQAAVWGLGRVAALEHPQRWGGMIDLPDTVDGRVTTRLCGALAGRLGDEDQLALRPSGVFVRRL
efophylin	orf10	M5	B1KR	MM	Streptomyces malaysiensis	Actinomycetes	WLIAALAGAPEGPRVAEALRERGAQVRLVELTEADVVREALARRLDEATADAPPTAVLSLLALAEEPYRAGTAQPLGLALNLALLQALGDTGADVPLWYATRGAVSVGRADVLDHPLQALTWGLGRIAAAEYPRRRGGLVDLPGTLDDRTVARLCGVLAGRLTGEDQVAVRASGVHGRRL
efophylin	orf10	M6	EDH	M	Streptomyces malaysiensis	Actinomycetes	WTLLGDDDFKLVGLDVRTYQNLAALPADPAAMPATVLVPCAPEPRGVADAVRTATHRALALLGAWLTEERFADSRLVFITRGAVATTPGADVPDPAHAAVWGLVRSAQSENPDRFVLVDLDEHEESALALPTALALDEPQLAVRRGDITVARL
efophylin	orf11	M7	EDH	M	Streptomyces malaysiensis	Actinomycetes	AALVGDDGLEVTESLFAAGVHLESYVDLESLGAAVDAGTAAPAAVLVCCQAGPGAPADAVRDSLRTALELARSWSADERFADSRLVFITRGAVATAPGAEVTDLPGAAVWGLVRSAQSENPDRFTLVDLDAHEESVRALPAVLPSGEPQLALRAGQPHTPRL
hexacosalactone	hclA	M1	AKR	M	Streptomyces sp.	Actinomycetes	WLVAIPAGLAGDEWVVACVAALAGRGALPVVVELEHDDADRAVMADRLRGALDEADVSDAGGVLSLLALAEGRHGEYGAVPLGVALTLSLLQAVGDAGVGGRVWCVTRGAVAVGGSESPLSVGQAAVWGLGRVAGLEAPERWGGLVDLPEVWDARVADRLVDVVSGRVGEVEVAVRASGVFARRI
hexacosalactone	hclD	M10	EDH	MM	Streptomyces sp.	Actinomycetes	WALLGTGSPYVADVGQSGPASPAAYPELADLIQAMNDGIVTPETVLVSFTADSGARVGDPAEAREMAHRALRVVQEWLAEERFAGSRLVVVTRGAVAAVPDEDVPDVAAAAVWGLVRSAQAEHPDRFVLVDVDDDTPVSAGVLRAVLECGEPQVAVRSGNVLAPRL
hexacosalactone	hclD	M11	EDH	M	Streptomyces sp.	Actinomycetes	VAEVATLDGADWHDMAALRESIGVEGSVPPAVVCVVPSVPTVEGGQPTGGDEIRGVIHRALGLVQGWLAEERFAGSRLVIATHGAVTVEDGEERQNDGIAVDLAAAAVWGLIRTAQTEHPGRFVLVDLDADLDVDLDVYMDVDLDGPEQESGESGRRPLTSETLSLLSAAVAGGEPQVAVRGGRLLAPRL
hexacosalactone	hclD	M12	EDH	MM	Streptomyces sp.	Actinomycetes	WAVLAEGDTGLSAALKSAGTAGALAETYADLSALGEAIEAGRTAPDLVFASLSSPVVLAPSAETVRVAAHRALALVQSWLADGRFGRSRLVLVTRGAVGVRPGESLADPACASVWGLVRSAQSENPDRFLLLDLDDQEASFAALPQALSGDEPQMAVRGGGVLVPRL
hexacosalactone	hclA	M3	ER	MM	Streptomyces sp.	Actinomycetes	CAVAGPDAFGLARALKAADGSVEEHADLAALEAHVRSGAPTPDLVFVTMSSGAGEDIVPATRTVAHRTLDLVREWLAEDRFAGARLVFVTRGALATEDGADPRDLAAAPVWGLVRSAQAEHPDRFVLLDVDGGEPSLAVVHQAVSTGEPQLAVRGAEVLVPRL
hexacosalactone	hclB	M4	B2KR	MM	Streptomyces sp.	Actinomycetes	WLLLAPDSRTGDPLVTASREALAGHGADVVLVELGEDDADRATVAERLRAATADHPLNTLSGVLSLLPLDERPYPAHPVATTGLTLTLALIQALADLGVRAPLWCATQGAVSIGSSDPLTSPAQAAVWGLGRVAGVEYPDSWGGLIDLPRTMDTRAGTRLAGVLAAGGPEDQVAIRGSGVMLRRL
hexacosalactone	hclB	M5	BKR	M	Streptomyces sp.	Actinomycetes	WLLAVPAGMAADPWVSACADALTGRGVWPVRVELGADDTDREAVAERLREALAGSEASDVAGVLSLLALVEGRHDQYRSVPLGVALTLSLVQAVGDVGVAAPVWSVTRGAVAVSGSENVREVEQAAVWGLGRVAGLEVPERWGGLLDLPEVWDARVADRLVDVVSGRSGEVEVAVRASGVFARRI
hexacosalactone	hclB	M6	0DH-B1KR	MM	Streptomyces sp.	Actinomycetes	GAELRTALESGGGRIDEYDDMGALLRSDASATAVPDLVLLPFLTASATDTVEAEGDLVSVAHQATHRALDALQAWLADARCADARLVVVTRGAVAAVPDEDVPDAAAATVWGLARSAQAEHPDRFVLVDLESLEWAAEALGAAVATGEPQIAVRGGGLSAPRL
hexacosalactone	hclB	M7	BKR	M	Streptomyces sp.	Actinomycetes	WLVAVPAGLADDAWVADCVAALAARGALPVVVELEDADADREAVGARLRDAVGADRAADVTGVLSLLALAEGRHGEYGAVPLGVALTLSLLQGIGDVAVGGRVWCVTRGAVAVGGSESPLSVDQAAVWGLGRVAGLEAPERWGGLVDLPRTLDSRALERLTAVISGATGEDEVAVRPSGVFARRV
hexacosalactone	hclC	M8	ZDH	MM	Streptomyces sp.	Actinomycetes	WAMVGPDDLGLTAALGAAEQEVSSSPELATLAGNPDVVLMACVSDSDSGAEDLPTTTRHLAHRALCVVQEWLAEERFAGSRLVVVTRGAVAAVPDEDVLDVAAAAVWGLVRSAQAEHPDRFVLVDVDDVPASAGVLRAVLECGEPQVAVRSGNVLAPRL
hexacosalactone	hclC	M9	EDH	M	Streptomyces sp.	Actinomycetes	CALIGEEDGDLAVALRSADWQVGTHPGLEALARSGAEGEPLPEWVLPASPIDPGGDARRGVGGAAHRALEWVQEWLAEDRFADSRLVITTRGAVATSSTESVDDLAGAAVWGLVRSAQAEHPGRLVLLDVDDPKELGSVPLAAALASGEPQLAVRGGRVLSARL
LC208004	neomediomycin B	M1	BKR	M	Streptomyces sp. RK95-74	Actinomycetes	WAVVVPAGEAGGVWSAGVVRMLAERGVEVRQVELGAGEDRAAQAARLRAAVGDAAVTGVVSLLALGGDEGLLRTAVLTQALGDAGVGAPLWVATRGAVSVGRSDGAVSPVQAQMWGLGRVAALELPERWGGLVDLPETVDERALTRLAGVLAGATGEDQVAVRGSGVFGRRL
LC208004	neomediomycin B	M10	AKR	M	Streptomyces sp. RK95-74	Actinomycetes	WLTVVPASHADDPRVAAVADDLARRGVRVVRVELDVADTDPHALAARLASAEGPVAGVLSLLALDERPHPEHPAVPVGLALTAALAEALARQGDGTTARLWCATRGAVSTGGADRLDSVTQAQIWGYGRVVALEQPGRWGGLVDLPETLDARALDRLAGVLAGSDDEDQVAIRAAGAFVRRL
LC208004	neomediomycin B	M11	AKR	M	Streptomyces sp. RK95-74	Actinomycetes	WLVAVPADRADDAWVAAVTDDLARRGVRVVRAELDAADADVELLADRVALAAADGPVAGVLSLLGLDERPHPEHPAVPVGIALTGALVEALDQQDGYASARLWSVTRGAVSTGGADRLDSLTQAQFWGFGRAVGLGWPERWGGLVDLPETLDGRALDRLAGVLTGVSGEDQVAIRAAGVFVRRA
LC208004	neomediomycin B	M12	EDH	M	Streptomyces sp. RK95-74	Actinomycetes	WAVLGSDDLVRDAAGVGADVAAYADLTELTAAIESGAAVPRVVLAAPSARGGTDAAGAAHRAATEALALVRAWLDDERLADARLAVLTSGALAAEAGEPVTDLAGATVRGLLRSAQSENPDRFVLIDVDGRQDWPAALPAALDSGEPDIAVRQGALRIPRL
LC208004	neomediomycin B	M13	BKR	M	Streptomyces sp. RK95-74	Actinomycetes	WLVVAPADGADDVWAEGAVRTLSARGAEVRRVELTAGDRTGMAERLREAVADAPVAGVFALPSLAGGADGLLRTAALAQALGDLGVAAPLWVATRGAVSTGRSDGPVDPWQARVWGLGRVAALELAERWGGLVDLPETADDRALSRLAGVLAGGNGAEGEDQVAVRASGVFGRRL
LC208004	neomediomycin B	M14	0DH-BKR	M	Streptomyces sp. RK95-74	Actinomycetes	FAVVGGDDLKLSVALDAAGHTATVHDDLVALDAADGTAPDTVLVPFLPETGTDRSDGLVADAHAATHRALGLVQEWLNGGRPGSARLVLVTRGAVAAAGDTEVTDLVNAPVWGLLRSAQTENPGQFVLLDVDGEVSYPAIAAALDSGEPEIALRAGAAYAPRL
LC208004	neomediomycin B	M15	C2KR	MM	Streptomyces sp. RK95-74	Actinomycetes	WLLVAASTDDAWTAAVTGALTGRGADVQQIVVDPGTDGREELAERLRTAHTEAGGDFTGVLSLLAPAGDAHPLHPSLPVGTAAQLALIQALGDAGIGAPLWCLTQGAVSTGGADRPECPEQALVWGLGRVAALEHLERWGGLVDLPQAPDEQALSRLMGVLAADHDEDQVAIREAGVFGARL
LC208004	neomediomycin B	M16	BKR	M	Streptomyces sp. RK95-74	Actinomycetes	WLVVTPAGHTGDPWASEPIRTLTERGAHVHEITVDGTTADRAGIAEQIRAALTPAEGPSRTPRADGVLSLLGLDERPHAEHPTLTAGLAGTLALVQALGDADIDAPLWAATRGAVSVGRSDRLTSALQAQIWGLGRTVAHEHPERWGGLVDLPPVADARALGRLADVLAGLGDEDQLAVRPQGIQVPRL
LC208004	neomediomycin B	M17	EDH	M	Streptomyces sp. RK95-74	Actinomycetes	WAVLGTDALGLGGTAYADLAALAEAVASGTAPSPEYVVVAPSTSADGDDVAVGAHRAAAEALATVQQWLDEERFGDAPLVVVTRGAVAADADEPVADPAGAAVWGLLRSAQSENPGRFVLVDVDGLDESARALPAAVASGEPQLALRAGVVSTPRL
LC208004	neomediomycin B	M18	EDH	M	Streptomyces sp. RK95-74	Actinomycetes	WVTLGADADFTAAGERLEDYPHLTALTDALDGSAPEVVFVPLTGGGATSLPEAAKAAARDALDLVQKWLADQRFADTRLVFVTRGAVAARPGEDVSDLARTTVWGLVKSAQSENPGRFTLVDLDGTDASQRALPTALATDEPQLALRSGTAHAYRL
LC208004	neomediomycin B	M19	EDH	M	Streptomyces sp. RK95-74	Actinomycetes	CVLLGSDVHGLAQRFDTYPDLDALAAAVASGDVAMPGDVLVTVAPEGDGDPAAVRRATAEVLELVQAWLNDERFADARLVLLTSGAVAAGADEPVTDLAHATVWGLVRSAESENPGRFVLVDVDGADDSRAAVAGALASGEPQVAVRDGVLRAPRL
LC208004	neomediomycin B	M2	EDH	M	Streptomyces sp. RK95-74	Actinomycetes	WAVLGADAEQLAALEGAFGPGVRVAAYGDLPALSAAVDAGVSVPDTVVLAGLGGVADADASAVHEATQDMLAVLQSWLADERFAGSRLVLLTLGAVETVPGAGVADLSQAAVRGLFRSAQSENPGRLVLLDVDEGSHGSVPAALGVDEEELTLRGGAVLAPRL
LC208004	neomediomycin B	M20	EDH	M	Streptomyces sp. RK95-74	Actinomycetes	WAVLGSEALCGAGVAPYADLDALGAAVEPVDEVIVDFTSLEGEGGPAAVHQATARALELVQAWLNDERFADTRLALLTSGAVATRADEPVADLAGAAVWGLLRSAQSENPGRFVLVDVDGASDPRTALSGALASGEPQVAVREGALRAPRL
LC208004	neomediomycin B	M21	EDH	M	Streptomyces sp. RK95-74	Actinomycetes	WAVLDGTGGGDLKITAALADTATGIEAETYPDLSALAEAVEAEGIAPDVVLVPCLPDLGTPGDTVGAAHTVVRRTLALVQEWTADERFADSRLVLLTRGAVAVTTGDDTGAESVDDLTHAAAWGLVRSAQAEHPGRFVLVDVHGGPADGAADGWLPALVAALRTDEPQLAVRAGTVHAPRL
LC208004	neomediomycin B	M22	B2KR	MM	Streptomyces sp. RK95-74	Actinomycetes	WLLVVPEAAAEGEWATGAVRTLAERGADVRQIVVGTGTDDRAALTERLRADTEAADGADGAPYSGVLSLLALDGRPHPVHASVPAGVAAQLALVQALGDAEIGAPLWSATRGAVSVGRSDLLDTPEQALVWGLGRVAALEHGERWGGLVDLPGAADERALSRLVTALAGAEDEDQVAIRATGLLARRL
LC208004	neomediomycin B	M23	B1KR	MM	Streptomyces sp. RK95-74	Actinomycetes	WLLAVPESAATDDWTLGVVRTLAERGADVTQITPAAVEADRESLTRLVREELADAGTVSGVLSLLAFDERTAPGTDGVGAGLTGTAALIQALGDAGVEAPLWCATRGAVSVSGTDRPESPEQALVWGLGRTAALEYPQRWGGLVDLPETPDDRALSRLVNVLAGADGEDQLAVRAAGVFARRL
LC208004	neomediomycin B	M24	EDH	M	Streptomyces sp. RK95-74	Actinomycetes	WALLGDDSPELAAALPTAAGYTDLAALGEAVTGGAAVPQAVVAPFFAADSGLSEQAAVRDVLHRALELVQGWLADDRFEGSRLVIATRGAVATAADADTEDLAHAPLWGLLRSAQSENPDRFTLVDIDGDDASYRALAAALATGEPQLAVRAGSVVVPRL
LC208004	neomediomycin B	M25	ER	M	Streptomyces sp. RK95-74	Actinomycetes	WAVLGDGAPDALTSGASVHADLAALGGAGAPDVPEYVLAYLDPRGADDEVAGAVHTATQEALSLVREWLADDRFAASRLVLVTRGAVATAGDAGTYDLPHAPVWGLVRSAQSENPDRLVLVDLDGTDASYEALGAALASGEPQFVLRRGAVHAPRL
LC208004	neomediomycin B	M26	EDH	M	Streptomyces sp. RK95-74	Actinomycetes	WAALGTAALGLPVYEDLAALTADSDAGKEAPEYLVVSLEDAPLAARPALEDRGPGRSPGGVQGAEAPSPATTAQQTTTHVLDLLQTWLAEDRFEHSRLVVLTDATDLAHAAARGLVRSAQSENPDRLVLVEADGEDTSLKTLATAVATDEPQVAIRNGEIRAPRL
LC208004	neomediomycin B	M27	EDH	M	Streptomyces sp. RK95-74	Actinomycetes	WTSVGPNTPYPDLATLAESLEAGTEPPKYVVVSLEDAPIAARPALEDRGPGRSPGGVQGAEAPSPATTAQQTTTHVLDLLQTWLAEDRFEHSRLVVLTHATDLAHAAARGLVRSAQSENPDRILLVDTDSHADSRDALPTALASGEQEVAVREGTVKTPRL
LC208004	neomediomycin B	M28	EDH	M	Streptomyces sp. RK95-74	Actinomycetes	VAVVGPEVPGLGVDAETYPDLAALAEAIESGSASPAHVVVSARTAPGENPSTAAMAHETAVRVLALLQEWLAEDRFVDARLVVLTQGAVATGADDTVTEPAQATATGLIRSAQSENIGRVILVDLDDDPDSLAALPAALESGEQELAVRQGTVMTPRL
LC208004	neomediomycin B	M29	EDH	MM	Streptomyces sp. RK95-74	Actinomycetes	VAVVGPDVPGLGIEAETYPDLTALAEEIATGATAPDHVIVSLAPHATSGEVSSPVAMAHESAVHALSGLQTWLAEDRFADARLVVLTQGAVATATDDPATSLAQTTVTGLIRSAQSENPGRVILVDLDGHPDSLAVLPAALDSDEQELALRQGAVKAPRL
LC208004	neomediomycin B	M3	BKR	M	Streptomyces sp. RK95-74	Actinomycetes	WLVVVPAEVAEDTWVAGVVGMLSDRGVEVRQVVVAADEDRGAVAARLTTAVGDEAATGGVVSLLALADGGDGLLTTAVLTQALGDAGVGAPLWVATRGAVAVGRSDGAVSPVQAQVWGLGRVAALELPERWGGLVDLPETVDERALVRLAEVLAGVGGEDQVAVRASGVFGRRL
LC208004	neomediomycin B	M30	EDH	M	Streptomyces sp. RK95-74	Actinomycetes	WAVVGQQAAEHGTDAFGLVTALESAGAECAVFPDLAELAAVVASGSARPDVVLLPLTGPAGGGGAHLAEGARLATHEALESAQAWLAEEVFAGARLAFVTRSAVATSPDARVNDLPHAPVWGLIRTAQTENPDRFLLLDLDQGETSSDALMAAAAGGEPQLAVRGGALHAPRL
LC208004	neomediomycin B	M4	BKR	M	Streptomyces sp. RK95-74	Actinomycetes	WLVVIPAEAAENTWVAGVVGMLNDRGVDVHVVELDAADRAGAADELRTVVGDVAVTGVVSLLAVGADGAALSRTTVLTQALGDAGVGAPLWVATRGAVAVGRSDGAVSPVQAQVWGLGRVAALELPERWGGLVDLPETVDERALVRLAEVLAGVGGEDQVAVRASGVFGRRL
LC208004	neomediomycin B	M5	BKR	M	Streptomyces sp. RK95-74	Actinomycetes	WLVVVPAEVAEDTWVAGVVGMLSDRGVEVRQVVVAADEDRGAVAARLTSAVGDEAATGGVVSLLALADGGDGLLTTAVLTQALGDAGVGAPLWVATRGAVAVGRSDGAVSPVQARVWGLGRVAALELPERWGGLVDLPAEADERALARLAEVLAGVGGEDQVAVRASGVFGRRL
LC208004	neomediomycin B	M6	EDH	M	Streptomyces sp. RK95-74	Actinomycetes	WAVLGADAGQLAALDDAFGNGIRLAGYGDLAALGTAVDAGAAVPETVLLLGLGDGDDASAVHEATQGMLAVLQSWLADERFAGARLVLLTRGAVETVPGAGVADLSQAAVRGLFRSAQSENPGRLVLLDVDGEDSSYGSVPAALGVDEEELTLRGGVVLAPRL
LC208004	neomediomycin B	M7	BKR	M	Streptomyces sp. RK95-74	Actinomycetes	WLVVVPAEATGSAWVAGVVGMLNDRGVDVAQVVLAADEDRAAVAARLTSAVGDEAVAGVVSLLALAEGDGLLTTAALTQALGDAGIGAPLWVATRSAVAVGRSDGAVSPDQAQLWGLGRVAALELPERWGGLVDLPETADDRALARLAEVLAGVGGEDQVAVRASGVFGRRL
LC208004	neomediomycin B	M8	AKR	M	Streptomyces sp. RK95-74	Actinomycetes	WLVVEPAGSADRADTVRRVVDALADRGADIRRVTPADAGDLDRAALADRIGRAAADEQVSGVLSLLALETGPHPDHPAVPTGLLRTGVLVQALGDAGLDAPLWCATSGAVATAASEPLGSAAQAQIWGLGRVVALEHPERWGGLIDLPATLDERAADRLAGVLGGHGDDHEDQVAIRTAGVLARRL
LC208004	neomediomycin B	M9	ER	M	Streptomyces sp. RK95-74	Actinomycetes	WAVLGAGAPAALTAGAAVHADLAALNDAVEAGRTEAPEYLLAYFGPRDTTEDDVAGAAHTAAHDALALVRAWLAEDRPGTSRLVLVTRGAVTAGGDAGVDDPARSAVWGLVRSAQSEHPDRLVLVDVDGTDASYEALGAALASGEPQFALRRGTVHAPQL
looekeyolide	lklA	M2	CMT-B1KR	M	Roseofilum reptotaenium AO1-A	Cyanobacteriota	WLILADPEGIGQHLATHLRSVGHSCTLVFPGEHYQKIGAAEFILNPHHPLEFGQMMTEIVQQSSLYGVVQCWTLERGDILQREPLNEWLKSGCGATLSLVQELVKLENSQPPKLWVVTQGVQPLPEPEPLLSGLAQSPVWGMAKVIDLEHPELNCVRVDLDPTEPVENQALNLLDELHSRESENQVAFRGQRRYVSRL
looekeyolide	lklB	M3	AKR	M	Roseofilum reptotaenium AO1-A	Cyanobacteriota	WLIFVDDRQSLSDSLRTLLREKNKNVSWIYKGSGYEQIEENEYKVNPEHLQDFEDLLENLKLAGREDFENILYLWSLDTPPTEKLNLERLKVAQDFGCGGVLHLVQALLKGTSLGKLWIVTRGAQSVSLTPERVNVATSPLWGLGTVLSLEHPQLWGGLVDLNGEKQEDEGQKLWHLIDNLEKEDRLAVRGEQIYYSRL
looekeyolide	lklB	M4	CMT-C1KR	M	Roseofilum reptotaenium AO1-A	Cyanobacteriota	WLIFADRQGLGQALAKTLDSRQENYRLVVPGEGINPQNPQEFEDILTSLSLSSSTQTHVVYLWGLDSPGLEQMSPEAIKENLSWHTQSLLYLVQSLSRLKRISSCRLWIATQDSQPVVPDSSLSGLAQSFLWGMGLTISLEHPEFWGGLIDLDPQVSWDELSQILRTEIDTSEGEDRIAFRGQSRYVQRL
looekeyolide	lklC	M5	OMT-AKR	M	Roseofilum reptotaenium AO1-A	Cyanobacteriota	WLILADGNGFGKRLKGLLEKQGQQCTLVYPKGQTQHKEPEDWEVNPLNPQEFTDLCQKLGATHPEDWRGMIHLWSLESPTPENLSEEQLRNAQNLGCGSALHLLQGLLKSGLKRNWPKLWLVTQGSQPVGENPKNLAVAQSSLWGFGQVVSLEHPHLWGALVDLDPETDRMELLLAELLNPTAEDRIAFRSGQAYVARL
looekeyolide	lklE	M6	CMT-B1KR	M	Roseofilum reptotaenium AO1-A	Cyanobacteriota	WLIFADRAGVAQSLAAQLEEIAATCILVGMGEDYQQIAPKQWQINPHNPQDFRKLMAEVAIEFPQLSGIIQCWTLEPPTDSNLSLEDLNRLSELGCGTTLSLVQAIIEQERFSPQLQIVTQGSQSALHHGGQPPGIAQSSLWGMAKAIRLEHPELSCRVLDLDPQTSLEEQATSLLQELGSSDSEDQVVWREQLRYVPRL
looekeyolide	lklF	M7	OMT-BKR	M	Roseofilum reptotaenium AO1-A	Cyanobacteriota	WLILANKPEIRQPSAPFLSDSCIWVSPGLTYQQLEDRDYQINPQEPDHFHQLLKAVNRPESPLQGVIHLWSVQTSIDELDASQELSCLSTLYLVQALVSQTQWSGRLLLVTQGAQAVDRDSWVQNPQQASLWGLGKAIALEHPELQCQCIDLDPKIEVSQSLPFLATELCHPDEENQIAFRNRVRYVPRL
marinolide	mldA1	M1	C2KR	MM	Streptomyces sp. AJS327	Actinomycetes	WMLLCAEEDANSSHVTGVRDVLTRDGARARTVTVPRGVPERETLTELLTRDGVPGTETPAGILSLVSGRVEPTGTASELAATQLALTQAVADLPQPVRLWTVTSGAVGIGGDDAAPDPARAAVWGLGRVFGLEHADRYGGLLDLPAEWDERIGDQLAVALNDGTEDQFAVRQHGLFVRRL
marinolide	mldD	M10	A2KR	MM	Streptomyces sp. AJS327	Actinomycetes	WRLICRDSDQVSDVKAALEQVGAEVEVRVLPAQPDRASVAELLSGAEHVACLTQGVDEPATALTVMQATVDLGSPCRLWFLTRGAVATPGSDVVPDPSQAAVWGLGRVFGLEHPDHYGGLVDLPTVWRSGTDGQLVAALTHPVEDQIAVSAGGVFVRRL
marinolide	mldD	M11	A2KR	MM	Streptomyces sp. AJS327	Actinomycetes	WLLVCHDSAEAADVQRALEQAGAEVELRILPNDSDRDGVVQLFSGAKHIAYLPSGFDRDHPEHAGLPAGLASVLTAVQAAVEQTGARLWMLTRGAVSTPGADAAPDPAQAAVWGLGRVFGLEHPDHYGGLIDLPTTWQAGTGSQLAAALAESVEDQIALRTVGVFARRL
marinolide	mldF	M12	AKR	M	Streptomyces sp. AJS327	Actinomycetes	WAVVTRDGDDASDIVAAVCRAGGHPVVVSLPVGGSPEEFAARLAEACADAPPVRGAISCLALVDGAREEVSPDRLLETVTDTVALIRALDGAAADVPLWCLTQQAVSMADDDPVADPAGALVWGMGRVAALELPSVWGGLVDLPVSADDTAYDRVCRLVAGADREDQVAVRPTGMFARRI
marinolide	mldF	M13	ER	M	Streptomyces sp. AJS327	Actinomycetes	AAGYVLAEPDVAALSGVAGEGAAEPEWVVLPCRASGDGSVPERARALTAWVLGQVRSFLEEPTLVGRRLVVLTRGAVATGEDDRDVDVSAAGVWGLVRSAQSEHPDRLVLLDVDAEVAGEEWPAVLSALSGTAATQFARRDGVLLTPRL
marinolide	mldG	M14	C1KR	MM	Streptomyces sp. AJS327	Actinomycetes	WLLVCAEGRSGAPEVIALAAALGEESGSARVVAVPTGRVGPEELARVLDGVVPAERPVGMVSLLDGEAAVGLLRAVGAVSCEARLWQLTSGAVGVGGGDVVNDPTAAGLWGWGRCFALEHPDRWGGLVDLPDAVDEGVVARVTAHLTRDGGEDQVAVRAEGAFGRRL
marinolide	mldG	M15	EDH	MM	Streptomyces sp. AJS327	Actinomycetes	CARLTAGGAGATAHPDLPALRSAYADGAVPAVVLLAPGTPARPAPPTVADVHEAMVHQLTLLRAWLDEERFAATRLVVTTRGADTADPTAAAVWGLYRSAQAEHPGRFTLLDLDGDVLPRALVEAVASGAPQLTVRAGAVLEPRL
marinolide	mldA2	M2	EDH	MM	Streptomyces sp. AJS327	Actinomycetes	AVVGPDADQRRAVARGLGIGSSQHTDLDALARAIDEDTARPELVVVPLPMTAATPGDPTAEAVHRTTAHVLDLLRRWLDEDRFARARLVLLTRNAVAVRSGEPAADLAAAAAWGLVRSAQTENPGRLLLADVDDPAALGRALPALLHADEPQYALRAGQLHTPRL
marinolide	mldA2	M3	0DH-B1KR	MM	Streptomyces sp. AJS327	Actinomycetes	YAVLDAAENKLAEALRGQGTVTERYTGLTELAAATDATPGDVPHNILVPVAPTDPSSPTATRTEVTRVLRLVRSWLADERFTATRLVLVTRFAVATDGGGVADLTGAAVWGLARTVQAEHRDRIVVLDLDERDESLRALPGALAADQPQAALRAGALFVPRL
marinolide	mldB	M4	BKR	M	Streptomyces sp. AJS327	Actinomycetes	WLVVGHEGGETARLVEMVGRAGARAEVLTVEPGTDRALLADRLRAMSADGEPLAGVLSALTLPGGRPLDHEVSLADSLALLQALGDVGVGAPLWCLTSGAVGTGGTDTVCEPEAAAVWGLGRVACLEHPDRWGGLVDLPSLPDELAYRLLALVLSGATGEDQVAVRDAGLFACRL
marinolide	mldB	M5	AKR	M	Streptomyces sp. AJS327	Actinomycetes	WLVVAPSGSDSEPVTASALAALTRCGAHPQLLTVDPADTHADTALRTALTATDHPPAGILSLLPLDRRPHPGRPELTAGLTGTVLLTRTLAETDSEARLWCVTRGAVAADRITPVNDPAQAQIWGLGRVAALEHPRHWGGLADLPSEPDDTSYDRLCAVLAAGTREDQVAIRPTGVLGRRL
marinolide	mldB	M6	ER	M	Streptomyces sp. AJS327	Actinomycetes	FALVGEGWHSGVDAALSAVESGADVPSWVILDLPDGGDSGTVPERARTATEWLLGQLQAFLAAPALADARMLIRTRGAVITGPGDRDVDPAVTAVWGLARSAAAENPDRIHLLDTDTTGSPGNPGITGSADSTDATDARDGSVLARPTGPTGSVVGAEAAGGEVGVRELLTAVEAAGREQLALRGGVLLAPRL
marinolide	mldC	M7	EDH	MM	Streptomyces sp. AJS327	Actinomycetes	TVVLGDDLPNWPGADRLPPLTDPQEGQSVWDVLPDPAPDHTILISTSGDAEPDEDVPDNARAAVVRALHLIQAWVADERLAGSRLVLATRGAVEALPGEGVTDLAGAAVWGLARSAQSEHPGQIVLLDLDDTDIAPELLRAALATGEDQVAIRGGNLHTPQL
marinolide	mldC	M8	A1KR	MM	Streptomyces sp. AJS327	Actinomycetes	WLLLCHDEGDGTGVRAALEQAGAEVEVRVLPVEPDRASVAKLLSGAEHVAYLAAGFDRTCPGHPALSVGIISVLAVVQAVVEQPDARLWLLTRGAVATPGSDVVPDPSQAAVWGLGRVFGLEHPDHYGGLVDLPTVWRSGTGGQLVAALTHPVEDQIAVSAGGVFVRRL
marinolide	mldD	M9	ER	M	Streptomyces sp. AJS327	Actinomycetes	WVLVGDARDGYADLAALAQALPDGAESPSLVVLSTCGDTGRVEAGEDGAARAESMVVRLLGEIQEFLASPKLNDARLLVLTRGAVTTEDPLHPVDPAMSAVWGMVRSAQTEHPERFLLLDLDPQTDAADEHSLLERMLPAVRSGELDQLAVRGGELIAPAL
meijiemycin	mjmA	M1	EDH	M	Streptomyces sp.	Actinomycetes	WAVAGPDAWGLADALRAAGETVVDEATEPADVVLVPVAAPAVAAAGDDALDAVRAATSAALDRLQRDLRDTGGPENTPAVVFATRGAVATDADASPDLAGAAVWGLVRSAQHESPGRFVLVDLDGTDAPATARLLRAALELDEPQLAVRVGRLLAPRL
meijiemycin	mjmB	M10	CKR	M	Streptomyces sp.	Actinomycetes	WLLIVPAPDEARVVDEEWWAAVAEMLGREGSGTVRIEVADADRAALAARLGEMRERFAGVLSLLALGRTGPEATALTCALIQALGDAGIEAPLWCATVGAVRVGRGDAPADPRQAAVWGLGRVAALEHPERWGGLVDLPGSLDQRARARLTAVLAGGAGDPAEDQIAVRAGGVFGRRL
meijiemycin	mjmB	M11	BKR	M	Streptomyces sp.	Actinomycetes	WLAVVPAGHAEDPWVNAVVEALGTETVRLEVTGPDRAALAERLRAQMAEGPRPVGVVSLLAVADSTGPVVPPGLALTAVLVQALGDAEVGAPLWCVTRGAVSVGRTERVADPRQAAVWGLGRVAALEHPQRWGGLVDLPEELDGRIATRFAAVLARTGGTEPAEDQVAVRASGVFGRRL
meijiemycin	mjmC	M12	BKR	M	Streptomyces sp.	Actinomycetes	WLAVVPEGLAEDPWVCSVIAALGAGAVRLEVGDTDRTALVARLREVVADAGAPEGVVSLLALLESATAERPAVPAGVALTTSLLQALGDAGVDAPVWAVTRGAVSVGRSERVTSAVQAAVWGLGRVAALEYPQRWGGLVDLPETVDGRVASRFAAVLAGFEGEDQIAVRRSGVFGRRL
meijiemycin	mjmC	M13	0ER-0DH-BKR	M	Streptomyces sp.	Actinomycetes	WAVLGTDAWDLAAVLESAGVTRNTTPVRALADLAGPEGAGVPQIVVAPLMGEPLIGAPLMGDDPARGPESVRELTHHALELLRHWLAEERFARSSLVFVTRGAVADADQDITDLAAAAVWGLVRSAQSEHPGRFLLVDLDDSAESAAVLPALPGLLDAEEPQAVVRAGAVRVARM
meijiemycin	mjmC	M14	EDH	M	Streptomyces sp.	Actinomycetes	SVDGTEGAPDAVVVPISGGAHGGEGGPDTVADTARALTSTALRLIQDWSADDRSARSRLVFVTRGAVAAEDGDAVLDPAAAAVWGLVRAAQVENPDQFVLIDLDEKENATAAIPAVLASGEPQAVIRDGAVRVARL
meijiemycin	mjmC	M15	ER	M	Streptomyces sp.	Actinomycetes	GTGLNTVELTADEASDLAVLETVPDVVTVVAGSAGAHDVVPSVHEETARVLGLIQEWAADDRFAHSRLAFVTRGAIAVDEGTPVTDLAGAAVWGLVRSAQAEHPDRFLLVDVDEREASMSALPVALGSGEPQVVVRDGAVRVGRL
meijiemycin	mjmE	M17	ER	MM	Streptomyces sp.	Actinomycetes	SDALDIVELTAEQATDPASLATVPEVATVTWQSADFSSAAEAVHAETARALRLVQNWLADERLQGSRLVFVLRDAVAVESPDMVAAAVWGLVSSAQSENPGRFVLVDAASPDEVRTALASGEPQVLVRDGGVCVGRL
meijiemycin	mjmE	M18	0ER-0DH-B1KR	MM	Streptomyces sp.	Actinomycetes	QPADGPETVELSADALAHLASLETVPDVVMVEVGALGATGPVGRPEASDGEGATHQVTARVLELVQHWAADERYADSRLVFITRGAIAARSGDTVADPRAAAVWGLLRSAQTEYPGHFLLADLEDRQQAAEVLADVIASGEPQVVVRGGVVLVGRL
meijiemycin	mjmE	M19	A2KR	MM	Streptomyces sp.	Actinomycetes	WLVVTADGIADGEVTAALAGHGAQVRRLELDESCVDRAELASRLQGVDGIEDIRGMVSALAFAEQPSATYPALPSGLALSLALVQALDDIGADAPLWCLTRGAVSTGRSDRLTNPVQAQVLGLGRTAALEHPRRWGGLVDLPAELDQRAAQRLAGALAGTEGEDGEGEFAIRPSGVFVRRV
meijiemycin	mjmA	M2	EDH	M	Streptomyces sp.	Actinomycetes	LAVVGPDPLGLVGALEAAGHTVRPYADLADLIQVVGDEDVAPGAVLLPLTVAADVPAAADAVVASAHRLSAQVLTYLQTWLAEEERLAGSRLVFITRGAAGVPPGAHDVAAATVWGLVRSAQAEHPDRFVLADLDARPESAAALPGALGSAEPQLVIRDGAVHVGRL
meijiemycin	mjmE	M20	AKR	M	Streptomyces sp.	Actinomycetes	WLVVVPADQIVPADQADVAWATAVADATPTPAVRVEITEPDRAALADRLREVAAESGPFAGVLSLLGAYEHAADGHPGVPAGVALTTTLVQALGDAGIESPLWAATRGAVSVSRSDTAPSPAQAAVWGLGRVAALEYPGRWGGLVDLPGTLDRPAGRRLAAVLSGAGDEDQIAVRSSGLFGRRV
meijiemycin	mjmE	M21	B1KR	MM	Streptomyces sp.	Actinomycetes	WLVVVPQGLADDPWVSALADAVGADAVRLEVGDADRAALADRLASYVADRVGGVDGADGADGAEFAGVLSLLALSESALPEYPSVPAGVGLTATLMQALGDAGIEAPVWAVTRGAVSLGQSDRATAPLQNAVWGLGRVAALEYPRSWGGLIDLPADLYDRIIGRFAGALAARTGEDQVAIRSTGVFGRRM
meijiemycin	mjmF	M22	EDH	M	Streptomyces sp.	Actinomycetes	WAVIGPSGAALADLADAVDEGAPAPAYVLVDRPAPPGDLPAAVREALYDTLELVKEWLADERFAASRLVMVTRAAVSVRPDEDVVAPALAPVWGLLASAQAEHPGRIVLADLADLADLADLSDLTDLADLTGADGGPADVAALRAALASGEPRIAVRGGEVYAPRL
meijiemycin	mjmF	M23	ZDH	M	Streptomyces sp.	Actinomycetes	WVGWDVVADEGAESEVVVLDCGGAVGGGVPLVVRSVVDRVLGAVRGVLVGGSRLVVVTRGGVAVSSGEGVVVSQAPVWGLVRAAEAENPGRFVLLDLAEGEDVAGVLPSVVASGEPEVAWRKGEALVPRF
meijiemycin	mjmG	M24	ZDH	MM	Streptomyces sp.	Actinomycetes	WVGWDVVAAEAEGAESEVVVLDCGGAVGGGVPLVVRSVVDRVLGAVRGVLVGGSRLVVVTRGGLRCLRGRGWWCRRLRCGGWCVLRRRRIRGVLCCWTWQKTRMWRGCCRRWWPAVNPRW
meijiemycin	mjmH	M25	AKR	M	Streptomyces sp.	Actinomycetes	WLAVVPARYAEDAWVTSVLAAVGTDAVLFEVDEPGNGETDRTALARRLAEVATSTDGAGFAGVLSLLALGESPGAEHPAVPVGLAQTVALVQALGDAGIEAPLWCVTRGAVSIGRSDRVASPVQAQVWGFGRVAALEHPRRWGGLVDLPEDVDRRAARRLAGVLAAGPVGDGMGDGDGDGNGEDQVAIRPSGLFGRRL
meijiemycin	mjmH	M26	EDH	M	Streptomyces sp.	Actinomycetes	VGAVADGATDVVELTDATAAGLAGLAAPAAPESVPDAVSVAIGSPEFTDVAEVHRAVAQVLELVQTWLAENRFAHSRLVFVTRGAVADDDGVPVTDLAAAAVWGLVRSAQSENPGRFVLLDLGAEAGAPSEGHDVLSAHLPTLLASGEPQGVVRDGELRIGRL
meijiemycin	mjmA	M3	EDH	M	Streptomyces sp.	Actinomycetes	VAVVGPDDGGLVEGLRTTGAAVVGCEDLAALAAGEDAPPAVVLMPVSGPEGDVVGATHEVTSRILGVLQTWLADERWTRSRLAFMTRGATTGDDLAAASAWGLVRVAQSEHPDRFALLDLDGGQPSAAAVAEALGSDEPQTAVRDGAVLAGRL
meijiemycin	mjmA	M4	EDH	M	Streptomyces sp.	Actinomycetes	LAVVGPDPLGLVALVEEGGAGAETHTDLASLAAVSEAAAPDIVLVPVVGGDSGSPVVESVRTTTTSVLGQLRTWLAEERWADSRLVFVTRGATAAGDLAAAPVWGLVRSAQTEHPGRFGLIDLDPQPGATADRALDGVRTPGSLLLEALASAEPQLALRDGAIRAARL
meijiemycin	mjmA	M5	EDH	M	Streptomyces sp.	Actinomycetes	AVVLGPERSWLTEALRAAGTPVEVCVDIAGVTSPPTGSDVPEVVLVPVGDGTPEDPATPEDPVRSAHQAAAWALRLAQSWLADEGAAASRLVFVTRGATTGDDLAAASVWGLVRSAQTEHPGRFGLVNLDETDASVAALRQAVASGEPQSDVRVGAITVPRL
meijiemycin	mjmB	M6	EDH	M	Streptomyces sp.	Actinomycetes	VVVLGPDVLGLAETLRAVGAEARVHDDPADLTDPAALTGPDGVSPGTVLVPVLGDTAGEMADAVRTLTSRALELLRVWSAEEGPAGTRLVFVTRGAVAADRGAAASGESRGEDAGAPVDLAAAAVWGLVRSAQAEAPGRFTLVDLDPEDPSTVLPASTLTADEPQLAVRQGTVLAPRL
meijiemycin	mjmB	M7	AKR	M	Streptomyces sp.	Actinomycetes	WLVVTADGAPDDPFQDDVVDALGIHGARVHRVVLDDTCADRAVLAARLGDVQAAVQGDAADGVRLDEVSGVLSLLAVAEHPAPAHPALPAGLALTVALVQALGDLGVTAPLWNATRGAVSTGPSDPVARPLQAAIWGLGRAAALEHPGRWGGLVDLPEVVDRPAAQRLMSVLAGSTEPASAHHDEDQVAIRATGVSARRL
meijiemycin	mjmB	M8	A2KR	MM	Streptomyces sp.	Actinomycetes	WLVVTAEGIADGEVTAALAGHGADIRRLALDESAADRAVLAARLSDVTSPSEDDSPGIAGVVSLLAAAEEPHSDHPELATGLALTVALVQALGDARIEAPLWCLTRGAVSTGRSDRVVSPVQAQVHGVGWTAALEHPDRWGGLVDLPETFDQRAAQRLAAVLAGATGEDQLAIRASGVLARRV
meijiemycin	mjmB	M9	BKR	M	Streptomyces sp.	Actinomycetes	WLVVAPPGAAEDTWARAVLDGLGAPTVLVESAAEDRATLAELLGQADTEGPGFSGVLALPAHHTPGDEGDPATAAARAATVIQALGDAGIEAPLWCLTRGAVSIGRSEPVLDPAQAAVWGLGRVAALEHPERWGGLVDLPADPDPKAVRRLAGVLERTGGEDQVAVRASGAYVRRL
micromonolactam	PKS1	M1	ZDH	M	Micromonospora rifamycinica	Actinomycetes	WVVLGDERIGTAIRHADPAALGAAIDAGATAPEWAFVGVTTGDVRAATADALALLQQWLADARLAGTRLVFVSRVDDLAAEAVRGLVRAAQTENPDRFVTVQLTDAPTSLLTAALATGEPELRLRDGGISVPRL
micromonolactam	PKS5	M10	EDH	M	Micromonospora rifamycinica	Actinomycetes	WAWHPDTTRTGGPSTTATGPGAGDSPTSGPAGLVVVRAGGTDDVHAEVNRVLGIVQHRLAGDDTAPLVVLTRYAVGDDVTDLAGAAVWGLVRSAQAENPDRFLLVDAHTDRLDDVLPLALATGDPQVLVREGVVRIPRI
micromonolactam	PKS5	M11	EDH	M	Micromonospora rifamycinica	Actinomycetes	WALVGVDEFKVSAALDTVGLRAETHPDLAALAAALDAGGAVPDVVLVASVQPDSRDLAAGARHTTGQLLTLLQGWLADERLASSRLLVLTRGAQGTPVTEPAAAAAWGLVRSAQSENPDRIVLVDLDDHDESAQALPAVLAGGEPQLVVREGVAHAARL
micromonolactam	PKS1	M2	EDH	M	Micromonospora rifamycinica	Actinomycetes	WAYLEELADEAPELVLTRLADPSAAPADVESASRATVAAVLGLLQRWLADPRSTESRLVVLTSGAADGVTDLVQAPVWGLVRAAQAENPGQFVLVDAAPETPVEQIVAAVGTGEPELSVRDGQVRVPRL
micromonolactam	PKS1	M3	EDH	MM	Micromonospora rifamycinica	Actinomycetes	WGYLEGIGLGVPDVVLAPLTPAGDDPDRAAAAHRATAETLALLQSWLADPAQAAARLVVVTHGAVDGGTDLAHAPVWGLVRAAQVENPGQFVLVDADPETPVEEILAAVGTGEPELSLRDGQVRVPRL
micromonolactam	PKS1	M4	EDH	M	Micromonospora rifamycinica	Actinomycetes	TVVLGDTDLGLGVPHHPDLVALAAEVGRTGVAPQTVVVPWRAAGDSTVPATTGALELLQRWLADDRFTGARLVLVTTRAVATGEGEDVPRPVDATVWGLVRAAQEESPGRFVLVDVDGADPAGLRAALAAAAEPQLAVRPGGLLAPRL
micromonolactam	PKS2	M5	EDH	M	Micromonospora rifamycinica	Actinomycetes	WTLVDVDADLPEPGAGTVVVALDPPGTAPEAVHRDTERLLGLLRRWLTHPGYAHSTLVLHTRGAVAAGDTRVDPASAARWGLVRAAEAEHPGRFVLVDTDGTGEVDAGHLAAALATGEPEVAVRDGRLLVPRL
micromonolactam	PKS5	M9	EDH	M	Micromonospora rifamycinica	Actinomycetes	WTRHPATGSGSDLAPAAAGSDLTPVAVEVDPAVPGTADLLVLAAGLTGDLAGPEAVHDEVNRVLGLVRQWLTGPDTDRLVVLTRRAVGADVTDLAGAAVWGLLRSAQAENPDRLLLLDTDTDPAGDVTSALALALAAGEPQVRVRHGVVSVPRL
mirilactam	PKS19	M1	EDH	M	Actinosynnema mirum	Actinomycetes	AAVLGAGHADLAALGAALTSGATVPETVVYHVPVSTGDVLVDVRAALDSVLTVVRQWLADERFGPSRLVVVTRGVRDADLAHTPVWGLVRAAQAENPDRFTLVDLDDAPESAAQLLPAVATGEPELSVRDGKVSVPRL
mirilactam	PKS08	M10	EDH	M	Actinosynnema mirum	Actinomycetes	WGEVGAEAPGVVVLPIAGSADPDSARTEVHRVLAVLQTWLSENRFAASHLVVVTEGAVSVRGEAAPDLAGAAVWGLVRTAQAENPDLFLLVDLDDWTDLERALPLALASGEPQVVFRDGIGHYPRF
mirilactam	PKS08	M11	EDH	M	Actinosynnema mirum	Actinomycetes	WALLGGDDLRVGAALKAQGCEVEAHTDLAALGHATDDTAAPDVVVVQFAPGGPLDAAAVRAATHRALATLQAWLAEPRHAASRLLVLTGGAQDGSDPVNAAVWGLTRSAQSENPDRIVLVDLDGEDESARALPKALASGEPQLVARGGELRAARL
mirilactam	PKS19	M2	EDH	M	Actinosynnema mirum	Actinomycetes	VVVLDGPDLSALEQVPDWVVLPVSGQAARSTVDDVLSVLREWIADERFAAARLALVTTGGVPAAGHAVDPVVAPVWGLVRAAQAENPDRFALLDLDVALSDSPENLAGAVTTPLGLGEPEVAVRGDALLVPRL
mirilactam	PKS19	M3	EDH	MM	Actinosynnema mirum	Actinomycetes	LLVLGDALGKYVPKVPDLASIGADVPEWVVLPIGSADTSRSAVDLALATAQEWLADDRFASSRLVVLTRGGAAVGDVPVDPAVTAVHGLIRAAAAENPDRFALVDTDGWPVHWDGLLAALGSGEPEVAVRGDDLLAPRL
mirilactam	PKS19	M4	EDH	M	Actinosynnema mirum	Actinomycetes	LAVLGAPGRFPAEVAYPDLDAVAAAGPQGPDSVLVPLRTTGDDPAAAGRAAVEGLLPVLRRWAEDERFAGKRLVVVTTGAVSVDGEDSPGLAHAALWGLLRSAQVEHPDLVGVVDVDGDPASDLALPAALTAGEPQLAVRGGRAFVPRL
mirilactam	PKS05	M5	ZDH	M	Actinosynnema mirum	Actinomycetes	WAVLGQWPTTTATAHADLAALRAHLDGGAPPPEVVLAPIAPASQVSPGDVPAEVRGSTHAALALLTGWLADDRLTGSRLVVLTRAAVPADPTRAPLWGLLRAAQAENPGRFTVVDVEPGSEDLLPAAIGTDEPELALHEGKILVPRL
mirilactam	PKS06	M6	AKR	M	Actinosynnema mirum	Actinomycetes	WLLVAPEGDPLAASAAERLTARGASAVLLDPADHDRAALADELRGAEVEGVLALVALDDTPHAEHPTISDGVERVVTLVQALGDAGVTAPTWLLTRGAVAVDPFEELASTAQSAVWGLAGALGLDHPLTWGGVVDLPAEVDSAALDRLVDVLAHRVEDQVALRPAGVLARRL
mirilactam	PKS06	M7	AKR	M	Actinosynnema mirum	Actinomycetes	WLLVGPDDERVDAVADALDARGARVVQIDVAEADRARVADRVRAALGGQTPDGVLSLLGLDERPHPLSPSLSLGVAASVTLVQGLDDAGVTAPVWFGTSGAVAVDRFDRPGGLRQTALWGVGTVLGLDRPRTWGGVVDLPAELDQLTDARVLDRLAGVLSGAGEDQVAVRRSGVFGRRL
mirilactam	PKS07	M8	AKR	M	Actinosynnema mirum	Actinomycetes	WLLVVPESLREDKRVIAVVDGLTTRGADVLPVRVDGLDRAAAADLVRSAVAGGLPEGVLSLLGLDDRPHPLFPSLSRGVAASVPLVQGLDDAGVTAPLWFATSRAVGAGLEEPADPRQSALWGIGTVMGLDRPQTWGGVVDLPADVDDLVVERLVGALSGAEDQVAVRPAGTLARRL
mirilactam	PKS08	M9	EDH	M	Actinosynnema mirum	Actinomycetes	WDALGEDVPPVVVLPVSGGAEPESARAEVHRALAVLQTWLSEDRFAAARLAVVTEGAVGDAVADLAAAAVWGLVRSAQAENPDRFVLLDVPTADLARALPLALASGEPQLIWRGDALSAARL
muanlactam	muaF	M11	EDH	M	Streptomyces sp.	Actinomycetes	WRAEDDDVLSALSSLLEVLQTESGTLVVVTRGAVSVAGEDVSDLAGAAVWGLVRSAQSEDPGRFVLVDLPGAVDAVGVEAGVGLALATGEPQVAVRDGRCLVPRL
muanlactam	muaG	M12	EDH	M	Streptomyces sp.	Actinomycetes	TDLSELSGQVPATVALTLPAGTGDIADDVRAVTDHTLRALQTWLADERFTGRRLMVVTRGDDLAHAAAWGLVRAARAEDPERFALLETDRDDPETTARAVASGEPELRVLDGELLVPRL
muanlactam	muaB	M5	EDH	M	Streptomyces sp.	Actinomycetes	EPDAAAREFHLAFVPDSFPGSPVEAARTATLHALRLIQDALRDDTRLAIVTRDAPDDPALAPLWALVRSAQAENPGRFVLVGADHDAPEHELRAALSCGEPQLVLRDGAVLVPRL
muanlactam	muaB	M6	EDH	MM	Streptomyces sp.	Actinomycetes	SPTVVHRCTGGTTAEAVHAETTAVLDVVRSWLAEDRDDAVLSVVTRGAVSVGGEDVTDLAGAAVWGLVRSAQTENPGRIVLIDLDPGDPGHATADAGPLVATGEAQIAVRSGTPHRPRL
muanlactam	muaD	M7	EDH	M	Streptomyces sp.	Actinomycetes	GRTPAGDLEVLVHHCPPTDGETPAAARAVTAGVLEAVQAVLDGDAVLVVVTDGSDLGHAAVQGLVRAAEAENPGRFVLVDTDAPVEPGAVLEYGEPELRIRDGEVLVPRL
muanlactam	muaD	M8	EDH	M	Streptomyces sp.	Actinomycetes	YEAPRADGDTPEAVRTVTDAVLARIQEWLTGEHSGEEKLAVVTRRAVPAGGTDVELSQAPVWGLVRAAAAENPGRFMLIDLDDEATVPPLVDEPEIAVRGGEVLVPRF
nagimycin	nagAI	M1	ER	MM	Streptomyces sp. NA07423	Actinomycetes	WATLGDAHADDDLDALIAAEDRPDRPEAVVADTTAWATEHTDLPARARDLAARALDLVQRWVGQPELADVRLVLLTRGAVSVHDTAEVTDPAAAAIWGLVRSAQSEHPGRIALVDTDDVSREALTVAVASGEPQSALRRGLLWVPRL
nagimycin	nagAI	M2	ER	MA21	Streptomyces sp. NA07423	Actinomycetes	WAELDAVHDNGTWPPVVVADTRTYATEDGELPERARALTGRVLTAIQRLISDGGLADSRLVLLTHGGMAVHDETEVTDPAAAAVWGLVRSAQAEHPGRVCVIDTDDRSAGALPAALATAEPQLALRGGTAFVPRL
nagimycin	nagAI	M3	A1KR	MM	Streptomyces sp. NA07423	Actinomycetes	WLVAVPAPQANDDSVMGLVAALVEHGAEPVVVEVDTIDQAELTTCLRERMADRGDEYAGVVSLLAWDERSCEPGTLSRGVAATVALMQAVEEIGLAAPLWCLTRGAVAVREPSEVTSEFQPLVWGMGVVQGLDQPTTWGGIVDLPQTPDETALARLCSVLAGVDAEDQVAVRASGVFARRM
nagimycin	nagAII	M4	EDH	MM	Streptomyces sp. NA07423	Actinomycetes	WGTVGDVSPALAAAEAPAFADVTEITEAEQGRPTLIVADTTAWESRDADLPTRARELTTRTLDLLQRWVTLPELSETRLGVLTRGAMAVHDSAEVTDPAAAAIWGLVRSAQSEHPGRIHLIDTDGHSDQALPSALATDQPQLALRDNTLWAPRL
nagimycin	nagAII	M5	A1KR	MA21	Streptomyces sp. NA07423	Actinomycetes	WLVLVPSVRADSAPVRAVLDGLAARGAEVVAAEVSETSREALGDQVKSADGGAGVVSLLSWDDRADTEHGTVSMGTLATLAAAQALRDHGVTAPLWCVTRGAVAVAGEAADPVQSAVWGFGAVLGLDHPDTFGGLVDLPAEGEGGDAELPDALFAALCSPEGEDQLAVRAEGLFARRM
nagimycin	nagAIII	M6	0ER-ZDH	M	Streptomyces sp. NA07423	Actinomycetes	WAPLGEAAAGSDTATEGTLPDVLVADTRTWAEDLTEPLPARARELTGHLLEEIQRWVTDDAMAGTRLAVVTRGAVAVHGDAEVTDPAAAAVWGLVRSAQAEHPGRLALVDADGACEELPAGVWSGDEPQLAVRGGTVWVPRL
nagimycin	nagAIII	M7	EDH	MM	Streptomyces sp. NA07423	Actinomycetes	WATVGESGLPDAPSSYADVPEVAGAGERPEVLVADVSAWVPERTGPIDRTHALCARVLDLLREWVDRPELADTRLVVLTRGAMAVHDTAEVTDPAAAAVWGLVRSAQSEHPGRVQLIDVDGHSHQTLPTALTAAEAQLALRDATAYTPHL
Neaumycin B	AYF31946	M1	ER	MM	Micromonospora tulbaghiae	Actinomycetes	WALLGPDRYGLADALGEPHRYRDLAELSAAPAPMTVFFCPEAYPDEGTVAERTLTATHRLLEVVQGWLADWRLASSRLVVVTSRAVDGPAEPVHAALWGLMRTAQIEHPGVFVLLDVAGEVPEAGPLRAAVSVEGGQAALRGGRIRVPRL
Neaumycin B	AYF31950	M10	EDH	M	Micromonospora tulbaghiae	Actinomycetes	FVRQLADAPDVEVTGYPDLAALDAAGASVPDAVFWAAPRVGAGVPDPEAVAAVTEAAWRTLRDWLAKERPSVPLVVLTSGAVRAEQSDTVPEPGGAAVWGLVRSAQQEHPGRFVLLDIDDHPDSIWALPDAVAAALHAGEAQIALRAGQVSAPRT
Neaumycin B	AYF31955	M11	EDH	M	Micromonospora tulbaghiae	Actinomycetes	AGQDLSWTVCGSRLTAVPGAPHYSDLDELLGSTSGATPAVVLAPLPAVADPDLVAATHALTRHTLDLLQRWLAEPTLSDSLLVLVAVAADDTLAPARAAAFGVARSVQAEHPGRIVLLQLDAGFAEPQLVAAALGTGEPELAFRDGMVTVPRL
Neaumycin B	AYF31955	M12	EDH	M	Micromonospora tulbaghiae	Actinomycetes	AGDDIVLLDAPAAPGAGEPLPADLAERVEEAVTGVLAMVRSWLADDRNASARLALVTRGAVVVGAGGEPDPVGGALWGLLRSAQTEHPGRLLLVDVDDDPSSRRLLETAIGGEESQLAIRAGVRYTPRL
Neaumycin B	AYF31955	M13	ER	MA21	Micromonospora tulbaghiae	Actinomycetes	IAAVGGDVFGILDSATPVLPDLAALDGGERPDVVLAFVTAGEDAGTRLAASARDTTQRVLDLVSDWLSDDRCADVQLAVVTRGAVAAGASEDVPDLATAPVWGLLRSAQSEHPERFRLIDIDDSATTELLRAALATGEPQLAVRSGTVLAPRL
Neaumycin B	AYF31956	M14	AKR	M	Micromonospora tulbaghiae	Actinomycetes	WLVVTAGGDAGPEPAAVERALTLAGVTVLRLDLQHGTDRGTVATRVREITDRHGELAGVLSYAGLDHRTDLAHAPLTAGAVATIVLVQGLLDAGVEARLWLVTRGAEQVVPADRPSADAAALAGLARIAGLEHPATWGGVVDLPGAAARPDADAAVLCGLLAGAADDRGEDQFALRAGGVFVRRL
Neaumycin B	AYF31956	M15	0DH-A2KR	MM	Micromonospora tulbaghiae	Actinomycetes	LALVGPDPLPAGLNGELRRFPGLAELRQVVDAGEPVPDLVLVAGVPAELDADTGLAARTRAATRHVLELIRAWTTDERLAHSRLAVVTRGAVATGRQEDVSDPAAAAVWGLLRSAHAEHPERFLVTDVDDREASARALVTALAGAEEQSALRDGRLLVPRL
Neaumycin B	AYF31967	M16	EDH	M	Micromonospora tulbaghiae	Actinomycetes	GQPARPAAEPVIFQVPVGEAVRATVGRMLAELRDWLSGAEGVLAVVTRGAVAIDPGAVPDPVAAAVWGLVRAARSEHPGRFLLMDVEGEGDAAADVATAVATGEFEVAIRDGTAYVPRL
Neaumycin B	AYF31968	M17	AKR	M	Micromonospora tulbaghiae	Actinomycetes	WLLLAPDGYANQERNALAEALTGGGARVVARTVAADRDEMAAVLRDVTAEYGDLAGVLSLMAFAGNTPPGLPGVPTGLAATLDLVHLLGEQGSGAALWCVTRHAVAVDAADEAPDPAQAQVWGLGRVVSLEHADRWGGLVDLPNRVNERTARLVAAVLADPRGEDQVAVRGSGVHVRRL
Neaumycin B	AYF31968	M19	EDH	M	Micromonospora tulbaghiae	Actinomycetes	WVLTGAAGPEAGRRLAAGGLLLVEDPDPAGALGHGVTRHAVTLVRPDAALGDLPAGVHDECARLLSILQDWLAADVPAGSRLVVLTERAVAVRPDEDVTGLAGAAVHGLVRAAQAEHPDRIVLVDVDDVTRSAGLLPLATATALELDEPVIAVRDGELRLPRL
Neaumycin B	AYF31947	M2	EDH	M	Micromonospora tulbaghiae	Actinomycetes	VVFREFDATDGPEHAARWALEQVQQWLVEGPESPGRLMIVTRGPGIEAAAVRGVLRSAETEHPGRFGLLDLDEGEEIPVSALVNRAELAVRGGSVLEPRL
Neaumycin B	AYF31947	M3	0DH-A1KR	MM	Micromonospora tulbaghiae	Actinomycetes	GVEPVPDFAVLPVTAGTAPEPEAVHRTVHEVLSAIQAWLGDDRHATTTLVVTVPAGDDLAGSAVRGLVRTAQAEHPDRFVLLVTETGQATDGEVRAALATGQPQLSLQDGSLRLLRL
Neaumycin B	AYF31948	M4	AKR	M	Micromonospora tulbaghiae	Actinomycetes	WLLVAEEGHELTEQCAAVLASTGRTPVVVVAEAGTSRAGLAAQLRDVLAGRPAEGVLRLGSGGDDRRQVETLATLMQALADAEVDGRLWQTTTGAVAVGPDETVRPWQAAVWGMGQVAALEEPQRWGGLIDLPGEIDPEVAARLVRQVTGASGEDQVALRAGGAYARRL
Neaumycin B	AYF31948	M5	ER	M	Micromonospora tulbaghiae	Actinomycetes	AAIVGPNPWGITAPAGSFSDLAEAAAAGVEPIVCCGDGEQDPEAVRRSTTELLDTVRAWLADDRFAGTVLTVLTRRAVATGPGDDPADLAAAAGWGLLRSAQAEHPGRIRLIDTDAETPADLLRSALAADLPELALRRGRGYVRRL
Neaumycin B	AYF31949	M7	B2KR	MM	Micromonospora tulbaghiae	Actinomycetes	WLILAPATPVRDATGTDLVAAFTADLSRLGAEPVRIDVPVDAADRSTLADLLGEASAAGPVDRVLSLLTLDDRPEPGHPDVPHGFAATVALVQAFGHAGIETPVWCLTRAAVTTGSGDPLRHPAQAPVWGFGRVMVLEHPDRWGGVADLPEIADETARERLLRHVADKSDEDQIAVRPAGLYARRL
Neaumycin B	AYF31949	M8	AKR	M	Micromonospora tulbaghiae	Actinomycetes	WLALAAPGDTTAAACAEAFAAAGSDLSLLYTDPDESRESLVPRLQSTAAAGVLFFPAPGAGQRAVTGLVTVIQALGEANVSAPLWCVTRGAVSVAGTDDAIDPWQAALWGIGRVAALEHPDRWGGLVELSTSGEVAADAALLVRAVGSSGGEDQIALTAGSAYARRL
Neaumycin B	AYF31950	M9	A2KR	MM	Micromonospora tulbaghiae	Actinomycetes	WLAVLPADSGDRLAPMLAALGVRIVRVPESYDRAALAGLLGEEEPAGVLSLLALDDRTDALTGTLALVQALADRGWRTPLWVVTEGAVSVGRADPPPVPEQARIWGLARVAALEHPELWGGLIDLPAGLGAGVERLAALLANSGGEDQVAVRASGAYARRM
nonthmicin	PKS1	M1	EDH	MA3	Actinomadura sp. K4S16	Actinomycetes	GTGPRTVLVSEPGEDADAAAVARAVRTATARVLSALTEPPPAGDPGTVVVITTGGVPGAAAGGLVASAQAEDPGRFVLVDTDDPGSAGPLLPAILATGEPRVRVRGGAVSVPRL
nonthmicin	PKS6	M11	CKR	M	Actinomadura sp. K4S16	Actinomycetes	WLAVVPAAPAADGPLAAVLNALAAGGATVTRASIPDGATTPGQVRSALAQAIGDGGPPPEGVVSLLAFGAEEAEAATLCLVAALAELGVEAPPWIITAGAVGALPSDPPADPHAARLWGVDAAARLIDLPPSLGSAEEARLRVVLSGATGEDDVALRGSGLFARRL
nonthmicin	PKS1	M2	ER	M	Actinomadura sp. K4S16	Actinomycetes	KAETAERGTAFGPDEWPDPAELAGDIGGSAGTGVAVLLADRAGASDLPEAVQATTAEVLALLQGWLAEDRLSGVPLTLVSRRAVATGPQEPAEDLAAAAAWGLVKSAQAENPGRFVLVDSGERDEAAALADAARAASHPGEPCLAVREGGVRAPRL
nonthmicin	PKS2	M3	EDH	MA3	Actinomadura sp. K4S16	Actinomycetes	YAVLGDDVHDLAGRLGTVEHPVENHVDLAALVHTVREGAPGPDLLLFSPDAPSGGGFTATARAELGAALAVLKEWIATGDVLAGTRLALVTRNAAGIEGETPDLAAAAVWGLTRSAQSENPGRIALIDLDPAAEPGSATRSACAAAAREEDLQAAVRGETVLIPRL
nonthmicin	PKS2	M4	ER	M	Actinomadura sp. K4S16	Actinomycetes	CAVIGAAPADLGLPGEVPAHPDVPSLLDAPGPVPDLVFLAPVTEEGGEPAMTVRVRVHATLDAVRSWTGDERIPGGSRLVVVTTGGVTTGDEPVPGDPAEAARCGLVRAVQAERPGRLLLLDTDGTDESRAALGGAAATAVRAGEPEIAVRDGAAFAGRL
nonthmicin	PKS3	M5	A2KR	MM	Actinomadura sp. K4S16	Actinomycetes	WLIVAPPGHPFAGPVAETLAGLGAETHVAAADGARELRSELEIAGVVSLLALAEDDGDRSRVVPAGLAATLELVRWHAQAPEGVPLWCVTRAAVRAGAEDPPPDPRQAMVWGLGRVAALEHPRHWGGLIDLPGEPDERTWVRLSEAISNADGEDQLAVRSSGLRARRL
nonthmicin	PKS3	M6	C2KR	MA3	Actinomadura sp. K4S16	Actinomycetes	WLVVLPEEPGTWADSVAGALEETGLDTVRLRAGDLYAGGNGSSPAAGLRAALAEGRFAGVLSLLAADATPHLAHPAVPRGVANTLALLHALAGTEPDVPLWCVTRGAVSTGPGDPVGDPSQAQLWGLGRVAALEHPRLWGGLVDLPAEPVPDEARHLCAALARTDGEDQLAVRESAVSVRRL
nonthmicin	PKS4	M7	A1KR	MM	Actinomadura sp. K4S16	Actinomycetes	WFVVGDEDDALTVELTTALVRRGVDARIVQSVEEMSDEAAEGILSLLAMDETPDENHHAVPSGLAKSFHLAQRETSAPIWCLTQGAVGTGPGAPPTRPLQAHVWGMGRVAALEHPARWGGLIDLPAVPDERTWDQLCQALTNASGEDQLALRPSGVLTRRL
nonthmicin	PKS5	M8	B2KR	MM	Actinomadura sp. K4S16	Actinomycetes	WLVLTRPESTEVRAVADALAGHGAEVRVAEAAAYGRSDLAEALRQAVEDGEFDGIVSLLSLDGDRVPGEPHVPAGAAGSAALVQAALDTGFTGRLWTLTRGAVRTGEDDAPPDPFQAVTWGLGLVAALEHPGMWGGLIDLPGEGEPDDRTWERLCGILADPGPEDQLAIRPTGVRVRRL
nonthmicin	PKS5	M9	ER	MM	Actinomadura sp. K4S16	Actinomycetes	FSILGAGDPLLADALQDAGHFVQTGGALITGSPGAQNVVVLAPPERNTPAEARAAAAEALHFLQEHLTADPDGTSHLTVVTCGAIATGPGDPLSGPAHSAVWGLVRSAQSEHPARFTLVDLDGDPASGRALPAALAAGEPQIAFRAGTALAPRL
octacosamycin	oca5	M1	ER	M	Amycolatopsis azurea DSM 43854	Actinomycetes	AYPEVVPGKPAVLSVLPEGDPIGSAHELGARVLEVLQDWVTRKESTLVVHTRHSAGPDATDPAAASIWGLVRSAQAEHQGRFVLVDGEAEDVPMAVATGEPQVAVRDGVPLVPRV
octacosamycin	oca11	M10	0DH-BKR	M	Amycolatopsis azurea DSM 43854	Actinomycetes	SWTRLEDVGAELPGAVVLELAEPAGNVADAARTATATVLAALQESTAARLVVLTAGAVALSEEDGADPAAAAVWGLVRAAQSENPGRFVLVDGDGDTSMLGKALATGEDQLLLREGKLYAPKL
octacosamycin	oca12	M11	AKR	M	Amycolatopsis azurea DSM 43854	Actinomycetes	WLLVTSAREHPWIETASQALSGAEVRRLVVEQPDRVDLPDESFDGILSLLALDETETDGLSFGAEATMSLVRELATRDPQGPLWTLTRGAVSTGAHDAPDSPAQAQLWGFGRAAALENPQAWGGLVDVPAEPGERTLALLRGVLTGPRGEDQVAVRATGAFGRRL
octacosamycin	oca12	M12	BKR	M	Amycolatopsis azurea DSM 43854	Actinomycetes	DLVLFAEPGAFADGFAAAAEAAGHRVTVASDMDRQVFAGDGPLRIVHALGLTASGLESGFYSLLELGKAIGAECAGRRVDLLALGRNGFDVLGGDATDAFAPTIAATADAIAAEYPLVRAQYADFDRTGDKVAQATHELDLLAASTVDTVDGVAVAAWRGGRRWLRGF
octacosamycin	oca7	M2	EDH	M	Amycolatopsis azurea DSM 43854	Actinomycetes	GSSDVTPAAIVEADSLDATLAAVQDFLATDEPDPLVVLTGREGAVEGLVRAAQAEHPDRIVLVRGTHADVDAALATGEPEVHALDGSLSAPRL
octacosamycin	oca7	M3	EDH	M	Amycolatopsis azurea DSM 43854	Actinomycetes	VRWDEVTEPVPPVVVLPVPPAGIHAVLVVLQRFLTESRFSGSRLVVVTGDSLDDAAAAGLVRSAQAENPGRFVILDGEVSDVDIALATGEPRVRVRDGRAEVPRL
octacosamycin	oca9	M4	CKR	M	Amycolatopsis azurea DSM 43854	Actinomycetes	WTVYAPENHAWAQAAAKALDAPLVTEVPENGPVLAFPADGAALAALLRDSPAKIWCATGDPGVAAVARVAAIEQPRRWGGCVTLPEDPAVAARLGEVLGGPEDEVAIREDGIFARRF
octacosamycin	oca10	M5	ER	M	Amycolatopsis azurea DSM 43854	Actinomycetes	WARFADVTGDAPEVVVYRAEGDDVHAVTGATLDVLRTFLAEDRFATSKLVVHTGQSDVDPVAAAVWGLVRSAQSEHPDRFLLVDADELTDAVLAAGESQIAVREGELRVPRL
octacosamycin	oca10	M6	EDH	M	Amycolatopsis azurea DSM 43854	Actinomycetes	AVPQQAEDVAVHEATSVEAALEALQAAEDRLVVHLTGDSPEHAAIAGLVRSAQAEYPDKFVLVHGAGDARLAAATGEPEVKFTEDGPRVPRL
octacosamycin	oca10	M7	EDH	M	Amycolatopsis azurea DSM 43854	Actinomycetes	EDVQVFTAPDGAPRDALAATLAAVQEFLADGGTRLVISTGDTPAGAAVRGLARTAASEHPDRFVVLEGDDVSLALATGEPQVRVRDGVAEVPRL
octacosamycin	oca10	M8	ER	M	Amycolatopsis azurea DSM 43854	Actinomycetes	PVPPTELLSAVPGTDETPAAAHALLRSTLAKLQEWLAEEKDTILVVRTENAVAVSTSDTVDPASAAVWGLVRSAQSENPGRLVLLDAAEADVDIALAVLGDETQLAVRDGVVHAARL
octacosamycin	oca11	M9	ER	M	Amycolatopsis azurea DSM 43854	Actinomycetes	WAYHGRVGGGAVPPVVVLPVFTDPAGVGIATREVLAVLQQFSTEDRFADAKLVLVTCAAIGPGRVDPAAAAVWGLGRSAQSELPGRVVLVDTETGDLTETELAAALATGEPQLTLRDSGFAALRL
oleando	PKS1	M1	B2KR	MM	Streptomyces antibioticus	Actinomycetes	WAVAIPARLARDSLLVGAIDALERGGARAVPVVVDERDHDRQALVEALRNGLGDDDLAGVLSLLALDEAPHGDHPDVPVGMAASLALVQAMADAAAEVPVWFATRGAVAALPGESPERPRQALLWGLGRVVALEQPQIWGGLVDLPQHLDEDAGRRLVDVVGGLADEDQLAVRASSVLARRL
oleando	PKS1	M2	A1KR	MM	Streptomyces antibioticus	Actinomycetes	WLFVVPRGLADDGVVARVVAAVTARGGEVSVVELDPTRPDRRAYAEAVAGRGVSGVVSFLSWDDRRHSEHSVVPAGLAASLVLAQALVDLGRVGEGPRLWLVTRGAVVAGPSDAGVVIDPVQAQVWGFGRVLGLEHPELWGGLVDLPVGVDEEVCRRFVGVVASAGFEDQVAVRGSGVWVRRL
oleando	PKS2	M4	ER	MM	Streptomyces antibioticus	Actinomycetes	WAVLGPRVPAAVRTMGVDVVTALDTPDHPADPQSLADLAALGDTVPDVVVVTSLLSLASGADSPLGNRPRPTAAEQDTAATVAGVHSALHAALDLVQAWLADERHTASRLVLVTRHAMTVAESDPEPDLLLAPVWGLVRSAQAENPGRFVLADIDGDEASWDALPRAVASAASEVAIRAGAVYVPRL
oleando	PKS3	M5	A1KR	MM	Streptomyces antibioticus	Actinomycetes	WLVVTPAGTDTTFAESLARTAAAELGVSVSFAQVDTAHPDRSQYAHALRQALTGPENVDHLVSLLALDQATDDLAAAPSCLAASLVLAQALVDLGRVGEGPRLWLVTRGAVVAGPSDAGAVIDPVQAQVWGFGRVLGLEHPELWGGLIDLPVGVDEEVCRRFVGVVASAGFEDQVAVRGSGVWVRRL
oleando	PKS3	M6	A1KR	MM	Streptomyces antibioticus	Actinomycetes	WLFVVPRGLADDGVVARVVAAVTARGGEVSVVELDPTRPDRRAYAEAVAGRGVSGVVSFLSWDDRRHSEHPVVPAGLAASLVLAQALVDLGRVGEGPRLWLVTRDAVVAGPSDAGAVIDPVQAQVWGFGRVLGLEHPELWGGLIDLPVEAPEPGSTCDHTYADLLATVVASAGFEDQVAVRGSGVWVRRL
pretilactam	plmM	M1	EDH	M	Actinosynnema pretiosum subsp. pretiosum	Actinomycetes	ATVLGAGHADLAALGAALSSGATVPETVVHHVPTSTGDVLADVRAALDSVLTVVRQWLADERFGPSRLVVVTRGVRDADLAHTPVWGLVRAAQAENPDRFTLVDLDDAPESAAQLLPAVATGEPELSVRAGKVSVPRL
pretilactam	plmD	M10	EDH	M	Actinosynnema pretiosum subsp. pretiosum	Actinomycetes	WGEVGAEAPGVVVLPIAGCADPDSARAEVHRVLAVLQTWLSENRFAASHLVVVTEGAVSVRGEAAPDLAGAAVWGLVRTAQAENPDLFLLVDLDDWTDLERALPLALASGEPQVVFRDGVGHYPRF
pretilactam	plmD	M11	EDH	M	Actinosynnema pretiosum subsp. pretiosum	Actinomycetes	WALLGGDDLRVGAALKAQGCEVEAHTDLTALGHATDDTAAPDVVVVQFAPGGPLDAAAVQAAAHRALATLQAWLAGPRHAASRLLVLTAGAQDGSDPVNAAVWGLTRSAQSENPDRIVLVDLDGEDESARALPKALASGEPQLVARGGELRAARL
pretilactam	plmM	M2	EDH	M	Actinosynnema pretiosum subsp. pretiosum	Actinomycetes	VTVLDGPDLSALTQVPDWVVLPVSGQAARSTVDDVLSVLRQWIADERFAAARLALVTTGGVPAAGHAVDPVVAPVWGLVRAAQAENPDRFTLLDLDDANDVASAVTTPLGLGEPEVAVRDGALLVPRL
pretilactam	plmM	M3	EDH	M	Actinosynnema pretiosum subsp. pretiosum	Actinomycetes	LLVLGDALGKYVPKVPDLASIGADVPEWVVLPIGSAESSRSAVDLALSTAQEWLADDRFASSTLVVLTRGGAGVGDVPVDPAVTAVHGLIRAAAAENPDRFALVDTDGWPVHWDGLLAALGSGEPEIAVRGDDLLAPRL
[truncated: 47 more rows]

## Sheet: KRc sudomains
BGC code in MIBiG or name of product	Name of protein	Order of module	Annotation	Extender	Organism	Taxonomy	Sequence
[truncated: 1,762 more rows]
